# Supplementary material for: Proximal Protein Interaction Landscape of RAS Paralogs
Source: Cancers (Basel). 2020 Nov 11;12(11):3326. doi: 10.3390/cancers12113326 (PMC7696408; doi:10.3390/cancers12113326)
Supplement: Supplementary file 1 [file cancers-12-03326-s001.zip › Cancers - B¿aganton et al - Supplementary Materials (tables) .xlsx]

## Sheet: Table S1-BioID interactome
Table S1. FB-HRAS, FB-NRAS and FB-KRAS BioID results. Data are presented as spectral counts detected for each prey protein, as indicated. Two technical replicates were performed on each of two unique biological replicates for each bait protein (for a total of four MS analyses). ProteinProphet confidence score p ≥ 0.85, SAINT score ≥ 0.75. For control runs, only the highest two spectral counts (ou…
							FlagBirA*-HRAS WT								FlagBirA*-NRAS WT								FlagBirA*-KRAS WT
							Pool A		Pool B			n=298			Pool A		Pool B			n=258			Pool A		Pool B			n=224
Gene ID	Protein ID	Uniprot ID	Gene Name	Gene Full Name	Top 2 controls		Tech#1	Tech#2	Tech#1	Tech#2	Total	Rank by Total Peptides	Total Unique Peptides	SAINT	Tech#1	Tech#2	Tech#1	Tech#2	Total	Rank by Total Peptides	Total Unique Peptides	SAINT	Tech#1	Tech#2	Tech#1	Tech#2	Total	Rank by Total Peptides	Total Unique Peptides	SAINT
948469	16131807	P06709	birA	Bifunctional ligase/repressor BirA	2538	2526	5262	5601	5100	5374	21337	-	104	-	2646	2682	2598	2544	10470	-	111	-	1618	1839	1689	1808	6954	-	100	-
3265	194363762	P01112	HRAS	Harvey rat sarcoma viral oncogene homolog	1	0	1343	1432	1311	1338	5424	-	55	-			1		1	-	1	-					0	-	0	-
3845	15718761	P01116	KRAS	Kirsten rat sarcoma viral oncogene homolog	1	0					0	-	0	-					0	-	0	-	199	237	283	269	988	-	48	-
4893	4505451	P01111	NRAS	neuroblastoma RAS viral (v-ras) oncogene homolog	0	0					0	-	0	-	461	526	627	616	2230	-	42	-					0	-	0	-
8471	4504733	O14654	IRS4	insulin receptor substrate 4	32	29	677	646	592	574	2489	1	174	1.00	616	634	638	606	2494	1	176	1.00	380	460	566	558	1964	1	161	1.00
4301	333108224	P55196	MLLT4	myeloid/lymphoid or mixed-lineage leukemia; translocated to, 4	78	70	567	555	519	582	2223	2	275	1.00	460	493	526	527	2006	2	251	1.00	258	308	363	368	1297	3	225	1.00
23136	32490572	Q9Y2J2	EPB41L3	erythrocyte membrane protein band 4.1-like 3	84	78	502	487	487	489	1965	3	155	1.00	431	432	520	535	1918	3	156	1.00	238	329	430	408	1405	2	139	1.00
10652	5730120	O15498	YKT6	YKT6 v-SNARE homolog (S. cerevisiae)	13	13	428	481	482	506	1897	4	41	1.00	157	169	160	161	647	20	36	1.00	164	190	138	138	630	9	37	1.00
2023	4503571	P06733	ENO1	enolase 1, (alpha)	75	66	384	372	387	417	1560	5	71	1.00	308	311	313	336	1268	4	64	1.00	150	169	195	188	702	-	63
10979	201861813	Q96AC1	FERMT2	fermitin family member 2	17	16	398	355	395	399	1547	6	130	1.00	177	171	210	206	764	15	98	1.00	123	153	154	153	583	11	96	1.00
1500	146231938	O60716	CTNND1	catenin delta 1	13	11	320	330	331	308	1289	7	156	1.00	280	294	313		887	-	106		184	220	257	252	913	5	132	1.00
1829	116534898	Q14126	DSG2	desmoglein 2	23	16	293	255	291	263	1102	8	128	1.00	296	299	271	267	1133	5	119	1.00	210	242	271	285	1008	4	124	1.00
144402	25121972	Q86YQ8	CPNE8	copine VIII	9	9	281	253	286	280	1100	9	85	1.00	174	169	129	118	590	23	71	1.00	77	84	92	88	341	38	58	1.00
120	62912453	Q9UEY8	ADD3	adducin 3	14	13	280	252	250	268	1050	10	117	1.00	261	280	272	283	1096	6	102	1.00	186	245	238	244	913	5	124	1.00
9497	385648268	Q9Y6M7	SLC4A7	solute carrier family 4, sodium bicarbonate cotransporter, member 7	6	6	266	271	240	229	1006	11	114	1.00	313	302	318	335	1268	4	114	1.00	132	188	204	169	693	7	108	1.00
476	21361181	P05023	ATP1A1	ATPase, Na+/K+ transporting, alpha 1 polypeptide	8	7	255	270	185	271	981	12	105	1.00	93	102	103	108	406	47	94	1.00	87	96	91	105	379	31	94	1.00
2037	4503579	O43491	EPB41L2	erythrocyte membrane protein band 4.1-like 2	54	47	149	134	144	554	981	12	99	1.00	84	91	174	155	504	-	48		111	141	165	162	579	-	61
498	4757810	P25705	ATP5A1	ATP synthase, H+ transporting, mitochondrial F1 complex, alpha subunit 1, cardiac muscle	53	51	226	233	238	235	932	13	77	1.00	206	215	234	219	874	11	80	1.00	123	129	128	124	504	-	81
23344	14149680	Q9BSJ8	ESYT1	extended synaptotagmin-like protein 1	33	31	228	234	203	237	902	14	120	1.00	194	176	199	177	746	16	112	1.00	164	153	161	161	639	8	130	1.00
6510	5032093	Q15758	SLC1A5	solute carrier family 1 (neutral amino acid transporter), member 5	9	7	226	224	217	233	900	15	53	1.00	149	142	135	129	555	30	46	1.00	84	98	105	100	387	28	41	1.00
10397	207028748	Q92597	NDRG1	N-myc downstream regulated 1	23	23	213	208	221	214	856	16	52	1.00	163	145	128	136	572	26	41	1.00	57	58	79	70	264	-	37
8407	4507357	P37802	TAGLN2	transgelin 2	44	44	216	200	219	218	853	17	47	1.00	67	77	64	59	267	-	31		48	58	57	55	218	-	25
100506658	327478414	Q16625	OCLN	occludin	5	2	200	219	210	219	848	18	71	1.00	56	64	115	111	346	60	51	1.00	87	93	93	105	378	32	56	1.00
1207	4502891	P54105	CLNS1A	chloride channel, nucleotide-sensitive, 1A	13	12	221	207	221	197	846	19	31	1.00	183	183	170	163	699	18	28	1.00	103	120	102	104	429	23	32	1.00
57175	14149734	Q9BR76	CORO1B	coronin, actin binding protein, 1B	67	64	208	190	211	227	836	20	72	1.00	112	110	107	103	432	-	53		95	102	110	109	416	-	54
6558	374253823	P55011	SLC12A2	solute carrier family 12 (sodium/potassium/chloride transporter), member 2	6	4	214	206	199	204	823	21	131	1.00	226	245	290	263	1024	7	131	1.00	121	151	181	165	618	10	120	1.00
5315	33286418	P14618	PKM2	pyruvate kinase, muscle	59	58	209	225	185	203	822	22	76	1.00	73	70	89	88	320	-	71		81	103	81	79	344	-	73
506	32189394	P06576	ATP5B	ATP synthase, H+ transporting, mitochondrial F1 complex, beta polypeptide	31	29	201	160	190	204	755	23	87	1.00	137	138	121	107	503	34	79	1.00	75	81	72	63	291	-	75
23513	355390313	Q14160	SCRIB	scribbled planar cell polarity protein	16	15	186	184	198	173	741	24	150	1.00	199	206	241	193	839	13	167	1.00	117	147	145	143	552	14	138	1.00
118	29826319	P35611	ADD1	adducin 1	18	15	192	172	179	190	733	25	81	1.00	175	187	180	183	725	17	69	1.00	112	128	167	158	565	12	70	1.00
6950	57863257	P17987	TCP1	t-complex 1	59	58	184	173	188	168	713	26	109	1.00	127	107	116	125	475	-	84		75	86	88	77	326	-	80
8773	18765729	O00161	SNAP23	synaptosome associated protein 23kDa	4	3	166	184	164	168	682	27	57	1.00	125	116	137	114	492	35	40	1.00	105	127	132	131	495	15	52	1.00
3688	19743813	P05556	ITGB1	integrin subunit beta 1	1	1	167	163	180	170	680	28	66	1.00	147	146	138	135	566	28	56	1.00	91	103	111	111	416	25	57	1.00
5819	112789532	Q92692	PVRL2	poliovirus receptor-related 2 (herpesvirus entry mediator B)	3	0	164	168	167	171	670	29	70	1.00	61	62	97	86	306	72	45	1.00	56	65	71	72	264	58	47	1.00
3996	62912476	Q15334	LLGL1	lethal giant larvae homolog 1 (Drosophila)	7	6	171	162	181	153	667	30	93	1.00	127	137	144	153	561	29	79	1.00	50	80	88	88	306	46	62	1.00
3728	12056468	P14923	JUP	junction plakoglobin	9	9	182	152	145	166	645	31	113	1.00	211	202	189	172	774	14	95	1.00	120	146	150	141	557	13	94	1.00
6520	61744477	P08195	SLC3A2	solute carrier family 3 (amino acid transporter heavy chain), member 2	1	1	170	141	145	141	597	32	98	1.00	228	227	224	199	878	10	131	1.00	13	114	123	17	267	57	60	1.00
708	4502491	Q07021	C1QBP	complement component 1, q subcomponent binding protein	45	41	138	152	151	145	586	33	30	1.00	47	54	88	81	270	-	29		67	71	95	90	323	-	35
59338	31377720	Q9HB21	PLEKHA1	pleckstrin homology domain containing A1	8	7	136	140	160	133	569	34	73	1.00	119	98	110	120	447	40	53	1.00	62	67	79	73	281	55	48	1.00
4162	71274107	P43121	MCAM	melanoma cell adhesion molecule	0	0	158	142	134	130	564	35	64	1.00	83	102	86	94	365	56	47	1.00	70	82	76	75	303	48	48	1.00
58513	10864047	Q9UBC2	EPS15L1	epidermal growth factor receptor pathway substrate 15-like 1	50	47	151	138	144	129	562	36	122	1.00	74	66	104	86	330	-	105		73	28	102	38	241	-	72
1525	4503173	P78310	CXADR	coxsackie virus and adenovirus receptor	2	1	148	131	144	137	560	37	58	1.00	73	67	42	48	230	91	36	1.00	44	60	72	68	244	63	40	1.00
7525	4885661	P07947	YES1	YES proto-oncogene 1, Src family tyrosine kinase	3	0	143	137	131	143	554	38	60	1.00	75	69	93	93	330	65	47	1.00	52	50	63	58	223	71	42	1.00
55914	358679323	Q96RT1	ERBB2IP	erbb2 interacting protein	21	20	186	173		176	535	-	102		218	238	260	259	975	8	173	1.00	169		211	212	592	-	119
1399	4885153	P46109	CRKL	v-crk avian sarcoma virus CT10 oncogene homolog-like	47	42	134	127	143	128	532	39	49	1.00	63	73	99	84	319	-	57		59	75	63	72	269	-	50
64855	51093863	Q96TA1	FAM129B	family with sequence similarity 129 member B	11	10	125	127	137	135	524	40	70	1.00	74	77	69	67	287	75	66	1.00	73	87	80	73	313	45	69	1.00
1654	301171467	O00571	DDX3X	DEAD-box helicase 3, X-linked	36	34	128	115	145	131	519	41	73	1.00	84	77	103	92	356	-	57		57	63	69	61	250	-	60
4067	162287326	P07948	LYN	LYN proto-oncogene, Src family tyrosine kinase	0	0	142	129	135	109	515	42	60	1.00	75	62	72	72	281	76	55	1.00	52	60	63	59	234	66	54	1.00
23266	6912464	O95490	LPHN2	adhesion G protein-coupled receptor L2	1	0	125	135	127	122	509	43	93	1.00	82	99	126	109	416	44	98	1.00	84	95	90	88	357	36	93	1.00
2597	7669492	P04406	GAPDH	glyceraldehyde-3-phosphate dehydrogenase	35	29	134	119	121	134	508	44	53	1.00	149	137	119	104	509	33	54	1.00	74	75	59	60	268	-	45
56829	27477136	Q7Z2W4	ZC3HAV1	zinc finger CCCH-type, antiviral 1	30	26	136	126	117	126	505	45	96	1.00	94	94	101	96	385	51	87	1.00	93	121	131	142	487	16	91	1.00
51520	108773810	Q9P2J5	LARS	leucyl-tRNA synthetase	34	33	115	125	124	132	496	46	88	1.00	40	51	65	59	215	-	77		60	62	60	59	241	-	86
4869	10835063	P06748	NPM1	nucleophosmin (nucleolar phosphoprotein B23, numatrin)	47	43	119	123	116	126	484	47	25	0.97	102	100	102	117	421	-	21		72	72	74	66	284	-	24
908	4502643	P40227	CCT6A	chaperonin containing TCP1 subunit 6A	45	44	120	111	128	120	479	48	72	0.76	54	63	70	71	258	-	61		34	51	45	39	169	-	53
3326	20149594	P08238	HSP90AB1	heat shock protein 90kDa alpha family class B member 1	33	33	111	118	123	124	476	49	98	1.00	81	65	76	77	299	-	72		81	100	110	112	403	-	88
1969	32967311	P29317	EPHA2	EPH receptor A2	10	9	131	101	125	114	471	50	87	1.00	129	150	166	143	588	24	100	1.00	67	98	148	130	443	20	92	1.00
2319	94538362	Q14254	FLOT2	flotillin 2	7	5	127	111	125	108	471	50	75	1.00	106	111	114	120	451	39	71	1.00	89	97	98	94	378	32	72	1.00
1948	4758250	P52799	EFNB2	ephrin-B2	0	0	116	115	122	112	465	51	45	1.00	66	64	60	58	248	82	33	1.00	41	46	51	46	184	87	23	1.00
10575	38455427	P50991	CCT4	chaperonin containing TCP1 subunit 4	27	26	115	116	123	111	465	51	57	1.00	80	75	77	67	299	74	49	0.83	38	64	45	48	195	-	44
4853	24041035	Q04721	NOTCH2	notch 2	2	2	107	125	119	112	463	52	87	1.00	169	158	146	136	609	21	79	1.00	83	84	96	111	374	35	79	1.00
4735	4758158	Q15019	SEPT2	septin 2	22	19	115	116	107	116	454	53	51	1.00	83	93	158	132	466	37	45	1.00	75	82	86	74	317	43	47	1.00
10787	45545411	Q9Y2A7	NCKAP1	NCK-associated protein 1	17	12	107	102	126	105	440	54	97	1.00	160	172	139	128	599	22	106	1.00	97	96	102	94	389	27	99	1.00
23670	7019555	Q9UHN6	TMEM2	transmembrane protein 2	0	0	104	120	111	104	439	55	95	1.00	68	66	71	59	264	77	80	1.00	36	52	39	43	170	96	69	1.00
51741	7706523	Q9NZC7	WWOX	WW domain containing oxidoreductase	31	30	105	114	119	100	438	56	52	1.00	91	81	108	109	389	50	49	1.00	83	96	94	102	375	34	50	1.00
5783	18375646	Q12923	PTPN13	protein tyrosine phosphatase, non-receptor type 13	13	13	113	112	117	95	437	57	152	1.00	115	106	132	125	478	36	194	1.00	96	122	138	126	482	17	195	1.00
4841	224028244	Q15233	NONO	non-POU domain containing, octamer-binding	43	38	106	105	118	106	435	58	51	0.96	64	66	85	83	298	-	46		47	68	63	66	244	-	39
23236	12083581	Q9NQ66	PLCB1	phospholipase C beta 1	0	0	115	99	107	113	434	59	102	1.00	35	46	62	51	194	108	78	1.00	59	58	51	59	227	69	77	1.00
7402	110611228	P46939	UTRN	utrophin	30	30	105	101	113	107	426	60	157	1.00	76	72	121	99	368	-	180		81	96	119	111	407	26	199	1.00
3655	119395740	P23229	ITGA6	integrin subunit alpha 6	0	0	97	102	117	108	424	61	92	1.00	115	112	127	112	466	37	96	1.00	88	95	102	96	381	30	91	1.00
1824	13435364	Q02487	DSC2	desmocollin 2	2	1	108	101	105	107	421	62	51	1.00	78	81	104	83	346	60	53	1.00	60	72	97	85	314	44	51	1.00
26064	224809468	Q9P0K7	RAI14	retinoic acid induced 14	15	15	109	112	103	97	421	62	112	1.00	154	160	190	175	679	19	139	1.00	73	90	142	144	449	19	128	1.00
302	209862831	P07355	ANXA2	annexin A2	21	19	99	100	103	113	415	63	78	1.00	47	43	44	42	176	-	45		50	54	51	52	207	-	57
54407	21361602	Q96QD8	SLC38A2	solute carrier family 38 member 2	3	2	104	102	104	101	411	64	17	1.00	25	27	29	27	108	164	18	1.00	27	28	31	32	118	124	19	1.00
55789	223633999	Q8WUY9	DEPDC1B	DEP domain containing 1B	13	11	106	106	98	98	408	65	67	1.00	86	91	127	107	411	46	75	1.00	70	72	95	100	337	39	75	1.00
55117	33354281	Q9H2J7	SLC6A15	solute carrier family 6 (neutral amino acid transporter), member 15	3	2	106	93	100	104	403	66	75	1.00	65	64	64	69	262	78	59	1.00	58	72	78	82	290	52	68	1.00
11180	197927448	Q9NNW5	WDR6	WD repeat domain 6	4	2	106	101	86	105	398	67	80	1.00	156	141	144	128	569	27	101	1.00	101	104	109	120	434	22	87	1.00
57488	45387945	A0FGR8	ESYT2	extended synaptotagmin-like protein 2	12	12	103	100	106	89	398	67	71	1.00	61	78	99	86	324	67	88	1.00	54	67	71	70	262	59	73	1.00
4522	222136639	P11586	MTHFD1	methylenetetrahydrofolate dehydrogenase (NADP+ dependent) 1, methenyltetrahydrofolate cyclohydrolase, formyltetrahydrofolate synthetase	24	18	89	89	107	104	389	68	90	1.00	60	59	58	53	230	91	71	0.83	40	43	50	49	182	-	67
54477	374349211	Q9HAU0	PLEKHA5	pleckstrin homology domain containing A5	9	9	97	106	97	88	388	69	104	1.00	74	96	100	97	367	55	109	1.00	66	76	75	87	304	47	107	1.00
6535	218563756	P48029	SLC6A8	solute carrier family 6 (neurotransmitter transporter), member 8	1	1	97	106	94	88	385	70	52	1.00	134	103	53	59	349	58	39	1.00	38	45	58	62	203	78	43	1.00
11331	221307584	Q99623	PHB2	prohibitin 2	23	21	92	100	101	92	385	70	53	1.00	96	89	82	82	349	58	49	1.00	62	64	87	81	294	50	50	1.00
7203	63162572	P49368	CCT3	chaperonin containing TCP1 subunit 3	36	27	94	87	101	103	385	70	60	1.00	61	68	72	68	269	-	57		38	41	51	49	179	-	52
987	345498499	P50851	LRBA	LPS-responsive vesicle trafficking, beach and anchor containing	36	34	83	96	96	99	374	-	115		156	145	117	108	526	31	187	1.00	91	107	108	117	423	24	154	0.97
27143	166235184	Q9ULE6	KIAA1274	phosphatase domain containing, paladin 1	24	22	94	101	94	85	374	71	79	1.00	104	107	115	92	418	43	94	1.00	64	77	78	71	290	52	85	1.00
23191	24307969	Q7L576	CYFIP1	cytoplasmic FMR1 interacting protein 1	10	9	85	89	96	102	372	72	81	1.00	118	101	114	95	428	41	98	1.00	57	68	69	66	260	60	85	1.00
3320	153792590	P07900	HSP90AA1	heat shock protein 90kDa alpha family class A member 1	32	29	93	87	90	94	364	73	80	1.00	60	29	66	63	218	-	65		59	70	87	88	304	-	81
5099	291084612	O60245	PCDH7	protocadherin 7	0	0	100	90	80	88	358	74	94	1.00	71	72	79	78	300	73	86	1.00	52	56	65	64	237	64	77	1.00
3105	24797067	P01891	HLA-A	major histocompatibility complex, class I, A	4	2	91	87	85	94	357	75	39	1.00	48	58	67	67	240	88	42	1.00	22	27	40	43	132	114	36	1.00
8216	47717139	Q8N653	LZTR1	leucine-zipper-like transcription regulator 1	0	0	90	87	85	95	357	75	76	1.00	121	108	111	115	455	38	103	1.00	84	85	106	101	376	33	87	1.00
114882	18079218	Q9BZF1	OSBPL8	oxysterol binding protein like 8	9	8	86	94	85	90	355	76	61	1.00	68	73	86	82	309	71	60	1.00	49	52	73	63	237	64	66	1.00
488	24638454	P16615	ATP2A2	ATPase, Ca++ transporting, cardiac muscle, slow twitch 2	24	23	90	83	101	81	355	76	61	1.00	18	23	32	27	100	-	43		58	65	60	60	243	-	67
989	148352329	Q16181	SEPT7	septin 7	15	14	92	81	91	90	354	77	59	1.00	73	95	109	91	368	54	53	1.00	41	53	67	69	230	68	51	1.00
10801	164698498	Q9UHD8	SEPT9	septin 9	16	16	95	70	96	89	350	78	64	1.00	50	44	59	57	210	100	57	0.99	40	48	63	55	206	76	53	0.81
11252	148747351	Q9UNF0	PACSIN2	protein kinase C and casein kinase substrate in neurons 2	10	9	99	84	79	86	348	79	62	1.00	33	40	66	60	199	105	36	1.00	48	42	49	53	192	83	43	1.00
55243	166295173	Q96J84	KIRREL	kin of IRRE like (Drosophila)	0	0	83	100	79	85	347	80	76	1.00	80	79	88	82	329	66	71	1.00	56	72	76	84	288	53	72	1.00
7284	34147630	P49411	TUFM	Tu translation elongation factor, mitochondrial	26	23	91	84	80	92	347	80	67	1.00	77	78	79	81	315	68	61	1.00	39	50	66	62	217	-	55
1266	4502923	Q15417	CNN3	calponin 3, acidic	24	20	86	71	96	94	347	80	43	1.00	23	29	16	16	84	-	26		17	20	23	23	83	-	25
2017	20357552	Q14247	CTTN	cortactin	33	31	84	85	90	84	343	81	57	0.97	48	49	52	54	203	-	49		29	32	47	48	156	-	37
4176	33469968	P33993	MCM7	minichromosome maintenance complex component 7	25	23	84	86	94	78	342	82	71	1.00	95	119	101	99	414	45	84	1.00	51	55	58	53	217	-	77
1947	4758248	P98172	EFNB1	ephrin-B1	1	0	91	93	81	75	340	83	40	1.00	68	73	59	58	258	79	37	1.00	42	45	45	48	180	89	28	1.00
667	34577049	Q03001	DST	dystonin	23	21	78	95	78	89	340	83	123	1.00	208	209	249	229	895	9	246	1.00	159	191	224	211	785	6	227	1.00
26999	116805788	Q96F07	CYFIP2	cytoplasmic FMR1 interacting protein 2	11	11	77	80	94	89	340	83	68	1.00	128	110	96	90	424	42	97	1.00	68	87	89	97	341	38	102	1.00
8496	312032469	Q86W92	PPFIBP1	PTPRF interacting protein, binding protein 1 (liprin beta 1)	2	1	72	83	86	90	331	84	80	1.00	73	91	130	117	411	46	114	1.00	87	5	16	21	129	116	41	0.97
6709	154759259	Q13813	SPTAN1	spectrin, alpha, non-erythrocytic 1	12	8	96	69	79	83	327	85	128	1.00	70	71	106	93	340	61	157	1.00	81	4	2	3	90	-	46
23603	7656991	Q9ULV4	CORO1C	coronin, actin binding protein, 1C	18	16	81	75	80	91	327	85	48	1.00	47	45	28	30	150	-	29		24	22	29	28	103	-	24
1739	324120936	Q12959	DLG1	discs, large homolog 1 (Drosophila)	17	16	1	18	169	138	326	-	60		184	150	270	246	850	12	113	1.00	130	142	18	193	483	-	86
4140	193083125	P27448	MARK3	MAP/microtubule affinity-regulating kinase 3	5	4	81	71	82	90	324	86	69	1.00	63	72	82	89	306	72	68	1.00	28	44	50	51	173	94	57	1.00
9342	4759154	O95721	SNAP29	synaptosome associated protein 29kDa	8	8	87	64	87	85	323	87	39	1.00	49	51	63	67	230	91	40	1.00	32	50	46	51	179	90	38	1.00
3673	116295258	P17301	ITGA2	integrin subunit alpha 2	0	0	73	82	77	91	323	87	76	1.00	73	82	93	90	338	62	71	1.00	38	48	46	52	184	87	63	1.00
3309	16507237	P11021	HSPA5	heat shock protein family A (Hsp70) member 5	25	22	78	88	82	75	323	87	65	1.00	49	55	92	79	275	-	74		64	66	70	80	280	56	76	1.00
26227	23308577	O43175	PHGDH	phosphoglycerate dehydrogenase	16	16	79	81	81	82	323	87	51	1.00	42	32	32	22	128	-	36		26	35	28	20	109	-	39
490	48255945	P20020	ATP2B1	ATPase, Ca++ transporting, plasma membrane 1	4	3	86	97	83	56	322	88	69	1.00	43	41	56	74	214	98	52	1.00	35	50	53	76	214	74	65	1.00
9522	116256358	O15126	SCAMP1	secretory carrier membrane protein 1	5	4	80	84	81	77	322	88	28	1.00	39	35	36	43	153	130	26	1.00	31	39	45	46	161	99	26	1.00
3685	223468595	P06756	ITGAV	integrin subunit alpha V	0	0	87	75	78	81	321	89	74	1.00	72	59	58	54	243	86	61	1.00	51	61	72	70	254	62	80	1.00
7531	5803225	P62258	YWHAE	tyrosine 3-monooxygenase/tryptophan 5-monooxygenase activation protein, epsilon	17	15	80	81	77	83	321	89	48	1.00	41	46	64	73	224	94	38	0.89	35	53	86	85	259	-	48
10298	5031975	O96013	PAK4	p21 protein (Cdc42/Rac)-activated kinase 4	8	7	88	77	77	76	318	90	67	1.00	82	81	95	89	347	59	63	1.00	41	48	56	61	206	76	50	1.00
71	316659409	P63261	ACTG1	actin gamma 1	30	29	79	80	78	80	317	91	29	0.99	50	75	72	74	271	-	34		35	46	53	45	179	-	33
51599	386781463	Q86X29	LSR	lipolysis stimulated lipoprotein receptor	2	1	88	81	64	79	312	92	53	1.00	42	43	64	70	219	96	34	1.00	22	43	40	55	160	100	46	1.00
81839	20373171	Q8TAA9	VANGL1	VANGL planar cell polarity protein 1	1	1	85	76	69	82	312	92	64	1.00	145	169	133	139	586	25	71	1.00	96	115	126	127	464	18	72	1.00
143098	111154074	Q5T2T1	MPP7	membrane protein, palmitoylated 7	2	2	88	73	71	78	310	93	68	1.00	72	77	91	94	334	64	81	1.00	57	72	84	74	287	54	87	1.00
6711	112382250	Q01082	SPTBN1	spectrin, beta, non-erythrocytic 1	5	5	76	79	73	78	306	94	104	1.00	34	41	67	72	214	98	124	1.00	54	51	94	94	293	51	140	1.00
11183	14589909	Q9Y4K4	MAP4K5	mitogen-activated protein kinase kinase kinase kinase 5	10	10	78	77	73	76	304	95	68	1.00	19	22	40	43	124	-	55		21	28	33	35	117	-	41
3678	56237029	P08648	ITGA5	integrin subunit alpha 5	0	0	77	80	70	75	302	96	48	1.00	46	41	32	33	152	131	41	1.00	36	48	43	47	174	93	45	1.00
6714	38202217	P12931	SRC	SRC proto-oncogene, non-receptor tyrosine kinase	0	0	73	77	74	78	302	96	49	1.00	33	33	40	36	142	141	46	1.00	24	29	34	29	116	125	39	1.00
60	4501885	P60709	ACTB	actin, beta	0	0	76	75	73	76	300	97	29	1.00					0	-	0						0	-	0
4354	262118263	Q00013	MPP1	membrane protein, palmitoylated 1	10	7	70	68	73	82	293	98	54	1.00	32	31	62	42	167	122	43	1.00	53	54	46	42	195	81	44	1.00
983	4502709	P06493	CDK1	cyclin-dependent kinase 1	20	17	65	77	69	79	290	99	39	1.00	48	55	69	73	245	84	43	0.93	43	57	43	45	188	-	42
10399	5174447	P63244	GNB2L1	guanine nucleotide binding protein (G protein), beta polypeptide 2-like 1	18	15	69	77	77	62	285	100	50	1.00	52	58	27	32	169	-	31		49	46	55	60	210	75	32	1.00
55971	32171238	Q9UHR4	BAIAP2L1	BAI1-associated protein 2-like 1	6	6	80	65	78	61	284	101	57	1.00	41	36	30	26	133	147	47	1.00	20	29	29	28	106	132	40	1.00
5245	4505773	P35232	PHB	prohibitin	16	15	62	69	75	73	279	102	43	1.00	56	49	58	51	214	98	38	1.00	49	54	46	42	191	84	40	0.99
51429	7706706	Q9Y5X1	SNX9	sorting nexin 9	18	14	74	70	70	65	279	102	53	1.00	40	47	60	55	202	102	42	0.81	46	51	45	51	193	82	48	1.00
25921	41152072	Q9C0B5	ZDHHC5	zinc finger, DHHC-type containing 5	2	0	76	60	65	78	279	102	59	1.00	71	73	89	78	311	70	62	1.00	29	52	55	59	195	81	62	1.00
11336	31083351	O60645	EXOC3	exocyst complex component 3	11	10	69	62	81	67	279	102	78	1.00	31	33	39	44	147	136	62	1.00	52	57	57	66	232	67	70	1.00
65979	115430209	Q8IZ21	PHACTR4	phosphatase and actin regulator 4	9	8	71	70	76	60	277	103	61	1.00	77	74	77	71	299	74	74	1.00	45	41	55	58	199	79	58	1.00
1186	14149607	P51798	CLCN7	chloride channel, voltage-sensitive 7	6	5	66	61	74	73	274	104	55	1.00	10	12	15	17	54	-	27		23	32	32	31	118	124	37	1.00
5832	21361368	P54886	ALDH18A1	aldehyde dehydrogenase 18 family member A1	19	17	79	65	62	67	273	105	55	1.00	90	91	91	91	363	57	86	1.00	42	55	42	51	190	-	65
5962	4506467	P35241	RDX	radixin	10	10	83	66	67	57	273	105	39	1.00	6	14	13	8	41	-	22		20	19	24		63	-	24
768211	146094506	Q8IUW5	RELL1	RELT-like 1	0	0	65	71	67	69	272	106	32	1.00	21	26	37	38	122	156	24	1.00	23	32	35	37	127	118	24	1.00
10131	155722983	Q12931	TRAP1	TNF receptor-associated protein 1	24	23	62	73	72	58	265	-	72		65	77	54	57	253	-	79		67	83	77	72	299	49	81	1.00
7416	4507879	P21796	VDAC1	voltage-dependent anion channel 1	16	15	72	62	60	68	262	107	47	1.00	46	43	43	45	177	117	36	0.99	44	47	50	48	189	85	43	1.00
23301	217330568	Q8NDI1	EHBP1	EH domain binding protein 1	11	8	68	69	65	58	260	108	71	1.00	28	40	55	47	170	121	77	1.00	56	64	71	68	259	61	97	1.00
55832	21361794	Q86VP6	CAND1	cullin-associated and neddylation-dissociated 1	21	18	61	61	71	67	260	108	63	1.00	66	68	50	65	249	81	72	0.92	46	53	44	43	186	-	62
9685	307078123	Q14677	CLINT1	clathrin interactor 1	22	21	68	61	72	57	258	109	61	0.98	49	54	63	61	227	-	64		41	63	80	77	261	-	67
348110	32699050	Q7Z6K5	C15orf38	actin-related protein 2/3 complex inhibitor	25	0	59	59	74	65	257	110	24	0.97					0	-	0						0	-	0
10768	21361647	O43865	AHCYL1	adenosylhomocysteinase like 1	7	6	67	68	62	58	255	111	33	1.00	11	11	24	28	74	-	24		24	28	28	32	112	129	27	1.00
23362	117606360	Q9NYI0	PSD3	pleckstrin and Sec7 domain containing 3	2	1	65	64	60	61	250	112	59	1.00	22	24	41	39	126	152	61	1.00	38	43	46	52	179	90	71	1.00
3930	37595750	Q14739	LBR	lamin B receptor	25	24	73	56	58	60	247	-	35		78	91	63	58	290	-	38		70	74	110	92	346	37	42	1.00
5586	5453974	Q16513	PKN2	protein kinase N2	20	19	62	63	59	63	247	113	67	1.00	35	44	53	43	175	-	79		38	45	42	41	166	-	68
55717	13324688	Q9BZH6	WDR11	WD repeat domain 11	17	17	63	59	60	61	243	114	67	1.00	83	95	97	95	370	53	87	1.00	98	93	101	94	386	29	107	1.00
55240	56549145	Q658P3	STEAP3	STEAP3 metalloreductase	3	2	72	55	56	59	242	115	41	1.00	98	96	91	87	372	52	35	1.00	51	62	57	55	225	70	36	1.00
10458	222080100	Q9UQB8	BAIAP2	BAI1-associated protein 2	6	5	66	66	52	58	242	115	60	1.00	54	55	64	59	232	90	64	1.00	57	57	56	57	227	69	68	1.00
1072	5031635	P23528	CFL1	cofilin 1 (non-muscle)	11	10	54	60	67	61	242	115	34	1.00	37	34	38	39	148	135	25	1.00	22	37	38	39	136	-	25
83461	13876384	Q99618	CDCA3	cell division cycle associated 3	4	4	63	69	54	55	241	116	28	1.00	30	28	32	35	125	153	25	1.00	24	29	32	30	115	126	21	1.00
9765	157426864	Q7Z3T8	ZFYVE16	zinc finger, FYVE domain containing 16	17	14	55	62	61	63	241	116	59	1.00	11	11	20	16	58	-	32		47	46	57	55	205	77	76	1.00
7417	296317337	P45880	VDAC2	voltage-dependent anion channel 2	20	20	61	58	58	63	240	117	36	1.00	56	59	41	46	202	-	32		31	39	30	33	133	-	32
9341	4759300	Q15836	VAMP3	vesicle associated membrane protein 3	5	5	42	58	87	51	238	118	13	1.00	35	39	42	29	145	138	11	1.00	33	50	38	24	145	109	12	1.00
5464	11056044	Q15181	PPA1	pyrophosphatase (inorganic) 1	17	13	58	51	65	59	233	119	45	1.00	46	43	40	41	170	121	38	0.96	32	43	37	38	150	-	37
7779	52352803	Q9Y6M5	SLC30A1	solute carrier family 30 (zinc transporter), member 1	0	0	52	56	59	65	232	120	37	1.00	37	38	64	62	201	103	34	1.00	34	46	45	55	180	89	34	1.00
51510	189409150	Q9NZZ3	CHMP5	charged multivesicular body protein 5	10	8	59	66	58	49	232	120	20	1.00	5	4	15	13	37	-	10		27	24	19	19	89	-	13
11135	23238226	Q00587	CDC42EP1	CDC42 effector protein 1	1	1	67	46	63	53	229	121	38	1.00	50	64	50	47	211	99	43	1.00	43	53	55	47	198	80	40	1.00
5901	5453555	P62826	RAN	RAN, member RAS oncogene family	24	23	49	61	57	62	229	-	36		136	106	113	96	451	39	33	1.00	36	46	65	55	202	-	35
55752	8922712	Q9NVA2	SEPT11	septin 11	12	10	53	55	64	57	229	121	54	1.00	44	52	50	50	196	106	50	1.00	21	33	47	44	145	-	47
28982	7661708	Q9Y5Y0	FLVCR1	feline leukemia virus subgroup C cellular receptor 1	0	0	58	57	48	62	225	122	36	1.00	23	23	45	41	132	148	32	1.00	25	41	38	42	146	108	31	1.00
23580	13786127	Q9H3Q1	CDC42EP4	CDC42 effector protein 4	1	1	54	52	60	58	224	123	43	1.00	15	15	21	15	66	201	26	1.00	25	32	26	29	112	129	36	1.00
51715	34485714	Q9ULC3	RAB23	RAB23, member RAS oncogene family	1	1	62	56	53	53	224	123	40	1.00	14	17	20	21	72	196	24	1.00	19	20	23	24	86	150	26	1.00
84886	14249478	Q9H425	C1orf198	chromosome 1 open reading frame 198	14	13	49	58	64	53	224	123	45	1.00	5	5	7	11	28	-	18		8	8	18	16	50	-	18
5584	133908623	P41743	PRKCI	protein kinase C, iota	4	2	53	60	52	58	223	124	33	1.00	22	33	31	31	117	158	28	1.00	23	21	24	20	88	148	27	1.00
5064	93141029	O75781	PALM	paralemmin	4	2	53	48	56	65	222	125	44	1.00	21	30	27	25	103	169	29	1.00	21	39	41	47	148	106	44	1.00
119	297307158	P35612	ADD2	adducin 2	5	3	65	56	51	49	221	126	56	1.00	30	35	36	36	137	144	53	1.00	46	53	65	59	223	71	65	1.00
1495	55770844	P35221	CTNNA1	catenin alpha 1	6	6	62	63	54	42	221	126	67	1.00	26	26	28	25	105	167	50	1.00	31	37	38	37	143	110	62	1.00
10163	11386183	Q9Y6W5	WASF2	WAS protein family member 2	6	6	57	60	52	52	221	126	28	1.00	11	9	7	11	38	-	17		21	24	24	22	91	145	19	1.00
6844	172072620	P63027	VAMP2	vesicle associated membrane protein 2	5	4	65	60	27	69	221	126	17	1.00	12	12	27	31	82	186	10	0.81	31	18	8	29	86	-	13
1267	94721261	P09543	CNP	2',3'-cyclic nucleotide 3' phosphodiesterase	4	4	55	54	65	46	220	127	60	1.00	26	25	20	28	99	173	35	1.00	18	19	22	25	84	152	34	1.00
9590	21493022	Q02952	AKAP12	A-kinase anchoring protein 12	12	11	65	50	45	59	219	128	77	1.00	65	58	77	81	281	76	108	1.00	84	98	126	127	435	21	125	1.00
375	4502201	P84077	ARF1	ADP ribosylation factor 1	15	13	54	51	58	53	216	129	16	1.00	46	48	38	42	174	118	14	0.98	16	31	43	43	133	-	15
6642	23111034	Q13596	SNX1	sorting nexin 1	17	16	52	55	49	59	215	130	56	1.00	56	47	49	48	200	104	56	1.00	31	44	50	48	173	-	57
2549	46370071	Q13480	GAB1	GRB2 associated binding protein 1	3	3	52	53	52	57	214	131	52	1.00	31	30	43	39	143	140	45	1.00	22	27	23	29	101	137	34	1.00
8417	170932494	O15400	STX7	syntaxin 7	4	3	50	56	49	58	213	132	32	1.00	18	15	12	14	59	207	19	0.99	18	27	27	27	99	139	26	1.00
9712	122937432	Q92738	USP6NL	USP6 N-terminal like	0	0	50	53	46	64	213	132	54	1.00	50	55	72	67	244	85	75	1.00	37	45	33	31	146	108	53	1.00
6059	108773782	P61221	ABCE1	ATP binding cassette subfamily E member 1	9	9	52	51	61	49	213	132	38	1.00	17	20	19	22	78	-	33		12	14	19	22	67	-	34
7879	34147513	P51149	RAB7A	RAB7A, member RAS oncogene family	4	4	55	51	55	51	212	133	34	1.00	25	23	39	31	118	157	36	1.00	29	28	37	42	136	112	37	1.00
7534	208973238	P63104	YWHAZ	tyrosine 3-monooxygenase/tryptophan 5-monooxygenase activation protein, zeta	8	7	59	50	55	46	210	134	24	1.00	8	7	13	10	38	-	14		18	29	26	27	100	138	22	0.80
6185	209413738	P04844	RPN2	ribophorin II	12	11	51	57	54	48	210	134	44	1.00	39	47	40	36	162	124	53	1.00	30	48	27	34	139	-	46
292	156071459	P05141	SLC25A5	solute carrier family 25 (mitochondrial carrier; adenine nucleotide translocator), member 5	16	15	52	54	51	53	210	134	38	1.00	53	27	30	38	148	-	20		37	40	34	34	145	-	27
10212	21040371	O00148	DDX39A	DEAD-box helicase 39A	19	17	58	46	49	56	209	135	52	0.87	32	25	36	35	128	-	43		44	45	44	43	176	-	45
8650	20070356	P49757	NUMB	numb homolog (Drosophila)	7	6	55	48	52	46	201	136	43	1.00	32	34	49	44	159	126	47	1.00	26	30	36	33	125	119	40	1.00
10006	296010983	Q8IZP0	ABI1	abl interactor 1	10	8	45	57	50	48	200	137	36	1.00	38	46	51	55	190	110	29	1.00	35	35	27	26	123	120	32	0.99
114787	112821681	Q7Z2K8	GPRIN1	G protein regulated inducer of neurite outgrowth 1	7	6	57	44	54	43	198	138	68	1.00	39	52	44	53	188	111	52	1.00	13	28	40	41	122	-	48
200894	292658834	Q3SXY8	ARL13B	ADP ribosylation factor like GTPase 13B	2	2	51	48	53	45	197	139	43	1.00	22	32	40	46	140	142	33	1.00	30	29	41	30	130	115	36	1.00
114299	290491128	Q8IXS6	PALM2	paralemmin 2	3	0	47	51	49	47	194	140	39	1.00	16	15	25	23	79	189	30	1.00	21	26	29	30	106	132	32	1.00
4082	153070260	P29966	MARCKS	myristoylated alanine-rich protein kinase C substrate	3	2	52	41	46	52	191	141	35	1.00	29	35	34	33	131	149	30	1.00	13	24	30	34	101	137	26	1.00
23673	28933465	Q86Y82	STX12	syntaxin 12	1	1	46	43	46	55	190	142	31	1.00	17	18	17	16	68	199	17	1.00	19	25	21	20	85	151	26	1.00
6542	258614003	P52569	SLC7A2	solute carrier family 7 (cationic amino acid transporter, y+ system), member 2	1	0	44	45	50	49	188	143	35	1.00	41	51	47	41	180	116	35	1.00	27	24	33	32	116	125	29	1.00
5709	25777612	O43242	PSMD3	proteasome 26S subunit, non-ATPase 3	14	13	55	40	48	45	188	143	58	1.00	27	24	41	36	128	-	50		28	35	29	29	121	-	51
392	4757766	Q07960	ARHGAP1	Rho GTPase activating protein 1	7	5	54	39	44	50	187	144	31	1.00	14	19	31	22	86	182	32	0.78	39	33	37	25	134	113	34	1.00
6526	110835708	P53794	SLC5A3	solute carrier family 5 (sodium/myo-inositol cotransporter), member 3	0	0	57	35	50	45	187	144	26	1.00	22	23	17	17	79	189	21	1.00	13	16	20	16	65	169	18	1.00
8573	186700629	O14936	CASK	calcium/calmodulin-dependent serine protein kinase (MAGUK family)	7	6	47	47	52	41	187	144	49	1.00	74	80	106	103	363	57	80	1.00	48	60	53	57	218	73	71	1.00
253260	59891448	Q6R327	RICTOR	RPTOR independent companion of MTOR, complex 2	3	3	46	54	48	39	187	144	56	1.00	53	49	68	68	238	89	102	1.00	30	44	56	53	183	88	92	1.00
28988	171906575	Q9UJU6	DBNL	drebrin-like	13	12	46	45	48	47	186	145	38	1.00	9	9	17	8	43	-	20		18	22	19	18	77	-	22
4733	4758796	Q9Y295	DRG1	developmentally regulated GTP binding protein 1	13	13	43	45	54	43	185	146	33	1.00	27	26	29	26	108	-	29		16	16	21	28	81	-	31
259217	119874213	O43301	HSPA12A	heat shock protein family A (Hsp70) member 12A	5	4	54	43	36	49	182	147	46	1.00	42	36	36	37	151	132	53	1.00	38	40	48	48	174	93	60	1.00
1362	22202611	O75976	CPD	carboxypeptidase D	4	2	36	48	53	45	182	147	60	1.00	38	36	53	44	171	120	75	1.00	62	88	82	92	324	41	97	1.00
51144	7705855	Q53GQ0	HSD17B12	hydroxysteroid (17-beta) dehydrogenase 12	8	6	43	49	43	47	182	147	30	1.00	38	32	37	39	146	137	29	1.00	17	18	16	15	66	-	20
4920	19743898	Q01974	ROR2	receptor tyrosine kinase-like orphan receptor 2	4	1	47	51	37	46	181	148	55	1.00	56	71	59	60	246	83	47	1.00	32	47	48	49	176	91	50	1.00
6455	4506929	Q99961	SH3GL1	SH3-domain GRB2-like 1	14	11	47	41	43	45	176	149	28	1.00	15	13	21	16	65	-	18		18	17	28	30	93	-	21
5894	4506401	P04049	RAF1	Raf-1 proto-oncogene, serine/threonine kinase	4	3	46	50	39	40	175	150	37	1.00	65	64	57	57	243	86	47	1.00	40	38	39	40	157	101	46	1.00
998	4757952	P60953	CDC42	cell division cycle 42	3	2	35	45	44	50	174	151	6	1.00	16	20	21	22	79	189	8	1.00	39	45	39	37	160	100	8	1.00
10723	123701900	Q9Y666	SLC12A7	solute carrier family 12 (potassium/chloride transporter), member 7	0	0	43	52	41	38	174	151	42	1.00	48	37	64	73	222	95	61	1.00	44	52	56	51	203	78	58	1.00
4175	7427519	Q14566	MCM6	minichromosome maintenance complex component 6	14	14	48	40	41	45	174	151	50	1.00	16	19	35	29	99	-	50		19	22	18	18	77	-	40
26505	40068047	Q8NE01	CNNM3	cyclin and CBS domain divalent metal cation transport mediator 3	0	0	42	38	48	45	173	152	54	1.00	33	44	42	41	160	125	55	1.00	38	40	23	28	129	116	43	1.00
92609	48526509	Q3ZCQ8	TIMM50	translocase of inner mitochondrial membrane 50 homolog (S. cerevisiae)	11	9	38	52	43	39	172	153	26	1.00	38	37	33	30	138	143	24	1.00	25	28	32	27	112	129	25	0.78
10135	5031977	P43490	NAMPT	nicotinamide phosphoribosyltransferase	13	12	41	36	48	47	172	153	51	1.00	58	55	43	39	195	107	60	1.00	21	26	24	19	90	-	41
10818	110347408	Q8WU20	FRS2	fibroblast growth factor receptor substrate 2	0	0	43	49	38	41	171	154	32	1.00	29	33	36	26	124	154	32	1.00	15	19	24	24	82	154	26	1.00
57669	40254949	Q9HCM4	EPB41L5	erythrocyte membrane protein band 4.1 like 5	5	4	41	49	38	42	170	155	33	1.00	33	32	62	54	181	115	52	1.00	51	59	60	53	223	71	56	1.00
2045	4758282	Q15375	EPHA7	EPH receptor A7	0	0	47	48	41	32	168	156	53	1.00	22	22	21	23	88	180	36	1.00	17	18	27	28	90	146	40	1.00
57181	187936949	Q9ULF5	SLC39A10	solute carrier family 39 (zinc transporter), member 10	0	0	45	38	49	36	168	156	44	1.00	52	42	44	46	184	114	40	1.00	35	31	41	41	148	106	42	1.00
11313	9966764	O95372	LYPLA2	lysophospholipase II	13	9	35	39	44	50	168	156	22	1.00	26	34	10	12	82	-	5		6	9	4	2	21	-	5
288	325053668	Q12955	ANK3	ankyrin 3, node of Ranvier (ankyrin G)	23	21	41	47	42	36	166	-	59		133	124	135	126	518	32	148	1.00	3	33	28	32	96	-	51
90861	21700763	Q9H910	HN1L	hematological and neurological expressed 1-like	17	13	37	43	44	42	166	157	27	0.78	24	20	25	22	91	-	22		13	18	26	25	82	-	23
51602	7706254	Q9Y2X3	NOP58	NOP58 ribonucleoprotein	15	13	45	39	37	44	165	158	28	0.95	7	9	10	12	38	-	25		11	8	11	16	46	-	23
54566	110624794	Q9H329	EPB41L4B	erythrocyte membrane protein band 4.1 like 4B	0	0	45	48	37	34	164	159	27	1.00	18	18	24	30	90	179	24	1.00	10	9	7	11	37	197	15	1.00
5337	194272176	Q13393	PLD1	phospholipase D1	0	0	45	40	39	40	164	159	45	1.00	16	18	29	23	86	182	43	1.00	23	28	28	26	105	133	49	1.00
57216	62955805	Q9ULK5	VANGL2	VANGL planar cell polarity protein 2	1	0	42	43	40	39	164	159	49	1.00	117	106	90	85	398	48	64	1.00	65	83	83	88	319	42	65	1.00
4233	188595716	P08581	MET	MET proto-oncogene, receptor tyrosine kinase	0	0	36	38	42	47	163	160	33	1.00	14	11	6	9	40	226	22	1.00	11	16	14	14	55	179	25	1.00
28956	7661728	Q9Y2Q5	LAMTOR2	late endosomal/lysosomal adaptor, MAPK and MTOR activator 2	1	0	33	44	48	38	163	160	25	1.00	5	3	3		11	-	6		19	19	30	21	89	147	19	1.00
509	50345988	P36542	ATP5C1	ATP synthase, H+ transporting, mitochondrial F1 complex, gamma polypeptide 1	9	8	40	43	38	39	160	161	30	1.00	37	39	35	43	154	129	30	1.00	28	31	35	38	132	114	25	1.00
10419	20070220	O14744	PRMT5	protein arginine methyltransferase 5	8	7	43	47	33	37	160	161	43	1.00	75	72	97	91	335	63	75	1.00	10	14	18	22	64	-	25
6305	239735519	O95248	SBF1	SET binding factor 1	2	0	40	38	42	39	159	162	58	1.00	28	30	38	47	143	140	76	1.00	36	36	38	45	155	102	72	1.00
151963	197333817	Q8IYB1	MB21D2	Mab-21 domain containing 2	5	5	48	33	38	40	159	162	30	1.00	25	35	11	15	86	-	29		12	16	10	11	49	-	20
11333	7657441	Q13442	PDAP1	PDGFA associated protein 1	10	9	35	35	41	48	159	162	24	1.00	15	12	26	22	75	-	16		13	23	18	22	76	-	20
5250	4505775	Q00325	SLC25A3	solute carrier family 25 (mitochondrial carrier; phosphate carrier), member 3	12	8	39	39	39	40	157	163	32	1.00	70	72	52	63	257	80	33	1.00	22	25	35	33	115	-	25
54888	39995082	Q08J23	NSUN2	NOP2/Sun RNA methyltransferase family member 2	13	12	44	36	37	40	157	163	32	1.00	25	25	23	18	91	-	41		26	23	21	21	91	-	41
8633	302058265	O95185	UNC5C	unc-5 netrin receptor C	0	0	48	34	37	37	156	164	38	1.00	10	8	21	17	56	210	23	1.00	20	22	22	18	82	154	28	1.00
5296	4826908	O00459	PIK3R2	phosphoinositide-3-kinase regulatory subunit 2	0	0	39	40	41	36	156	164	41	1.00	37	42	60	46	185	113	66	1.00	60	55	62	58	235	65	69	1.00
153562	289666784	Q8N4S9	MARVELD2	MARVEL domain containing 2	0	0	46	45	36	28	155	165	42	1.00	18	19	23	22	82	186	34	1.00	22	25	27	28	102	136	39	1.00
4851	148833508	P46531	NOTCH1	notch 1	0	0	39	43	43	30	155	165	37	1.00	34	33	52	39	158	127	63	1.00	31	46	36	42	155	102	51	1.00
1650	20070197	P39656	DDOST	dolichyl-diphosphooligosaccharide--protein glycosyltransferase subunit (non-catalytic)	6	6	39	30	43	43	155	165	36	1.00	17	16	27	20	80	188	31	0.88	20	22	14	16	72	-	20
23181	45827692	Q14689	DIP2A	disco interacting protein 2 homolog A	11	11	37	45	33	40	155	165	37	1.00	21	16	26	25	88	-	48			26	12	17	55	-	30
80223	289547524	Q6WKZ4	RAB11FIP1	RAB11 family interacting protein 1 (class I)	10	9	36	43	40	34	153	166	37	1.00	35	26	27	24	112	161	48	0.80	26	32	29	31	118	124	53	0.97
4771	32451486	P35240	NF2	neurofibromin 2 (merlin)	2	1	46	37	33	37	153	166	48	1.00	22	25	32		79	-	29		16	25	26	25	92	144	41	1.00
10409	30795231	P80723	BASP1	brain abundant membrane attached signal protein 1	2	2	34	41	39	38	152	167	26	1.00	6	8	15	14	43	223	22	0.91		13	15	13	41	-	14
22979	190684710	Q9Y2G0	EFR3B	EFR3 homolog B	0	0	34	43	42	31	150	168	51	1.00	34	31	46	47	158	127	66	1.00	25	30	34	40	129	116	57	1.00
5576	4758958	P13861	PRKAR2A	protein kinase, cAMP-dependent, regulatory subunit type II alpha	12	12	47	34	36	33	150	168	39	0.98	29	16	31	24	100	-	35		21	31	44	42	138	-	37
10015	22027538	Q8WUM4	PDCD6IP	programmed cell death 6 interacting protein	11	11	41	26	38	44	149	169	46	0.76	18	17	18	16	69	-	47		21	23	16	19	79	-	37
55255	42716287	Q9HAD4	WDR41	WD repeat domain 41	6	6	35	42	39	32	148	170	28	1.00	10	11	13	13	47	-	24		29	27	23	21	100	138	28	1.00
7419	208879465	Q9Y277	VDAC3	voltage-dependent anion channel 3	14	13	36	43	39	30	148	-	26		57	49	41	45	192	109	29	1.00	29	29	27	27	112	-	26
5754	15826840	Q13308	PTK7	protein tyrosine kinase 7 (inactive)	0	0	37	33	38	39	147	171	45	1.00	20	26	33	27	106	166	44	1.00	27	28	27	34	116	125	46	1.00
10294	5031741	O60884	DNAJA2	DnaJ heat shock protein family (Hsp40) member A2	10	8	41	34	37	33	145	172	26	1.00	12	14	15	12	53	-	25		23	22	33	33	111	-	20
483	4502281	P54709	ATP1B3	ATPase, Na+/K+ transporting, beta 3 polypeptide	1	1	41	31	40	32	144	173	20	1.00	29	17	25	20	91	178	19	1.00	21	20	22	21	84	152	19	1.00
7529	21328448	P31946	YWHAB	tyrosine 3-monooxygenase/tryptophan 5-monooxygenase activation protein, beta	5	4	35	41	33	35	144	173	23	1.00	4	3	17	12	36	-	12		20	18	34	28	100	138	18	1.00
23157	21361478	Q14141	SEPT6	septin 6	12	11	34	36	37	36	143	174	35	1.00	30	32	38	32	132	148	36	0.89	13	27	24	25	89	-	31
4001	5031877	P20700	LMNB1	lamin B1	13	11	39	38	35	31	143	174	48	0.89	22	16	26	26	90	-	44		16	17	25	21	79	-	36
10857	5729875	O00264	PGRMC1	progesterone receptor membrane component 1	11	11	37	33	39	34	143	174	18	1.00	10	5	6	7	28	-	12		16	20	30	31	97	-	20
5825	4506341	P28288	ABCD3	ATP binding cassette subfamily D member 3	14	14	42	35	35	30	142	-	36		94	105	106	92	397	49	62	1.00	45	52	65	59	221	72	61	1.00
6093	4885583	Q13464	ROCK1	Rho-associated, coiled-coil containing protein kinase 1	1	0	35	32	40	35	142	175	59	1.00	25	28	37	38	128	151	69	1.00	17	29	26	23	95	142	53	1.00
9520	158937236	P55786	NPEPPS	aminopeptidase puromycin sensitive	9	8	31	29	42	39	141	176	57	1.00	16	26	17	22	81	-	44		19	23	20	17	79	-	49
222584	61676089	Q5T0W9	FAM83B	family with sequence similarity 83 member B	0	0	34	32	37	33	136	177	47	1.00	43	44	61	68	216	97	85	1.00	18	30	36	32	116	125	60	1.00
85377	31324577	Q8N3F8	MICALL1	MICAL like 1	9	8	27	40	36	32	135	178	45	1.00	38	28	29	29	124	154	53	1.00	16	22	15	18	71	-	38
7385	50592988	P22695	UQCRC2	ubiquinol-cytochrome c reductase core protein II	15	14	30	30	35	39	134	-	38		53	61	48	47	209	101	45	1.00	30	37	21	24	112	-	29
115548	226371723	Q0JRZ9	FCHO2	FCH domain only 2	9	9	34	34	35	30	133	179	43	1.00	67	70	56	50	243	86	54	1.00	28	32	31	39	130	115	48	1.00
83700	328927055	Q9BX67	JAM3	junctional adhesion molecule 3	0	0	33	33	35	32	133	179	24	1.00	5	5	18	14	42	224	15	1.00	3	6	15	7	31	203	11	1.00
79180	20149675	Q96C19	EFHD2	EF-hand domain family member D2	13	10	32	39	32	30	133	179	33	0.89	16	19	15	22	72	-	22		12	14	13	15	54	-	21
219699	32261318	Q8IZJ1	UNC5B	unc-5 netrin receptor B	1	0	30	34	32	35	131	180	34	1.00	64	63	51	54	232	90	47	1.00	30	33	32	27	122	121	36	1.00
6643	23111038	O60749	SNX2	sorting nexin 2	8	7	26	43	31	31	131	180	41	1.00	19	16	18	23	76	-	36		12	15	17	16	60	-	31
9462	226958575	Q9UJF2	RASAL2	RAS protein activator like 2	0	0	37	36	35	21	129	181	52	1.00	43	44	48	51	186	112	77	1.00	37	41	49	60	187	86	80	1.00
6566	115583685	P53985	SLC16A1	solute carrier family 16 (monocarboxylate transporter), member 1	9	7	30	32	34	32	128	182	36	1.00	21	20	22	27	90	-	27		11	17	30	37	95	-	32
9221	148596949	Q14978	NOLC1	nucleolar and coiled-body phosphoprotein 1	10	8	29	34	27	38	128	182	18	1.00	18	10	11	8	47	-	20		3	5	6	2	16	-	12
55227	95113664	Q9BTT6	LRRC1	leucine rich repeat containing 1	0	0	37	28	35	27	127	183	34	1.00	14	13	28	25	80	188	19	1.00	8	21	20	17	66	168	21	1.00
6536	67782317	P48067	SLC6A9	solute carrier family 6 (neurotransmitter transporter, glycine), member 9	0	0	35	29	30	33	127	183	30	1.00	14	14	24	20	72	196	17	1.00	8	18	15	18	59	175	17	1.00
1434	29029559	P55060	CSE1L	CSE1 chromosome segregation 1-like (yeast)	17	16	28	30	34	34	126	-	45		29	29	27	19	104	-	47		50	46	49	50	195	81	74	1.00
23382	195539337	Q96HN2	AHCYL2	adenosylhomocysteinase-like 2	3	3	27	35	34	30	126	184	23	1.00	5	8	13	11	37	-	17		16	13	20	18	67	167	20	1.00
7532	21464101	P61981	YWHAG	tyrosine 3-monooxygenase/tryptophan 5-monooxygenase activation protein, gamma	6	5	30	33	28	35	126	184	19	1.00	9	6	19	15	49	-	15		11	14	20	18	63	-	14
949	132566684	Q8WTV0	SCARB1	scavenger receptor class B member 1	0	0	29	30	34	32	125	185	28	1.00	36	34	27	32	129	150	32	1.00	26	21	26	23	96	141	27	1.00
255252	194394161	Q8N9N7	LRRC57	leucine rich repeat containing 57	0	0	26	26	35	37	124	186	30	1.00	25	25	18	18	86	182	23	1.00	13	19	20	18	70	164	21	1.00
6814	118600975	O00186	STXBP3	syntaxin binding protein 3	1	0	38	30	27	28	123	187	42	1.00	17	17	21	24	79	189	30	1.00	20	19	23	25	87	149	38	1.00
23705	148664190	Q9BY67	CADM1	cell adhesion molecule 1	0	0	33	28	34	28	123	187	19	1.00	10	13	17	13	53	213	13	1.00	17	19	20	18	74	161	13	1.00
5062	32483399	Q13177	PAK2	p21 protein (Cdc42/Rac)-activated kinase 2	16	16	31	24	35	32	122	-	35		42	42	48	48	180	116	56	0.90	31	42	57	62	192	-	55
27236	71040092	P53367	ARFIP1	ADP ribosylation factor interacting protein 1	7	6	32	32	24	34	122	188	33	1.00	15	16	20	18	69	-	36		13	16	21	20	70	-	33
94081	23618867	Q9H9B4	SFXN1	sideroflexin 1	9	8	30	33	32	26	121	189	28	1.00	22	23	22	23	90	-	27		23	23	26	20	92	-	32
7289	21536436	O75386	TULP3	tubby like protein 3	0	0	34	27	32	27	120	190	28	1.00	18	19	15	17	69	198	23	1.00	13	11	17	18	59	175	24	1.00
24145	39995064	Q96RD7	PANX1	pannexin 1	0	0	31	31	38	20	120	190	24	1.00	9	13	15	9	46	220	17	1.00	25	30	32	26	113	128	23	1.00
1741	119943108	Q92796	DLG3	discs, large homolog 3 (Drosophila)	0	0	25	30	30	35	120	190	48	1.00	31	31	42	40	144	139	49	1.00	24	26	33	26	109	130	40	1.00
5792	109633039	P10586	PTPRF	protein tyrosine phosphatase, receptor type F	0	0	33	22	29	35	119	191	40	1.00	10	3	6	4	23	243	16	1.00	8	5	14	5	32	202	20	1.00
6573	34808710	P41440	SLC19A1	solute carrier family 19 (folate transporter), member 1	0	0	33	31	25	30	119	191	23	1.00	21	20	17	19	77	191	19	1.00	14	23	22	31	90	146	23	1.00
9847	29789060	Q86YS7	KIAA0528	C2 calcium-dependent domain containing 5	3	3	32	32	32	23	119	191	37	1.00	29	32	28	29	118	157	41	1.00	34	37	40	44	155	102	52	1.00
196527	218156299	Q4KMQ2	ANO6	anoctamin 6	0	0	30	34	22	33	119	191	38	1.00	11	9	12	15	47	219	23	1.00	19	19	20	22	80	156	30	1.00
51094	21361519	Q96A54	ADIPOR1	adiponectin receptor 1	0	0	27	31	29	31	118	192	17	1.00	9	13	14	12	48	218	12	1.00	8	11	5	2	26	208	10	0.99
5295	32455248	P27986	PIK3R1	phosphoinositide-3-kinase regulatory subunit 1	1	1	41	32	20	25	118	192	44	1.00	36	34	39	40	149	134	47	1.00	29	26	45	46	146	108	53	1.00
9019	4506357	O95297	MPZL1	myelin protein zero-like 1	0	0	30	25	32	31	118	192	20	1.00	26	29	29	32	116	159	18	1.00	4	8	16	15	43	191	16	1.00
55210	283436222	Q9NVI7	ATAD3A	ATPase family, AAA domain containing 3A	4	4	40	22	33	23	118	192	28	1.00	24	24	25	21	94	177	48	1.00	8	14	11	16	49	-	30
5361	262118282	Q9UIW2	PLXNA1	plexin A1	0	0	33	27	30	27	117	193	54	1.00	22	17	35	32	106	166	52	1.00	28	25	30	32	115	126	64	1.00
56993	9910382	Q9NS69	TOMM22	translocase of outer mitochondrial membrane 22 homolog (yeast)	8	8	27	33	31	26	117	193	21	1.00	41	40	38	29	148	135	20	1.00	39	36	28	24	127	118	21	1.00
57579	157671937	Q9P2D6	FAM135A	family with sequence similarity 135 member A	5	5	32	40	41	4	117	-	34		29	27	39	34	129	150	49	1.00	29	32	4	3	68	-	32
6507	169790839	P43003	SLC1A3	solute carrier family 1 (glial high affinity glutamate transporter), member 3	1	1	31	33	24	28	116	194	16	1.00	42	28	50	52	172	119	18	1.00	27	28	24	27	106	132	23	1.00
7037	189458817	P02786	TFRC	transferrin receptor	2	0	27	33	30	26	116	194	47	1.00	79	72	48	42	241	87	75	1.00	35	42	45	53	175	92	74	1.00
2665	6598323	P50395	GDI2	GDP dissociation inhibitor 2	4	2	24	18	37	36	115	195	32	1.00	9	6	7	8	30	-	17		13	15	10	9	47	187	20	0.93
84612	62955042	Q9BYG5	PARD6B	par-6 family cell polarity regulator beta	0	0	31	25	29	30	115	195	21	1.00	23	20	27	37	107	165	34	1.00	14	15	13	12	54	180	22	1.00
51248	7706025	Q5EBL8	PDZD11	PDZ domain containing 11	3	2	29	37	24	25	115	195	12	1.00	21	19	42	36	118	157	19	1.00	22	22	18	18	80	156	18	1.00
51678	21361598	Q9NZW5	MPP6	membrane protein, palmitoylated 6	1	0	25	27	27	36	115	195	34	1.00	13	12	13	11	49	217	28	1.00	13	12	18	16	59	175	34	1.00
55714	122937400	Q9P273	ODZ3	teneurin transmembrane protein 3	0	0	25	37	27	25	114	196	51	1.00	65	79	57	57	258	79	110	1.00	46	48	72	69	235	65	116	1.00
10165	237649019	Q9UJS0	SLC25A13	solute carrier family 25 (aspartate/glutamate carrier), member 13	10	9	34	27	26	26	113	197	52	0.93	32	35	24	20	111	-	42		26	24	19	16	85	-	39
381	4502209	P84085	ARF5	ADP ribosylation factor 5	5	4	29	24	30	30	113	197	12	1.00			16	22	38	-	4		2	15	21	20	58	-	9
10493	18379349	Q99536	VAT1	vesicle amine transport 1	2	1	23	30	32	27	112	198	29	1.00	15	11	11	12	49	217	16	1.00	7	11	11	16	45	189	23	0.99
6616	18765733	P60880	SNAP25	synaptosome associated protein 25kDa	0	0	29	30	23	30	112	198	31	1.00	8	4	10	10	32	234	16	1.00	9	11	17	19	56	178	24	1.00
4684	115529482	P13591	NCAM1	neural cell adhesion molecule 1	0	0	27	34	25	26	112	198	37	1.00	16	16	18	15	65	202	34	1.00	18	17	28	28	91	145	34	1.00
8140	71979932	Q01650	SLC7A5	solute carrier family 7 (amino acid transporter light chain, L system), member 5	2	1	27	33	28	24	112	198	20	1.00	11	17	16	16	60	206	17	1.00	9	14	22	18	63	171	12	1.00
5127	197333744	Q00536	CDK16	cyclin-dependent kinase 16	8	5	28	31	29	24	112	198	39	1.00	18	25	29	29	101	171	41	0.96	15	18	9	15	57	-	31
1499	148227672	P35222	CTNNB1	catenin beta 1	0	0	38	27	22	22	109	199	26	1.00	28	28	17	23	96	175	25	1.00	16	16	20	18	70	164	20	1.00
10228	5032131	O43752	STX6	syntaxin 6	0	0	33	24	34	18	109	199	19	1.00	3	4	13	6	26	240	14	1.00	6	17	9	6	38	196	20	1.00
91942	29789409	Q8N183	NDUFAF2	NADH:ubiquinone oxidoreductase complex assembly factor 2	0	0	31	28	23	27	109	199	20	1.00	6	5	10	7	28	238	13	1.00	11	8	6	9	34	200	12	1.00
369	4502193	P10398	ARAF	A-Raf proto-oncogene, serine/threonine kinase	2	2	25	25	32	27	109	199	24	1.00	15	12	22	25	74	194	25	1.00	17	13	14	14	58	176	26	1.00
6461	106879210	Q15464	SHB	Src homology 2 domain containing adaptor protein B	1	0	25	28	27	29	109	199	41	1.00	9	7	17	16	49	217	23	1.00	12	14	21	21	68	166	35	1.00
9230	190358517	Q15907	RAB11B	RAB11B, member RAS oncogene family	4	3	2	34	34	39	109	-	29		18	12	1	1	32	-	15		19	22	27	28	96	141	35	1.00
10067	16445419	O14828	SCAMP3	secretory carrier membrane protein 3	4	3	30	26	28	24	108	200	24	1.00	14	19	15	14	62	205	17	1.00	11	10	17	16	54	180	21	0.91
5297	348041302	P42356	PI4KA	phosphatidylinositol 4-kinase, catalytic, alpha	4	4	35	16	25	32	108	200	42	1.00	40	40	43	40	163	123	92	1.00	22	44	34	42	142	111	75	1.00
322	22035554	O00213	APBB1	amyloid beta (A4) precursor protein-binding, family B, member 1 (Fe65)	8	6	28	27	22	31	108	200	25	1.00	15	13	30	25	83	-	34		12	20	18	20	70	-	26
3939	260099723	P00338	LDHA	lactate dehydrogenase A	4	4	27	24	28	29	108	200	23	1.00	11	10	8	11	40	-	22		8	9	8	10	35	-	20
10755	42544140	O14908	GIPC1	GIPC PDZ domain containing family member 1	8	6	24	23	27	34	108	200	27	1.00	8	7	9	6	30	-	14		7	9	10	12	38	-	17
5214	11321601	Q01813	PFKP	phosphofructokinase, platelet	8	7	24	27	28	28	107	201	34	1.00	29	27	40	35	131	149	42	1.00	22	20	23	21	86	150	39	0.89
493	48255957	P23634	ATP2B4	ATPase, Ca++ transporting, plasma membrane 4	0	0	46	24	20	17	107	201	30	1.00	6	7	13	9	35	231	21	1.00	7	11	5	10	33	201	19	1.00
9040	4507791	P61081	UBE2M	ubiquitin conjugating enzyme E2M	3	2	22	28	36	21	107	201	17	1.00	5	3	2		10	-	4		5	6	7	5	23	-	9
7533	4507951	Q04917	YWHAH	tyrosine 3-monooxygenase/tryptophan 5-monooxygenase activation protein, eta	5	5	22	28	27	30	107	201	22	1.00	2	2	4	5	13	-	9		6	8	11	12	37	-	15
396	297374782	P52565	ARHGDIA	Rho GDP dissociation inhibitor (GDI) alpha	4	4	27	24	28	27	106	202	18	1.00	11	10	9	13	43	-	15		13	17	18	16	64	170	18	0.99
293	156071462	P12236	SLC25A6	solute carrier family 25 (mitochondrial carrier; adenine nucleotide translocator), member 6	4	4	34	19	25	28	106	202	18	1.00	33	49	28	27	137	144	18	1.00	19	24	21	22	86	150	14	1.00
1949	4503489	Q15768	EFNB3	ephrin-B3	0	0	23	26	27	29	105	203	21	1.00	7	6	14	15	42	224	18	1.00	8	9	7	12	36	198	10	1.00
8677	4507285	O60499	STX10	syntaxin 10	1	0	29	22	27	26	104	204	24	1.00	10	7	13	18	48	218	18	1.00	13	11	18	18	60	174	21	1.00
85440	54112429	Q96N67	DOCK7	dedicator of cytokinesis 7	12	11	24	27	24	28	103	-	55		48	48	38	37	171	120	93	1.00	20	24	28	27	99	-	56
10160	5031633	Q9Y4F1	FARP1	FERM, ARH/RhoGEF and pleckstrin domain protein 1	3	3	27	23	28	24	102	205	35	1.00	27	21	28	33	109	163	39	1.00	27	29	46	44	146	108	48	1.00
56288	21361831	Q8TEW0	PARD3	par-3 family cell polarity regulator	7	6	34	27	20	21	102	205	45	0.99	32	6	32	6	76	-	37		6	36	35	35	112	-	57
22907	20336290	Q7L2E3	DHX30	DEAH-box helicase 30	5	4	32	21	27	22	102	205	26	1.00	8	9	15	14	46	-	28		14	13	8	9	44	-	27
10057	66529005	O15440	ABCC5	ATP binding cassette subfamily C member 5	1	0	22	29	25	25	101	206	35	1.00	10	15	22	23	70	197	33	1.00	24	21	29	22	96	141	41	1.00
7074	115583670	Q13009	TIAM1	T-cell lymphoma invasion and metastasis 1	0	0	28	29	26	17	100	207	42	1.00	9	4	16	16	45	221	30	1.00	14	15	21	23	73	162	32	1.00
8724	4507143	O60493	SNX3	sorting nexin 3	2	1	21	24	26	28	99	208	21	1.00	9	9	11	10	39	227	19	0.99	7	9	6	9	31	203	14	0.97
2182	12669909	O60488	ACSL4	acyl-CoA synthetase long-chain family member 4	2	0	26	21	30	22	99	208	32	1.00	10	10	9	9	38	228	21	0.99	11	10	14	19	54	180	23	1.00
2030	118582260	Q99808	SLC29A1	solute carrier family 29 (equilibrative nucleoside transporter), member 1	0	0	23	27	22	27	99	208	19	1.00	38	32	32	31	133	147	19	1.00	18	14	21	25	78	158	16	1.00
65108	13491174	P49006	MARCKSL1	MARCKS-like 1	0	0	26	20	27	26	99	208	17	1.00	5	1	7	4	17	-	10		12	19	13	20	64	170	11	1.00
23011	7661922	Q9UL25	RAB21	RAB21, member RAS oncogene family	5	4	22	23	31	23	99	208	22	1.00	6	4	8	11	29	-	14		8	6	10	9	33	-	14
22841	7662394	Q7L804	RAB11FIP2	RAB11 family interacting protein 2 (class I)	2	1	24	23	28	23	98	209	22	1.00			8	5	13	-	5			3	1	2	6	-	6
6845	5032137	P51809	VAMP7	vesicle associated membrane protein 7	0	0	29	26	16	27	98	209	29	1.00	9	12	12	14	47	219	15	1.00	15	20	17	16	68	166	22	1.00
6282	5032057	P31949	S100A11	S100 calcium binding protein A11	4	3	28	20	24	25	97	210	8	1.00					0	-	0		2	3			5	-	2
23048	38524622	Q96RU3	FNBP1	formin binding protein 1	3	3	23	23	24	26	96	211	35	1.00	13	8	13	15	49	217	24	0.88	18	24	26	32	100	138	37	1.00
10529	47087157	O76041	NEBL	nebulette	10	6	24	24	24	24	96	211	21	0.99	1	2	5	4	12	-	8		3	6	7	10	26	-	12
9688	208609990	Q8N1F7	NUP93	nucleoporin 93kDa	6	5	16	29	22	28	95	212	37	0.98	14	17	20	21	72	196	40	0.85	8	15	19	15	57	-	36
9050	165905601	Q9H939	PSTPIP2	proline-serine-threonine phosphatase interacting protein 2	6	4	26	18	25	25	94	213	26	1.00	7	7	8	8	30	-	23		19	17	13	16	65	169	21	0.87
30844	21264315	Q9H223	EHD4	EH domain containing 4	2	1	19	31	20	24	94	213	37	1.00	17	7	16	14	54	212	26	0.99	22	25	21	17	85	151	41	1.00
2042	21361241	P29320	EPHA3	EPH receptor A3	0	0	28	20	22	24	94	213	26	1.00	22	23	20	22	87	181	37	1.00	18	20	19	23	80	156	33	1.00
253832	49457851	Q5W0Z9	ZDHHC20	zinc finger, DHHC-type containing 20	0	0	17	24	27	26	94	213	23	1.00	4	5	9	9	27	239	11	1.00	5	5	6	10	26	208	12	1.00
64854	197116355	P62068	USP46	ubiquitin specific peptidase 46	0	0	23	19	24	27	93	214	17	1.00	15	10	11	11	47	219	18	1.00	9	9	6	7	31	203	12	1.00
5318	148664186	Q99959	PKP2	plakophilin 2	3	2	18	25	29	21	93	214	42	1.00	14	14	24	18	70	197	39	1.00	17	25	32	26	100	138	41	1.00
57584	203097003	Q5T5U3	ARHGAP21	Rho GTPase activating protein 21	9	6	22	29	21	20	92	215	42	0.89	47	55	51	56	209	101	77	1.00	21	25	39	35	120	122	66	0.97
157769	84000432	Q658Y4	FAM91A1	family with sequence similarity 91 member A1	10	9	27	23	20	22	92	-	24		42	54	69	64	229	92	57	1.00	77	85	85	79	326	40	66	1.00
5218	6912584	O94921	CDK14	cyclin-dependent kinase 14	0	0	20	24	26	22	92	215	18	1.00	4	1	3	4	12	-	10		9	6	7	7	29	205	13	1.00
255057	393794759	Q8N350	C19orf26	calcium channel, voltage-dependent, beta subunit associated regulatory protein	0	0	28	16	25	22	91	216	19	1.00	65	61	46	55	227	93	33	1.00	26	26	37	33	122	121	25	1.00
55824	63054864	Q9NWQ8	PAG1	phosphoprotein membrane anchor with glycosphingolipid microdomains 1	0	0	26	26	21	18	91	216	26	1.00	7	5	14	18	44	222	26	1.00	10	12	15	19	56	178	20	1.00
65082	18105056	Q96AX1	VPS33A	VPS33A, CORVET/HOPS core subunit	3	2	21	24	25	21	91	216	29	1.00	1		1		2	-	2		5	8	6	5	24	-	16
9319	11321607	Q15645	TRIP13	thyroid hormone receptor interactor 13	8	5	28	24	18	21	91	216	31	0.95	14	19	24	27	84	-	38		14	21	13	12	60	-	34
81539	117168275	Q9H2H9	SLC38A1	solute carrier family 38 member 1	0	0	26	18	21	25	90	217	18	1.00	22	29	16	13	80	188	20	1.00	10	9	23	20	62	172	17	1.00
6712	5902122	O15020	SPTBN2	spectrin, beta, non-erythrocytic 2	0	0	26	21	21	22	90	217	49	1.00	13	12	21	21	67	200	45	1.00	20	27	51	49	147	107	84	1.00
821	10716563	P27824	CANX	calnexin	7	7	24	22	25	19	90	217	24	0.94	11	9	17	14	51	-	20		22	24	22	29	97	140	32	1.00
79643	31542673	Q96FZ7	CHMP6	charged multivesicular body protein 6	0	0	18	27	23	22	90	217	15	1.00	2	2	3	2	9	257	7	0.98		3	4	4	11	-	6
8775	47933379	P54920	NAPA	NSF attachment protein alpha	0	0	24	22	23	20	89	218	26	1.00	3	5	10	8	26	240	14	1.00	3	4	5	5	17	217	15	1.00
1956	29725609	P00533	EGFR	epidermal growth factor receptor	0	0	21	20	26	22	89	218	29	1.00	21	27	19	18	85	183	32	1.00	21	30	27	29	107	131	33	1.00
8454	32307161	Q13616	CUL1	cullin 1	6	5	19	24	23	23	89	218	29	1.00	5	7	10	7	29	-	22		5	7	5	10	27	-	20
50848	8393638	Q9Y624	F11R	F11 receptor	0	0	22	18	25	23	88	219	17	1.00	18	17	4	10	49	217	10	1.00	2	4	4	7	17	217	9	0.99
2011	254028234	Q7KZI7	MARK2	MAP/microtubule affinity-regulating kinase 2	3	1	5	9	66	8	88	219	17	0.90	4	71	67	21	163	123	41	0.88	12	41	44	46	143	110	47	1.00
9950	30260188	Q8TBA6	GOLGA5	golgin A5	11	11	23	21	25	19	88	-	36		93	95	103	107	398	48	94	1.00	21	20	21	25	87	-	44
221061	63025206	Q5VUB5	FAM171A1	family with sequence similarity 171 member A1	3	1	33	11	23	20	87	220	30	0.99	25	27	30	26	108	164	52	1.00	16	20	24	15	75	160	37	1.00
91833	31317274	Q8TBZ3	WDR20	WD repeat domain 20	1	0	23	23	21	20	87	220	17	1.00	8	13	17	12	50	216	16	1.00	8	11	7	9	35	199	11	1.00
4722	4758788	O75489	NDUFS3	NADH:ubiquinone oxidoreductase core subunit S3	5	3	20	12	25	29	86	221	15	0.97	6	4	9	5	24	-	15		18	17	12	10	57	177	23	0.81
481	4502277	P05026	ATP1B1	ATPase, Na+/K+ transporting, beta 1 polypeptide	0	0	29	17	20	20	86	221	25	1.00	12	13	8	14	47	219	18	1.00	7	10	9	8	34	200	10	1.00
6812	4507297	P61764	STXBP1	syntaxin binding protein 1	1	0	17	25	25	19	86	221	34	1.00	8	4	9	5	26	240	19	1.00	7	10	5	4	26	208	16	1.00
1738	91199540	P09622	DLD	dihydrolipoamide dehydrogenase	4	3	23	17	24	21	85	222	21	1.00	5	2	11	8	26	-	15		2	7	5	3	17	-	10
57048	31543417	Q9NRY6	PLSCR3	phospholipid scramblase 3	0	0	22	22	22	18	84	223	16	1.00			1	1	2	-	2		7	7	7	7	28	-	4	1.00
5216	4826898	P07737	PFN1	profilin 1	5	4	19	23	18	24	84	223	12	1.00	9	12	12	11	44	-	16		10	9	13	8	40	-	14
83874	13994322	Q9BXI6	TBC1D10A	TBC1 domain family member 10A	0	0	23	19	21	20	83	224	22	1.00	5	5	4	6	20	246	13	1.00	9	12	7	10	38	196	17	1.00
23167	154146218	Q14156	EFR3A	EFR3 homolog A	1	1	20	18	27	18	83	224	29	1.00	19	16	27	21	83	185	41	1.00	19	21	19	19	78	158	32	1.00
4363	134142337	P33527	ABCC1	ATP binding cassette subfamily C member 1	0	0	17	23	24	19	83	224	36	1.00	26	25	38	34	123	155	61	1.00	32	36	41	40	149	105	76	1.00
9253	10863899	Q9Y6R0	NUMBL	numb homolog (Drosophila)-like	8	8	18	23	15	27	83	-	22		25	20	23	27	95	176	37	0.82	14	12	16	17	59	-	24
79834	148368962	Q9H792	PEAK1	pseudopodium-enriched atypical kinase 1	4	3	20	29	14	19	82	225	34	1.00	28	26	27	34	115	160	62	1.00	12	22	17	13	64	170	36	0.99
8502	53829374	Q99569	PKP4	plakophilin 4	0	0	26	18	18	20	82	225	27	1.00	37	39	33	36	145	138	64	1.00	30	36	25	28	119	123	55	1.00
2673	205277386	Q06210	GFPT1	glutamine--fructose-6-phosphate transaminase 1	4	4	22	18	26	16	82	225	27	1.00	16	16	13	11	56	210	29	0.91	8	11	15	19	53	-	31
160	19913416	O95782	AP2A1	adaptor related protein complex 2 alpha 1 subunit	8	7	17	29	21	14	81	-	23		24	22	18	17	81	-	36		19	20	25	26	90	146	37	0.78
3843	24797086	O00410	IPO5	importin 5	14	12	13	16	25	27	81	-	25		11	6	9	7	33	-	23		56	57	33	43	189	85	64	0.85
11188	66472382	Q9Y2I1	NISCH	nischarin	2	1	28	20	17	16	81	226	27	1.00	36	36	47	37	156	128	63	1.00	36	38	52	43	169	97	73	1.00
23516	190358541	Q15043	SLC39A14	solute carrier family 39 (zinc transporter), member 14	1	1	17	22	22	20	81	226	12	1.00	16	15	11	11	53	213	8	1.00	5	15	6	9	35	199	10	1.00
55004	8923579	Q6IAA8	LAMTOR1	late endosomal/lysosomal adaptor, MAPK and MTOR activator 1	2	2	19	23	17	21	80	227	26	1.00	6	9	13	10	38	228	19	0.92	13	15	12	12	52	182	23	1.00
2010	4557553	P50402	EMD	emerin	11	10	23	19	19	19	80	-	23		43	38	37	44	162	124	31	1.00	24	34	42	43	143	-	36
4942	4557809	P04181	OAT	ornithine aminotransferase	3	3	20	27	19	13	79	228	28	1.00	5	9	12	8	34	-	23		12	9	8	10	39	195	23	0.82
94121	193804860	Q96C24	SYTL4	synaptotagmin like 4	0	0	24	17	17	21	79	228	29	1.00	13	12	9	13	47	219	31	1.00	9	9	10	13	41	193	25	1.00
123036	190610018	Q8N9U0	TC2N	tandem C2 domains, nuclear	0	0	20	24	18	17	79	228	24	1.00	4	8	8	8	28	238	20	1.00	6	7	8	7	28	206	18	1.00
10938	30240932	Q9H4M9	EHD1	EH domain containing 1	1	0	18	17	22	22	79	228	26	1.00	8	7	14	12	41	225	26	1.00	18	22	16	18	74	161	35	1.00
58	4501881	P68133	ACTA1	actin, alpha 1, skeletal muscle	5	4	17	24	20	18	79	-	4	1.00	13	12	19	18	62	205	5	0.86			12	12	24	-	3
56704	21735575	Q9HDC5	JPH1	junctophilin 1	2	2	32	18	14	14	78	229	29	1.00	18	17	19	20	74	194	29	1.00	11	16	24	22	73	162	28	1.00
9351	194018553	Q15599	SLC9A3R2	solute carrier family 9, subfamily A (NHE3, cation proton antiporter 3), member 3 regulator 2	0	0	21	21	20	15	77	230	20	1.00	3	2	9	13	27	239	14	0.99	6	11	14	13	44	190	19	1.00
10424	291621647	O15173	PGRMC2	progesterone receptor membrane component 2	12	11	24	16	16	21	77	-	19		34	39	42	37	152	131	28	1.00	35	43	44	44	166	98	28	1.00
10525	195976805	Q9Y4L1	HYOU1	hypoxia up-regulated 1	4	3	27	15	18	17	77	230	23	1.00	3	6	3	3	15	-	11		8	9	7	6	30	-	21
100287932	5454122	O14925	TIMM23	translocase of inner mitochondrial membrane 23 homolog (yeast)	6	3	14	20	21	22	77	230	17	0.99	6	7	3	4	20	-	11		6	14	7	6	33	-	15
26056	24308075	Q9BXF6	RAB11FIP5	RAB11 family interacting protein 5 (class I)	5	4	21	16	22	17	76	231	27	1.00	14	13	12	8	47	-	21		10	18	17	19	64	170	25	0.78
9448	22035606	O95819	MAP4K4	mitogen-activated protein kinase kinase kinase kinase 4	4	3	15	18	23	20	76	231	32	1.00	17	17	29	4	67	-	34		11	14	17	25	67	167	31	0.98
8301	332635087	Q13492	PICALM	phosphatidylinositol binding clathrin assembly protein	6	5	22	21	14	19	76	231	23	0.86	13	15	13	13	54	-	16		9	8	10	10	37	-	20
126567	210147453	Q8TF44	C2CD4C	C2 calcium-dependent domain containing 4C	0	0	18	24	20	13	75	232	27	1.00	17	20	21	24	82	186	24	1.00	11	19	12	8	50	184	26	1.00
857	15451856	Q03135	CAV1	caveolin 1	1	0	17	18	17	23	75	232	15	1.00	7	7	12	10	36	230	8	1.00	8	11	13	6	38	196	7	1.00
6092	193083163	Q9HCK4	ROBO2	roundabout guidance receptor 2	0	0	15	23	19	18	75	232	33	1.00	19	23	21	21	84	184	44	1.00	15	23	19	22	79	157	40	1.00
382	4502211	P62330	ARF6	ADP ribosylation factor 6	4	4	18	16	22	19	75	232	17	1.00	13	15	11	10	49	-	16		7	8	11	10	36	-	17
26000	167614488	Q4KMP7	TBC1D10B	TBC1 domain family member 10B	3	1	20	17	16	21	74	233	26	1.00	28	19	16	25	88	180	33	1.00	15	16	10	12	53	181	24	0.98
6091	224994173	Q9Y6N7	ROBO1	roundabout guidance receptor 1	0	0	17	21	16	20	74	233	34	1.00	21	20	23	24	88	180	46	1.00	10	16	14	14	54	180	32	1.00
682	38372919	P35613	BSG	basigin (Ok blood group)	2	2	17	21	22	14	74	233	8	1.00	3	4	6	7	20	-	4		18	2	4	4	28	-	8
5793	194097398	P23470	PTPRG	protein tyrosine phosphatase, receptor type G	0	0	21	21	18	13	73	234	31	1.00	42	49	41	45	177	117	68	1.00	32	37	43	40	152	104	61	1.00
1466	4503101	Q16527	CSRP2	cysteine and glycine rich protein 2	4	3	17	19	16	21	73	234	21	1.00	18	15	14	10	57	209	13	0.93	4	3	7	8	22	-	11
29927	7019415	P61619	SEC61A1	Sec61 translocon alpha 1 subunit	3	3	17	13	25	18	73	234	18	1.00	3				3	-	2		2		6	4	12	-	6
5111	33239451	P12004	PCNA	proliferating cell nuclear antigen	4	3	16	14	19	24	73	234	16	1.00	8	7	8	8	31	-	14		7	8	11	12	38	-	14
58533	88703041	Q9UNH7	SNX6	sorting nexin 6	5	3	10	19	27	17	73	234	27	0.84	1	1	5	5	12	-	6		6	5	8	6	25	-	16
64121	11995472	Q9HB90	RRAGC	Ras-related GTP binding C	5	4	23		22	27	72	-	20		5		8	6	19	-	11		13	13	16	15	57	177	25	0.91
100526740	311893396	G3V325	ATP5J2-PTCD1	ATP5J2-PTCD1 readthrough	2	2	19	18	17	18	72	235	8	1.00	20	15	16	15	66	201	9	1.00	12	10	10	9	41	193	8	0.99
261729	100913194	Q8NFT2	STEAP2	STEAP2 metalloreductase	0	0	17	16	22	17	72	235	24	1.00	5	2	8	8	23	243	13	0.99	12	12	17	13	54	180	22	1.00
4720	260898743	O75306	NDUFS2	NADH:ubiquinone oxidoreductase core subunit S2	1	1	16	23	17	16	72	235	20	1.00	6	8	11	7	32	234	20	1.00	10	7	7	10	34	200	22	1.00
23043	239735580	Q9UKE5	TNIK	TRAF2 and NCK interacting kinase	6	4	20	17	15	19	71	236	26	0.98	31	35	3	3	72	-	25		14	23	28	24	89	147	39	0.95
3321	55953133	O75054	IGSF3	immunoglobulin superfamily member 3	0	0	18	25	16	12	71	236	31	1.00	25	26	40	32	123	155	60	1.00	19	19	19	23	80	156	44	1.00
4012	61742775	Q9UIQ6	LNPEP	leucyl/cystinyl aminopeptidase	1	1	17	17	19	18	71	236	32	1.00	20	25	23	18	86	182	43	1.00	22	28	37	41	128	117	64	1.00
3703	22749415	P46977	STT3A	STT3A, subunit of the oligosaccharyltransferase complex (catalytic)	4	4	16	18	19	18	71	236	23	1.00	16	15	14	14	59	207	20	0.99	10	12	7	8	37	-	17
1265	41327730	Q99439	CNN2	calponin 2	7	5	20	16	19	16	71	236	12	0.82	9	6	3	5	23	-	12		4	4	5	5	18	-	9
10670	5729999	Q7L523	RRAGA	Ras-related GTP binding A	2	0	13	19	17	21	70	237	14	1.00					0	-	0						0	-	0
2059	56682953	Q12929	EPS8	epidermal growth factor receptor pathway substrate 8	1	1	14	16	19	21	70	237	32	1.00	10	6	10	9	35	231	24	1.00	14	11	8	7	40	194	28	1.00
6541	4507047	P30825	SLC7A1	solute carrier family 7 (cationic amino acid transporter, y+ system), member 1	1	0	19	14	16	21	70	237	18	1.00			14	14	28	-	4		5	11	6	7	29	205	7	1.00
2181	42794752	O95573	ACSL3	acyl-CoA synthetase long-chain family member 3	7	4	14	20	18	17	69	238	20	0.85	11	14	9	9	43	-	21		14	16	17	18	65	169	24	0.82
1452	68303572	P48729	CSNK1A1	casein kinase 1, alpha 1	6	6	16	15	20	17	68	-	16		41	36	31	32	140	142	36	1.00	21	22	23	17	83	153	25	0.97
3927	5453710	Q14847	LASP1	LIM and SH3 protein 1	3	3	14	20	19	15	68	239	17	1.00		1	2	1	4	-	4			2		1	3	-	3
57556	11991660	Q9H2E6	SEMA6A	sema domain, transmembrane domain (TM), and cytoplasmic domain, (semaphorin) 6A	0	0	15	12	21	20	68	239	16	1.00	11	13	14	13	51	215	25	1.00	12	12	9	17	50	184	29	1.00
1073	14719392	Q9Y281	CFL2	cofilin 2 (muscle)	5	5	15	17	16	20	68	239	14	0.97					0	-	0		6	6	17	15	44	-	12
9524	24475816	Q9NZ01	TECR	trans-2,3-enoyl-CoA reductase	4	4	14	16	20	18	68	239	22	1.00	11	10	15	15	51	-	17		5	5	9	11	30	-	15
57446	14165266	Q9UGV2	NDRG3	NDRG family member 3	2	2	22	13	12	20	67	240	27	1.00	14	13	23	20	70	197	27	1.00	13	13	12	16	54	180	24	1.00
79084	13129110	Q9BQA1	WDR77	WD repeat domain 77	6	6	20	14	20	12	66	-	19		71	78	85	78	312	69	30	1.00	17	18	17	16	68	166	26	0.84
8394	208431778	Q99755	PIP5K1A	phosphatidylinositol-4-phosphate 5-kinase, type I, alpha	2	2	17	16	18	15	66	241	24	1.00	18	14	24	21	77	191	31	1.00	10	13	10	9	42	192	18	0.99
8673	14043026	Q9BV40	VAMP8	vesicle associated membrane protein 8	1	1	14	16	16	20	66	241	22	1.00	5	5	9	7	26	240	13	1.00	2	2	7	7	18	216	11	0.99
145567	60685231	Q86TV6	TTC7B	tetratricopeptide repeat domain 7B	1	1	21	14	17	14	66	241	21	1.00	20	23	25	23	91	178	42	1.00	16	14	14	16	60	174	27	1.00
5604	5579478	Q02750	MAP2K1	mitogen-activated protein kinase kinase 1	4	3	13	17	17	19	66	241	17	1.00	22	13	12	16	63	204	34	0.99	3	6	7	9	25	-	16
9367	305855090	P51151	RAB9A	RAB9A, member RAS oncogene family	3	3	17	12	22	15	66	241	17	1.00	6	7	5	7	25	-	12		8	8	11	10	37	-	18
7804	61744471	Q14114	LRP8	LDL receptor related protein 8	0	0	17	17	17	14	65	242	20	1.00	10	16	13	13	52	214	23	1.00	11	12	21	13	57	177	26	1.00
4704	6681764	Q16795	NDUFA9	NADH:ubiquinone oxidoreductase subunit A9	5	4	15	17	17	16	65	242	23	0.99	14	16	15	13	58	208	23	0.94	8	9	10	11	38	-	19
116841	224465202	Q5SQN1	SNAP47	synaptosome associated protein 47kDa	3	2	21	13	11	19	64	243	30	1.00	12	14	13	17	56	210	34	1.00	19	20	21	16	76	159	32	1.00
109	148536830	O60266	ADCY3	adenylate cyclase 3	0	0	13	23	16	12	64	243	16	1.00	5	3	8	8	24	242	19	1.00	10	10	9	5	34	200	15	1.00
421	4502247	O00192	ARVCF	armadillo repeat gene deleted in velocardiofacial syndrome	0	0	12	19	15	18	64	243	28	1.00	10	10	21	11	52	214	28	1.00	20	16	16	15	67	167	36	1.00
5577	47132585	P31323	PRKAR2B	protein kinase, cAMP-dependent, regulatory subunit type II beta	6	5	16	14	18	16	64	243	20	0.80	16	27	16	13	72	-	30		32	30	33	33	128	117	43	1.00
137392	150170658	A1XBS5	FAM92A1	family with sequence similarity 92 member A1	0	0	14	12	18	19	63	244	15	1.00	8	8	11	10	37	229	17	1.00	7	2	10	9	28	206	11	0.99
9158	38683849	O43427	FIBP	fibroblast growth factor (acidic) intracellular binding protein	4	3	15	17	12	19	63	244	21	0.99	26	23	27	28	104	168	33	1.00	24	29	32	29	114	127	36	1.00
5868	19923262	P20339	RAB5A	RAB5A, member RAS oncogene family	3	2	15	16	18	13	62	245	20	1.00	9	12	4	8	33	-	13		8	9	11	8	36	198	13	0.91
51719	195927020	Q9Y376	CAB39	calcium binding protein 39	0	0	18	10	13	21	62	245	18	1.00	20	22	12	14	68	199	21	1.00	14	18	12	11	55	179	23	1.00
6584	4507005	O76082	SLC22A5	solute carrier family 22 (organic cation/carnitine transporter), member 5	0	0	16	12	20	14	62	245	18	1.00	8	7	7	7	29	237	12	1.00	4	6	8	9	27	207	11	1.00
6793	126362971	O94804	STK10	serine/threonine kinase 10	0	0	15	19	13	15	62	245	26	1.00	4	6	13	8	31	235	16	1.00	14	14	11	11	50	184	21	1.00
1605	294997282	Q14118	DAG1	dystroglycan 1	0	0	14	13	18	17	62	245	15	1.00	7	6	8	9	30	236	17	1.00	10	10	6	10	36	198	13	1.00
57609	55749758	Q9P265	DIP2B	disco interacting protein 2 homolog B	4	3	18	17	15	12	62	245	33	0.99	13	7	12	8	40	-	29		6	11	14	10	41	-	29
2617	116805340	P41250	GARS	glycyl-tRNA synthetase	5	4	15	15	20	12	62	245	23	0.90		3			3	-	3		6	12	11	9	38	-	18
1837	312147255	Q9Y4J8	DTNA	dystrobrevin alpha	3	3	21	13	11	16	61	246	26	0.99			13	14	27	-	15		6	15	13	20	54	180	28	0.77
8476	30089960	Q5VT25	CDC42BPA	CDC42 binding protein kinase alpha	2	0	14	17	18	12	61	246	26	1.00	18	22	32	25	97	174	51	1.00	17	23	21	24	85	151	50	1.00
83737	27477109	Q96J02	ITCH	itchy E3 ubiquitin protein ligase	0	0	13	13	17	18	61	246	25	1.00	14	10	9	10	43	223	27	1.00	22	24	18	25	89	147	35	1.00
10939	300192933	Q9Y4W6	AFG3L2	AFG3-like AAA ATPase 2	4	4	19	12	13	17	61	246	25	0.96	11	11	12	11	45	-	21		14	8	12	14	48	-	27
7334	4507793	P61088	UBE2N	ubiquitin conjugating enzyme E2N	2	2	19	11	17	14	61	246	12	1.00	6	6	6	6	24	-	9		3	2	6	4	15	-	10
5870	19923231	P20340	RAB6A	RAB6A, member RAS oncogene family	5	5	15	14	15	17	61	246	18	0.91	18	21	20	5	64	-	20		12	8	15	14	49	-	24
402	148612885	P36404	ARL2	ADP ribosylation factor like GTPase 2	5	5	13	14	19	15	61	246	20	0.81	10	10	8	7	35	-	17		13	12	10	11	46	-	22
6809	295842492	Q13277	STX3	syntaxin 3	0	0	13	13	17	18	61	246	19	1.00	1	1	2	1	5	-	5			2	6	6	14	-	7
57685	110578649	Q5VU97	CACHD1	cache domain containing 1	0	0	17	15	16	12	60	247	28	1.00	29	32	22	24	107	165	46	1.00	22	19	28	25	94	143	49	1.00
23176	149363689	Q92599	SEPT8	septin 8	6	4	16	17	14	13	60	247	25	0.82	20	21	18	18	77	191	25	1.00	3	9	14	14	40	-	21
8895	4503015	O75131	CPNE3	copine III	4	4	21	11	14	14	60	247	22	0.91	6	2	3	8	19	-	15		7	7	11	8	33	-	19
2584	4503895	P51570	GALK1	galactokinase 1	3	3	21	14	15	10	60	247	21	0.98	1		3		4	-	4		1	3	3	4	11	-	9
5911	10518344	P10114	RAP2A	RAP2A, member of RAS oncogene family	0	0	18	16	13	12	59	248	10	1.00	1				1	-	1		2	3		4	9	-	5
8813	4503363	O60762	DPM1	dolichyl-phosphate mannosyltransferase polypeptide 1, catalytic subunit	5	5	19	17	10	13	59	-	18		18	22	37	26	103	169	32	1.00	16	14	13	15	58	176	22	0.80
2050	32528301	P54760	EPHB4	EPH receptor B4	0	0	19	14	16	10	59	248	18	1.00	8	7	14	8	37	229	23	1.00	12	13	11	6	42	192	22	1.00
81563	13540596	Q9H246	C1orf21	chromosome 1 open reading frame 21	0	0	17	14	17	11	59	248	12	1.00	6	7	15	15	43	223	10	1.00	7	6	7	7	27	207	8	1.00
5101	45243534	Q9HC56	PCDH9	protocadherin 9	0	0	14	15	16	14	59	248	22	1.00	2	3	2	1	8	-	8		11	6	8	5	30	204	17	1.00
4218	16933567	P61006	RAB8A	RAB8A, member RAS oncogene family	4	3	10	19	16	14	59	248	13	0.94	15	13	12	10	50	216	16	0.93	8	9	9	9	35	-	14
8402	21361114	Q02978	SLC25A11	solute carrier family 25 (mitochondrial carrier; oxoglutarate carrier), member 11	11	10	19	9	12	19	59	-	20		42	49	35	30	156	128	36	0.99	24	30	30	26	110	-	33
673	33188459	P15056	BRAF	B-Raf proto-oncogene, serine/threonine kinase	1	1	9	21	16	12	58	249	24	1.00	24	30	22	32	108	164	32	1.00	14	21	17	21	73	162	23	1.00
203111	282847455	Q6P6B1	C8orf47	glutamate rich 5	3	1	15	15	18	10	58	249	26	0.99	7	5	8	9	29	237	14	0.86	12	12	13	13	50	184	27	0.98
3676	67191027	P13612	ITGA4	integrin subunit alpha 4	1	0	17	18	11	12	58	249	27	1.00	14	15	17	13	59	207	27	1.00	10	9	16	14	49	185	27	1.00
57670	257467654	Q9HCM3	KIAA1549	KIAA1549	0	0	16	13	14	15	58	249	19	1.00	9	9	13	13	44	222	22	1.00	10	11	9	12	42	192	19	1.00
4267	4505183	P14209	CD99	CD99 molecule	0	0	13	16	16	13	58	249	13	1.00	5	4	10	7	26	240	9	1.00	5	14	12	9	40	194	14	1.00
101060252	410173185	Q9H3K6	LOC101060252	bolA-like protein 2-like	3	2	14	13	15	16	58	249	8	1.00	5	4	5	4	18	-	8		2	7	7	7	23	-	7
9784	388596705	Q15036	SNX17	sorting nexin 17	2	2	13	10	14	21	58	249	20	1.00			2	1	3	-	3		2	2	4	1	9	-	8
960	321400138	P16070	CD44	CD44 molecule (Indian blood group)	0	0	15	13	13	16	57	250	12	1.00	11	10	12	12	45	221	13	1.00	3	5	9	9	26	208	10	1.00
22852	154354990	Q9UPS8	ANKRD26	ankyrin repeat domain 26	1	0	11	17	17	12	57	250	17	1.00	16	15	18	17	66	201	49	1.00	6	6	8	7	27	207	21	1.00
284069	222831660	A8MVW0	FAM171A2	family with sequence similarity 171 member A2	0	0	11	22	14	10	57	250	21	1.00	25	21	23	21	90	179	37	1.00	18	18	24	22	82	154	39	1.00
8500	29171753	Q13136	PPFIA1	protein tyrosine phosphatase, receptor type, f polypeptide (PTPRF), interacting protein (liprin), alpha 1	1	0	8	16	12	21	57	250	26	1.00	27	23	32	21	103	169	42	1.00	14	14	19	19	66	168	38	1.00
9368	4759140	O14745	SLC9A3R1	solute carrier family 9, subfamily A (NHE3, cation proton antiporter 3), member 3 regulator 1	5	2	12	14	21	10	57	250	22	0.93	1	2	2	1	6	-	4		4	6	6	7	23	-	9
394	71834861	Q13017	ARHGAP5	Rho GTPase activating protein 5	4	4	11	16	13	17	57	250	26	0.91	6	8	15	11	40	-	25		7	15	15	13	50	-	33
57498	55741641	Q9ULH0	KIDINS220	kinase D-interacting substrate 220kDa	4	0	13	17	8	18	56	251	30	0.94	33	29	44	46	152	131	72	1.00	18	19	24	20	81	155	46	0.99
64746	15826852	Q9H3P7	ACBD3	acyl-CoA binding domain containing 3	10	9	17	14	13	12	56	-	17		38	40	39	35	152	131	45	1.00	7	13	14	18	52	-	27
5515	4506017	P67775	PPP2CA	protein phosphatase 2, catalytic subunit, alpha isozyme	5	4	12	15	16	13	56	251	17	0.86	4	4	8	6	22	-	9		7	6	8	10	31	-	14
23413	17738308	P62166	NCS1	neuronal calcium sensor 1	0	0	14	16	12	13	55	252	15	1.00	5	4	8	4	21	245	9	1.00	5	5	6	5	21	213	11	1.00
57599	18874090	Q8TAF3	WDR48	WD repeat domain 48	2	2	11	12	16	16	55	252	24	1.00	48	42	25	19	134	146	46	1.00	3	4	11	8	26	-	15
9962	40316845	Q9UGH3	SLC23A2	solute carrier family 23 (ascorbic acid transporter), member 2	3	0	13	15	16	11	55	252	9	0.99	3		3	2	8	-	5		2		4	3	9	-	5
56926	51873031	Q969V3	NCLN	nicalin	4	4	11	14	14	16	55	252	25	0.91	12	16	7	10	45	-	24		9	10	11	13	43	-	26
157695	116812638	Q86YL5	C8orf42	testis development related protein	2	2	11	14	17	12	54	253	13	1.00	3	4	6		13	-	5		6	6	7	7	26	208	10	0.79
115	50959205	O60503	ADCY9	adenylate cyclase 9	0	0	19	12	10	13	54	253	22	1.00	32	41	28	25	126	152	42	1.00	28	27	27	30	112	129	43	1.00
6794	4507271	Q15831	STK11	serine/threonine kinase 11	0	0	16	17	11	10	54	253	11	1.00	6	6	6	4	22	244	11	1.00	5	3	5	3	16	218	8	1.00
26985	46370095	Q9Y2T2	AP3M1	adaptor related protein complex 3 mu 1 subunit	7	6	13	15	15	11	54	-	21		31	34	22	23	110	162	34	1.00	15	19	14	13	61	-	29
4719	316983154	P28331	NDUFS1	NADH:ubiquinone oxidoreductase core subunit S1	3	2	14	11	14	14	53	254	24	1.00	12	13	12	14	51	215	34	1.00	10	14	10	9	43	191	28	0.98
22821	38201692	Q14644	RASA3	RAS p21 protein activator 3	0	0	12	19	12	10	53	254	27	1.00	2	5	8	7	22	244	12	0.99	5	4	4	6	19	215	13	1.00
9482	4759188	Q9UNK0	STX8	syntaxin 8	1	1	12	12	16	13	53	254	17	1.00	7	10	13	11	41	225	19	1.00	16	11	13	16	56	178	16	1.00
58190	32813443	Q9GZU7	CTDSP1	CTD small phosphatase 1	0	0	17	13	11	12	53	254	14	1.00		9	8	11	28	-	11		6	7	5	5	23	211	11	1.00
5878	354721184	P51148	RAB5C	RAB5C, member RAS oncogene family	4	3	12	15	13	13	53	254	17	0.99	17	15	11	8	51	215	12	0.77	8	6	11	11	36	-	14
54504	83641874	Q9H3G5	CPVL	carboxypeptidase, vitellogenic-like	9	9	16	15	13	9	53	-	25		29	24	26	26	105	167	31	0.92	23	18	27	24	92	-	29
378	4502205	P18085	ARF4	ADP ribosylation factor 4	3	3	9	15	15	13	52	255	13	0.95	16	16	15	15	62	205	16	1.00	13	14	16	17	60	174	15	1.00
54893	124028527	Q9NXD2	MTMR10	myotubularin related protein 10	0	0	9	16	17	10	52	255	18	1.00	9	10	15	16	50	216	31	1.00	14	11	16	12	53	181	27	1.00
56681	217416369	Q9NR31	SAR1A	secretion associated, Ras related GTPase 1A	4	3	13	14	13	12	52	255	10	0.99	8	7	5	6	26	-	10		6	11	12	14	43	-	10
8826	4506787	P46940	IQGAP1	IQ motif containing GTPase activating protein 1	5	5	11	10	16	14	51	-	30		18	19	23	21	81	187	50	1.00	38	41	41	37	157	101	90	1.00
11037	26787993	Q9Y6Q2	STON1	stonin 1	0	0	15	10	14	12	51	256	18	1.00		2	8	6	16	-	10		5	8	9	6	28	206	14	1.00
3295	4504505	P51659	HSD17B4	hydroxysteroid (17-beta) dehydrogenase 4	4	3	10	11	16	14	51	256	24	0.91	5	6	6	5	22	-	19		12	8	7	12	39	-	27
83871	222144311	P0DI83	RAB34	RAB34, member RAS oncogene family	2	1	11	16	13	10	50	257	17	1.00	2	6	6	8	22	244	15	0.79	10	9	11	11	41	193	18	0.99
54874	256600192	Q5T0N5	FNBP1L	formin binding protein 1-like	1	1	14	15	6	15	50	257	23	1.00		5	5	2	12	-	8		5	2	5	4	16	218	12	0.99
1785	299758394	P50570	DNM2	dynamin 2	4	4	14	12	12	12	50	257	24	0.90	27	23	18	18	86	182	42	1.00	17	23	24	25	89	147	56	1.00
1456	73532778	Q9Y6M4	CSNK1G3	casein kinase 1, gamma 3	0	0	11	14	12	13	50	257	19	1.00	9	10	13	8	40	226	15	1.00	7	5	11	7	30	204	19	1.00
93343	24308440	Q96EY5	FAM125A	multivesicular body subunit 12A	1	1	17	8	15	10	50	257	13	1.00	1	1	3	1	6	-	5		6	9	5	7	27	207	17	1.00
55327	8922944	Q9NUP9	LIN7C	lin-7 homolog C (C. elegans)	3	2	16	15	12	7	50	257	22	0.91	15	11	10	11	47	219	17	0.99	3	7	14	14	38	-	18
125988	45387955	Q5XKP0	C19orf70	chromosome 19 open reading frame 70	3	3	10	11	16	13	50	257	8	0.98					0	-	0		1	1	3	3	8	-	7
11140	5901922	Q16543	CDC37	cell division cycle 37	7	6	11	13	14	11	49	-	17		4	3	2	3	12	-	7		22	21	23	20	86	150	20	0.99
5872	4506363	P51153	RAB13	RAB13, member RAS oncogene family	2	2	16	10	13	10	49	258	14	1.00	7	7	9	10	33	233	14	0.94	8	8	11	9	36	198	16	0.98
55704	208022632	Q3V6T2	CCDC88A	coiled-coil domain containing 88A	0	0	13	13	9	14	49	258	24	1.00	3	7	12	11	33	233	27	1.00	5	8	8	17	38	196	26	1.00
55615	311078516	P85299	PRR5	proline rich 5	1	1	13	11	15	10	49	258	15	1.00	5	5	8	7	25	241	14	1.00	14	17	16	12	59	175	21	1.00
80820	71043966	Q7L9B9	EEPD1	endonuclease/exonuclease/phosphatase family domain containing 1	0	0	9	17	13	10	49	258	19	1.00	9	8	14	15	46	220	22	1.00	9	12	10	11	42	192	22	1.00
23180	41872577	Q14699	RFTN1	raftlin, lipid raft linker 1	1	0	8	8	18	15	49	258	19	1.00	19	16	23	23	81	187	29	1.00	12	15	6	9	42	192	27	1.00
29763	19224660	Q9UKS6	PACSIN3	protein kinase C and casein kinase substrate in neurons 3	0	0	10	17	15	7	49	258	14	1.00	1	2	7	5	15	-	12		5	8	6	9	28	206	15	1.00
5211	48762920	P17858	PFKL	phosphofructokinase, liver	16	11	12	10	11	16	49	-	17		40	35	40	35	150	133	54	0.81	28	27	25	32	112	-	41
84284	14150100	Q9BSD7	NTPCR	nucleoside-triphosphatase, cancer-related	4	2	6	14	14	15	49	258	12	0.77	9	8	8	4	29	-	15		10	7	3	3	23	-	11
3993	62739161	Q6P1M3	LLGL2	lethal giant larvae homolog 2 (Drosophila)	0	0	13	12	13	10	48	259	22	1.00	6	8	6	9	29	237	18	1.00	5	5	8	7	25	209	17	1.00
3679	222418611	Q13683	ITGA7	integrin subunit alpha 7	0	0	11	13	12	12	48	259	20	1.00	24	24	23	23	94	177	43	1.00	8	12	15	20	55	179	28	1.00
54545	94721263	Q9C0I1	MTMR12	myotubularin related protein 12	1	1	12	12	8	16	48	259	20	1.00	1	1	3	4	9	-	8		5	5	7	4	21	213	14	1.00
10541	5454088	Q92688	ANP32B	acidic nuclear phosphoprotein 32 family member B	6	4	13	8	14	13	48	-	11		15	22	18	15	70	197	23	0.96	13	14	12	12	51	-	18
84243	45433499	Q9NUE0	ZDHHC18	zinc finger, DHHC-type containing 18	0	0	12	6	14	16	48	259	17	1.00	7	9	9	5	30	236	15	1.00			4		4	-	2
26003	29826294	Q9H8Y8	GORASP2	golgi reassembly stacking protein 2	3	3	10	14	15	9	48	259	13	0.93	19	25	16	21	81	187	23	1.00	3	5	7	4	19	-	11
29934	23111030	Q9UMY4	SNX12	sorting nexin 12	3	0	9	9	16	14	48	259	12	0.97	1	1			2	-	2		1			1	2	-	2
2064	54792096	P04626	ERBB2	erb-b2 receptor tyrosine kinase 2	0	0	13	14	10	10	47	260	17	1.00	7	4	10	7	28	238	17	1.00	16	12	16	16	60	174	24	1.00
23677	7657562	Q9P0V3	SH3BP4	SH3-domain binding protein 4	0	0	10	15	14	8	47	260	14	1.00	17	12	12	8	49	217	23	1.00	17	16	16	14	63	171	30	1.00
2475	4826730	P42345	MTOR	mechanistic target of rapamycin (serine/threonine kinase)	0	0	7	14	13	13	47	260	26	1.00	19	21	32	28	100	172	55	1.00	33	41	40	40	154	103	82	1.00
144100	239047795	Q6IQ23	PLEKHA7	pleckstrin homology domain containing A7	1	0	6	13	16	12	47	260	22	1.00	15	15	19	21	70	197	44	1.00	13	9	13	16	51	183	32	1.00
9475	41872583	O75116	ROCK2	Rho-associated, coiled-coil containing protein kinase 2	1	0	6	6	10	25	47	260	23	1.00	3	6	23	13	45	221	30	1.00	6	22	19	22	69	165	38	1.00
5162	156564403	P11177	PDHB	pyruvate dehydrogenase (lipoamide) beta	3	2	7	12	15	13	47	260	21	0.91	15	8	6	5	34	-	12		6	6	8	6	26	-	11
9554	380837121	O75396	SEC22B	SEC22 homolog B, vesicle trafficking protein (gene/pseudogene)	3	3	12	14	10	10	46	261	12	0.96	6	8	6	6	26	-	11		12	14	11	13	50	184	13	0.99
6641	11321640	Q13884	SNTB1	syntrophin, beta 1 (dystrophin-associated protein A1, 59kDa, basic component 1)	1	1	16	8	11	11	46	261	22	1.00	16	21	16	14	67	200	31	1.00	6	5	11	11	33	201	20	1.00
54910	157388902	Q9C0C4	SEMA4C	sema domain, immunoglobulin domain (Ig), transmembrane domain (TM) and short cytoplasmic domain, (semaphorin) 4C	0	0	12	13	13	8	46	261	17	1.00	12	11	9	7	39	227	22	1.00	7	10	5	9	31	203	19	1.00
23767	38202222	Q9NZU0	FLRT3	fibronectin leucine rich transmembrane protein 3	0	0	8	18	13	7	46	261	19	1.00	16	17	19	24	76	192	32	1.00	14	18	21	16	69	165	39	1.00
10550	5453704	O75915	ARL6IP5	ADP ribosylation factor like GTPase 6 interacting protein 5	2	1	10	11	10	15	46	261	11	1.00		1	5	6	12	-	5		24	18	15	14	71	163	12	1.00
55157	40789249	Q6PI48	DARS2	aspartyl-tRNA synthetase 2, mitochondrial	4	3	13	11	10	12	46	261	17	0.90	8	14	8	11	41	-	21		9	10	10	7	36	-	17
2040	38016911	P27105	STOM	stomatin	0	0	12	10	10	13	45	262	16	1.00	10	8	12	13	43	223	18	1.00	10	11	8	12	41	193	19	1.00
4171	33356547	P49736	MCM2	minichromosome maintenance complex component 2	4	3	7	10	16	11	44	-	19		2	1		1	4	-	4		8	11	14	13	46	188	26	0.77
23327	21361472	Q96PU5	NEDD4L	neural precursor cell expressed, developmentally down-regulated 4-like, E3 ubiquitin protein ligase	2	0	14	8	16	6	44	263	21	0.98					0	-	0		9	5	2	9	25	209	16	0.80
79720	13375926	Q9H9H4	VPS37B	vacuolar protein sorting 37 homolog B (S. cerevisiae)	2	1	18	7	8	11	44	263	13	0.98		1	2		3	-	3		4	7	5	4	20	214	9	0.84
55198	24586663	Q8NEU8	APPL2	adaptor protein, phosphotyrosine interaction, PH domain and leucine zipper containing 2	3	1	5	15	13	11	44	263	25	0.91	4	4	7	5	20	-	13		8	12	5	6	31	203	16	0.85
23380	112363096	O75044	SRGAP2	SLIT-ROBO Rho GTPase activating protein 2	3	3	12	6	15	11	44	263	19	0.76	7	14	15	14	50	216	31	0.81	12	19	15	16	62	172	34	1.00
1000	14589889	P19022	CDH2	cadherin 2, type 1, N-cadherin (neuronal)	1	1	12	8	14	10	44	263	19	1.00	2	3	7	9	21	245	14	0.99	17	15	14	15	61	173	28	1.00
51272	149192862	Q9NYM9	BET1L	Bet1 golgi vesicular membrane trafficking protein like	1	1	12	9	9	14	44	263	8	1.00	7	7	5	5	24	242	9	1.00	5	5	4	3	17	217	8	1.00
79651	93352558	Q6PJF5	RHBDF2	rhomboid 5 homolog 2 (Drosophila)	0	0	12	11	12	9	44	263	16	1.00	1	6	7	6	20	-	12		7	8	10	8	33	201	17	1.00
6810	20149560	Q12846	STX4	syntaxin 4	0	0	12	11	9	12	44	263	18	1.00	1	2	1	3	7	-	5		1	2	6	2	11	-	8
25902	337756501	Q6UB35	MTHFD1L	methylenetetrahydrofolate dehydrogenase (NADP+ dependent) 1-like	4	2	8	10	11	15	44	263	21	0.86	2	3	7	2	14	-	12		7	9	11	10	37	-	23
9495	158187521	P24588	AKAP5	A-kinase anchoring protein 5	0	0	14	8	10	11	43	264	18	1.00	2	6	13	6	27	239	11	0.99	15	22	16	17	70	164	26	1.00
9218	94721250	Q9P0L0	VAPA	VAMP associated protein A	12	11	13	11	10	9	43	-	5		34	32	30	39	135	145	17	0.90	17	25	20	17	79	-	12
29914	7019551	Q9Y5Z9	UBIAD1	UbiA prenyltransferase domain containing 1	2	2	13	9	9	12	43	264	5	0.99	8	6	5	6	25	-	4			3	3	4	10	-	3
64419	117938270	Q8NCE2	MTMR14	myotubularin related protein 14	2	2	10	12	9	12	43	264	14	1.00	4	2	7	2	15	-	11		10	9	3	7	29	-	13
51067	94681057	Q9Y2Z4	YARS2	tyrosyl-tRNA synthetase 2	2	2	8	12	13	10	43	264	15	0.99	6	6	10	4	26	-	18		9	7	5	4	25	-	16
8649	11496277	Q9UHA4	LAMTOR3	late endosomal/lysosomal adaptor, MAPK and MTOR activator 3	3	2	8	10	8	16	42	265	10	0.92	2	3	11	7	23	-	11		14	19	9	11	53	181	12	0.99
10632	51479156	O75964	ATP5L	ATP synthase, H+ transporting, mitochondrial Fo complex subunit G	3	2	9	9	9	15	42	265	7	0.96	4	7	3	4	18	-	8		2	2	2	2	8	-	4
83987	199559779	Q9H0W5	CCDC8	coiled-coil domain containing 8	0	0	9	10	11	12	42	265	22	1.00	2	3	1		6	-	5			3	10	6	19	-	11
65109	18375528	Q9BZI7	UPF3B	UPF3 regulator of nonsense transcripts homolog B (yeast)	2	2	11	12	6	12	41	266	16	0.92	7	5	10	11	33	233	15	0.82	8	7	9	10	34	200	14	0.96
51347	148746218	Q9H2K8	TAOK3	TAO kinase 3	2	1	12	12	10	7	41	266	22	0.99	4	3	12	14	33	233	21	0.84	10	9	10	9	38	196	21	0.99
9372	47717106	O95405	ZFYVE9	zinc finger, FYVE domain containing 9	2	1	10	8	15	8	41	266	18	0.99			3	3	6	-	5		8	10	13	12	43	191	29	0.99
79971	300934787	Q5T9L3	WLS	wntless Wnt ligand secretion mediator	1	0	10	11	8	12	41	266	6	1.00	4	3	8	7	22	244	13	1.00	5	6	8	10	29	205	10	1.00
25978	40254866	Q9UQN3	CHMP2B	charged multivesicular body protein 2B	1	1	11	8	12	10	41	266	18	1.00	4	6	10	4	24	242	12	1.00		7	3	4	14	-	8
1153	4502847	Q14011	CIRBP	cold inducible RNA binding protein	3	3	9	10	11	11	41	266	9	0.92	3	5	3	4	15	-	9		5	8	8	5	26	-	10
6645	5803177	Q13425	SNTB2	syntrophin, beta 2 (dystrophin-associated protein A1, 59kDa, basic component 2)	3	3	18	6	9	7	40	-	18		15	15	15	9	54	212	21	0.95	13	15	18	12	58	176	26	1.00
23348	194239705	Q9BZ29	DOCK9	dedicator of cytokinesis 9	0	0	13	8	4	15	40	267	16	1.00	12	15	15	10	52	214	41	1.00	14	22	31	23	90	146	54	1.00
387914	56090523	Q6UWI4	SHISA2	shisa family member 2	0	0	13	10	8	8	39	268	7	1.00	9	10	8	7	34	-	4	1.00	6	6	6	7	25	-	4	1.00
1020	256542306	Q00535	CDK5	cyclin-dependent kinase 5	2	1	10	10	10	9	39	268	14	0.99	21	21	21	19	82	186	20	1.00	4	8	19	12	43	191	21	0.94
6726	4507217	P49458	SRP9	signal recognition particle 9kDa	1	1	11	9	10	9	39	268	12	1.00	3	5	3	3	14	252	5	1.00	2	4	4	4	14	220	5	0.99
8613	29171740	O14495	PPAP2B	phospholipid phosphatase 3	0	0	13	7	11	8	39	268	7	1.00	4	2	4	7	17	249	7	0.99	6	6	7	6	25	209	8	1.00
55845	27544939	Q8WUW1	BRK1	BRICK1, SCAR/WAVE actin-nucleating complex subunit	1	1	12	10	10	7	39	268	14	1.00	2	3	2	6	13	253	6	0.99	4	4	3	3	14	220	6	1.00
57707	205360930	Q6P9B6	KIAA1609	TBC/LysM-associated domain containing 1	0	0	10	11	9	9	39	268	11	1.00	3	5	7	2	17	249	10	0.99	6	7	5	3	21	213	13	1.00
1719	4503323	P00374	DHFR	dihydrofolate reductase	4	3	14	7	10	8	39	-	11		16	14	19	17	66	201	23	1.00	18	21	28	19	86	150	21	1.00
3643	119395736	P06213	INSR	insulin receptor	0	0	14	9	9	7	39	268	23	1.00	14	18	16	11	59	207	34	1.00	9	10	13	14	46	188	24	1.00
2894	55770852	Q9ULK0	GRID1	glutamate receptor, ionotropic, delta 1	0	0	11	11	11	6	39	268	13	1.00	5	6	14	11	36	230	21	1.00	7	8	11	11	37	197	22	1.00
165215	116875848	Q6P995	FAM171B	family with sequence similarity 171 member B	0	0	10	10	8	11	39	268	15	1.00	30	31	22	25	108	164	45	1.00	8	11	15	11	45	189	23	1.00
11078	88501738	Q9H2D6	TRIOBP	TRIO and F-actin binding protein	1	0	8	10	13	8	39	268	21	1.00	10	7	8	10	35	231	19	1.00	15	16	10	12	53	181	22	1.00
8239	145309309	Q93008	USP9X	ubiquitin specific peptidase 9, X-linked	6	5	11	13	10	5	39	-	16		16	18	16	16	66	201	26	0.92	5	18	15	16	54	-	31
9076	10863887	O95832	CLDN1	claudin 1	0	0	9	8	12	10	39	268	8	1.00	6	6	6	4	22	244	8	1.00			5	1	6	-	3
11311	18105063	Q9NRW7	VPS45	vacuolar protein sorting 45 homolog (S. cerevisiae)	5	3	9	8	10	11	38	-	17		11	16	16	20	63	204	35	0.92	18	19	13	13	63	171	28	0.98
25963	31377765	Q8NBN3	TMEM87A	transmembrane protein 87A	1	1	5	14	11	8	38	269	16	1.00	18	15	15	12	60	206	20	1.00	6	8	2	4	20	214	12	0.99
3675	4504747	P26006	ITGA3	integrin subunit alpha 3	0	0	12	10	8	8	38	269	13	1.00	7	6	5	7	25	241	11	1.00	3	5	4	3	15	219	9	1.00
55103	32441283	Q86X27	RALGPS2	Ral GEF with PH domain and SH3 binding motif 2	1	0	8	8	10	12	38	269	16	1.00	1	1	3	2	7	-	5		5	4	3	4	16	218	9	1.00
4698	4826848	Q16718	NDUFA5	NADH:ubiquinone oxidoreductase subunit A5	3	2	9	8	11	10	38	269	9	0.94					0	-	0		6	5	4	4	19	-	6
3482	119964726	P11717	IGF2R	insulin like growth factor 2 receptor	2	2	10	9	8	10	37	270	20	0.98	18	23	19	23	83	185	44	1.00	30	45	51	45	171	95	73	1.00
214	343168770	Q13740	ALCAM	activated leukocyte cell adhesion molecule	0	0	9	11	8	9	37	270	18	1.00	5	4	11	10	30	236	16	1.00	6	6	13	9	34	200	14	1.00
8655	4505813	P63167	DYNLL1	dynein, light chain, LC8-type 1	3	2	8	7	14	8	37	270	7	0.83					0	-	0			1			1	-	1
4085	4505067	Q13257	MAD2L1	MAD2 mitotic arrest deficient-like 1 (yeast)	1	1	10	7	9	10	36	271	8	1.00			3	5	8	-	2		1	2	3	3	9	-	4
84173	203098474	Q96FG2	ELMOD3	ELMO/CED-12 domain containing 3	1	0	11	10	7	8	36	271	15	1.00	2	4	8	5	19	247	8	0.99	5	7	7	5	24	210	10	1.00
284119	42734430	Q6NZI2	PTRF	polymerase I and transcript release factor	0	0	13	10	6	7	36	271	17	1.00	4	6	6	3	19	247	12	1.00	10	9	14	12	45	189	19	1.00
8036	392841224	Q9UQ13	SHOC2	SHOC2 leucine-rich repeat scaffold protein	0	0	11	6	12	7	36	271	13	1.00	6	5	4	3	18	248	9	1.00	6	4	4	5	19	215	13	1.00
55092	209977052	Q9NW97	TMEM51	transmembrane protein 51	0	0	8	8	13	7	36	271	12	1.00	5	5	7	8	25	241	7	1.00	7	8	11	11	37	197	11	1.00
347902	219521831	Q86SJ2	AMIGO2	adhesion molecule with Ig-like domain 2	0	0	5	4	16	11	36	271	10	1.00	3	3	7	9	22	244	15	1.00	6	5	3	5	19	215	8	1.00
10152	109689723	Q9NYB9	ABI2	abl-interactor 2	2	2	5	9	13	9	36	271	19	0.84	14	22	19	20	75	193	24	1.00	4	4	5	12	25	-	13
7298	4507751	P04818	TYMS	thymidylate synthetase	2	2	9	8	9	10	36	271	11	0.98		1	1		2	-	2		4	3	3	4	14	-	10
6427	306482646	Q01130	SRSF2	serine/arginine-rich splicing factor 2	3	3	8	10	9	9	36	271	8	0.78	3	2		2	7	-	3		1	3	3	2	9	-	6
208	339895853	P31751	AKT2	v-akt murine thymoma viral oncogene homolog 2	1	1	8	7	9	11	35	272	12	1.00	25	26	24	20	95	176	25	1.00	9	11	12	9	41	193	18	1.00
5770	4506289	P18031	PTPN1	protein tyrosine phosphatase, non-receptor type 1	9	8	6	9	11	9	35	-	14		17	20	22	16	75	-	28		24	25	29	26	104	134	35	0.98
2048	111118978	P29323	EPHB2	EPH receptor B2	0	0	10	10	7	8	35	272	14	1.00	11	14	12	6	43	223	20	1.00	10	13	8	11	42	192	21	1.00
6509	21314632	P43007	SLC1A4	solute carrier family 1 (glutamate/neutral amino acid transporter), member 4	1	0	10	7	11	7	35	272	11	1.00	5	6	12	7	30	236	11	1.00	11	10	11	10	42	192	22	1.00
4478	4505257	P26038	MSN	moesin	2	2	10	9	8	8	35	272	15	0.98	6	4	2	5	17	-	13		9	12	13	11	45	189	14	1.00
55742	315583337	Q9NVD7	PARVA	parvin alpha	1	1	9	7	10	9	35	272	8	1.00			4	2	6	-	5		6	9	5	5	25	209	12	1.00
3107	339882741	P04222	HLA-C	major histocompatibility complex, class I, C	3	2	10	8	7	10	35	272	10	0.86	6	6	8	8	28	-	16		4				4	-	3
285761	27735143	Q8N8Z6	DCBLD1	discoidin, CUB and LCCL domain containing 1	0	0	9	6	10	9	34	273	10	1.00	16	16	20	20	72	196	26	1.00	11	13	14	13	51	183	21	1.00
25800	153252201	Q13433	SLC39A6	solute carrier family 39 (zinc transporter), member 6	0	0	9	9	8	8	34	273	17	1.00	12	15	21	22	70	197	22	1.00	10	13	15	18	56	178	24	1.00
3704	15626999	Q9BY32	ITPA	inosine triphosphatase	1	0	9	8	8	9	34	273	8	1.00			1	1	2	-	2		6	8	5	5	24	210	6	1.00
23042	190341074	Q6P996	PDXDC1	pyridoxal-dependent decarboxylase domain containing 1	7	7	7	6	16	5	34	-	16		35	39	55	57	186	112	65	1.00	8	21	8	12	49	-	29
124583	20270339	Q8WVQ1	CANT1	calcium activated nucleotidase 1	1	1	7	9	8	10	34	273	12	1.00	9	6	14	10	39	227	23	1.00	2	3	3	1	9	-	6
5663	195947397	P49768	PSEN1	presenilin 1	1	1	10	8	9	7	34	273	6	1.00			2		2	-	1		1	3	3	1	8	-	4
6457	223468657	Q99963	SH3GL3	SH3-domain GRB2-like 3	1	0	8	9	9	8	34	273	13	1.00			1		1	-	1		3			3	6	-	4
8674	297591831	O75379	VAMP4	vesicle associated membrane protein 4	1	0	8	9	9	8	34	273	8	1.00	1	2	1	2	6	-	4			2	2	3	7	-	4
23527	187608516	Q15057	ACAP2	ArfGAP with coiled-coil, ankyrin repeat and PH domains 2	2	1	12	8	6	8	34	273	16	0.97	1	2			3	-	3		6	3	4	2	15	-	11
64398	375065852	Q8N3R9	MPP5	membrane protein, palmitoylated 5	2	2	10	9	9	6	34	273	11	0.92	1		4	1	6	-	5		4	4	5	4	17	-	8
4155	68509938	P02686	MBP	myelin basic protein	0	0	10	9	5	9	33	274	7	1.00			1		1	-	1		4	3	2	3	12	222	5	0.99
4238	205277369	P55082	MFAP3	microfibrillar associated protein 3	0	0	8	9	10	6	33	274	11	1.00		2	5	2	9	-	5		5	2	2	4	13	221	8	0.99
57553	209862789	Q7RTP6	MICAL3	microtubule associated monooxygenase, calponin and LIM domain containing 3	3	3	9	7	9	8	33	-	18		14	14	13	15	56	210	36	1.00	12	17	17	16	62	172	37	1.00
80381	67188443	Q5ZPR3	CD276	CD276 molecule	0	0	10	9	6	8	33	274	8	1.00	3	4	5	4	16	250	6	1.00	6	6	5	4	21	213	11	1.00
57182	268607595	Q9ULJ7	ANKRD50	ankyrin repeat domain 50	0	0	9	7	12	5	33	274	16	1.00	13	17	18	18	66	201	39	1.00	8	12	13	10	43	191	31	1.00
24140	7110661	Q9UET6	FTSJ1	FtsJ RNA methyltransferase homolog 1 (E. coli)	1	0	5	11	9	8	33	274	12	1.00	6	9	12	11	38	228	12	1.00	10	8	9	13	40	194	13	1.00
5151	27734721	O60658	PDE8A	phosphodiesterase 8A	0	0	9	7	11	6	33	274	12	1.00	1	6	7	5	19	-	11		4	5	3	4	16	218	9	1.00
10890	256222019	P61026	RAB10	RAB10, member RAS oncogene family	2	1	10	8	7	8	33	274	5	0.98	6	6	4	8	24	242	5	0.90	4	7	1	2	14	-	4
115290	18643385	Q96EF6	FBXO17	F-box protein 17	1	0	7	12	8	6	33	274	9	1.00			4	2	6	-	5		1		1	1	3	-	3
10128	31621305	P42704	LRPPRC	leucine rich pentatricopeptide repeat containing	7	6	3		11	18	32	-	13		6	6	10	5	27	-	16		25	26	26	26	103	135	55	1.00
22931	10880989	Q9NP72	RAB18	RAB18, member RAS oncogene family	3	2	8	14		10	32	-	12		11	9	11	6	37	229	19	0.81	9	16	13	12	50	184	23	0.99
116987	80978930	Q9UPQ3	AGAP1	ArfGAP with GTPase domain, ankyrin repeat and PH domain 1	0	0	9	6	11	6	32	275	16	1.00	2	5	6	2	15	251	9	0.99	10	9	3	9	31	203	20	1.00
2043	4758280	P54764	EPHA4	EPH receptor A4	1	1	10	9	9	4	32	275	12	1.00	4	7	11	11	33	233	15	1.00	12	12	12	9	45	189	22	1.00
79109	13129138	Q9BPZ7	MAPKAP1	mitogen-activated protein kinase associated protein 1	1	1	7	7	8	10	32	275	13	1.00	14	10	15	20	59	207	22	1.00	14	18	14	14	60	174	21	1.00
8795	224494019	O14763	TNFRSF10B	tumor necrosis factor receptor superfamily member 10b	0	0	9	8	4	11	32	275	12	1.00		3	3	4	10	-	5		9	12	8	11	40	194	14	1.00
567	4757826	P61769	B2M	beta-2-microglobulin	0	0	11	5	8	8	32	275	8	1.00			1	1	2	-	2						0	-	0
10469	33636719	O43615	TIMM44	translocase of inner mitochondrial membrane 44 homolog (yeast)	2	2	7	8	11	6	32	275	9	0.89			1	2	3	-	3		5	3	4	4	16	-	11
55161	224589127	P57088	TMEM33	transmembrane protein 33	3	3	12	4	8	7	31	-	12		11	14	11	15	51	215	17	0.99	9	14	10	11	44	190	15	0.93
84902	50083293	Q96ST8	CEP89	centrosomal protein 89kDa	0	0	9	6	12	4	31	276	15	1.00	23	16	20	19	78	190	34	1.00	13	15	18	15	61	173	32	1.00
6102	170016081	O75695	RP2	retinitis pigmentosa 2 (X-linked recessive)	0	0	7	13	6	5	31	276	13	1.00	12	13	6	6	37	229	16	1.00	8	8	12	10	38	196	14	1.00
5898	33946329	P11233	RALA	v-ral simian leukemia viral oncogene homolog A (ras related)	0	0	5	6	8	12	31	276	11	1.00	3	4	6	4	17	249	12	1.00	1	1	3	2	7	-	5
10602	19923356	Q9UKI2	CDC42EP3	CDC42 effector protein 3	0	0	12	8	7	4	31	276	11	1.00					0	-	0			2			2	-	2
26517	11024700	Q9Y5L4	TIMM13	translocase of inner mitochondrial membrane 13 homolog (yeast)	0	0	6	6	13	6	31	276	12	1.00	3	4	1	1	9	-	6		1	3			4	-	2
26168	21361499	Q9H4L4	SENP3	SUMO1/sentrin/SMT3 specific peptidase 3	2	2	8	8	10	5	31	276	6	0.83	4	3	7	6	20	-	9		7	4	6	5	22	-	9
53918	31880783	Q9BRX2	PELO	pelota homolog (Drosophila)	2	1	7	7	5	11	30	277	11	0.95	2	1	4	2	9	-	8		4	3	5	5	17	217	8	0.77
4534	4557896	Q13496	MTM1	myotubularin 1	0	0	12	4	8	6	30	277	16	1.00	10	8	4	3	25	241	14	1.00	2	4	5	3	14	220	11	0.99
3480	4557665	P08069	IGF1R	insulin like growth factor 1 receptor	0	0	12	6	5	7	30	277	15	1.00	6	7	8	8	29	237	22	1.00	9	7	11	13	40	194	23	1.00
84451	155723000	Q5TCX8	KIAA1804	mixed lineage kinase 4	1	1	7	4	6	13	30	277	14	1.00	11	6	13	10	40	226	27	1.00	4	6	6	9	25	209	13	1.00
6560	225579061	Q9UP95	SLC12A4	solute carrier family 12 (potassium/chloride transporter), member 4	0	0	7	8	7	8	30	277	15	1.00	12	5	9	8	34	232	24	1.00	6	5	8	10	29	205	22	1.00
201475	106507164	Q6IQ22	RAB12	RAB12, member RAS oncogene family	0	0	7	8	10	5	30	277	14	1.00	5	3	2	2	12	254	9	0.99		2	5	3	10	-	6
57171	30794376	Q86YN1	DOLPP1	dolichyldiphosphatase 1	2	1	9	7	6	8	30	277	5	0.96	1	1	1	1	4	-	4		6	5	1		12	-	4
27	209862778	P42684	ABL2	ABL proto-oncogene 2, non-receptor tyrosine kinase	2	1	10	7	5	8	30	277	15	0.95	1	6	8	5	20	-	14		2	5	3	2	12	-	9
3422	40018633	Q13907	IDI1	isopentenyl-diphosphate delta isomerase 1	3	0	9	5	5	10	29	278	13	0.82	4	4	4	6	18	-	9		10	6	7	8	31	203	12	0.89
8503	166795245	Q92569	PIK3R3	phosphoinositide-3-kinase regulatory subunit 3	0	0	9	8	7	5	29	278	16	1.00	11	11	13	13	48	218	25	1.00	16	13	25	24	78	158	26	1.00
114793	52485606	Q96PY5	FMNL2	formin like 2	0	0	8	7	5	9	29	278	10	1.00				6	6	-	4		6	8	11	11	36	198	20	1.00
10282	5031611	O15155	BET1	Bet1 golgi vesicular membrane trafficking protein	2	1	5	9	7	8	29	278	5	0.95	6	9	9	8	32	234	8	0.97	4	4	3		11	-	3
3714	21704277	Q9Y219	JAG2	jagged 2	0	0	6	5	7	11	29	278	10	1.00	2	2	4	2	10	256	5	0.98	1	2	2	4	9	-	6
5784	34328899	Q15678	PTPN14	protein tyrosine phosphatase, non-receptor type 14	3	2	11	6	3	9	29	-	16		13	9	18	14	54	212	32	0.99	4	9	9	9	31	-	23
538	115529486	Q04656	ATP7A	ATPase, Cu++ transporting, alpha polypeptide	0	0	7	9	6	6	28	279	11	1.00	9	8	7	6	30	236	23	1.00	13	9	14	7	43	191	28	1.00
6533	197276623	P31641	SLC6A6	solute carrier family 6 (neurotransmitter transporter), member 6	0	0	7	7	6	8	28	279	8	1.00	8	7	10	11	36	230	12	1.00	5	5	4	5	19	215	8	1.00
84188	24308324	Q8WVX9	FAR1	fatty acyl-CoA reductase 1	2	2	10	6	5	7	28	-	10		9	9	8	7	33	233	18	0.95	3	4	4	2	13	-	11
1327	4502981	P13073	COX4I1	cytochrome c oxidase subunit IV isoform 1	2	1	6	8	5	9	28	279	7	0.94					0	-	0		1		1	2	4	-	3
7386	163644321	P47985	UQCRFS1	ubiquinol-cytochrome c reductase, Rieske iron-sulfur polypeptide 1	2	1	8	3	8	9	28	279	11	0.89					0	-	0		3	2	2	3	10	-	6
10542	38788353	O43504	HBXIP	late endosomal/lysosomal adaptor, MAPK and MTOR activator 5	2	2	7	6	9	6	28	279	8	0.82	3	3	2	5	13	-	5		4	6	4	3	17	-	5
64924	20070323	Q8TAD4	SLC30A5	solute carrier family 30 (zinc transporter), member 5	2	1	3	8	9	7	27	280	12	0.88	40	34	38	32	144	139	26	1.00	5	9	6	6	26	208	14	0.93
1836	100913030	P50443	SLC26A2	solute carrier family 26 (anion exchanger), member 2	0	0	12	6	6	3	27	280	7	1.00	3	2	2	2	9	257	7	0.98	4	5	4	2	15	219	8	0.99
139818	145699123	Q5JSL3	DOCK11	dedicator of cytokinesis 11	1	0	10		9	8	27	-	14		9	17	23	20	69	198	45	1.00	13	23	16	18	70	164	49	1.00
29801	32698692	Q9ULC8	ZDHHC8	zinc finger, DHHC-type containing 8	0	0	10	6	7	4	27	280	13	1.00	9	11	13	13	46	220	20	1.00	9	13	9	13	44	190	20	1.00
55699	46852147	Q9NSE4	IARS2	isoleucyl-tRNA synthetase 2, mitochondrial	1	1	8	9	5	5	27	280	15	1.00	6	6	5	7	24	242	21	1.00	4	5	5	5	19	215	15	1.00
23228	163644311	Q9UPR0	PLCL2	phospholipase C like 2	0	0	7	10	6	4	27	280	15	1.00	7	8	5	6	26	240	20	1.00	5	9	8	7	29	205	20	1.00
10490	5454166	Q9UEU0	VTI1B	vesicle transport through interaction with t-SNAREs 1B	0	0	7	7	7	6	27	280	12	1.00	3	3	3	3	12	254	7	1.00	6	7	5	7	25	209	11	1.00
5128	281427168	Q00537	CDK17	cyclin-dependent kinase 17	1	0	7	8	5	7	27	280	14	1.00		10	9	8	27	-	14		6	5	7	9	27	207	15	1.00
10788	116089337	Q13576	IQGAP2	IQ motif containing GTPase activating protein 2	2	1	6	9	5	7	27	280	15	0.94	4	2	8	4	18	-	15		17	18	10	12	57	177	40	1.00
200734	189571671	Q7Z698	SPRED2	sprouty-related, EVH1 domain containing 2	0	0	6	7	8	6	27	280	9	1.00	4		2	2	8	-	5		6	4	7	6	23	211	14	1.00
57120	62868213	Q9HD26	GOPC	golgi-associated PDZ and coiled-coil motif containing	2	1	7	7	6	7	27	280	15	0.95	9	8	16	16	49	217	31	0.99		4	3		7	-	6
219	25777730	P30837	ALDH1B1	aldehyde dehydrogenase 1 family member B1	1	1	7	8	7	5	27	280	12	1.00	3	8	4	3	18	248	9	1.00	3	3		3	9	-	7
2222	67089147	P37268	FDFT1	farnesyl-diphosphate farnesyltransferase 1	0	0	9	6	4	8	27	280	14	1.00	1	5	4	4	14	-	8		1	3	4	3	11	-	7
55612	116686114	Q9BQL6	FERMT1	fermitin family member 1	0	0	8	2	8	9	27	280	8	0.99	1	3	3	2	9	-	6		4	1	2	1	8	-	6
23007	195972871	Q4KWH8	PLCH1	phospholipase C eta 1	0	0	9	7	6	4	26	281	14	1.00	20	20	31	31	102	170	56	1.00	16	22	29	22	89	147	43	1.00
57620	281182822	Q9P246	STIM2	stromal interaction molecule 2	0	0	9	10	3	4	26	281	10	1.00	6	6	11	8	31	235	19	1.00	10	7	11	9	37	197	19	1.00
738	8393009	Q9UID3	C11orf2	VPS51 GARP complex subunit	4	3	8	7	7	4	26	-	11		6	6	7	8	27	-	21		16	24	13	18	71	163	36	1.00
81609	31742501	Q96L92	SNX27	sorting nexin family member 27	2	1	5	8	7	6	26	281	14	0.93	1	3	2		6	-	5		9	14	17	22	62	172	29	1.00
55890	40217831	Q9NQ84	GPRC5C	G protein-coupled receptor, class C, group 5, member C	0	0	6	8	6	6	26	281	10	1.00	3	5	6	5	19	247	11	1.00	1	3	6	4	14	-	7
79683	24371241	Q8IZN3	ZDHHC14	zinc finger, DHHC-type containing 14	0	0	6	4	9	7	26	281	11	1.00	5	4	6	5	20	246	11	1.00		2	6	4	12	-	8
5874	5729997	O00194	RAB27B	RAB27B, member RAS oncogene family	0	0	2	7	9	8	26	281	8	0.99	3	3	6	3	15	251	8	1.00		2	4	3	9	-	5
5226	40068518	P52209	PGD	phosphogluconate dehydrogenase	5	4	3	6	8	8	25	-	10						0	-	0		15	12	16	17	60	174	23	0.89
11119	222418658	O00481	BTN3A1	butyrophilin subfamily 3 member A1	0	0	7	6	8	4	25	282	8	1.00					0	-	0						0	-	0
94030	122937309	Q9NT99	LRRC4B	leucine rich repeat containing 4B	0	0	7	9	4	5	25	282	13	1.00	6	5	5	4	20	246	11	1.00	3	7	2	4	16	218	13	0.99
8751	387849014	Q13444	ADAM15	ADAM metallopeptidase domain 15	0	0	9	5	3	8	25	282	9	1.00			1		1	-	1						0	-	0
5147	4505671	O43924	PDE6D	phosphodiesterase 6D	1	1	5	9	4	7	25	282	7	1.00		1	5	3	9	-	7		1	2	3	2	8	-	7
63894	20127607	Q9H9C1	C14orf133	VPS33B interacting protein, apical-basolateral polarity regulator, spe-39 homolog	1	1	4	9	7	7	27	282	14	1.00			3	1	4	-	3		2		3	6	11	-	7
6000	156627563	P49802	RGS7	regulator of G-protein signaling 7	0	0	3	10	4	8	25	282	9	1.00		1	1	2	4	-	4		1	4	3	1	9	-	7
11079	116812591	O15258	RER1	retention in endoplasmic reticulum sorting receptor 1	3	2	5	4	8	7	24	-	12		10	2	9	9	30	-	13		7	12	9	11	39	195	12	0.89
57003	171906582	Q96A33	CCDC47	coiled-coil domain containing 47	7	4	6	9	7	2	24	-	7		17	22	21	21	81	187	27	0.99	17	26	23	22	88	148	29	0.99
10455	260274832	O75521	ECI2	enoyl-CoA delta isomerase 2	1	0	5	9	5	5	24	283	11	1.00	3	3	3	4	13	253	6	1.00	1	2	4	3	10	-	7
10972	98986464	P49755	TMED10	transmembrane p24 trafficking protein 10	2	1	5	8	5	6	24	283	5	0.91	1	2	4	3	10	-	4		3	4	3	1	11	-	8
64423	149999378	Q27J81	INF2	inverted formin, FH2 and WH2 domain containing	4	4	8	7	4	4	23	-	9		2	2	3	2	9	-	8		14	10	14	15	53	181	29	0.84
55690	30089916	Q6VY07	PACS1	phosphofurin acidic cluster sorting protein 1	2	2	3	11	4	5	23	-	13		10	11	25	21	67	200	37	1.00	7	7	6	9	29	205	19	0.86
6723	63253298	P19623	SRM	spermidine synthase	4	2	2	7	9	5	23	-	13		11	9	9	5	34	-	16		10	12	14	15	51	183	15	0.98
22905	156671215	O95208	EPN2	epsin 2	1	1	9	3	7	4	23	284	15	1.00	6	9	2	5	22	244	12	0.99	2	3	5	4	14	220	11	0.99
9772	157502197	Q12767	KIAA0195	transmembrane protein 94	0	0	9	4	3	7	23	284	13	1.00	5	8	5	6	24	242	13	1.00	14	15	17	12	58	176	28	1.00
57648	112734870	Q9P206	KIAA1522	KIAA1522	0	0	9	6	3	5	23	284	12	1.00	13	14	10	6	43	223	28	1.00	13	7	11	11	42	192	24	1.00
1464	47419930	Q6UVK1	CSPG4	chondroitin sulfate proteoglycan 4	0	0	7	5	6	5	23	284	11	1.00	10	6	9	11	36	230	29	1.00	6	6	6	6	24	210	18	1.00
9131	22202629	O95831	AIFM1	apoptosis inducing factor, mitochondria associated 1	2	0	5	7	8	3	23	284	14	0.85	6	9	6	3	24	242	14	0.86	3	3	3	2	11	-	9
1717	119943112	Q9UBM7	DHCR7	7-dehydrocholesterol reductase	2	1	8	5	6	4	23	284	7	0.88	7	6	4	7	24	242	7	0.90	3	4	5	2	14	-	7
6576	21389315	P53007	SLC25A1	solute carrier family 25 (mitochondrial carrier; citrate transporter), member 1	5	5	5	6	7	5	23	-	10		16	21	22	22	81	187	15	0.99	10	10	9	10	39	-	11
5605	13489054	P36507	MAP2K2	mitogen-activated protein kinase kinase 2	1	0	3	7	7	6	23	284	7	1.00	4	3	4	4	15	251	10	1.00	1	4	5	4	14	-	8
6868	73747889	P78536	ADAM17	ADAM metallopeptidase domain 17	0	0	5	5	8	5	23	284	8	1.00	4	2	1	1	8	-	4				1		1	-	1
84669	22550104	Q8NFA0	USP32	ubiquitin specific peptidase 32	0	0	2	10	2	8	22	285	12	0.99	2	3	12	12	29	237	20	0.99	4	7	8	5	24	210	19	1.00
81671	20070349	Q96GC9	VMP1	vacuole membrane protein 1	1	1	7	6	6	3	22	-	4	1.00			2	2	4	-	4		9	7	7	6	29	205	7	1.00
7782	21359890	O14863	SLC30A4	solute carrier family 30 (zinc transporter), member 4	0	0	7	6	8	1	22	-	4		1		2	2	5	-	3		10	9	8	7	34	200	9	1.00
80728	58331179	Q9C0H5	ARHGAP39	Rho GTPase activating protein 39	0	0	8	4	6	4	22	285	14	1.00	1	3	3	2	9	-	5		4	6	7	4	21	213	13	1.00
9213	19923272	Q9UBH6	XPR1	xenotropic and polytropic retrovirus receptor 1	0	0	5	4	7	6	22	285	9	1.00	5	1	6	8	20	-	12		3	7	10	8	28	206	14	1.00
25776	389886564	Q9Y3M2	CBY1	chibby homolog 1 (Drosophila)	0	0	5	4	8	5	22	285	11	1.00	2	4	4	3	13	253	6	0.99	2	2	1	3	8	-	7
6513	166795299	P11166	SLC2A1	solute carrier family 2 (facilitated glucose transporter), member 1	2	2	5	6	5	6	22	-	9		15	12	12	11	50	216	14	1.00	4	6	6	5	21	-	9
10049	17388799	O75190	DNAJB6	DnaJ heat shock protein family (Hsp40) member B6	1	0	3	7	4	8	22	285	12	1.00	1	3	3	2	9	-	8			1	3	2	6	-	4
27346	109948302	Q5BJF2	TMEM97	transmembrane protein 97	2	1	6	6	6	3	21	286	6	0.84	6	6	5	6	23	-	4	0.91	4	3	4	6	17	217	5	0.76
85456	110556636	Q9C0C2	TNKS1BP1	tankyrase 1 binding protein 1	4	4	5	2	6	8	21	-	11		10	7	8	8	33	-	23		11	13	20	25	69	165	46	0.91
55964	156602653	Q9UH03	SEPT3	septin 3	1	1	6	5	1	9	21	-	10		5	10	9	8	32	234	15	1.00	2	2	5	3	12	222	8	0.99
6674	27262636	Q07617	SPAG1	sperm associated antigen 1	1	1	9	4	6	2	21	286	7	0.99	2	3	3	1	9	-	9		3	2	2	4	11	223	8	0.99
9578	115527097	Q9Y5S2	CDC42BPB	CDC42 binding protein kinase beta	1	0	5		6	10	21	-	8		7	12	11	14	44	222	28	1.00	12	11	11	15	49	185	32	1.00
84668	19923646	Q9BYI3	FAM126A	family with sequence similarity 126 member A	1	0	5	7	2	7	21	286	7	0.99	3	7	7	5	22	244	8	1.00	10	11	7	7	35	199	11	1.00
6548	27777632	P19634	SLC9A1	solute carrier family 9, subfamily A (NHE1, cation proton antiporter 1), member 1	0	0	4	5	5	7	21	286	8	1.00	5	11	11	14	41	225	21	1.00	6	9	9	8	32	202	14	1.00
84295	28557677	Q8IWS0	PHF6	PHD finger protein 6	1	1	7	4	6	4	21	286	8	1.00	2	2	3		7	-	3		5	4	5	4	18	216	8	1.00
56957	118026942	Q6GQQ9	OTUD7B	OTU deubiquitinase 7B	0	0	5	5	7	4	21	286	10	1.00			3	2	5	-	4		5	7	5	4	21	213	7	1.00
5795	148728162	Q12913	PTPRJ	protein tyrosine phosphatase, receptor type J	0	0	7	7	3	4	21	286	14	1.00	6	8	9	7	30	236	20	1.00	1	3	7	6	17	-	13
353189	38679890	Q6ZQN7	SLCO4C1	solute carrier organic anion transporter family member 4C1	0	0	6	6	2	7	21	286	8	0.99					0	-	0						0	-	0
59339	154146216	Q9HB19	PLEKHA2	pleckstrin homology domain containing A2	1	0	6	6	4	5	21	286	6	1.00	1		3	4	8	-	5		1	1	1	3	6	-	4
89941	20270303	Q8IXI1	RHOT2	ras homolog family member T2	2	1	3	6	4	7	20	287	10	0.81	5	6	5	7	23	243	14	0.90	4	4	8	5	21	213	15	0.85
114885	19923592	Q9BXB4	OSBPL11	oxysterol binding protein like 11	3	3	4	6	7	3	20	-	11		8	9	10	11	38	228	17	0.81	13	8	14	11	46	188	26	0.88
57478	120587027	Q70CQ4	USP31	ubiquitin specific peptidase 31	0	0	4	6	8	2	20	287	10	0.99	11	12	8	9	40	226	23	1.00	7	5	7	8	27	207	18	1.00
89970	45387949	Q96DX4	RSPRY1	ring finger and SPRY domain containing 1	0	0	8	2	4	6	20	287	8	0.99	2		1		3	-	3		5	3	4	4	16	218	10	1.00
9789	162417971	Q15005	SPCS2	signal peptidase complex subunit 2	1	0	8	4	3	5	20	287	6	1.00			2		2	-	2		8	7	6	5	26	208	9	1.00
8936	4507913	Q92558	WASF1	WAS protein family member 1	1	0	7	7	3	3	20	287	12	1.00			3	3	6	-	6		3	5	6	5	19	215	8	1.00
55633	40068063	Q9NU19	TBC1D22B	TBC1 domain family member 22B	4	1	4	6	6	4	20	-	11		14	6	7	10	37	229	24	0.81	4	7	5	5	21	-	14
23657	7657683	Q9UPY5	SLC7A11	solute carrier family 7 (anionic amino acid transporter light chain, xc- system), member 11	1	0	5	4	5	6	20	287	9	1.00	5	6	16	9	36	230	8	1.00	8	6	2		16	-	6
4139	153791472	Q9P0L2	MARK1	MAP/microtubule affinity-regulating kinase 1	1	1	2	7	5	6	20	287	8	0.99	8	8	15	9	40	226	27	1.00		9	5	8	22	-	18
6505	66773030	P43005	SLC1A1	solute carrier family 1 (neuronal/epithelial high affinity glutamate transporter, system Xag), member 1	0	0	6	2	8	4	20	287	7	0.99			1		1	-	1				1	1	2	-	2
387882	223633952	Q8TAD7	C12orf75	chromosome 12 open reading frame 75	0	0	3	4	6	7	20	287	8	1.00					0	-	0						0	-	0
813	314122177	O43852	CALU	calumenin	1	0	2	4	9	5	20	287	9	0.99					0	-	0		1		2		3	-	2
391	46249393	P84095	RHOG	ras homolog family member G	1	1	4	6	4	6	20	287	6	1.00	2		4	2	8	-	6		1	4	4	5	14	-	8
26528	25470886	Q96EP5	DAZAP1	DAZ associated protein 1	6	3	4	5	7	3	19	-	6				1		1	-	1		13	15	14	12	54	180	13	0.84
128869	17998700	Q9H490	PIGU	phosphatidylinositol glycan anchor biosynthesis class U	2	1	3	6	7	3	19	288	6	0.76	1	1	2	4	8	-	7		10	6	4	8	28	206	11	0.92
285513	112821690	Q6ZVF9	GPRIN3	GPRIN family member 3	0	0	6	9		4	19	-	9		11	7	8	8	34	232	26	1.00	6	9	8	8	31	203	23	1.00
323	260593729	Q92870	APBB2	amyloid beta (A4) precursor protein-binding, family B, member 2	0	0	6	5	2	6	19	288	8	0.99	4	7	8	6	25	241	15	1.00	6	3	4	3	16	218	11	1.00
5786	18450369	P18433	PTPRA	protein tyrosine phosphatase, receptor type A	0	0	5	3	5	6	19	288	11	1.00	3		2		5	-	5		7	5	4	8	24	210	14	1.00
10423	5453906	O14735	CDIPT	CDP-diacylglycerol--inositol 3-phosphatidyltransferase	3	3	4	4	6	5	19	-	12		8	10	12	10	40	226	12	0.85	7	6	3	4	20	-	10
4919	134152725	Q01973	ROR1	receptor tyrosine kinase-like orphan receptor 1	1	0	5	4	6	4	19	288	11	1.00	7	3	3	3	16	250	10	1.00	2	1		2	5	-	4
10560	27734719	O60779	SLC19A2	solute carrier family 19 (thiamine transporter), member 2	0	0	6	3	5	5	19	288	11	1.00	2	1		1	4	-	3			1	1	1	3	-	3
5955	4506457	Q14257	RCN2	reticulocalbin 2	0	0	6	2	5	6	19	288	8	0.99					0	-	0		5	3		2	10	-	8
58494	10864029	P57087	JAM2	junctional adhesion molecule 2	0	0	5	5	5	4	19	288	8	1.00	2		1		3	-	3		1	1	3	2	7	-	6
60559	11345462	P61009	SPCS3	signal peptidase complex subunit 3	2	2	6	6	2	4	18	-	7		3	1	2	4	10	-	4		5	7	7	8	27	207	9	0.78
286410	40316839	Q8NB49	ATP11C	ATPase, class VI, type 11C	0	0	7	1	4	6	18	-	10		5	4	5	3	17	249	13	1.00	9	8	4	4	25	209	16	1.00
79572	148839292	Q9H7F0	ATP13A3	ATPase type 13A3	0	0	6		3	9	18	-	9		3	3	12	3	21	245	12	1.00	6	11	13	15	45	189	26	1.00
6813	188528689	Q15833	STXBP2	syntaxin binding protein 2	1	1	6	1	6	5	18	-	9		5	3	3	4	15	251	11	1.00	4	4	4	5	17	217	12	1.00
56650	11096340	Q9NY35	CLDND1	claudin domain containing 1	0	0	7	3	4	4	18	289	10	1.00	17	17	19	20	73	195	19	1.00	5	14	8	9	36	198	13	1.00
64853	124248539	Q96BJ3	AIDA	axin interactor, dorsalization associated	0	0	4	5	5	4	18	289	6	1.00	1	1	1		3	-	3		3	1	1		5	-	4
25994	153085463	Q9Y241	HIGD1A	HIG1 hypoxia inducible domain family member 1A	2	1	4	5	3	6	18	289	6	0.79					0	-	0		1	5	2	1	9	-	5
51537	51243055	Q9UDX5	MTFP1	mitochondrial fission process 1	1	1	3	5	4	6	18	289	6	1.00					0	-	0		2	1		1	4	-	4
374291	187281616	O75251	NDUFS7	NADH:ubiquinone oxidoreductase core subunit S7	2	1	6	4	4	4	18	289	7	0.81	2	3	2	6	13	-	7		4	4	3	5	16	-	7
51491	148747209	Q9Y3C1	NOP16	NOP16 nucleolar protein	2	2	6	1	4	6	17	-	4				2		2	-	2		6	9	9	10	34	200	12	0.92
219771	190341110	Q8ND76	CCNY	cyclin Y	0	0	2	5	6	4	17	290	7	0.99			3	2	5	-	2		2	4	4	3	13	221	7	0.99
23265	223718046	Q9UPT5	EXOC7	exocyst complex component 7	0	0	2	4	5	6	17	290	9	0.99	2	6	4	4	16	250	13	0.99	3	4	5	5	17	217	16	1.00
55607	261244900	Q9ULJ8	PPP1R9A	protein phosphatase 1 regulatory subunit 9A	0	0	7	4	2	4	17	290	8	0.99	5	6	10	9	30	236	19	1.00	5	5	4	7	21	213	20	1.00
203286	67906195	Q68DC2	ANKS6	ankyrin repeat and sterile alpha motif domain containing 6	0	0	2	7	4	4	17	290	8	0.99	4	8	6	6	24	242	16	1.00	8	8	3	4	23	211	16	1.00
134492	21687129	Q8WVJ2	NUDCD2	NudC domain containing 2	1	0	3	3	5	6	17	290	7	1.00			1		1	-	1		4	4	6	5	19	215	8	1.00
63916	19718769	Q96JJ3	ELMO2	engulfment and cell motility 2	1	1	4	3	5	5	17	290	8	1.00		2	6	4	12	-	9		3	7	5	6	21	213	13	1.00
56997	34147522	Q8NI60	ADCK3	aarF domain containing kinase 3	3	1	5	3	4	5	17	-	10		6	6	6	6	24	242	16	0.81	2	3	1	1	7	-	5
134957	189217897	Q5T5C0	STXBP5	syntaxin binding protein 5 (tomosyn)	1	0	3	5	3	6	17	290	11	1.00	8	5	5	3	21	245	15	1.00	5	1	2		8	-	7
1347	262118227	P14406	COX7A2	cytochrome c oxidase subunit VIIa polypeptide 2 (liver)	1	1	5	4	6	2	17	290	5	0.99			1		1	-	1		2	2	2	1	7	-	4
5420	33598950	O00592	PODXL	podocalyxin-like	0	0	5	4	5	3	17	290	8	1.00	3	2			5	-	2				4	2	6	-	3
285282	62751417	Q5HYI8	RABL3	RAB, member of RAS oncogene family-like 3	2	1	6	5	5		16	-	6		2	4	4	5	15	-	9		4	5	9	10	28	206	10	0.90
9306	21450785	O14544	SOCS6	suppressor of cytokine signaling 6	0	0	6	4	4	2	16	291	8	0.99		3	7	6	16	-	8		4	2	3	4	13	221	10	0.99
5922	12545408	Q15283	RASA2	RAS p21 protein activator 2	0	0	2	6	3	5	16	291	10	0.99	2		3	2	7	-	6		2	4	8	7	21	213	17	0.99
56776	160707881	Q9NZ56	FMN2	formin 2	0	0	1	6	5	4	16	-	10		6	5	3	5	19	247	14	1.00	6	4	15	17	42	192	22	1.00
1793	4503355	Q14185	DOCK1	dedicator of cytokinesis 1	0	0	5	3	2	6	16	291	7	0.99	7	5	7	4	23	243	18	1.00	6	7	7	9	29	205	22	1.00
389541	56606127	Q0VGL1	C7orf59	late endosomal/lysosomal adaptor, MAPK and MTOR activator 4	1	0	6	5	2	3	16	291	7	0.99			1	2	3	-	2		4	5	3	4	16	218	6	1.00
23499	33188445	Q9UPN3	MACF1	microtubule-actin crosslinking factor 1	2	2	3	4	4	5	16	-	11		3	4	4	5	16	-	15		9	23	26	25	83	153	44	1.00
53616	11497043	Q9P0K1	ADAM22	ADAM metallopeptidase domain 22	0	0	7	5	2	2	16	291	6	0.99	5	2		4	11	-	6		4	5	3	4	16	218	8	1.00
65062	113205075	Q96Q45	TMEM237	transmembrane protein 237	0	0	3	7	4	2	16	-	4	0.99	5	6	7	8	26	240	11	1.00	1	6	7	10	24	-	11
100188893	197927201	Q96B49	TOMM6	translocase of outer mitochondrial membrane 6 homolog (yeast)	0	0	4	6	4	2	16	291	7	0.99					0	-	0			1			1	-	1
84168	14149904	Q9H6X2	ANTXR1	anthrax toxin receptor 1	0	0	3	5	4	4	16	291	10	1.00			4	2	6	-	4		1			1	2	-	2
80031	24234729	Q8NFY4	SEMA6D	sema domain, transmembrane domain (TM), and cytoplasmic domain, (semaphorin) 6D	0	0	2	3	6	4	15	292	7	0.99	4	3	4	2	13	253	10	0.99	2	4	3	2	11	223	10	0.99
643314	149773456	O94854	KIAA0754	KIAA0754	0	0	3	4	2	6	15	292	10	0.99		2	3		5	-	5		4	4	5	2	15	219	12	0.99
6786	21070997	Q13586	STIM1	stromal interaction molecule 1	4	4	3	3	6	3	15	-	7		19	20	16	11	66	201	23	0.92	21	22	17	23	83	153	35	1.00
23187	221219024	Q86UU1	PHLDB1	pleckstrin homology-like domain, family B, member 1	0	0	4	4	5	2	15	292	9	0.99	5	9	4	2	20	246	15	0.99	3	4	5	4	16	218	9	1.00
6319	53759151	O00767	SCD	stearoyl-CoA desaturase (delta-9-desaturase)	1	1	4	4	4	3	15	-	4	1.00	1	1	3	2	7	-	6		3	6	4	3	16	218	6	1.00
253558	42558246	Q6UWP7	LCLAT1	lysocardiolipin acyltransferase 1	1	1	5	5	4	1	15	-	6		3	3	3	2	11	255	8	0.99	1	2	1	2	6	-	6
8501	311771737	O75387	SLC43A1	solute carrier family 43 (amino acid system L transporter), member 1	0	0	7	2	2	4	15	292	7	0.99	2	4	2	4	12	254	8	0.99		2	4	7	13	-	7
3672	31657142	P56199	ITGA1	integrin subunit alpha 1	0	0	6	1	6	2	15	-	10		25	26	19	12	82	186	36	1.00	3	1	4	4	12	-	11
3998	5031873	P49257	LMAN1	lectin, mannose-binding, 1	3	3	5	6		4	15	-	9		13	16	20	23	72	196	31	1.00	3	6	10	12	31	-	17
4723	20149568	P49821	NDUFV1	NADH:ubiquinone oxidoreductase core subunit V1	0	0	4	4	2	5	15	292	10	0.99	6	8	8	3	25	241	15	1.00	4	3	2	1	10	-	7
83657	18702323	Q8TF09	DYNLRB2	dynein, light chain, roadblock-type 2	1	1	6	3	2	4	15	292	6	0.99			3		3	-	1				6		6	-	2
11163	40317632	Q9NZJ9	NUDT4	nudix hydrolase 4	1	1	2	2	5	6	15	292	7	0.99		3	1		4	-	2		2	1	2	1	6	-	5
57655	209969686	Q96CP6	GRAMD1A	GRAM domain containing 1A	1	0	4	7	2	2	15	292	7	0.99	3	1		1	5	-	4		3	1	3	2	9	-	6
92335	260166664	Q7RTN6	STRADA	STE20-related kinase adaptor alpha	0	0	3	4	2	5	14	293	8	0.99	3	4	2	2	11	255	8	0.99	3	3	3	3	12	-	4	1.00
26119	132626790	Q5SW96	LDLRAP1	low density lipoprotein receptor adaptor protein 1	1	1	5	5	3	1	14	-	5		2		3	2	7	-	4		4	4	3	2	13	221	8	0.99
4729	222080062	P19404	NDUFV2	NADH:ubiquinone oxidoreductase core subunit V2	1	0	3	4	3	4	14	293	9	1.00	6	6	2	3	17	249	7	0.99	5	4	4	4	17	217	8	1.00
90102	197313728	Q86SQ0	PHLDB2	pleckstrin homology-like domain, family B, member 2	1	0	8	2	4		14	-	9		3	10	16	14	43	223	30	1.00	4	3	7	10	24	210	16	1.00
9990	110224449	Q9UHW9	SLC12A6	solute carrier family 12 (potassium/chloride transporter), member 6	1	1	3	3	3	5	14	293	9	1.00	7	3	16	9	35	231	16	1.00	5	8	6	11	30	204	21	1.00
10672	24111250	Q14344	GNA13	guanine nucleotide binding protein (G protein), alpha 13	0	0	3	5	4	2	14	293	7	0.99	3		1	2	6	-	5		1	4	2	4	11	-	7
51454	358030327	Q9UBP9	GULP1	GULP, engulfment adaptor PTB domain containing 1	0	0	3	3	2	6	14	293	7	0.99	3	2	2	1	8	-	7			2	3	3	8	-	5
23770	52630440	Q14318	FKBP8	FK506 binding protein 8	3	1	3	3	5	2	13	-	6					1	1	-	1		9	10	8	10	37	197	17	0.94
29924	194272148	Q9Y6I3	EPN1	epsin 1	3	2	4	3	4	2	13	-	10		14	13	13	11	51	215	21	1.00	8	8	9	10	35	199	21	0.91
10681	5729852	O14775	GNB5	guanine nucleotide binding protein (G protein), beta 5	0	0	3	4	2	4	13	294	7	0.99		3	4	2	9	-	8		2	3	3	4	12	222	8	0.99
84896	31377644	Q8NBU5	ATAD1	ATPase family, AAA domain containing 1	0	0	1	4	6	2	13	-	10		4	6	4	4	18	248	9	1.00	3	4	3	3	13	221	8	1.00
22859	41281557	O94910	LPHN1	adhesion G protein-coupled receptor L1	0	0	2	5	3	3	13	294	8	0.99	12	19	25	19	75	193	42	1.00	10	15	15	8	48	186	34	1.00
28971	34147384	Q9H7C9	C11orf67	adipogenesis associated, Mth938 domain containing	0	0	4	4	2	3	13	294	7	0.99	7	4	4	1	16	-	11		3	3	3	4	13	221	7	1.00
9415	4758334	O95864	FADS2	fatty acid desaturase 2	1	1	4	1	6	2	13	-	7		2	4	3	5	14	252	10	0.99			2	2	4	-	4
25945	11386199	Q9NQS3	PVRL3	poliovirus receptor-related 3	0	0	4	4	2	3	13	294	7	0.99	1	1			2	-	2			1			1	-	1
4864	255652944	O15118	NPC1	Niemann-Pick disease, type C1	1	0	3	4	2	4	13	294	6	0.99					0	-	0					1	1	-	1
23760	6912594	P48739	PITPNB	phosphatidylinositol transfer protein beta	0	0	2	4	4	3	13	294	8	0.99					0	-	0						0	-	0
256471	22749525	Q8NHS3	MFSD8	major facilitator superfamily domain containing 8	0	0	2	5	2	4	13	294	7	0.99					0	-	0		2	2		1	5	-	5
27020	238624147	Q9Y639	NPTN	neuroplastin	1	0	4	4	2	3	13	294	7	0.99		2	3	2	7	-	5			1			1	-	1
374383	320461732	Q68D85	B7H6	natural killer cell cytotoxicity receptor 3 ligand 1	0	0	5	3	3	2	13	294	6	0.99	3	2	3	1	9	-	8		3	2	3	1	9	-	8
8540	4501993	O00116	AGPS	alkylglycerone phosphate synthase	1	1	2	3	4	4	13	294	6	0.99			6		6	-	5		1	4			5	-	3
29091	21426793	Q8NFX7	STXBP6	syntaxin binding protein 6 (amisyn)	0	0	2	3	4	4	13	294	7	0.99	1	3	8	4	16	-	8		1	5	3	3	12	-	6
23396	307691174	O60331	PIP5K1C	phosphatidylinositol-4-phosphate 5-kinase, type I, gamma	0	0	2	2	4	4	12	295	5	0.99	1	2	2	3	8	-	7		2	5	5	3	15	219	10	0.99
5291	5453894	P42338	PIK3CB	phosphatidylinositol-4,5-bisphosphate 3-kinase catalytic subunit beta	0	0	4	3	1	4	12	-	7		7	7	5	5	24	242	16	1.00	7	8	11	9	35	199	19	1.00
134510	193083197	Q8WVY7	UBLCP1	ubiquitin like domain containing CTD phosphatase 1	1	1	4	1	5	2	12	-	8			2	5		7	-	6		5	4	5	4	18	216	15	1.00
50488	27436917	Q8N4C8	MINK1	misshapen-like kinase 1	0	0	4	3	3	2	12	295	8	0.99	1	3	5	5	14	-	12		4	8	3	7	22	212	10	1.00
253959	51226124	Q6GYQ0	RALGAPA1	Ral GTPase activating protein, alpha subunit 1 (catalytic)	1	0	1	3	6	2	12	-	6			2	7	7	16	-	12		8	3	10	10	31	203	19	1.00
9526	116517313	O75352	MPDU1	mannose-P-dolichol utilization defect 1	2	1	4	2	3	3	12	-	6		7	4	5	5	21	245	7	0.86	3	5	4	4	16	-	8
8884	256985183	Q9Y289	SLC5A6	solute carrier family 5 (sodium/multivitamin and iodide cotransporter), member 6	0	0	3	4	3	2	12	-	4	0.99	6	10	4	6	26	240	7	1.00	2		1	1	4	-	3
8508	193211616	Q9BPW8	NIPSNAP1	nipsnap homolog 1 (C. elegans)	1	1	2	4	4	2	12	295	5	0.99	1	1	2	1	5	-	5			1		2	3	-	2
9693	7657261	Q9Y4G8	RAPGEF2	Rap guanine nucleotide exchange factor 2	0	0	2	2	5	3	12	295	6	0.99	2	2	1	2	7	-	7		5	3		1	9	-	6
387597	40786420	Q71H61	ILDR2	immunoglobulin-like domain containing receptor 2	0	0	5	4	1	1	11	-	8		6	5	6	7	24	242	14	1.00	8	5	7	10	30	204	22	1.00
153090	41281683	Q5VWQ8	DAB2IP	DAB2 interacting protein	0	0	2	5	3	1	11	-	6		12	7	11	9	39	227	27	1.00	7	7	14	9	37	197	27	1.00
25816	117676365	O95379	TNFAIP8	TNF alpha induced protein 8	2	1	4	1	2	4	11	-	7		4	5	6	7	22	244	8	0.88					0	-	0
65010	94721253	Q9BXS9	SLC26A6	solute carrier family 26 (anion exchanger), member 6	0	0	2	4	5		11	-	3		2	3	6	5	16	250	8	0.99	1	3	1	1	6	-	4
125488	116256462	Q8N584	TTC39C	tetratricopeptide repeat domain 39C	0	0	4	2	2	3	11	296	8	0.99	15	17	16	16	64	203	19	1.00					0	-	0
6575	380503859	Q08357	SLC20A2	solute carrier family 20 (phosphate transporter), member 2	0	0	5	2	2	2	11	296	7	0.98	3	5	8	5	21	245	14	1.00	1	5	5	8	19	-	15
51128	75709204	Q9Y6B6	SAR1B	secretion associated, Ras related GTPase 1B	0	0		7	4		11	-	4		6	6	4	6	22	244	8	1.00	9	7			16	-	7
9166	37694065	O00559	EBAG9	estrogen receptor binding site associated, antigen, 9	0	0	2	4	2	3	11	296	6	0.99	8	7	5	4	24	242	7	1.00	5	4	1	1	11	-	5
80790	194018550	Q8IY22	CMIP	c-Maf inducing protein	0	0	3	2	3	3	11	296	8	0.99					0	-	0		2				2	-	2
7335	383872480	Q13404	UBE2V1	ubiquitin conjugating enzyme E2 variant 1	1	1	3	3	2	3	11	296	7	0.99					0	-	0			1	2	2	5	-	4
27350	22907039	Q9NRW3	APOBEC3C	apolipoprotein B mRNA editing enzyme, catalytic polypeptide-like 3C	0	0	2	2	5	2	11	296	5	0.98		4	2		6	-	4			1			1	-	1
10079	65301139	O75110	ATP9A	ATPase, class II, type 9A	1	0	2	2	3	4	11	296	7	0.99		2	4	1	7	-	6		2	2			4	-	3
5865	19923750	P20337	RAB3B	RAB3B, member RAS oncogene family	1	1	2	2	6		10	-	4		5	3	2	2	12	254	7	0.99	2	2	6	5	15	219	9	0.99
151011	21945064	Q9P0V9	SEPT10	septin 10	1	1	1	2	5	2	10	-	5		4	8	7	6	25	241	17	1.00	4	5	3	2	14	220	10	0.99
55706	271398350	Q9BTX1	TMEM48	NDC1 transmembrane nucleoporin	4	3	1	1	3	5	10	-	6		20	20	14	13	67	200	34	1.00	16	21	12	13	62	172	28	0.99
23002	21071077	Q9Y4D1	DAAM1	dishevelled associated activator of morphogenesis 1	0	0	3	4		3	10	-	7		2	3	7	8	20	246	15	0.99	5	8	9	8	30	204	23	1.00
84445	45331215	Q9BRK4	LZTS2	leucine zipper, putative tumor suppressor 2	0	0	3	4	1	2	10	-	4		7	4	6	6	23	243	19	1.00	6	4	3	7	20	214	10	1.00
26504	94681046	Q6P4Q7	CNNM4	cyclin and CBS domain divalent metal cation transport mediator 4	0	0	4	2	3	1	10	-	7		3	4	7	8	22	244	14	1.00	15	10	10	11	46	188	26	1.00
41	21536349	P78348	ASIC1	acid sensing ion channel subunit 1	0	0	2	4	4		10	-	5		3	4	8	8	23	243	10	1.00	6	8	8	7	29	205	13	1.00
8634	195927044	O00442	RTCD1	RNA 3'-terminal phosphate cyclase	1	1	1	2	5	2	10	-	5		3	4	4	3	14	252	7	1.00	6	7	3	6	22	212	14	1.00
126695	282399147	Q8NAX2	C1orf172	keratinocyte differentiation factor 1	0	0	3	5		2	10	-	4		4		4	3	11	-	7		5	6	7	4	22	212	11	1.00
26092	389886539	Q5JTV8	TOR1AIP1	torsin A interacting protein 1	4	3	2	2	5	1	10	-	6		13	18	10	12	53	213	27	0.93	5	8	11	14	38	-	23
117583	119120897	Q8TEW8	PARD3B	par-3 family cell polarity regulator beta	0	0	4	3	3		10	-	6		7	3	5	4	19	247	13	1.00	4	1	2	3	10	-	9
5818	42560237	Q15223	PVRL1	poliovirus receptor-related 1 (herpesvirus entry mediator C)	0	0	4	2	2	2	10	297	5	0.98	4	3	3	3	13	253	9	1.00	1	2	3	3	9	-	6
3556	268840214	Q9NPH3	IL1RAP	interleukin 1 receptor accessory protein	0	0	2	3	2	3	10	297	7	0.99	1			1	2	-	2		1	1	3	1	6	-	5
9926	7661996	Q92604	LPGAT1	lysophosphatidylglycerol acyltransferase 1	0	0	4	1	4		9	-	3					2	2	-	1		5	2	4	4	15	219	10	0.99
10640	5730037	O00471	EXOC5	exocyst complex component 5	0	0	4	3	2		9	-	8		2	2	3		7	-	5		10	12	2	4	28	206	16	0.99
2066	110825958	Q15303	ERBB4	erb-b2 receptor tyrosine kinase 4	0	0	3	2	4		9	-	6				4	2	6	-	5		2	4	5	5	16	218	8	0.99
9052	4506403	Q8NFJ5	GPRC5A	G protein-coupled receptor, class C, group 5, member A	0	0	2	3	1	3	9	-	4		3	3	4	4	14	-	4	1.00	4	4	3	4	15	219	6	1.00
6817	29540531	P50225	SULT1A1	sulfotransferase family 1A member 1	4	3	3	1	3	2	9	-	8		20	11	17	16	64	203	26	0.98	13	17	16	17	63	171	22	1.00
10211	5031699	O75955	FLOT1	flotillin 1	1	1	2	1	4	2	9	-	7		6	3	9	8	26	240	21	1.00	5	6	6	4	21	213	15	1.00
23654	149363636	O15031	PLXNB2	plexin B2	0	0	3	4		2	9	-	5		1	3	3	5	12	-	12		5	6	6	6	23	211	16	1.00
112	10181096	O43306	ADCY6	adenylate cyclase 6	0	0		3	3	3	9	-	6				3	5	8	-	8		5	6	5	6	22	212	12	1.00
55967	10092657	Q9UI09	NDUFA12	NADH:ubiquinone oxidoreductase subunit A12	0	0	3		2	4	9	-	5		6	5	5	6	22	244	11	1.00	5	4		5	14	-	4
7381	316983136	P14927	UQCRB	ubiquinol-cytochrome c reductase binding protein	0	0	2	2	2	3	9	298	5	0.98					0	-	0			1			1	-	1
10157	13027640	Q9UDR5	AASS	aminoadipate-semialdehyde synthase	1	1	2	2	3	2	9	298	6	0.98	1	2	2		5	-	5					3	3	-	3
54919	157388904	Q86Y56	HEATR2	dynein, axonemal, assembly factor 5	0	0	2	1	2	3	8	-	5		3	2	4	3	12	254	11	0.99	4	8	5	2	19	215	13	0.99
54549	222352127	Q58EX2	SDK2	sidekick cell adhesion molecule 2	0	0	2		2	4	8	-	4		5	7	5	6	23	243	17	1.00	2	9	2	4	17	217	10	0.99
1601	148491082	P98082	DAB2	Dab, mitogen-responsive phosphoprotein, homolog 2 (Drosophila)	0	0	2		3	3	8	-	4		1		1	1	3	-	3		6	4	2	3	15	219	11	0.99
91768	154759423	Q8TDN4	CABLES1	Cdk5 and Abl enzyme substrate 1	1	1	3	3		2	8	-	4		6	5	5	4	20	246	11	1.00	9	13	7	4	33	201	22	1.00
8516	49170034	P53708	ITGA8	integrin subunit alpha 8	0	0		7		1	8	-	4		12	8	9	10	39	227	21	1.00	7	6	12	12	37	197	21	1.00
637	347300410	P55957	BID	BH3 interacting domain death agonist	1	1	2	2	2	2	8	-	4	0.98					0	-	0		6	3	3	5	17	217	7	1.00
80301	303519091	Q8TD55	PLEKHO2	pleckstrin homology domain containing O2	0	0	3	2	1	2	8	-	5						0	-	0		7	8	3	4	22	212	10	1.00
137964	30520329	Q86UL3	AGPAT6	glycerol-3-phosphate acyltransferase 4	1	1		2	3	3	8	-	4				4	4	8	-	7		9	9	8	4	30	204	13	1.00
94134	26986534	Q8IWW6	ARHGAP12	Rho GTPase activating protein 12	2	1			3	5	8	-	5		3	7	11	7	28	238	20	0.88		3	4	7	14	-	13
26051	28626517	Q96T49	PPP1R16B	protein phosphatase 1 regulatory subunit 16B	0	0	1	3	2	2	8	-	4		2	6	5	3	16	250	12	0.99	3	1	2	3	9	-	8
79568	239582772	Q8WWC4	C2orf47	chromosome 2 open reading frame 47	1	0	2		6		8	-	3		3	2	4	4	13	253	8	0.99	1				1	-	1
9791	7662647	P48651	PTDSS1	phosphatidylserine synthase 1	1	1	4	2	2		8	-	4		3	4	7	4	18	248	11	1.00		1	2	4	7	-	5
55676	21687224	Q6NXT4	SLC30A6	solute carrier family 30 (zinc transporter), member 6	3	2			6	2	8	-	3		29	27	33	28	117	158	35	1.00	3	6	3		12	-	7
114034	156564398	Q96GM8	TOE1	target of EGR1, member 1 (nuclear)	1	1	2	1		4	7	-	4		4	8	7	3	22	244	13	1.00	4	2	5	5	16	218	8	0.99
10948	260763902	Q14849	STARD3	StAR related lipid transfer domain containing 3	0	0	3		2	2	7	-	3				1		1	-	1		2	3	2	4	11	223	5	0.99
1889	164519136	P42892	ECE1	endothelin converting enzyme 1	0	0	4	2	1		7	-	5		1	1	3	1	6	-	5		4	5	7	2	18	216	9	0.99
23164	50980301	Q6WCQ1	MPRIP	myosin phosphatase Rho interacting protein	3	2		2	3	2	7	-	5		5	10	22	18	55	211	29	0.77	10	22	16	14	62	172	38	1.00
64943	12597653	Q9H857	NT5DC2	5'-nucleotidase domain containing 2	1	0	1		3	3	7	-	5		5	3	3	2	13	253	10	0.99	8	4	7	6	25	209	20	1.00
83605	13899275	Q9BSQ5	CCM2	cerebral cavernous malformation 2	0	0	2	3	2		7	-	6		5	9	8	6	28	238	15	1.00	6	5	3	7	21	213	17	1.00
9527	4758456	O95249	GOSR1	golgi SNAP receptor complex member 1	2	1		5	2		7	-	4		6	3	10	9	28	238	17	0.87	1	4	2	1	8	-	6
2762	359718934	O60547	GMDS	GDP-mannose 4,6-dehydratase	1	0	2		2	3	7	-	3		3	2	3	4	12	254	10	0.99				1	1	-	1
133308	47271479	Q86UD5	SLC9B2	solute carrier family 9, subfamily B (NHA2, cation proton antiporter 2), member 2	0	0	1	2	2	2	7	-	4		2	5	4	4	15	251	9	0.99	2	5		2	9	-	7
9854	42716277	O14523	C2CD2L	C2CD2-like	0	0	3	2		2	7	-	4		3	3	2	3	11	255	8	0.99	1	2	3	3	9	-	9
6522	156071474	P04920	SLC4A2	solute carrier family 4 (anion exchanger), member 2	0	0	2		5		7	-	4		5	6	4	4	19	247	12	1.00	1	6	5	4	16	-	13
4282	4505185	P14174	MIF	macrophage migration inhibitory factor (glycosylation-inhibiting factor)	2	2	2	1	1	2	6	-	4		2		2		4	-	2		6	8	7	9	30	204	8	0.88
8997	148839466	O60229	KALRN	kalirin, RhoGEF kinase	0	0	3	1	1	1	6	-	4						0	-	0		3	3	3	6	15	221	6	0.99
5034	20070125	P07237	P4HB	prolyl 4-hydroxylase, beta polypeptide	1	0			3	3	6	-	4						0	-	0		5	2	6	3	16	218	12	0.99
8907	14210504	Q9BXS5	AP1M1	adaptor related protein complex 1 mu 1 subunit	1	0	1	1	3	1	6	-	5		4	5	2	1	12	-	9		2	3	5	3	13	221	9	0.99
2054	37577162	P32856	STX2	syntaxin 2	0	0		1	3	2	6	-	4		2		5	5	12	-	9		2	3	2	3	10	224	8	0.99
56262	187829871	Q8IWT6	LRRC8A	leucine-rich repeat containing 8 family member A	0	0	2		2	2	6	-	5		4	11	6	3	24	242	14	1.00	13	8	7	3	31	203	20	1.00
5290	54792082	P42336	PIK3CA	phosphatidylinositol-4,5-bisphosphate 3-kinase catalytic subunit alpha	0	0	2	4			6	-	4		7	12	12	7	38	228	19	1.00	7	9	6	12	34	200	20	1.00
81542	151101292	Q9H3N1	TMX1	thioredoxin-related transmembrane protein 1	1	1	2	2		2	6	-	3		1	1	1	2	5	-	4		4	3	7	7	21	213	10	1.00
160518	122891862	Q6ZUT9	DENND5B	DENN/MADD domain containing 5B	1	0	1	2		3	6	-	3		3	4	3		10	-	7		3	5	8	3	19	215	11	1.00
51125	291621680	Q7Z5G4	GOLGA7	golgin A7	0	0	2	2	1		5	-	4		1		1	2	4	-	3		2	3	3	2	10	224	6	0.99
25912	14149688	Q9BWL3	C1orf43	chromosome 1 open reading frame 43	0	0	3	2			5	-	2		3	2	2	3	10	256	8	0.99	5	6	3	5	19	215	8	1.00
9855	7662310	O94887	FARP2	FERM, ARH/RhoGEF and pleckstrin domain protein 2	1	0		3	2		5	-	3		5	5	4	6	20	246	11	1.00	6	8	10	10	34	200	16	1.00
8671	148596928	Q9Y6R1	SLC4A4	solute carrier family 4 (sodium bicarbonate cotransporter), member 4	2	0		1		4	5	-	3		5	4	6	4	19	247	11	0.83	3	4	6	3	16	-	12
154043	74316006	Q6P9H4	CNKSR3	CNKSR family member 3	0	0	2	2	1		5	-	3		4	6	2	3	15	251	8	0.99		3		1	4	-	4
6811	347658920	Q13190	STX5	syntaxin 5	4	2	1		2	1	4	-	3		12	12	12	13	49	217	25	0.99	11	10	10	10	41	193	21	0.94
10728	23308579	Q15185	PTGES3	prostaglandin E synthase 3	2	1	2			2	4	-	3		8	6	3	2	19	-	4		6	7	10	11	34	200	7	0.97
3177	38708299	Q14542	SLC29A2	solute carrier family 29 (equilibrative nucleoside transporter), member 2	0	0		2	2		4	-	2				3	3	6	-	2		4	5	3	6	18	216	5	1.00
550	31712030	Q9Y679	AUP1	ancient ubiquitous protein 1	0	0	2	2			4	-	3				6	4	10	-	5		6	4	7	3	20	214	8	1.00
91010	119120861	Q8IVF7	FMNL3	formin like 3	0	0		4			4	-	2		3	5	4		12	-	6		6	7	10	10	33	201	21	1.00
7204	45439359	O75962	TRIO	trio Rho guanine nucleotide exchange factor	3	3			4		4	-	2		6	10	17	7	40	-	25		15	23	22	24	84	152	48	1.00
1468	20149598	Q9UBX3	SLC25A10	solute carrier family 25 (mitochondrial carrier; dicarboxylate transporter), member 10	4	2		4			4	-	1		15	16	9	11	51	215	17	0.94	4	6	2	5	17	-	8
56479	236461719	Q9NR82	KCNQ5	potassium channel, voltage gated KQT-like subfamily Q, member 5	0	0		1	2	1	4	-	3		2	2	5	5	14	252	8	0.99	3	3	1	2	9	-	6
64097	87042275	Q9HCS5	EPB41L4A	erythrocyte membrane protein band 4.1 like 4A	0	0		2	1		3	-	2		2	2		1	5	-	3		2	5	2	2	11	223	9	0.98
5332	289547589	Q15147	PLCB4	phospholipase C beta 4	0	0		3			3	-	2		3	2	3	2	10	256	10	0.99	3	2	5	8	18	216	13	0.99
221935	119220552	Q7Z5N4	SDK1	sidekick cell adhesion molecule 1	0	0			3		3	-	2		3	3	5	5	16	250	14	1.00	2	8	6	7	23	211	17	0.99
207	62241011	P31749	AKT1	v-akt murine thymoma viral oncogene homolog 1	0	0			2	1	3	-	2		2	3	4	3	12	254	8	0.99	5	5	4	3	17	217	10	1.00
55737	17999541	Q96QK1	VPS35	VPS35 retromer complex component	2	1	2				2	-	2		1				1	-	1		6	11	11	8	36	198	21	0.98
92799	223005950	Q8TBC3	SHKBP1	SH3KBP1 binding protein 1	0	0	1	1			2	-	2		5	7	3	2	17	249	9	0.99					0	-	0
57513	217416347	Q8WXE0	CASKIN2	CASK interacting protein 2	2	1	2				2	-	1		5	7	7	9	28	238	22	0.94	4	8	4	4	20	214	16	0.82
9722	258613965	O75052	NOS1AP	nitric oxide synthase 1 adaptor protein	0	0	2				2	-	1		9	3	6	9	27	239	17	1.00	2	2	3	4	11	223	9	0.99
55781	229331967	Q9BVS4	RIOK2	RIO kinase 2	0	0	2				2	-	1		1	2	2	1	6	-	4		2	4	4	7	17	217	13	0.99
2771	261878575	P04899	GNAI2	guanine nucleotide binding protein (G protein), alpha inhibiting activity polypeptide 2	1	0	1	1			2	-	2			1		1	2	-	2		3	6	2	3	14	220	9	0.99
5585	47132589	Q16512	PKN1	protein kinase N1	1	1			2		2	-	1				1		1	-	1		5	3	2	3	13	221	9	0.99
10328	5174615	O43402	COX4NB	ER membrane protein complex subunit 8	1	1		2			2	-	2				3	2	5	-	4		7	7	4	2	20	214	7	0.99
10159	15011918	O75787	ATP6AP2	ATPase, H+ transporting, lysosomal accessory protein 2	0	0	2				2	-	1		11	11	13	8	43	223	24	1.00	13	14	13	11	51	183	25	1.00
29956	31077094	Q96G23	CERS2	ceramide synthase 2	1	0	2				2	-	1		9	9	6	6	30	236	12	1.00	5	7	6	7	25	209	13	1.00
6745	169404009	P43307	SSR1	signal sequence receptor, alpha	0	0			2		2	-	1						0	-	0		6	7	4	4	21	213	5	1.00
115207	19923973	Q96CX2	KCTD12	potassium channel tetramerization domain containing 12	1	1	2				2	-	1		1	1	1	3	6	-	5		9	6	10	9	34	200	16	1.00
201595	30578410	Q8TCJ2	STT3B	STT3B, subunit of the oligosaccharyltransferase complex (catalytic)	1	1	2				2	-	1		1	3	11	10	25	-	13		5	3	8	10	26	208	12	1.00
158747	22749197	Q8NHP6	MOSPD2	motile sperm domain containing 2	1	0				2	2	-	1		1		4		5	-	3		3	4	4	5	16	219	7	1.00
2799	4504061	P15586	GNS	glucosamine (N-acetyl)-6-sulfatase	0	0		2			2	-	2			1			1	-	1		5	7	3	5	20	214	10	1.00
22873	39725957	Q86YF9	DZIP1	DAZ interacting zinc finger protein 1	0	0		2			2	-	1		4	2	5	3	14	252	13	0.99	2	1	1	1	5	-	5
10390	5174415	Q9Y6K0	CEPT1	choline/ethanolamine phosphotransferase 1	1	1	2				2	-	1		9	10	7	6	32	234	6	1.00	2		3		5	-	2
7355	109948265	P78381	SLC35A2	solute carrier family 35 (UDP-galactose transporter), member A2	0	0	1		1		2	-	2		5	3	4	4	16	250	9	1.00	1				1	-	1
81848	188595697	Q9C004	SPRY4	sprouty RTK signaling antagonist 4	0	0	2				2	-	1		4	4	5	3	16	250	6	1.00	1	3		1	5	-	4
22839	34335253	Q9Y2H0	DLGAP4	discs, large (Drosophila) homolog-associated protein 4	0	0	1		1		2	-	2		4	6	5	4	19	247	14	1.00	1	6	1	3	11	-	10
10682	5729810	Q15125	EBP	emopamil binding protein (sterol isomerase)	1	0			1		1	-	1		12	11	11	14	48	218	12	1.00	4	3	1	2	10	-	5
23190	24307965	Q92575	UBXN4	UBX domain protein 4	2	2	1				1	-	1		9	16	10	7	42	224	9	0.97	14	18	11	11	54	180	10	1.00
55901	40805852	Q9NS62	THSD1	thrombospondin type 1 domain containing 1	0	0	1				1	-	1		4	6	2	3	15	251	10	0.99	3	3	5	6	17	217	11	1.00
54795	21314671	Q8TD43	TRPM4	transient receptor potential cation channel, subfamily M, member 4	0	0				1	1	-	1		5	3	7	6	21	245	13	1.00	4	6	5	4	19	215	12	1.00
4521	40288274	P36639	NUDT1	nudix hydrolase 1	1	0	1				1	-	1				1		1	-	1		3	4	3	3	13	221	5	1.00
51571	377520143	Q9NUQ9	FAM49B	family with sequence similarity 49 member B	1	1		1			1	-	1						0	-	0		3	3	4	3	13	221	10	1.00
4763	109826564	P21359	NF1	neurofibromin 1	1	1				1	1	-	1			1	3	2	6	-	5		5	5	5	4	19	215	13	1.00
25824	32455260	P30044	PRDX5	peroxiredoxin 5	2	2					0	-	0		4	1			5	-	3		7	8	8	9	32	202	16	0.95
22898	50345870	A2RUS2	DENND3	DENN/MADD domain containing 3	0	0					0	-	0					3	3	-	3		6	5	5	3	19	215	14	1.00
10206	16445412	O60858	TRIM13	tripartite motif containing 13	2	2					0	-	0		2	5	4	5	16	-	8		14	17	13	16	60	174	17	1.00
7157	120407068	P04637	TP53	tumor protein p53	3	3					0	-	0		14	11	10	8	43	223	11	0.86					0	-	0
9639	62548864	O15013	ARHGEF10	Rho guanine nucleotide exchange factor 10	1	1					0	-	0		5	2	6	7	20	246	14	0.99	2	2	1	1	6	-	5
7314	11024714	P0CG47	UBB	ubiquitin B	3	2					0	-	0		16	25	20	21	82	186	20	1.00					0	-	0
4259	4758714	O14880	MGST3	microsomal glutathione S-transferase 3	2	1					0	-	0						0	-	0		3	5	5	5	18	216	5	0.80
60481	11464975	Q9NYP7	ELOVL5	ELOVL fatty acid elongase 5	2	2					0	-	0		6	8	14	9	37	229	6	0.91	6	9	7	7	29	205	7	0.86
54940	119874205	Q9NX40	OCIAD1	OCIA domain containing 1	2	2					0	-	0		17	17	8	8	50	216	8	0.98	6	8	7	7	28	206	10	0.86
3163	187761307	P30519	HMOX2	heme oxygenase 2	4	4					0	-	0		5		10	6	21	-	12		12	17	12	17	58	176	21	0.94
23545	42741679	Q9Y487	ATP6V0A2	ATPase, H+ transporting, lysosomal V0 subunit a2	0	0					0	-	0						0	-	0		2	4	2	2	10	224	7	0.98
79065	116089282	Q7Z3C6	ATG9A	autophagy related 9A	0	0					0	-	0		3		2	2	7	-	6		4	2	2	2	10	224	7	0.98
84231	45594312	Q6Q0C0	TRAF7	TNF receptor associated factor 7	0	0					0	-	0		5	4	5	1	15	-	11		4	2	2	2	10	224	8	0.98
783	147898681	Q08289	CACNB2	calcium channel, voltage-dependent, beta 2 subunit	0	0					0	-	0		12	14	14	12	52	214	30	1.00	2	4	5	6	17	217	13	0.99
55218	301129155	Q9NVH0	EXD2	exonuclease 3'-5' domain containing 2	1	1					0	-	0		4	3	6	3	16	250	12	1.00	5	5	2	3	15	219	10	0.99
55256	171460928	Q9BV57	ADI1	acireductone dioxygenase 1	1	1					0	-	0						0	-	0		2	2	4	3	11	223	9	0.99
55773	217035118	Q9NUY8	TBC1D23	TBC1 domain family member 23	1	0					0	-	0						0	-	0		2	4	3	2	11	223	9	0.99
55591	155030244	Q9HBM0	VEZT	vezatin, adherens junctions transmembrane protein	1	0					0	-	0						0	-	0		2	2	4	5	13	221	7	0.99
10384	261490684	O00478	BTN3A3	butyrophilin subfamily 3 member A3	0	0					0	-	0			1		2	3	-	3		2	3	2	3	10	224	9	0.99
54805	40068053	Q9H8M5	CNNM2	cyclin and CBS domain divalent metal cation transport mediator 2	0	0					0	-	0		6	6	1	3	16	-	9		2	2	3	5	12	222	11	0.99
8527	25777596	Q16760	DGKD	diacylglycerol kinase delta	1	1					0	-	0		1	1	2	2	6	-	5		2	3	4	5	14	220	13	0.99
51726	7706495	Q9UBS4	DNAJB11	DnaJ heat shock protein family (Hsp40) member B11	0	0					0	-	0			1	1	2	4	-	4		3	4	4	2	13	221	7	0.99
54463	21361617	Q9H6L5	FAM134B	family with sequence similarity 134 member B	1	0					0	-	0		2		3	3	8	-	5		4	2	4	3	13	221	9	0.99
4040	148727288	O75581	LRP6	LDL receptor related protein 6	0	0					0	-	0		1	3			4	-	4		6	4	2	3	15	219	13	0.99
10463	57164948	Q6PML9	SLC30A9	solute carrier family 30 (zinc transporter), member 9	1	0					0	-	0				2		2	-	2		3	2	3	2	10	224	10	0.99
51635	7706318	Q9Y394	DHRS7	dehydrogenase/reductase (SDR family) member 7	2	1					0	-	0		9	8	5	7	29	237	15	0.95	15	19	12	12	58	176	23	1.00
537	17136148	Q15904	ATP6AP1	ATPase, H+ transporting, lysosomal accessory protein 1	1	0					0	-	0		4	5	12	12	33	233	15	1.00	6	9	10	10	35	199	17	1.00
11118	308736964	P78410	BTN3A2	butyrophilin subfamily 3 member A2	0	0					0	-	0		5	8	4	4	21	245	11	1.00	4	5	3	4	16	218	10	1.00
9231	95089461	Q8TDM6	DLG5	discs, large homolog 5 (Drosophila)	0	0					0	-	0		10	14	14	14	52	214	37	1.00	4	6	7	7	24	210	17	1.00
9312	27436974	Q92953	KCNB2	potassium channel, voltage gated Shab related subfamily B, member 2	0	0					0	-	0		9	7	16	12	44	222	23	1.00	10	8	11	9	38	196	23	1.00
84061	215983058	Q9H0U3	MAGT1	magnesium transporter 1	0	0					0	-	0		4	3	4	4	15	251	9	1.00	5	4	5	5	19	215	9	1.00
9057	115648022	Q92536	SLC7A6	solute carrier family 7 (amino acid transporter light chain, y+L system), member 6	0	0					0	-	0				1		1	-	1		4	4	3	4	15	219	8	1.00
114790	116235474	Q8N1F8	STK11IP	serine/threonine kinase 11 interacting protein	0	0					0	-	0						0	-	0		3	3	4	6	16	218	13	1.00
11022	145312246	Q9Y2W6	TDRKH	tudor and KH domain containing	1	0					0	-	0						0	-	0		6	5	5	7	23	211	14	1.00
84803	21362092	Q53EU6	AGPAT9	lysophosphatidylcholine acyltransferase 1	0	0					0	-	0		2	4		4	10	-	8		4	4	8	10	26	208	15	1.00
116984	21264592	Q8WZ64	ARAP2	ArfGAP with RhoGAP domain, ankyrin repeat and PH domain 2	0	0					0	-	0		3		3	1	7	-	7		4	8	7	3	22	212	16	1.00
1508	22538431	P07858	CTSB	cathepsin B	1	1					0	-	0			2	5	3	10	-	6		4	4	6	4	18	216	8	1.00
79932	33359221	Q8IZA0	KIAA0319L	KIAA0319-like	0	0					0	-	0		3		1		4	-	4		3	4	5	5	17	217	13	1.00
84230	19923729	Q8TDW0	LRRC8C	leucine-rich repeat containing 8 family member C	0	0					0	-	0		5	1	2	2	10	-	8		4	4	3	4	15	219	10	1.00
10134	213511012	P51572	BCAP31	B-cell receptor-associated protein 31	2	1					0	-	0		6	7	4	4	21	245	7	0.86			1		1	-	1
84245	23943880	Q9BV20	MRI1	methylthioribose-1-phosphate isomerase 1	2	1					0	-	0		5	5	7	5	22	244	16	0.89	6	7	2		15	-	5
54503	47933346	Q8IUH4	ZDHHC13	zinc finger, DHHC-type containing 13	0	0					0	-	0		2	2	2	2	8	258	6	0.98		2			2	-	2
117247	18699730	Q8TF71	SLC16A10	solute carrier family 16 (aromatic amino acid transporter), member 10	0	0					0	-	0		4	2	3	3	12	254	6	0.99	1		1		2	-	2
3693	20127446	P18084	ITGB5	integrin subunit beta 5	1	0					0	-	0		6	4	2	2	14	252	9	0.99	2	2		1	5	-	5
889	31581522	O00522	KRIT1	KRIT1, ankyrin repeat containing	0	0					0	-	0		2	3	3	2	10	256	10	0.99	2				2	-	2
55149	190194365	Q9NVV4	MTPAP	mitochondrial poly(A) polymerase	1	1					0	-	0		4	4	2	3	13	253	9	0.99	1	3		3	7	-	5
9344	4759208	Q9UL54	TAOK2	TAO kinase 2	0	0					0	-	0		2	2	3	3	10	256	8	0.99			1	2	3	-	3
1952	13325064	Q9HCU4	CELSR2	cadherin, EGF LAG seven-pass G-type receptor 2	0	0					0	-	0		4	5	7	5	21	245	11	1.00			1	1	2	-	2
23463	6912430	O60725	ICMT	isoprenylcysteine carboxyl methyltransferase	1	1					0	-	0		4	6	4	5	19	247	8	1.00		1	2	4	7	-	3
79939	164607128	Q96K37	SLC35E1	solute carrier family 35 member E1	0	0					0	-	0		4	4	4	4	16	250	12	1.00			1		1	-	1
7110	110347443	P82094	TMF1	TATA element modulatory factor 1	1	1					0	-	0		3	6	10	7	26	240	18	1.00					0	-	0
23390	103471993	Q8IUH5	ZDHHC17	zinc finger, DHHC-type containing 17	0	0					0	-	0		7	5	3	4	19	247	13	1.00	1		1	1	3	-	3
10478	5453918	O43808	SLC25A17	solute carrier family 25 (mitochondrial carrier; peroxisomal membrane protein, 34kDa), member 17	0	0					0	-	0		3	3	4	3	13	253	9	1.00	4	5		2	11	-	5
6646	357430782	P35610	SOAT1	sterol O-acyltransferase 1	1	0					0	-	0		6	8	16	16	46	220	14	1.00	3	3			6	-	4

## Sheet: Table S2-IP-MS interactome
Table S2. FB-HRAS, FB-NRAS and FB-KRAS IP-MS results. Data are presented as spectral counts detected for each prey protein, as indicated. Two technical replicates were performed on each of two unique biological replicates for each bait protein (for a total of four MS analyses). ProteinProphet confidence score p ≥ 0.85, SAINT score ≥ 0.75. For control runs, only the highest two spectral counts (ou…
							FlagBirA*-HRAS WT							FlagBirA*-NRAS WT							FlagBirA*-KRAS WT
							Pool A		Pool B					Pool A		Pool B					Pool A		Pool B
Gene ID	Protein ID	Uniprot ID	Gene Name	Gene Full Name	Top 2 controls		Tech#1	Tech#2	Tech#1	Tech#2	Total	Total Unique Peptides	SAINT	Tech#1	Tech#2	Tech#1	Tech#2	Total	Total Unique Peptides	SAINT	Tech#1	Tech#2	Tech#1	Tech#2	Total	Total Unique Peptides	SAINT
948469	16131807	P06709	birA	Bifunctional ligase/repressor BirA	10659	10566	9331	9610	3474	3658	26073	110	-	8875	4935	3041	3332	20183	108	-	6251	6458	1995	2381	17085	98	-
3265	194363762	P01112	HRAS	Harvey rat sarcoma viral oncogene homolog	1	0	188	183	148	174	693	13	-	13	7	11	0	31	3	-	4	9	12	10	35	4	-
3845	15718761	P01116	KRAS	Kirsten rat sarcoma viral oncogene homolog	1	1	0	0	0	1	1	1	-	0	0	0	0	0	0	-	141	738	139	132	1150	24	-
4893	4505451	P01111	NRAS	neuroblastoma RAS viral (v-ras) oncogene homolog	0	0	128	128	104	2	362	10	-	1243	809	573	573	3198	34	-	2	0	2	5	9	4	-
653784	NP_001078834.1		MZT2A	mitotic spindle organizing protein 2A	0	0	5	6	2	4	17	4	1.00	1	2	2	1	6	4		5	5	3	3	16	5	1.00
991	NP_001246.2		CDC20	cell division cycle 20	1	1	2	4	3	3	12	4	0.99	7	4	4	4	19	5	1.00	8	3	3	2	16	4	0.99
2023	NP_001419.1		ENO1	enolase 1	48	46	1170	1295	494	583	3542	52	1.00	1258	682	611	637	3188	53	1.00	1099	1104	401	621	3225	52	1.00
10985	NP_006827.1		GCN1L1	GCN1, eIF2 alpha kinase activator homolog	94	79	702	704	390	418	2214	332	1.00	498	325	292	275	1390	291	1.00	532	540	255	271	1598	287	1.00
7277	NP_005991.1		TUBA4A	tubulin alpha 4a	78	77	744	694	212	199	1849	8	0.98	916	355	240	225	1736	9	1.00	786	766	187	188	1927	10
5230	NP_000282.1		PGK1	phosphoglycerate kinase 1	5	4	507	546	294	330	1677	62	1.00	521	274	250	263	1308	65	1.00	383	427	197	256	1263	66	1.00
1434	NP_001307.2		CSE1L	chromosome segregation 1 like	83	79	488	533	319	335	1675	156	1.00	343	200	224	217	984	136	0.75	373	374	190	224	1161	137	0.75
7514	NP_003391.1		XPO1	exportin 1	34	29	438	471	246	311	1466	134	1.00	250	168	146	151	715	114	1.00	277	287	163	152	879	111	1.00
3320	NP_001017963.2		HSP90AA1	heat shock protein 90 alpha family class A member 1	98	96	233	529	282	325	1369	97	0.75	643	352	350	406	1751	106	1.00	505	265	316	337	1423	92	1.00
5216	NP_005013.1		PFN1	profilin 1	32	29	326	325	178	232	1061	27	1.00	328	200	204	206	938	28	1.00	297	305	175	169	946	26	1.00
2288	NP_002005.1		FKBP4	FK506 binding protein 4	54	48	301	316	102	139	858	81	0.75	424	223	138	149	934	70	1.00	378	386	122	134	1020	72
47	NP_001087.2		ACLY	ATP citrate lyase	3	3	259	272	158	167	856	123	1.00	297	185	153	148	783	131	1.00	356	332	191	187	1066	132	1.00
5518	NP_055040.2		PPP2R1A	protein phosphatase 2 scaffold subunit Aalpha	26	26	273	268	87	91	719	62	1.00	173	97	87	85	442	59	1.00	185	162	67	96	510	53	0.94
3843	NP_002262.3		IPO5	importin 5	37	33	216	220	133	138	707	89	1.00	144	81	80	77	382	70		197	206	81	109	593	71	0.75
57510	NP_065801.1		XPO5	exportin 5	18	17	238	225	103	131	697	111	1.00	187	106	79	78	450	91	1.00	174	189	73	79	515	91	1.00
2618	NP_001129477.1		GART	phosphoribosylglycinamide formyltransferase, phosphoribosylglycinamide synthetase, phosphoribosylaminoimidazole synthetase	15	12	201	208	121	137	667	90	1.00	215	133	123	142	613	93	1.00	191	191	101	105	588	89	1.00
23392	NP_001073867.1		KIAA0368	KIAA0368	10	6	221	198	95	110	624	132	1.00	109	68	58	61	296	89	1.00	96	80	74	62	312	87	1.00
10527	NP_006382.1		IPO7	importin 7	27	26	179	190	93	110	572	69	1.00	128	83	68	73	352	55	0.92	206	206	127	117	656	77	1.00
79711	NP_078934.3		IPO4	importin 4	29	27	159	177	98	101	535	96	1.00	128	80	78	69	355	72	0.77	219	212	122	119	672	96	1.00
8833	NP_003866.1		GMPS	guanine monophosphate synthase	37	31	177	163	100	88	528	79	0.97	192	133	111	110	546	83	1.00	194	185	93	96	568	79	1.00
26227	NP_006614.2		PHGDH	phosphoglycerate dehydrogenase	41	38	149	168	100	102	519	55	0.81	189	120	116	118	543	53	1.00	188	180	110	102	580	54	0.97
9918	NP_055680.3		NCAPD2	non-SMC condensin I complex subunit D2	14	11	149	157	85	94	485	119	1.00	122	76	70	81	349	96	1.00	112	118	68	82	380	96	1.00
7407	NP_006286.1		VARS	valyl-tRNA synthetase	19	17	148	147	83	100	478	102	1.00	182	108	97	99	486	92	1.00	191	186	98	102	577	99	1.00
8239	NP_001034679.2		USP9X	ubiquitin specific peptidase 9, X-linked	24	22	156	149	70	83	458	134	1.00	125	69	68	78	340	126	1.00	212	224	121	104	661	172	1.00
3842	NP_002261.3		TNPO1	transportin 1	7	5	133	150	68	98	449	66	1.00	29	23	23	29	104	27	1.00	80	95	62	65	302	50	1.00
55215	NP_001106849.1		FANCI	Fanconi anemia complementation group I	16	9	134	118	83	90	425	106	1.00	79	50	61	61	251	94	1.00	104	96	62	61	323	99	1.00
1315	NP_001137533.1		COPB1	coatomer protein complex subunit beta 1	37	33	129	106	81	97	413	82	0.75	101	71	83	78	333	73		108	115	67	69	359	71
83481	NP_112598.2		EPPK1	epiplakin 1	15	14	114	126	69	76	385	110	1.00	116	54	69	69	308	91	1.00	128	114	44	71	357	103	1.00
3608	NP_004506.2		ILF2	interleukin enhancer binding factor 2	29	27	105	111	78	84	378	48	1.00	145	92	89	88	414	49	1.00	147	137	79	85	448	49	1.00
4893	NP_002515.1		NRAS	NRAS proto-oncogene, GTPase	0	0	128	128	104	2	362	10	1.00	1243	809	573	573	3198	34		2	0	2	5	9	4
55705	NP_060555.2		IPO9	importin 9	15	12	124	121	53	55	353	63	1.00	102	63	50	49	264	57	1.00	160	165	81	72	478	72	1.00
10055	NP_005491.1		SAE1	SUMO1 activating enzyme subunit 1	22	20	113	123	52	57	345	37	0.79	103	63	47	48	261	35		111	112	57	49	329	38
158	NP_001116850.1		ADSL	adenylosuccinate lyase	7	7	115	120	58	51	344	51	1.00	143	85	54	52	334	50	1.00	114	127	43	50	334	49	1.00
5198	NP_036525.1		PFAS	phosphoribosylformylglycinamidine synthase	8	8	113	103	57	63	336	80	1.00	87	63	65	56	271	71	1.00	106	96	57	58	317	76	1.00
51194	NP_001128251.1		IPO11	importin 11	2	2	90	117	63	57	327	57	1.00	39	27	22	20	108	37	1.00	53	53	20	31	157	39	1.00
23534	NP_036602.1		TNPO3	transportin 3	0	0	89	111	61	65	326	61	1.00	40	21	29	17	107	37	1.00	68	50	21	30	169	45	1.00
23513	NP_874365.3		SCRIB	scribbled planar cell polarity protein	18	9	107	97	63	51	318	86	1.00	69	48	26	34	177	53		50	62	15	18	145	42
23165	NP_055950.1		NUP205	nucleoporin 205	16	16	111	94	56	54	315	100	1.00	86	57	64	56	263	98	1.00	119	102	67	55	343	99	1.00
8218	NP_009029.3		CLTCL1	clathrin heavy chain like 1	0	0	101	84	56	69	310	41	1.00	138	0	84	0	222	25		107	98	77	79	361	46	1.00
6897	NP_689508.3		TARS	threonyl-tRNA synthetase	12	9	91	85	65	69	310	65	1.00	97	65	73	65	300	74	1.00	94	82	61	60	297	72	1.00
23039	NP_055839.3		XPO7	exportin 7	0	0	103	113	42	47	305	63	1.00	42	30	24	21	117	38	1.00	66	61	22	23	172	45	1.00
2475	NP_004949.1		MTOR	mechanistic target of rapamycin	2	0	100	92	54	58	304	113	1.00	54	29	14	25	122	52	1.00	74	67	31	23	195	65	1.00
23019	NP_001252541.1		CNOT1	CCR4-NOT transcription complex subunit 1	8	6	99	92	49	59	299	101	1.00	82	45	53	47	227	97	1.00	68	58	55	63	244	102	1.00
23344	NP_056107.1		ESYT1	extended synaptotagmin 1	14	12	97	100	46	51	294	68	1.00	49	26	28	33	136	47		58	72	38	25	193	59	0.75
7879	NP_004628.4		RAB7A	RAB7A, member RAS oncogene family	18	18	92	82	51	67	292	39	1.00	65	41	46	44	196	35		65	64	47	35	211	34
6904	NP_005984.3		TBCD	tubulin folding cofactor D	1	0	89	94	50	57	290	77	1.00	59	30	35	27	151	47	1.00	71	68	28	35	202	59	1.00
3838	NP_002257.1		KPNA2	karyopherin subunit alpha 2	13	13	95	95	45	46	281	54	1.00	81	45	45	49	220	47	1.00	86	67	48	38	239	48	1.00
283820	NP_775885.1		NOMO2	NODAL modulator 2	11	9	97	116	35	30	278	70	1.00	55	28	27	24	134	52		64	76	33	42	215	60	1.00
4173	NP_877423.1		MCM4	minichromosome maintenance complex component 4	8	6	87	91	55	39	272	56	1.00	101	61	52	50	264	63	1.00	90	106	48	54	298	57	1.00
191	NP_000678.1		AHCY	adenosylhomocysteinase	1	1	89	86	48	48	271	55	1.00	92	53	54	53	252	49	1.00	107	102	59	58	326	54	1.00
22820	NP_057212.1		COPG1	coatomer protein complex subunit gamma 1	11	9	96	86	41	48	271	63	1.00	97	57	40	39	233	60	1.00	84	92	46	60	282	73	1.00
8729	NP_001186307.1		GBF1	golgi brefeldin A resistant guanine nucleotide exchange factor 1	1	1	93	88	44	41	266	81	1.00	55	35	19	18	127	51	1.00	67	67	27	31	192	59	1.00
9793	NP_001008938.1		CKAP5	cytoskeleton associated protein 5	4	4	72	83	56	51	262	111	1.00	63	52	37	42	194	91	1.00	70	65	46	40	221	91	1.00
5702	NP_002795.2		PSMC3	proteasome 26S subunit, ATPase 3	18	17	68	78	51	55	252	49	1.00	97	57	54	54	262	58	1.00	105	89	37	43	274	52
54919	NP_060272.3		HEATR2	dynein axonemal assembly factor 5	4	1	69	87	49	45	250	64	1.00	46	32	33	29	140	50	1.00	50	59	39	30	178	56	1.00
4175	NP_005906.2		MCM6	minichromosome maintenance complex component 6	15	14	77	73	39	44	233	55	0.98	91	63	49	46	249	61	1.00	87	90	35	45	257	62	0.77
39	NP_005882.2		ACAT2	acetyl-CoA acetyltransferase 2	12	8	71	81	41	39	232	27	1.00	81	39	30	36	186	24	1.00	65	71	34	34	204	26	1.00
10015	NP_037506.2		PDCD6IP	programmed cell death 6 interacting protein	2	1	79	77	36	35	227	75	1.00	78	48	40	40	206	68	1.00	69	72	38	41	220	72	1.00
5238	NP_001186846.1		PGM3	phosphoglucomutase 3	5	5	69	70	50	35	224	54	1.00	73	45	46	42	206	58	1.00	66	70	40	31	207	54	1.00
8078	NP_003472.2		USP5	ubiquitin specific peptidase 5	14	12	64	80	41	37	222	62	1.00	59	33	35	32	159	60		61	68	34	45	208	60	0.94
23352	NP_065816.2		UBR4	ubiquitin protein ligase E3 component n-recognin 4	29	22	65	61	41	43	210	90		64	33	51	51	199	101		153	143	79	94	469	161	1.00
57136	NP_065392.1		C20orf3	adipocyte plasma membrane associated protein	18	16	59	62	46	48	215	48	0.99	46	28	30	29	133	44		61	49	28	29	167	41
10469	NP_006342.2		TIMM44	translocase of inner mitochondrial membrane 44	15	14	65	67	36	44	212	44	0.82	57	31	35	35	158	36		54	50	33	24	161	38
23358	NP_056121.2		USP24	ubiquitin specific peptidase 24	2	0	64	57	41	44	206	76	1.00	69	30	25	41	165	66	1.00	58	67	35	51	211	75	1.00
5226	NP_002622.2		PGD	phosphogluconate dehydrogenase	1	0	73	56	38	37	204	42	1.00	55	45	29	32	161	34	1.00	72	71	34	34	211	37	1.00
9520	NP_006301.3		NPEPPS	aminopeptidase puromycin sensitive	7	6	65	58	36	42	201	73	1.00	48	32	35	36	151	54	1.00	34	44	42	32	152	47	1.00
6240	NP_001024.1		RRM1	ribonucleotide reductase catalytic subunit M1	3	2	59	64	37	39	199	58	1.00	70	49	39	35	193	54	1.00	52	62	21	20	155	43	1.00
1727	NP_001123291.1		CYB5R3	cytochrome b5 reductase 3	13	13	66	68	27	38	199	37	0.75	19	13	17	12	61	23		42	32	15	18	107	28
64151	NP_071741.2		NCAPG	non-SMC condensin I complex subunit G	12	8	56	57	40	40	193	65	1.00	52	30	38	42	162	58	1.00	74	73	43	46	236	63	1.00
30000	NP_001129667.1		TNPO2	transportin 2	0	0	57	65	38	32	192	27	1.00	17	10	12	7	46	13	1.00	60	42	26	27	155	26	1.00
22872	NP_001070674.1		SEC31A	SEC31 homolog A, COPII coat complex component	0	0	70	66	25	30	191	68	1.00	52	34	27	30	143	60	1.00	63	54	33	30	180	65	1.00
9652	NP_055454.1		TTC37	tetratricopeptide repeat domain 37	5	4	48	58	43	38	187	64	1.00	61	34	39	39	173	64	1.00	59	77	35	38	209	73	1.00
4436	NP_001245210.1		MSH2	mutS homolog 2	9	6	61	60	29	35	185	55	1.00	58	33	31	33	155	52	1.00	61	68	34	39	202	53	1.00
2956	NP_000170.1		MSH6	mutS homolog 6	10	8	53	50	36	45	184	57	1.00	63	36	45	46	190	59	1.00	93	77	48	57	275	68	1.00
50814	NP_001123237.1		NSDHL	NAD(P) dependent steroid dehydrogenase-like	2	2	53	59	36	36	184	25	1.00	35	20	24	21	100	23	1.00	43	42	25	21	131	24	1.00
7389	NP_000365.3		UROD	uroporphyrinogen decarboxylase	0	0	60	71	27	24	182	31	1.00	51	27	30	24	132	30	1.00	51	51	28	29	159	27	1.00
25920	NP_056271.2		COBRA1	negative elongation factor complex member B	2	1	57	57	38	27	179	40	1.00	55	31	25	24	135	31	1.00	61	68	25	30	184	35	1.00
9361	NP_004784.2		LONP1	lon peptidase 1, mitochondrial	9	4	64	59	26	29	178	53	1.00	53	37	28	26	144	49	1.00	77	81	22	22	202	53	0.99
51144	NP_057226.1		HSD17B12	hydroxysteroid 17-beta dehydrogenase 12	13	7	59	45	29	45	178	33	0.95	41	21	25	21	108	31		43	28	16	20	107	25
9894	NP_057195.2		TELO2	telomere maintenance 2	8	8	61	56	31	29	177	60	1.00	59	43	26	25	153	53	1.00	54	58	30	30	172	47	1.00
163	NP_001273.1		AP2B1	adaptor related protein complex 2 beta 1 subunit	14	8	53	56	31	36	176	48	0.95	49	30	28	34	141	51		57	77	49	43	226	59	1.00
9319	NP_004228.1		TRIP13	thyroid hormone receptor interactor 13	11	10	50	48	38	38	174	48	1.00	55	38	37	44	174	49	1.00	54	48	37	39	178	53	1.00
1595	NP_000777.1		CYP51A1	cytochrome P450 family 51 subfamily A member 1	4	4	47	59	30	36	172	35	1.00	22	16	15	20	73	23	1.00	27	28	22	21	98	28	1.00
6117	NP_002936.1		RPA1	replication protein A1	11	10	49	48	40	34	171	43	1.00	56	40	34	35	165	38	1.00	52	64	37	34	187	47	1.00
10526	NP_006381.2		IPO8	importin 8	6	5	52	59	30	30	171	49	1.00	41	23	25	17	106	42	0.99	45	55	24	26	150	44	1.00
23517	NP_056175.3		SKIV2L2	Ski2 like RNA helicase 2	3	3	45	54	34	38	171	50	1.00	39	24	31	33	127	45	1.00	40	37	24	41	142	45	1.00
2222	NP_004453.3		FDFT1	farnesyl-diphosphate farnesyltransferase 1	6	5	57	58	25	30	170	31	1.00	44	28	26	26	124	26	1.00	65	59	33	42	199	34	1.00
9632	NP_004913.2		SEC24C	SEC24 homolog C, COPII coat complex component	1	1	61	65	25	15	166	38	1.00	54	37	17	15	123	34	1.00	61	60	22	18	161	32	1.00
8407	NP_003555.1		TAGLN2	transgelin 2	2	1	53	53	29	30	165	23	1.00	59	35	31	32	157	21	1.00	49	56	21	32	158	22	1.00
873	NP_001748.1		CBR1	carbonyl reductase 1	0	0	48	48	33	34	163	36	1.00	37	34	30	35	136	38	1.00	43	51	25	35	154	42	1.00
25814	NP_001161093.1		ATXN10	ataxin 10	8	7	56	49	24	32	161	35	1.00	42	33	30	30	135	29	1.00	50	57	28	30	165	35	1.00
23511	NP_056169.1		NUP188	nucleoporin 188	10	8	61	53	26	18	158	49		57	34	24	25	140	58	0.94	52	55	27	24	158	62	0.95
23065	NP_055862.1		KIAA0090	ER membrane protein complex subunit 1	5	4	65	55	16	23	159	54	1.00	19	6	14	11	50	26		38	27	18	14	97	42	0.99
25782	NP_036546.2		RAB3GAP2	RAB3 GTPase activating non-catalytic protein subunit 2	4	3	37	54	33	34	158	69	1.00	52	29	31	34	146	66	1.00	63	62	35	39	199	72	1.00
5036	NP_006182.2		PA2G4	proliferation-associated 2G4	5	5	48	51	29	30	158	38	1.00	48	31	31	28	138	38	1.00	41	43	31	35	150	38	1.00
644	NP_000703.2		BLVRA	biliverdin reductase A	0	0	51	39	28	40	158	33	1.00	61	40	39	45	185	35	1.00	37	37	37	32	143	27	1.00
10397	NP_001128714.1		NDRG1	N-myc downstream regulated 1	9	9	51	57	26	24	158	33	0.95	38	15	15	15	83	23		36	31	15	14	96	25
950	NP_005497.1		SCARB2	scavenger receptor class B member 2	0	0	51	46	29	30	156	24	1.00	16	11	14	13	54	15	1.00	23	21	15	19	78	20	1.00
57505	NP_065796.1		AARS2	alanyl-tRNA synthetase 2, mitochondrial	11	8	51	47	29	28	155	52	1.00	47	19	26	24	116	51		54	40	26	27	147	51	0.97
23191	NP_055423.1		CYFIP1	cytoplasmic FMR1 interacting protein 1	1	0	51	52	26	25	154	58	1.00	47	29	36	42	154	55	1.00	29	38	43	29	139	55	1.00
81611	NP_112182.1		ANP32E	acidic nuclear phosphoprotein 32 family member E	8	8	48	57	23	25	153	18	0.99	60	36	29	36	161	16	1.00	82	83	18	28	211	17	0.76
1362	NP_001295.2		CPD	carboxypeptidase D	5	4	56	59	18	20	153	62	1.00	20	9	2	4	35	16		24	18	16	12	70	36	0.92
5832	NP_002851.2		ALDH18A1	aldehyde dehydrogenase 18 family member A1	8	5	54	60	19	19	152	50	0.98	56	37	23	18	134	39	0.97	58	61	20	22	161	45	1.00
9512	NP_004270.2		PMPCB	peptidase, mitochondrial processing beta subunit	3	2	45	45	32	30	152	34	1.00	35	31	31	31	128	36	1.00	49	55	22	27	153	37	1.00
23277	NP_056044.3		KIAA0664	clustered mitochondria homolog	0	0	48	43	28	33	152	50	1.00	32	23	31	29	115	52	1.00	43	30	34	35	142	52	1.00
2052	NP_001129490.1		EPHX1	epoxide hydrolase 1	9	8	50	47	26	28	151	34	1.00	31	20	19	14	84	30		38	36	22	26	122	32	0.91
1495	NP_001894.2		CTNNA1	catenin alpha 1	10	6	53	49	20	28	150	59	0.85	22	10	12	8	52	25		36	29	13	11	89	36
998	NP_001782.1		CDC42	cell division cycle 42	1	0	60	42	22	25	149	8	1.00	32	19	13	16	80	8	1.00	39	34	14	14	101	6	1.00
23760	NP_036531.1		PITPNB	phosphatidylinositol transfer protein beta	10	5	46	37	28	36	147	29	1.00	28	18	24	22	92	29		29	29	16	23	97	30
23256	NP_057190.2		SCFD1	sec1 family domain containing 1	5	2	50	39	30	25	144	37	1.00	49	31	28	32	140	41	1.00	31	36	25	23	115	30	1.00
8540	NP_003650.1		AGPS	alkylglycerone phosphate synthase	2	0	48	38	23	33	142	35	1.00	54	28	27	31	140	36	1.00	35	53	30	27	145	37	1.00
55746	NP_060700.2		NUP133	nucleoporin 133	12	12	45	44	27	25	141	46		56	32	36	33	157	50	0.96	59	64	30	35	188	57	0.84
22908	NP_054735.3		SACM1L	SAC1 like phosphatidylinositide phosphatase	7	7	47	45	23	27	142	39	1.00	26	20	19	23	88	32	0.94	29	21	26	23	99	33	1.00
673	NP_004324.2		BRAF	B-Raf proto-oncogene, serine/threonine kinase	2	0	43	39	29	30	141	42	1.00	54	28	38	42	162	40	1.00	46	49	32	30	157	40	1.00
5636	NP_001230871.1		PRPSAP2	phosphoribosyl pyrophosphate synthetase associated protein 2	10	9	37	42	34	28	141	32	1.00	43	26	22	27	118	33		38	46	24	28	136	32	0.86
51449	NP_057381.3		PCYOX1	prenylcysteine oxidase 1	5	4	41	42	25	32	140	36	1.00	15	5	7	5	32	18		32	31	15	21	99	28	1.00
5862	NP_001229573.1		RAB2A	RAB2A, member RAS oncogene family	8	7	42	48	21	26	137	32	0.98	21	17	16	16	70	31		29	35	13	16	93	25
10550	NP_006398.1		ARL6IP5	ADP ribosylation factor like GTPase 6 interacting protein 5	0	0	42	47	23	22	134	10	1.00	20	12	9	11	52	10	1.00	29	24	10	14	77	10	1.00
5424	NP_002682.2		POLD1	DNA polymerase delta 1, catalytic subunit	11	11	43	37	26	26	132	51		50	34	24	21	129	52		63	62	37	39	201	56	1.00
8895	NP_003900.1		CPNE3	copine 3	11	11	34	30	35	34	133	31	0.98	44	33	33	35	145	32	1.00	42	43	30	36	151	33	0.98
7266	NP_001138238.1		DNAJC7	DnaJ heat shock protein family (Hsp40) member C7	6	5	34	44	26	29	133	32	1.00	31	21	21	23	96	30	1.00	44	39	18	24	125	30	1.00
126133	NP_699160.2		ALDH16A1	aldehyde dehydrogenase 16 family member A1	2	1	39	42	28	23	132	28	1.00	40	20	24	23	107	28	1.00	45	35	25	30	135	28	1.00
10724	NP_036347.1		MGEA5	meningioma expressed antigen 5 (hyaluronidase)	2	1	47	49	16	19	131	32	1.00	49	39	30	25	143	42	1.00	45	50	13	20	128	36	1.00
523	NP_001681.2		ATP6V1A	ATPase H+ transporting V1 subunit A	2	2	52	48	12	18	130	32	1.00	30	16	17	11	74	27	1.00	52	42	21	19	134	34	1.00
4686	NP_002477.1		NCBP1	nuclear cap binding protein subunit 1	6	4	39	57	16	17	129	37	0.99	32	20	20	12	84	29	0.83	38	32	11	17	98	25	0.78
57488	NP_065779.1		ESYT2	extended synaptotagmin 2	8	5	47	37	18	27	129	44	0.97	21	18	14	13	66	32		14	16	6	8	44	25
8904	NP_003906.2		CPNE1	copine 1	4	3	37	46	24	21	128	32	1.00	45	25	22	24	116	32	1.00	46	39	20	20	125	32	1.00
23244	NP_001093869.1		PDS5A	PDS5 cohesin associated factor A	5	4	41	39	18	27	125	45	1.00	48	19	24	20	111	44	1.00	47	44	27	24	142	46	1.00
9367	NP_001182257.1		RAB9A	RAB9A, member RAS oncogene family	7	7	41	45	18	20	124	24	0.88	20	13	16	10	59	15		26	27	12	12	77	18
2108	NP_001121188.1		ETFA	electron transfer flavoprotein alpha subunit	0	0	48	49	8	19	124	28	1.00	27	16	15	9	67	19	1.00	24	23	15	14	76	21	1.00
94081	NP_073591.2		SFXN1	sideroflexin 1	7	4	53	40	13	17	123	28	0.80	24	12	10	13	59	22		25	24	9	9	67	22
6499	NP_008860.4		SKIV2L	Ski2 like RNA helicase	4	3	31	33	25	31	120	52	1.00	51	28	31	22	132	57	1.00	43	36	33	26	138	54	1.00
4048	NP_001243572.1		LTA4H	leukotriene A4 hydrolase	0	0	46	45	13	16	120	43	1.00	31	28	27	27	113	48	1.00	48	41	16	19	124	43	1.00
987	NP_001186211.2		LRBA	LPS responsive beige-like anchor protein	0	0	35	32	25	28	120	58	1.00	24	17	22	27	90	52	1.00	23	26	20	23	92	48	1.00
27440	NP_149061.1		CECR5	haloacid dehalogenase like hydrolase domain containing 5	2	2	39	43	20	17	119	24	1.00	38	25	18	20	101	21	1.00	32	36	22	21	111	20	1.00
55127	NP_060542.4		HEATR1	HEAT repeat containing 1	4	3	38	43	19	18	118	43	1.00	40	15	11	14	80	26	0.98	30	48	15	19	112	37	1.00
3728	NP_068831.1		JUP	junction plakoglobin	1	1	39	39	18	22	118	38	1.00	34	16	14	10	74	27	1.00	26	22	17	17	82	30	1.00
5297	NP_477352.3		PI4KA	phosphatidylinositol 4-kinase alpha	10	2	38	39	21	19	117	40	0.86	31	22	23	19	95	38	0.85	40	29	24	26	119	41	0.97
10273	NP_005852.2		STUB1	STIP1 homology and U-box containing protein 1	3	3	38	31	22	24	115	25	1.00	48	31	30	30	139	32	1.00	47	49	29	30	155	33	1.00
7372	NP_000364.1		UMPS	uridine monophosphate synthetase	6	6	43	33	15	24	115	33	0.86	41	24	25	24	114	35	1.00	49	48	23	19	139	37	1.00
2177	NP_149075.2		FANCD2	Fanconi anemia complementation group D2	3	0	30	33	25	27	115	37	1.00	13	11	9	13	46	28	0.98	28	28	20	20	96	35	1.00
7917	NP_004630.3		BAG6	BCL2 associated athanogene 6	5	4	38	40	18	19	115	33	1.00	8	5	9	8	30	16		19	14	17	13	63	25	0.96
3419	NP_005521.1		IDH3A	isocitrate dehydrogenase 3 (NAD(+)) alpha	7	6	33	33	26	22	114	32	1.00	41	25	28	26	120	33	1.00	42	37	28	31	138	31	1.00
8615	NP_003706.1		USO1	USO1 vesicle transport factor	4	2	40	46	13	14	113	41	1.00	37	30	26	16	109	41	1.00	71	58	17	17	163	56	1.00
91289	NP_149977.2		LMF2	lipase maturation factor 2	1	0	35	33	21	24	113	21	1.00	15	8	10	9	42	13	1.00	23	15	10	8	56	13	1.00
26046	NP_056380.2		LTN1	listerin E3 ubiquitin protein ligase 1	8	5	40	35	21	16	112	38	0.84	28	15	15	25	83	40		55	39	15	22	131	53	0.78
1785	NP_001177645.1		DNM2	dynamin 2	0	0	35	28	23	26	112	49	1.00	26	18	24	21	89	37	1.00	38	41	24	27	130	45	1.00
9183	NP_004715.1		ZW10	zw10 kinetochore protein	3	3	41	35	19	17	112	40	1.00	12	9	11	13	45	26	0.96	22	20	10	16	68	32	0.99
55611	NP_060140.2		OTUB1	OTU deubiquitinase, ubiquitin aldehyde binding 1	1	1	36	37	18	20	111	26	1.00	45	24	26	26	121	28	1.00	48	34	20	24	126	28	1.00
8453	NP_003582.2		CUL2	cullin 2	3	3	37	29	21	23	110	40	1.00	16	12	15	14	57	27	1.00	29	26	15	14	84	32	1.00
3418	NP_002159.2		IDH2	isocitrate dehydrogenase (NADP(+)) 2, mitochondrial	0	0	35	40	15	19	109	32	1.00	48	36	27	27	138	42	1.00	37	46	25	20	128	38	1.00
85476	NP_079272.4		GFM1	G elongation factor mitochondrial 1	12	9	37	36	15	19	107	35		46	23	25	27	121	39		39	47	31	27	144	41	0.90
23279	NP_056046.1		NUP160	nucleoporin 160	3	2	29	34	27	18	108	45	1.00	42	26	23	26	117	45	1.00	48	52	22	33	155	48	1.00
9735	NP_055523.1		KNTC1	kinetochore associated 1	3	3	31	28	22	27	108	53	1.00	27	24	17	14	82	50	1.00	23	39	23	15	100	51	1.00
8539	NP_006586.1		API5	apoptosis inhibitor 5	0	0	37	25	23	22	107	37	1.00	21	14	15	12	62	23	1.00	29	40	14	17	100	31	1.00
7296	NP_003321.3		TXNRD1	thioredoxin reductase 1	0	0	33	36	21	17	107	29	1.00	36	22	17	19	94	29	1.00	40	34	12	13	99	27	1.00
2193	NP_004452.1		FARSA	phenylalanyl-tRNA synthetase alpha subunit	7	6	32	37	16	21	106	28	0.84	33	31	21	23	108	31	1.00	50	49	22	18	139	35	0.97
3735	NP_001123561.1		KARS	lysyl-tRNA synthetase	6	6	42	34	15	14	105	34		44	20	16	19	99	33	0.93	55	63	26	28	172	45	1.00
1487	NP_001319.1		CTBP1	C-terminal binding protein 1	0	0	42	33	20	11	106	21	1.00	48	20	13	9	90	21	1.00	48	43	23	16	130	21	1.00
80142	NP_079348.1		PTGES2	prostaglandin E synthase 2	1	1	27	31	25	23	106	27	1.00	34	13	11	14	72	22	1.00	29	27	19	18	93	26	1.00
6749	NP_003137.1		SSRP1	structure specific recognition protein 1	5	3	19	29	27	30	105	41	1.00	33	23	18	24	98	40	1.00	29	32	31	27	119	44	1.00
5162	NP_000916.2		PDHB	pyruvate dehydrogenase (lipoamide) beta	0	0	33	38	17	17	105	24	1.00	36	21	20	15	92	24	1.00	37	34	16	11	98	20	1.00
9690	NP_055486.2		UBE3C	ubiquitin protein ligase E3C	2	2	34	32	21	18	105	32	1.00	27	20	17	16	80	31	1.00	28	34	10	19	91	29	1.00
27043	NP_055204.2		PELP1	proline, glutamate and leucine rich protein 1	1	0	27	28	28	21	104	34	1.00	8	7	12	5	32	17	1.00	15	12	16	13	56	21	1.00
25939	NP_056289.2		SAMHD1	SAM and HD domain containing deoxynucleoside triphosphate triphosphohydrolase 1	7	5	35	34	18	13	100	35	0.76	48	29	23	23	123	52	1.00	48	47	21	24	140	51	1.00
5106	NP_004554.2		PCK2	phosphoenolpyruvate carboxykinase 2, mitochondrial	9	6	26	30	19	25	100	34	0.87	35	17	22	24	98	32	0.76	25	35	17	19	96	30
55157	NP_060592.2		DARS2	aspartyl-tRNA synthetase 2, mitochondrial	2	0	30	38	15	17	100	34	1.00	34	22	19	17	92	34	1.00	32	22	20	16	90	32	1.00
6738	NP_001035828.1		TROVE2	TROVE domain family member 2	6	5	37	39	11	12	99	30		33	19	20	19	91	30	1.00	35	30	14	23	102	31	0.88
9218	NP_003565.4		VAPA	VAMP associated protein A	10	0	35	30	18	17	100	14	0.89	7	8	13	8	36	9		17	32	17	11	77	13
10953	NP_006800.2		TOMM34	translocase of outer mitochondrial membrane 34	4	3	23	30	19	27	99	26	1.00	30	20	23	22	95	21	1.00	35	41	19	29	124	27	1.00
8907	NP_115882.1		AP1M1	adaptor related protein complex 1 mu 1 subunit	8	8	28	30	22	18	98	37		28	17	25	20	90	37		48	33	23	28	132	45	0.99
27044	NP_055205.2		SND1	staphylococcal nuclease and tudor domain containing 1	0	0	34	29	14	22	99	44	1.00	34	22	27	22	105	48	1.00	34	34	17	16	101	47	1.00
11146	NP_444504.1		GLMN	glomulin, FKBP associated protein	0	0	29	28	20	22	99	37	1.00	13	12	8	12	45	23	1.00	22	12	9	9	52	22	1.00
1445	NP_001120662.1		CSK	C-terminal Src kinase	1	0	34	28	21	15	98	27	1.00	37	23	20	25	105	33	1.00	27	24	13	9	73	30	1.00
3008	NP_005312.1		HIST1H1E	histone cluster 1 H1 family member e	0	0	33	32	17	16	98	21	1.00	22	16	15	16	69	21	1.00	1	30	9	8	48	10	0.75
5558	NP_000938.2		PRIM2	primase (DNA) subunit 2	3	1	23	25	23	26	97	25	1.00	36	21	20	28	105	29	1.00	34	41	18	26	119	28	1.00
10735	NP_001036214.1		STAG2	stromal antigen 2	0	0	29	34	19	15	97	32	1.00	20	9	14	11	54	18	1.00	20	23	14	15	72	25	1.00
2778	NP_536350.2		GNAS	GNAS complex locus	5	4	36	24	17	19	96	31	1.00	27	13	17	16	73	29	0.97	21	16	16	16	69	27	1.00
2820	NP_001076581.2		GPD2	glycerol-3-phosphate dehydrogenase 2	4	3	27	28	17	24	96	37	1.00	28	13	6	14	61	28	0.75	18	13	9	10	50	24	0.84
10531	NP_001229236.1		PITRM1	pitrilysin metallopeptidase 1	0	0	27	28	21	19	95	28	1.00	26	14	18	16	74	27	1.00	29	12	17	20	78	31	1.00
162	NP_663782.2		AP1B1	adaptor related protein complex 1 beta 1 subunit	9	1	33	21	20	20	94	36	0.95	20	18	13	0	51	28		45	55	24	14	138	47	0.91
2969	NP_127492.1		GTF2I	general transcription factor IIi	7	6	30	34	11	18	93	35		30	22	23	22	97	43	1.00	32	44	23	20	119	48	1.00
7386	NP_005994.2		UQCRFS1	ubiquinol-cytochrome c reductase, Rieske iron-sulfur polypeptide 1	2	2	38	34	10	12	94	14	1.00	14	12	11	16	53	12	1.00	28	20	7	10	65	11	0.98
56926	NP_064555.2		NCLN	nicalin	7	6	29	31	14	19	93	32		26	13	11	15	65	27		29	28	20	17	94	33	0.91
617	NP_001073335.1		BCS1L	BCS1 homolog, ubiquinol-cytochrome c reductase complex chaperone	1	1	33	28	16	17	94	21	1.00	12	7	9	8	36	10	1.00	11	18	10	12	51	13	1.00
6905	NP_001072983.1		TBCE	tubulin folding cofactor E	0	0	31	27	19	16	93	23	1.00	38	20	13	14	85	22	1.00	33	41	17	15	106	30	1.00
6652	NP_003095.2		SORD	sorbitol dehydrogenase	2	1	31	31	13	18	93	18	1.00	33	19	21	20	93	19	1.00	27	32	14	19	92	19	1.00
3163	NP_001120676.1		HMOX2	heme oxygenase 2	4	3	30	36	13	14	93	24	1.00	18	8	8	9	43	19		31	21	11	12	75	23	0.98
6624	NP_003079.1		FSCN1	fascin actin-bundling protein 1	0	0	28	34	15	16	93	27	1.00	38	21	23	24	106	27	1.00	17	16	17	18	68	25	1.00
9439	NP_057063.2		MED23	mediator complex subunit 23	0	0	29	24	16	24	93	41	1.00	24	16	10	15	65	31	1.00	14	8	14	10	46	23	1.00
10102	NP_005717.3		TSFM	Ts translation elongation factor, mitochondrial	6	3	35	29	14	14	92	22	0.98	26	18	13	11	68	15	0.81	32	32	10	13	87	19	0.76
51071	NP_057038.2		DERA	deoxyribose-phosphate aldolase	2	2	34	26	12	19	91	26	1.00	23	18	11	16	68	23	1.00	28	32	21	18	99	25	1.00
57142	NP_722550.1		RTN4	reticulon 4	4	4	32	31	15	13	91	14	0.99	6	7	4	6	23	11		28	19	8	7	62	11
2224	NP_001129293.1		FDPS	farnesyl diphosphate synthase	5	5	29	26	16	19	90	21	1.00	41	20	17	18	96	21	1.00	58	53	17	19	147	20	1.00
6730	NP_055045.2		SRP68	signal recognition particle 68	6	5	28	29	18	15	90	25	0.95	39	23	17	18	97	36	0.99	47	48	19	30	144	40	1.00
824	NP_001739.2		CAPN2	calpain 2	0	0	37	26	9	18	90	25	1.00	15	10	10	10	45	23	1.00	54	41	11	16	122	31	1.00
64786	NP_001139686.1		TBC1D15	TBC1 domain family member 15	6	6	34	25	15	14	88	28		16	14	13	14	57	24		29	26	15	16	86	28	0.79
55275	NP_001121631.1		VPS53	VPS53, GARP complex subunit	1	0	21	27	23	19	90	27	1.00	36	14	16	15	81	32	1.00	25	17	22	19	83	24	1.00
11316	NP_009194.2		COPE	coatomer protein complex subunit epsilon	7	5	30	33	10	14	87	30		34	23	19	20	96	34	1.00	30	30	18	16	94	28	0.92
8450	NP_003579.3		CUL4B	cullin 4B	0	0	42	28	8	10	88	26	1.00	62	35	22	27	146	33	1.00	62	62	32	19	175	42	1.00
8237	NP_004642.2		USP11	ubiquitin specific peptidase 11	2	2	19	33	19	16	87	27	1.00	35	23	18	23	99	28	1.00	35	38	17	21	111	28	1.00
5863	NP_004752.1		RGL2	ral guanine nucleotide dissociation stimulator like 2	0	0	27	29	13	18	87	28	1.00	53	25	32	31	141	37	1.00	25	33	17	9	84	32	1.00
23332	NP_056097.1		CLASP1	cytoplasmic linker associated protein 1	0	0	34	23	13	17	87	39	1.00	10	10	7	6	33	19	1.00	29	22	8	7	66	27	1.00
5306	NP_006215.1		PITPNA	phosphatidylinositol transfer protein alpha	1	1	32	31	12	12	87	23	1.00	19	8	2	5	34	10	1.00	23	17	8	9	57	14	1.00
4047	NP_002331.3		LSS	lanosterol synthase	0	0	30	30	13	14	87	35	1.00	12	12	5	3	32	17	1.00	10	12	16	11	49	25	1.00
8189	NP_004810.2		SYMPK	symplekin	0	0	24	33	15	15	87	36	1.00	0	2	4	4	10	7		19	12	7	9	47	23	1.00
3939	NP_001128711.1		LDHA	lactate dehydrogenase A	3	2	28	38	13	7	86	21	0.93	45	28	15	13	101	22	1.00	49	41	8	11	109	23	0.97
4012	NP_787116.2		LNPEP	leucyl and cystinyl aminopeptidase	1	1	22	36	12	16	86	34	1.00	18	3	6	6	33	12	1.00	20	21	7	13	61	24	1.00
91942	NP_777549.1		NDUFAF2	NADH:ubiquinone oxidoreductase complex assembly factor 2	0	0	22	25	20	19	86	26	1.00	5	8	7	8	28	13	1.00	18	21	7	8	54	17	1.00
3998	NP_005561.1		LMAN1	lectin, mannose binding 1	4	3	29	28	15	14	86	29	1.00	7	4	2	0	13	8		11	10	5	7	33	18
60626	NP_068751.4		RIC8A	RIC8 guanine nucleotide exchange factor A	8	5	23	24	20	18	85	27	0.96	34	19	18	14	85	24		45	33	12	21	111	35	0.75
10056	NP_005678.3		FARSB	phenylalanyl-tRNA synthetase beta subunit	0	0	26	30	13	16	85	28	1.00	37	28	13	16	94	34	1.00	30	32	19	22	103	34	1.00
9948	NP_059830.1		WDR1	WD repeat domain 1	0	0	26	29	15	15	85	28	1.00	42	20	15	15	92	29	1.00	38	38	14	10	100	27	1.00
5478	NP_066953.1		PPIA	peptidylprolyl isomerase A	8	7	21	24	21	19	85	16	0.83	25	17	16	17	75	12		23	17	17	15	72	16
8443	NP_055051.1		GNPAT	glyceronephosphate O-acyltransferase	2	1	24	29	13	19	85	28	1.00	26	11	14	16	67	22	1.00	26	20	7	12	65	26	0.99
23640	NP_036399.3		HSPBP1	HSPA (Hsp70) binding protein 1	0	0	18	24	21	21	84	21	1.00	10	8	8	9	35	17	1.00	16	24	20	10	70	19	1.00
55361	NP_060895.1		PI4K2A	phosphatidylinositol 4-kinase type 2 alpha	1	0	28	30	13	13	84	26	1.00	8	1	3	3	15	8		10	2	4	2	18	8	0.99
5160	NP_001166925.1		PDHA1	pyruvate dehydrogenase alpha 1	1	0	24	21	17	21	83	24	1.00	28	19	23	18	88	24	1.00	26	35	22	21	104	28	1.00
9958	NP_006304.1		USP15	ubiquitin specific peptidase 15	4	4	26	26	18	13	83	30	0.99	31	20	18	22	91	34	1.00	32	37	15	12	96	36	0.98
5481	NP_005029.1		PPID	peptidylprolyl isomerase D	0	0	27	29	12	15	83	19	1.00	15	9	12	10	46	16	1.00	21	16	8	11	56	17	1.00
9989	NP_001035847.1		PPP4R1	protein phosphatase 4 regulatory subunit 1	0	0	33	29	11	9	82	26	1.00	19	16	6	2	43	15	1.00	50	39	8	14	111	27	1.00
823	NP_005177.2		CAPN1	calpain 1	6	6	22	26	17	17	82	36	0.95	30	19	23	19	91	42	1.00	34	32	16	15	97	34	0.79
1729	NP_005210.3		DIAPH1	diaphanous related formin 1	3	3	33	18	13	18	82	38	1.00	26	13	19	15	73	31	1.00	32	27	20	14	93	35	1.00
23154	NP_055099.1		NCDN	neurochondrin	2	1	26	22	16	18	82	25	1.00	15	13	15	14	57	19	1.00	28	26	22	12	88	22	1.00
5965	NP_116559.1		RECQL	RecQ like helicase	4	4	22	21	23	15	81	35	1.00	38	19	21	20	98	41	1.00	38	36	27	22	123	41	1.00
221927	NP_689956.2		BRAT1	BRCA1 associated ATM activator 1	1	1	29	23	15	14	81	23	1.00	15	10	9	9	43	20	1.00	25	16	11	11	63	21	1.00
1478	NP_001316.1		CSTF2	cleavage stimulation factor subunit 2	0	0	29	29	12	11	81	28	1.00	7	9	3	3	22	11	1.00	12	15	6	8	41	14	1.00
2935	NP_002085.2		GSPT1	G1 to S phase transition 1	3	0	24	28	17	11	80	30	0.99	31	21	18	13	83	32	1.00	27	24	18	20	89	39	1.00
160	NP_055018.2		AP2A1	adaptor related protein complex 2 alpha 1 subunit	7	5	30	31	7	11	79	34		20	17	11	18	66	24		27	31	19	16	93	36	0.93
3422	NP_004499.2		IDI1	isopentenyl-diphosphate delta isomerase 1	0	0	32	27	12	9	80	18	1.00	17	13	10	11	51	16	1.00	10	15	7	12	44	17	1.00
8417	NP_003560.2		STX7	syntaxin 7	3	2	30	26	11	13	80	20	1.00	9	5	4	5	23	10		13	3	3	4	23	11
56474	NP_001137474.1		CTPS2	CTP synthase 2	1	0	19	20	14	25	78	23	1.00	25	16	24	21	86	27	1.00	21	30	34	29	114	26	1.00
55671	NP_115949.3		SMEK1	protein phosphatase 4 regulatory subunit 3A	0	0	21	39	12	6	78	16	1.00	29	12	11	13	65	15	1.00	37	25	11	11	84	18	1.00
9380	NP_036335.1		GRHPR	glyoxylate and hydroxypyruvate reductase	2	2	25	24	12	17	78	21	1.00	22	13	16	11	62	22	1.00	21	24	2	14	61	17	0.75
23265	NP_001138769.1		EXOC7	exocyst complex component 7	0	0	29	20	13	16	78	36	1.00	7	9	7	7	30	19	1.00	6	21	10	10	47	26	1.00
5792	NP_569707.2		PTPRF	protein tyrosine phosphatase, receptor type F	2	0	23	22	16	17	78	31	1.00	13	6	6	5	30	11	0.95	6	4	2	4	16	9	0.75
7358	NP_003350.1		UGDH	UDP-glucose 6-dehydrogenase	0	0	23	27	11	16	77	36	1.00	30	13	13	12	68	35	1.00	24	33	11	8	76	36	1.00
56889	NP_064508.3		TM9SF3	transmembrane 9 superfamily member 3	3	3	24	18	18	17	77	14	1.00	17	8	11	12	48	14	0.90	23	22	5	4	54	12
5721	NP_002809.2		PSME2	proteasome activator subunit 2	0	0	26	23	14	14	77	18	1.00	7	5	7	8	27	9	1.00	11	15	7	9	42	14	1.00
4976	NP_570849.2		OPA1	OPA1, mitochondrial dynamin like GTPase	0	0	29	20	12	15	76	28	1.00	20	17	14	13	64	31	1.00	33	46	18	19	116	43	1.00
16	NP_001596.2		AARS	alanyl-tRNA synthetase	0	0	23	30	9	14	76	32	1.00	20	11	17	19	67	32	1.00	20	9	19	18	66	30	1.00
29880	NP_001135836.1		ALG5	ALG5, dolichyl-phosphate beta-glucosyltransferase	0	0	22	21	18	15	76	17	1.00	19	10	13	10	52	15	1.00	11	18	7	13	49	9	1.00
55207	NP_060654.1		ARL8B	ADP ribosylation factor like GTPase 8B	2	2	17	32	11	16	76	18	1.00	19	14	9	12	54	20	1.00	9	18	11	10	48	16	1.00
9675	NP_055472.1		TTI1	TELO2 interacting protein 1	0	0	28	29	9	10	76	24	1.00	15	1	0	4	20	8		11	18	3	4	36	12	1.00
5738	NP_065173.2		PTGFRN	prostaglandin F2 receptor inhibitor	0	0	19	23	20	14	76	37	1.00	0	2	1	1	4	3		4	8	2	2	16	7	0.99
57614	NP_065905.2		KIAA1468	KIAA1468	0	0	22	29	12	12	75	27	1.00	14	10	8	9	41	12	1.00	21	25	10	10	66	20	1.00
8508	NP_003625.2		NIPSNAP1	nipsnap homolog 1	3	3	16	24	18	17	75	23	1.00	21	8	10	12	51	21	0.89	12	23	12	11	58	20	0.99
9747	NP_001193867.1		FAM115A	TRPM8 channel associated factor 1	0	0	22	25	15	13	75	29	1.00	16	12	15	10	53	26	1.00	15	0	15	13	43	19	0.75
23098	NP_055892.2		SARM1	sterile alpha and TIR motif containing 1	1	0	18	20	17	19	74	28	1.00	25	12	13	12	62	25	1.00	47	36	19	23	125	42	1.00
25796	NP_036220.1		PGLS	6-phosphogluconolactonase	0	0	20	24	16	14	74	28	1.00	27	17	16	14	74	27	1.00	32	30	15	12	89	27	1.00
4580	NP_002446.2		MTX1	metaxin 1	2	2	28	28	6	12	74	20	0.94	29	15	11	12	67	21	1.00	32	23	8	15	78	19	0.99
439	NP_004308.2		ASNA1	arsA arsenite transporter, ATP-binding, homolog 1 (bacterial)	0	0	29	25	8	12	74	14	1.00	7	7	5	6	25	11	1.00	23	20	9	11	63	15	1.00
6558	NP_001243390.1		SLC12A2	solute carrier family 12 member 2	0	0	14	33	13	14	74	32	1.00	8	3	4	4	19	10	1.00	6	4	4	4	18	9	1.00
4678	NP_002473.2		NASP	nuclear autoantigenic sperm protein	0	0	30	21	11	11	73	13	1.00	22	14	10	12	58	15	1.00	28	31	2	9	70	19	1.00
10226	NP_005808.3		PLIN3	perilipin 3	0	0	31	26	5	11	73	24	1.00	5	0	1	1	7	4		4	12	3	4	23	13	1.00
1783	NP_006132.1		DYNC1LI2	dynein cytoplasmic 1 light intermediate chain 2	3	3	20	29	12	11	72	24	0.99	23	11	13	13	60	26	1.00	36	34	12	11	93	30	0.99
9318	NP_001137359.1		COPS2	COP9 signalosome subunit 2	2	2	22	24	13	13	72	29	1.00	21	11	11	14	57	20	1.00	22	15	15	16	68	22	1.00
2235	NP_000131.2		FECH	ferrochelatase	5	4	26	23	8	14	71	20		26	10	8	10	54	15		22	18	13	12	65	16	0.89
10965	NP_006812.3		ACOT2	acyl-CoA thioesterase 2	2	0	27	27	6	12	72	27	0.99	28	5	8	9	50	16	0.97	16	20	8	9	53	22	0.99
26128	NP_056449.1		KIAA1279	KIF1 binding protein	0	0	28	30	7	6	71	28	1.00	27	15	11	15	68	24	1.00	28	22	8	13	71	24	1.00
22868	NP_001129665.1		FASTKD2	FAST kinase domains 2	3	2	22	25	11	13	71	20	1.00	16	6	5	14	41	18		21	20	5	6	52	19
161	NP_036437.1		AP2A2	adaptor related protein complex 2 alpha 2 subunit	5	1	37	26	7	0	70	25		26	15	6	11	58	21	0.83	25	32	14	14	85	34	0.98
83440	NP_112574.3		ADPGK	ADP dependent glucokinase	3	2	33	19	9	10	71	17	0.99	12	8	5	5	30	14		25	13	6	7	51	16	0.78
51497	NP_945327.2		TH1L	negative elongation factor complex member C/D	0	0	21	20	14	16	71	25	1.00	8	7	9	6	30	15	1.00	18	13	10	8	49	18	1.00
84293	NP_115709.3		FAM213A	family with sequence similarity 213 member A	0	0	20	23	13	14	70	15	1.00	11	6	7	6	30	11	1.00	15	16	7	9	47	11	1.00
9044	NP_003963.1		BTAF1	B-TFIID TATA-box binding protein associated factor 1	2	2	15	21	20	13	69	32	1.00	22	22	18	15	77	40	1.00	37	34	17	20	108	40	1.00
84301	NP_115717.3		DDI2	DNA damage inducible 1 homolog 2	0	0	12	21	19	17	69	22	1.00	12	11	10	7	40	16	1.00	22	19	7	8	56	20	1.00
3064	NP_002102.4		HTT	huntingtin	0	0	21	17	19	11	68	43	1.00	19	12	10	7	48	29	1.00	31	31	10	16	88	46	1.00
8065	NP_003469.2		CUL5	cullin 5	2	2	17	15	16	20	68	41	1.00	20	17	17	20	74	39	1.00	24	26	13	18	81	42	1.00
78991	NP_076933.3		PCYOX1L	prenylcysteine oxidase 1 like	2	2	17	15	17	19	68	20	1.00	11	9	10	7	37	12	0.98	11	14	8	4	37	12	0.79
9862	NP_001072986.1		MED24	mediator complex subunit 24	0	0	24	24	7	13	68	29	1.00	10	7	2	6	25	10	1.00	6	7	3	1	17	9
28985	NP_001131026.1		MCTS1	MCTS1, re-initiation and release factor	0	0	29	16	13	9	67	16	1.00	36	21	14	12	83	17	1.00	12	11	5	13	41	15	1.00
501	NP_001188306.1		ALDH7A1	aldehyde dehydrogenase 7 family member A1	0	0	21	19	16	11	67	25	1.00	12	15	10	5	42	20	1.00	17	10	5	4	36	17	1.00
84817	NP_116120.1		TXNDC17	thioredoxin domain containing 17	7	6	14	19	16	17	66	14		20	13	21	24	78	14		27	23	22	19	91	14	0.99
56681	NP_001136120.1		SAR1A	secretion associated Ras related GTPase 1A	2	2	26	16	11	14	67	15	1.00	22	9	6	5	42	12	0.81	9	12	5	8	34	9	0.86
57187	NP_001075019.1		THOC2	THO complex 2	4	3	24	18	11	13	66	22	0.98	25	18	15	13	71	27	1.00	35	28	14	16	93	32	1.00
64083	NP_071413.1		GOLPH3	golgi phosphoprotein 3	4	2	29	18	10	9	66	11	0.95	37	19	10	10	76	9	0.98	28	31	9	8	76	11	0.87
57521	NP_065812.1		RPTOR	regulatory associated protein of MTOR complex 1	4	4	18	18	15	15	66	20	1.00	25	15	9	12	61	25	0.78	23	21	16	15	75	31	1.00
8803	NP_003841.1		SUCLA2	succinate-CoA ligase ADP-forming beta subunit	0	0	17	20	15	14	66	25	1.00	23	15	13	17	68	25	1.00	26	23	12	10	71	25	1.00
223	NP_000687.3		ALDH9A1	aldehyde dehydrogenase 9 family member A1	0	0	19	19	11	17	66	24	1.00	21	15	18	15	69	24	1.00	16	23	14	16	69	23	1.00
4641	NP_001074248.1		MYO1C	myosin IC	3	2	15	25	13	13	66	29	1.00	10	3	7	12	32	16		22	20	11	9	62	26	0.99
2180	NP_001986.2		ACSL1	acyl-CoA synthetase long chain family member 1	2	2	21	21	13	11	66	34	1.00	10	9	13	13	45	23	1.00	11	15	13	12	51	30	1.00
1376	NP_000089.1		CPT2	carnitine palmitoyltransferase 2	0	0	22	17	14	13	66	23	1.00	16	7	10	8	41	19	1.00	17	13	5	12	47	18	1.00
23066	NP_036430.1		CAND2	cullin associated and neddylation dissociated 2 (putative)	2	1	22	20	11	12	65	25	1.00	20	8	14	11	53	27	1.00	42	50	23	23	138	35	1.00
164	NP_001119.3		AP1G1	adaptor related protein complex 1 gamma 1 subunit	2	0	15	16	17	17	65	32	1.00	16	12	18	15	61	30	1.00	22	17	21	22	82	34	1.00
10094	NP_005710.1		ARPC3	actin related protein 2/3 complex subunit 3	0	0	23	17	12	13	65	10	1.00	24	12	13	13	62	12	1.00	20	18	12	9	59	10	1.00
5496	NP_817092.1		PPM1G	protein phosphatase, Mg2+/Mn2+ dependent 1G	0	0	27	27	4	6	64	16	1.00	26	11	8	9	54	13	1.00	31	33	11	11	86	22	1.00
7337	AAH09271.1		UBE3A	ubiquitin protein ligase E3A	0	0	23	21	10	10	64	29	1.00	25	11	13	11	60	29	1.00	22	25	15	8	70	33	1.00
5019	NP_000427.1		OXCT1	3-oxoacid CoA-transferase 1	0	0	23	15	12	14	64	20	1.00	27	13	17	15	72	24	1.00	17	19	13	9	58	20	1.00
55610	NP_060137.2		CCDC132	VPS50, EARP/GARPII complex subunit	1	0	24	18	12	10	64	34	1.00	10	9	6	6	31	22	1.00	15	18	9	11	53	28	1.00
83743	NP_113673.3		GRWD1	glutamate rich WD repeat containing 1	6	5	20	16	12	14	62	14		21	13	8	14	56	16		39	44	18	15	116	20	0.95
537	NP_001174.2		ATP6AP1	ATPase H+ transporting accessory protein 1	3	3	17	24	13	10	64	17	0.99	13	10	6	8	37	18		13	14	4	10	41	14
5236	NP_002624.2		PGM1	phosphoglucomutase 1	0	0	22	17	12	12	63	24	1.00	23	15	9	11	58	22	1.00	24	16	9	8	57	24	1.00
1488	NP_073713.2		CTBP2	C-terminal binding protein 2	1	1	27	17	9	9	62	23	1.00	34	22	20	19	95	28	1.00	30	38	10	17	95	26	1.00
10787	NP_995314.1		NCKAP1	NCK associated protein 1	0	0	20	25	6	11	62	27	1.00	17	11	11	10	49	20	1.00	16	16	13	13	58	26	1.00
23170	NP_055955.1		TTLL12	tubulin tyrosine ligase like 12	0	0	24	14	11	13	62	29	1.00	19	13	9	9	50	25	1.00	17	17	12	7	53	26	1.00
51024	NP_057152.2		FIS1	fission, mitochondrial 1	1	0	19	13	13	17	62	9	1.00	6	6	6	7	25	9	1.00	6	5	3	4	18	8	1.00
80308	NP_001171820.1		FLAD1	flavin adenine dinucleotide synthetase 1	0	0	17	25	10	9	61	18	1.00	15	12	8	7	42	19	1.00	25	29	9	11	74	20	1.00
26578	NP_036515.4		OSTF1	osteoclast stimulating factor 1	0	0	11	18	16	16	61	10	1.00	14	11	17	13	55	8	1.00	17	18	17	18	70	8	1.00
2947	NP_000840.2		GSTM3	glutathione S-transferase mu 3	0	0	21	17	9	14	61	22	1.00	26	13	15	15	69	24	1.00	19	13	9	11	52	21	1.00
23193	NP_938148.1		GANAB	glucosidase II alpha subunit	3	2	20	20	10	11	61	26	1.00	19	11	8	8	46	27	0.94	17	17	4	7	45	21
55697	NP_060522.3		VAC14	Vac14, PIKFYVE complex component	0	0	25	22	8	6	61	15	1.00	12	8	0	0	20	4		17	17	0	0	34	7
1020	NP_001157882.1		CDK5	cyclin dependent kinase 5	4	4	22	18	7	13	60	17		24	15	8	14	61	19	0.76	34	26	13	12	85	20	0.97
51635	NP_057113.1		DHRS7	dehydrogenase/reductase 7	0	0	21	23	8	9	61	18	1.00	9	0	2	0	11	6		3	5	1	2	11	9
4430	NP_001123630.1		MYO1B	myosin IB	4	2	17	12	17	14	60	27	1.00	20	17	19	24	80	39	1.00	35	40	25	18	118	41	1.00
8775	NP_003818.2		NAPA	NSF attachment protein alpha	0	0	20	20	8	12	60	23	1.00	16	8	5	6	35	16	1.00	30	20	13	11	74	25	1.00
5585	NP_002732.3		PKN1	protein kinase N1	0	0	16	17	12	14	59	22	1.00	16	9	13	12	50	21	1.00	25	17	14	12	68	23	1.00
1192	NP_001279.2		CLIC1	chloride intracellular channel 1	3	2	17	23	10	9	59	14	0.99	18	12	10	11	51	14	1.00	26	16	9	10	61	16	0.99
373156	NP_001137153.1		GSTK1	glutathione S-transferase kappa 1	2	0	19	25	7	8	59	19	0.99	22	12	8	6	48	16	0.98	18	15	11	10	54	16	1.00
11034	NP_006861.1		DSTN	destrin, actin depolymerizing factor	3	3	19	14	14	12	59	10	1.00	27	12	10	13	62	12	0.99	16	20	7	8	51	10
60412	NP_068579.3		EXOC4	exocyst complex component 4	1	0	13	15	12	18	58	28	1.00	23	10	20	13	66	25	1.00	35	27	19	10	91	32	1.00
25885	NP_056240.2		POLR1A	RNA polymerase I subunit A	0	0	24	19	8	7	58	26	1.00	19	12	10	8	49	30	1.00	27	24	15	21	87	39	1.00
10484	NP_006355.2		SEC23A	Sec23 homolog A, coat complex II component	4	4	21	16	12	9	58	13	0.78	22	15	11	11	59	11	0.87	25	21	11	14	71	16	0.94
1738	NP_000099.2		DLD	dihydrolipoamide dehydrogenase	2	1	18	22	10	8	58	9	1.00	8	5	5	5	23	11	0.92	18	21	8	7	54	9	0.99
81542	NP_110382.3		TMX1	thioredoxin related transmembrane protein 1	6	3	15	19	13	11	58	21	0.81	15	7	10	10	42	20		9	14	11	11	45	18
169714	NP_859052.3		QSOX2	quiescin sulfhydryl oxidase 2	1	0	10	21	12	15	58	22	1.00	16	10	11	10	47	24	1.00	16	13	5	11	45	17	1.00
5894	NP_002871.1		RAF1	Raf-1 proto-oncogene, serine/threonine kinase	2	2	20	16	13	9	58	19	1.00	25	23	10	10	68	20	1.00	15	13	0	7	35	13
10533	NP_006386.1		ATG7	autophagy related 7	0	0	20	18	10	10	58	20	1.00	18	140	13	11	182	21	1.00	10	9	5	10	34	7	1.00
369	NP_001243125.1		ARAF	A-Raf proto-oncogene, serine/threonine kinase	3	2	13	15	14	15	57	19	1.00	17	12	17	17	63	19	1.00	15	26	8	18	67	21	0.97
55631	NP_060238.3		LRRC40	leucine rich repeat containing 40	1	0	16	14	12	15	57	24	1.00	16	17	18	21	72	34	1.00	19	17	10	11	57	22	1.00
51668	NP_057210.2		HSPB11	heat shock protein family B (small) member 11	3	1	18	15	12	12	57	10	0.99	21	13	16	14	64	12	1.00	14	19	6	10	49	12	0.96
26015	NP_056355.2		RPAP1	RNA polymerase II associated protein 1	2	0	18	20	8	11	57	29	1.00	14	7	5	5	31	19	0.94	14	11	5	5	35	19	0.95
23673	NP_803173.1		STX12	syntaxin 12	2	1	25	16	8	8	57	16	0.99	5	2	0	0	7	4		11	10	7	1	29	9
26130	NP_056450.2		GAPVD1	GTPase activating protein and VPS9 domains 1	0	0	16	26	9	5	56	29	1.00	19	13	12	10	54	35	1.00	35	24	12	10	81	35	1.00
23480	NP_001012474.1		SEC61G	Sec61 translocon gamma subunit	5	3	13	13	14	16	56	8	0.98	7	13	12	16	48	9		13	10	16	19	58	8	0.86
6894	NP_005637.3		TARBP1	TAR (HIV-1) RNA binding protein 1	0	0	22	13	10	11	56	25	1.00	17	10	9	9	45	22	1.00	20	10	9	8	47	26	1.00
84196	NP_115612.4		USP48	ubiquitin specific peptidase 48	0	0	22	15	8	11	56	18	1.00	24	12	11	9	56	18	1.00	18	20	3	5	46	17	1.00
10920	NP_937832.1		COPS8	COP9 signalosome subunit 8	2	2	14	17	11	14	56	17	1.00	9	6	3	4	22	8		12	11	5	7	35	14	0.85
5167	NP_006199.2		ENPP1	ectonucleotide pyrophosphatase/phosphodiesterase 1	0	0	17	24	7	8	56	18	1.00	8	3	4	5	20	8	1.00	9	6	7	8	30	13	1.00
253714	NP_940870.2		MMS22L	MMS22 like, DNA repair protein	0	0	13	14	13	16	56	22	1.00	0	0	3	4	7	5		2	6	6	3	17	11	1.00
8546	NP_003655.3		AP3B1	adaptor related protein complex 3 beta 1 subunit	0	0	24	16	9	6	55	33	1.00	21	14	18	22	75	43	1.00	59	67	51	47	224	76	1.00
56647	NP_510868.1		BCCIP	BRCA2 and CDKN1A interacting protein	5	3	16	18	9	12	55	17	0.78	25	11	12	11	59	18	0.85	31	25	16	16	88	22	1.00
221294	NP_689942.2		NT5DC1	5'-nucleotidase domain containing 1	0	0	20	18	11	6	55	18	1.00	26	24	13	18	81	28	1.00	30	21	12	5	68	24	1.00
28969	NP_001153239.1		BZW2	basic leucine zipper and W2 domains 2	0	0	13	21	9	12	55	19	1.00	8	4	8	6	26	10	1.00	13	16	13	10	52	15	1.00
5527	NP_001155197.1		PPP2R5C	protein phosphatase 2 regulatory subunit B'gamma	0	0	22	20	8	5	55	18	1.00	11	5	7	5	28	12	1.00	23	12	2	9	46	15	1.00
27229	NP_055259.2		TUBGCP4	tubulin gamma complex associated protein 4	2	1	15	23	7	10	55	19	0.99	12	11	6	7	36	13	0.98	16	8	8	10	42	15	0.99
9777	NP_055557.2		TM9SF4	transmembrane 9 superfamily member 4	0	0	18	20	8	9	55	15	1.00	7	6	0	0	13	6		10	8	5	5	28	11	1.00
10493	NP_006364.2		VAT1	vesicle amine transport 1	5	3	17	18	7	12	54	18		10	5	6	6	27	10		17	24	10	12	63	19	0.84
8801	NP_003839.2		SUCLG2	succinate-CoA ligase GDP-forming beta subunit	0	0	14	15	11	15	55	21	1.00	10	6	6	9	31	17	1.00	5	12	6	4	27	16	1.00
2319	NP_004466.2		FLOT2	flotillin 2	2	1	13	15	15	12	55	25	1.00	7	6	2	4	19	10	0.79	7	5	3	1	16	9
29956	NP_071358.1		CERS2	ceramide synthase 2	3	3	15	18	9	12	54	13	0.96	9	9	7	11	36	15	0.75	18	23	12	9	62	14	0.96
7174	NP_003282.2		TPP2	tripeptidyl peptidase 2	0	0	12	20	11	11	54	30	1.00	28	17	13	12	70	40	1.00	14	19	13	12	58	33	1.00
10535	NP_006388.2		RNASEH2A	ribonuclease H2 subunit A	0	0	19	24	6	5	54	11	1.00	21	20	12	11	64	15	1.00	17	11	9	14	51	10	1.00
79877	NP_079095.3		DCAKD	dephospho-CoA kinase domain containing	3	2	12	23	9	10	54	14	0.99	7	8	11	7	33	8	0.82	14	8	7	11	40	12	0.90
100507855	XP_003119578.1		LOC100507855	0	0	0	21	19	6	8	54	19	1.00	13	6	10	8	37	18	1.00	10	11	9	7	37	14	1.00
11313	NP_009191.1		LYPLA2	lysophospholipase II	2	0	19	22	7	6	54	6	0.98	15	8	5	3	31	6	0.89	14	14	3	2	33	7	0.77
7162	NP_001159864.1		TPBG	trophoblast glycoprotein	0	0	18	17	10	9	54	15	1.00	4	2	2	3	11	4	0.99	6	3	1	3	13	5
1499	NP_001091680.1		CTNNB1	catenin beta 1	1	1	24	17	6	7	54	27	1.00	10	4	2	2	18	9	0.99	5	0	0	0	5	3
51020	NP_057147.2		HDDC2	HD domain containing 2	0	0	22	20	6	5	53	13	1.00	24	15	8	10	57	16	1.00	21	25	11	9	66	17	1.00
8570	NP_003676.2		KHSRP	KH-type splicing regulatory protein	4	4	19	13	9	12	53	22	0.77	17	6	11	9	43	17		19	8	11	12	50	21
26263	NP_036302.1		FBXO22	F-box protein 22	2	2	13	16	11	13	53	18	1.00	22	13	12	12	59	20	1.00	12	14	7	3	36	15
5754	NP_002812.2		PTK7	protein tyrosine kinase 7 (inactive)	1	0	19	15	8	11	53	21	1.00	0	0	3	0	3	2		2	6	5	6	19	14	1.00
26528	NP_061832.2		DAZAP1	DAZ associated protein 1	2	2	9	19	12	12	52	11	1.00	18	10	15	14	57	12	1.00	24	21	13	5	63	12	0.87
8914	NP_003911.2		TIMELESS	timeless circadian clock	1	0	13	20	9	10	52	19	1.00	11	10	10	6	37	16	1.00	22	15	8	9	54	20	1.00
6654	NP_005624.2		SOS1	SOS Ras/Rac guanine nucleotide exchange factor 1	0	0	16	18	6	11	51	25	1.00	27	16	12	12	67	33	1.00	21	22	21	13	77	33	1.00
23644	NP_055144.3		EDC4	enhancer of mRNA decapping 4	1	0	14	12	14	11	51	19	1.00	21	13	15	11	60	20	1.00	19	15	11	10	55	14	1.00
55795	NP_060856.2		PCID2	PCI domain containing 2	3	2	15	12	14	10	51	18	1.00	20	15	10	8	53	20	0.97	22	16	2	11	51	20	0.75
22930	NP_001165906.1		RAB3GAP1	RAB3 GTPase activating protein catalytic subunit 1	1	0	17	16	9	9	51	25	1.00	12	9	6	4	31	19	1.00	14	12	8	13	47	23	1.00
11001	NP_003636.2		SLC27A2	solute carrier family 27 member 2	1	1	23	12	7	9	51	23	1.00	1	2	6	3	12	9		14	10	11	6	41	19	1.00
64149	NP_071739.2		C17orf75	chromosome 17 open reading frame 75	4	2	11	16	12	12	51	15	0.99	21	14	11	12	58	18	0.99	16	10	4	9	39	12
29883	NP_473367.2		CNOT7	CCR4-NOT transcription complex subunit 7	3	3	11	20	8	12	51	13	0.90	14	6	7	7	34	11		6	15	8	6	35	11
23214	NP_001257869.1		XPO6	exportin 6	0	0	19	14	9	9	51	22	1.00	6	5	0	1	12	7		6	7	2	0	15	8
80895	NP_110395.1		ILKAP	ILK associated serine/threonine phosphatase	0	0	12	14	12	12	50	17	1.00	21	13	14	15	63	19	1.00	19	16	12	16	63	22	1.00
3295	NP_000405.1		HSD17B4	hydroxysteroid 17-beta dehydrogenase 4	0	0	9	13	15	13	50	28	1.00	26	13	12	13	64	26	1.00	12	12	11	13	48	23	1.00
64841	NP_932332.1		GNPNAT1	glucosamine-phosphate N-acetyltransferase 1	0	0	16	14	11	9	50	12	1.00	17	9	12	9	47	12	1.00	16	13	11	2	42	10	1.00
64682	NP_073153.1		ANAPC1	anaphase promoting complex subunit 1	1	1	21	14	5	9	49	21	1.00	24	17	11	9	61	27	1.00	25	21	11	9	66	29	1.00
9238	NP_001248763.1		TBRG4	transforming growth factor beta regulator 4	0	0	11	13	9	16	49	19	1.00	6	3	5	6	20	12	1.00	19	5	7	8	39	19	1.00
817	NP_742112.1		CAMK2D	calcium/calmodulin dependent protein kinase II delta	1	0	18	14	6	11	49	16	1.00	16	10	11	14	51	15	1.00	18	12	8	0	38	14	0.75
581	NP_620116.1		BAX	BCL2 associated X, apoptosis regulator	1	0	16	14	8	11	49	12	1.00	5	3	5	4	17	10	1.00	3	11	7	5	26	10	1.00
5422	NP_058633.2		POLA1	DNA polymerase alpha 1, catalytic subunit	0	0	13	17	8	10	48	25	1.00	21	14	11	10	56	28	1.00	35	29	11	11	86	33	1.00
6717	NP_001243820.1		SRI	sorcin	0	0	10	18	9	11	48	17	1.00	10	5	11	15	41	15	1.00	16	12	9	12	49	17	1.00
3420	NP_777280.1		IDH3B	isocitrate dehydrogenase 3 (NAD(+)) beta	3	3	17	13	9	9	48	22	0.93	10	6	6	7	29	20		13	17	7	7	44	22
4351	NP_002426.1		MPI	mannose phosphate isomerase	0	0	13	13	6	16	48	17	1.00	13	7	3	6	29	14	1.00	11	15	5	3	34	13	1.00
81037	NP_110409.2		CLPTM1L	CLPTM1 like	3	3	16	12	11	9	48	13	0.96	2	5	7	7	21	11		8	9	5	7	29	10
65123	NP_075391.3		INTS3	integrator complex subunit 3	2	1	16	13	7	11	47	14	0.99	26	11	10	9	56	18	1.00	24	33	14	16	87	22	1.00
26985	NP_996895.1		AP3M1	adaptor related protein complex 3 mu 1 subunit	0	0	16	15	7	9	47	20	1.00	13	10	14	11	48	20	1.00	26	20	15	13	74	25	1.00
26155	NP_056473.2		NOC2L	NOC2 like nucleolar associated transcriptional repressor	2	2	14	12	8	13	47	19	0.99	19	8	12	11	50	21	0.99	19	13	22	18	72	24	1.00
84259	NP_115675.1		DCUN1D5	defective in cullin neddylation 1 domain containing 5	1	1	19	14	6	8	47	19	1.00	19	10	6	6	41	15	1.00	29	21	9	8	67	17	1.00
2673	NP_002047.2		GFPT1	glutamine--fructose-6-phosphate transaminase 1	1	0	12	14	10	11	47	26	1.00	16	14	18	16	64	32	1.00	23	16	13	13	65	34	1.00
113174	NP_612430.2		SAAL1	serum amyloid A like 1	0	0	10	15	11	11	47	8	1.00	10	2	7	5	24	8	1.00	18	13	12	13	56	9	1.00
55666	NP_060391.2		NPLOC4	NPL4 homolog, ubiquitin recognition factor	0	0	17	15	5	10	47	17	1.00	20	7	11	7	45	17	1.00	21	18	3	11	53	14	1.00
5910	NP_001093896.1		RAP1GDS1	Rap1 GTPase-GDP dissociation stimulator 1	0	0	18	12	11	6	47	22	1.00	10	8	4	10	32	18	1.00	17	21	8	4	50	19	1.00
55276	NP_060760.2		PGM2	phosphoglucomutase 2	0	0	12	25	4	6	47	20	1.00	16	12	10	14	52	27	1.00	18	12	4	6	40	14	1.00
57448	NP_057336.3		BIRC6	baculoviral IAP repeat containing 6	0	0	14	15	10	8	47	32	1.00	12	5	5	6	28	20	1.00	14	6	9	9	38	27	1.00
10447	NP_055703.1		FAM3C	family with sequence similarity 3 member C	3	1	14	15	8	10	47	13	0.98	8	5	5	5	23	7	0.81	13	12	5	7	37	8	0.91
114882	NP_065892.1		OSBPL8	oxysterol binding protein like 8	1	0	18	17	8	4	47	18	1.00	0	0	4	3	7	2		8	11	3	0	22	12
8518	NP_003631.2		IKBKAP	elongator complex protein 1	5	3	10	15	9	12	46	25		15	11	11	12	49	28	0.85	21	27	10	10	68	28
10257	NP_005836.2		ABCC4	ATP binding cassette subfamily C member 4	1	1	19	15	6	7	47	28	1.00	0	2	2	3	7	5		0	0	1	0	1	1
311	NP_665875.1		ANXA11	annexin A11	0	0	14	12	10	10	46	21	1.00	17	10	11	13	51	24	1.00	23	15	13	17	68	29	1.00
63897	NP_071353.4		HEATR6	HEAT repeat containing 6	2	2	15	11	10	10	46	14	1.00	19	11	16	15	61	21	1.00	15	16	9	8	48	18	0.99
6396	NP_001129704.1		SEC13	SEC13 homolog, nuclear pore and COPII coat complex component	3	0	18	16	4	8	46	11	0.88	12	10	6	7	35	9	0.93	13	13	7	6	39	10	0.94
25989	NP_001092906.1		ULK3	unc-51 like kinase 3	1	0	12	11	10	13	46	15	1.00	10	10	18	20	58	20	1.00	9	10	7	10	36	15	1.00
10066	NP_005688.2		SCAMP2	secretory carrier membrane protein 2	2	2	11	17	11	7	46	8	0.98	12	9	4	5	30	8		9	9	5	6	29	8	0.81
5519	NP_001171033.1		PPP2R1B	protein phosphatase 2 scaffold subunit Abeta	1	1	0	0	23	23	46	11		0	0	1	2	3	2		5	5	4	0	14	7	0.75
5869	NP_001238965.1		RAB5B	RAB5B, member RAS oncogene family	1	1	16	15	6	9	46	8	1.00	5	7	4	6	22	8	1.00	10	8	3	7	28	7	1.00
1528	NP_683725.1		CYB5A	cytochrome b5 type A	2	1	22	10	7	7	46	15	0.99	6	5	4	3	18	10	0.84	10	7	5	4	26	13	0.93
8451	NP_003580.1		CUL4A	cullin 4A	0	0	29	8	4	4	45	14	1.00	38	25	27	28	118	21	1.00	30	36	26	20	112	22	1.00
10892	NP_776216.1		MALT1	MALT1 paracaspase	2	1	9	13	11	12	45	14	1.00	12	5	9	9	35	12	0.97	22	17	7	13	59	16	0.99
6723	NP_003123.2		SRM	spermidine synthase	0	0	8	13	8	16	45	16	1.00	14	7	18	13	52	14	1.00	9	17	14	14	54	15	1.00
57418	NP_077005.2		WDR18	WD repeat domain 18	0	0	11	15	10	9	45	19	1.00	9	9	6	9	33	18	1.00	13	10	15	14	52	21	1.00
60493	NP_068598.1		FASTKD5	FAST kinase domains 5	3	1	18	18	5	4	45	12	0.84	20	8	5	4	37	13	0.83	21	13	3	3	40	11
1808	NP_001184222.1		DPYSL2	dihydropyrimidinase like 2	4	1	16	20	3	5	44	23		12	5	6	6	29	20		25	19	8	5	57	27	0.85
10352	NP_056651.1		WARS2	tryptophanyl tRNA synthetase 2, mitochondrial	0	0	14	15	9	7	45	9	1.00	3	4	3	2	12	6	0.99	4	5	6	4	19	8	1.00
3836	NP_002255.3		KPNA1	karyopherin subunit alpha 1	2	1	16	19	4	5	44	7	0.93	18	11	6	4	39	8	0.94	16	30	7	7	60	9	0.99
51433	NP_057321.2		ANAPC5	anaphase promoting complex subunit 5	0	0	17	13	7	7	44	17	1.00	8	8	9	10	35	21	1.00	17	15	7	12	51	20	1.00
28952	NP_054727.1		CCDC22	coiled-coil domain containing 22	0	0	11	14	11	8	44	21	1.00	17	9	8	12	46	20	1.00	13	14	12	11	50	21	1.00
10096	NP_005712.1		ACTR3	ARP3 actin related protein 3 homolog	0	0	18	13	6	7	44	18	1.00	18	8	9	8	43	18	1.00	11	18	7	8	44	17	1.00
125950	NP_597709.2		RAVER1	ribonucleoprotein, PTB binding 1	0	0	14	13	11	6	44	19	1.00	8	9	11	8	36	20	1.00	14	15	5	9	43	18	1.00
54939	NP_060298.2		COMMD4	COMM domain containing 4	0	0	14	16	5	9	44	12	1.00	14	10	6	5	35	12	1.00	14	16	4	6	40	12	1.00
5289	NP_002638.2		PIK3C3	phosphatidylinositol 3-kinase catalytic subunit type 3	0	0	29	14	0	1	44	11		6	3	1	3	13	9		9	8	3	3	23	18	1.00
10134	NP_001132913.1		BCAP31	B-cell receptor associated protein 31	2	2	11	12	11	10	44	14	1.00	7	4	4	4	19	11		9	9	6	4	28	10
826	NP_001740.1		CAPNS1	calpain small subunit 1	0	0	14	18	5	7	44	15	1.00	7	2	2	2	13	7	0.99	8	9	4	6	27	11	1.00
5528	NP_851307.1		PPP2R5D	protein phosphatase 2 regulatory subunit B'delta	0	0	14	16	5	8	43	17	1.00	18	13	13	15	59	20	1.00	21	18	10	15	64	17	1.00
54187	NP_061819.2		NANS	N-acetylneuraminate synthase	0	0	12	17	9	5	43	9	1.00	8	9	9	8	34	9	1.00	14	17	8	11	50	12	1.00
10465	NP_006338.1		PPIH	peptidylprolyl isomerase H	2	0	10	14	8	11	43	9	0.99	10	6	12	11	39	11	0.99	9	10	11	10	40	9	1.00
30844	NP_644670.1		EHD4	EH domain containing 4	0	0	13	14	6	10	43	20	1.00	7	5	10	8	30	16	1.00	7	15	8	5	35	16	1.00
11041	NP_006867.1		B3GNT1	beta-1,4-glucuronyltransferase 1	1	0	18	22	2	1	43	10		16	0	3	0	19	8		4	8	4	0	16	10	0.75
6774	NP_003141.2		STAT3	signal transducer and activator of transcription 3	2	1	22	10	8	3	43	23	0.91	7	0	0	0	7	4		12	12	3	0	27	10
6272	NP_002950.3		SORT1	sortilin 1	3	1	12	11	9	11	43	17	0.98	2	4	6	6	18	9		4	8	8	4	24	8	0.77
9138	NP_004697.2		ARHGEF1	Rho guanine nucleotide exchange factor 1	0	0	16	16	3	7	42	23	1.00	10	5	7	6	28	20	1.00	21	29	12	10	72	32	1.00
84172	NP_061887.2		POLR1B	RNA polymerase I subunit B	1	0	11	10	9	12	42	17	1.00	22	17	11	11	61	25	1.00	21	18	10	10	59	26	1.00
10914	NP_116021.2		PAPOLA	poly(A) polymerase alpha	0	0	16	14	8	4	42	24	1.00	20	10	8	8	46	27	1.00	16	16	5	5	42	22	1.00
54870	NP_060200.2		QRICH1	glutamine rich 1	0	0	17	14	6	5	42	13	1.00	14	5	7	8	34	14	1.00	7	15	4	4	30	12	1.00
9415	NP_004256.1		FADS2	fatty acid desaturase 2	3	3	10	14	10	8	42	18	0.88	6	3	1	2	12	8		9	8	3	1	21	12
4646	NP_004990.3		MYO6	myosin VI	4	2	13	17	6	5	41	21		25	9	5	4	43	25		28	32	11	12	83	34	0.99
10672	NP_006563.2		GNA13	G protein subunit alpha 13	0	0	18	10	8	6	42	14	1.00	0	0	0	0	0	0		0	5	1	2	8	4
54867	NP_001077059.1		TMEM214	transmembrane protein 214	1	0	18	12	5	7	42	15	1.00	0	0	1	0	1	1		4	0	0	0	4	2
51067	NP_001035526.1		YARS2	tyrosyl-tRNA synthetase 2	0	0	16	20	5	0	41	14	0.75	15	7	9	8	39	18	1.00	15	14	15	11	55	19	1.00
11311	NP_009190.2		VPS45	vacuolar protein sorting 45 homolog	2	2	13	10	8	10	41	19	0.99	3	0	6	6	15	8		0	0	4	8	12	9
2110	NP_004444.2		ETFDH	electron transfer flavoprotein dehydrogenase	0	0	17	14	8	2	41	16	1.00	0	0	1	0	1	1		2	1	2	0	5	3
51593	NP_001122324.1		SRRT	serrate, RNA effector molecule	2	2	15	9	7	9	40	20	0.97	16	11	9	9	45	22	1.00	27	31	12	13	83	38	1.00
55055	NP_060445.3		ZWILCH	zwilch kinetochore protein	0	0	12	8	11	9	40	14	1.00	12	7	10	9	38	18	1.00	20	12	5	7	44	18	1.00
51010	NP_057126.2		EXOSC3	exosome component 3	1	0	10	11	10	9	40	12	1.00	15	4	8	10	37	9	1.00	15	16	0	12	43	8	0.75
285636	NP_787117.3		C5orf51	chromosome 5 open reading frame 51	0	0	14	15	6	5	40	11	1.00	8	4	3	2	17	7	0.99	15	16	1	4	36	7	0.75
10658	NP_001166110.1		CELF1	CUGBP Elav-like family member 1	0	0	16	14	4	6	40	16	1.00	14	7	8	10	39	15	1.00	11	8	6	8	33	15	1.00
9670	NP_055467.3		IPO13	importin 13	1	0	12	11	10	7	40	17	1.00	4	4	5	3	16	6	1.00	11	6	5	4	26	10	1.00
9984	NP_005122.2		THOC1	THO complex 1	0	0	10	12	8	9	39	23	1.00	8	9	7	5	29	17	1.00	17	16	5	9	47	21	1.00
23140	NP_055928.3		ZZEF1	zinc finger ZZ-type and EF-hand domain containing 1	0	0	6	18	9	6	39	15	1.00	8	9	7	6	30	13	1.00	19	10	10	7	46	21	1.00
51182	NP_057383.2		HSPA14	heat shock protein family A (Hsp70) member 14	0	0	15	17	5	2	39	13	1.00	8	11	5	5	29	11	1.00	14	14	5	5	38	11	1.00
14	NP_001078.2		AAMP	angio associated migratory cell protein	0	0	12	9	10	8	39	13	1.00	17	7	9	7	40	17	1.00	13	8	7	1	29	11	0.75
10640	NP_006535.1		EXOC5	exocyst complex component 5	0	0	19	8	7	5	39	20	1.00	3	1	5	1	10	8		5	2	5	7	19	12	1.00
51290	NP_057654.2		ERGIC2	ERGIC and golgi 2	3	1	13	17	4	5	39	13	0.84	2	2	0	0	4	2		5	4	3	0	12	4
286410	NP_775965.2		ATP11C	ATPase phospholipid transporting 11C	0	0	11	13	7	8	39	18	1.00	2	1	0	2	5	4		1	3	0	0	4	3
79023	NP_076962.2		NUP37	nucleoporin 37	2	1	15	10	7	6	38	10	0.98	16	11	9	8	44	15	0.99	22	18	9	5	54	17	0.97
5300	NP_006212.1		PIN1	peptidylprolyl cis/trans isomerase, NIMA-interacting 1	1	0	11	10	10	7	38	11	1.00	10	7	5	6	28	9	1.00	14	11	8	8	41	15	1.00
57650	NP_065941.2		KIAA1524	KIAA1524	0	0	13	8	7	10	38	17	1.00	7	2	5	6	20	14	1.00	10	11	6	9	36	18	1.00
2582	NP_001121093.1		GALE	UDP-galactose-4-epimerase	0	0	16	10	7	5	38	16	1.00	10	7	0	2	19	11		16	8	7	3	34	16	1.00
51571	NP_001243692.1		FAM49B	family with sequence similarity 49 member B	1	1	12	9	8	9	38	18	1.00	3	6	5	7	21	15	1.00	12	9	5	7	33	16	1.00
9125	NP_005435.1		RQCD1	CCR4-NOT transcription complex subunit 9	3	2	12	11	6	9	38	16	0.84	6	0	0	1	7	3		8	9	8	7	32	12	0.86
123283	NP_689547.2		TARSL2	threonyl-tRNA synthetase like 2	0	0	14	7	9	8	38	8	1.00	16	0	0	0	16	3		15	0	0	9	24	6
25896	NP_001186740.1		INTS7	integrator complex subunit 7	0	0	6	14	8	10	38	23	1.00	11	7	12	13	43	23	1.00	4	11	4	3	22	11	1.00
2098	NP_001975.1		ESD	esterase D	0	0	10	12	7	8	37	16	1.00	34	22	24	15	95	26	1.00	24	28	21	11	84	21	1.00
8802	NP_003840.2		SUCLG1	succinate-CoA ligase alpha subunit	0	0	13	11	7	6	37	9	1.00	9	8	5	7	29	9	1.00	11	6	7	8	32	9	1.00
214	NP_001230209.1		ALCAM	activated leukocyte cell adhesion molecule	1	0	14	13	5	5	37	16	1.00	0	0	0	0	0	0		11	10	1	0	22	8
5868	NP_004153.2		RAB5A	RAB5A, member RAS oncogene family	2	1	11	12	7	7	37	9	0.99	5	0	5	0	10	5		0	7	6	8	21	6
94005	NP_149975.1		PIGS	phosphatidylinositol glycan anchor biosynthesis class S	1	1	13	10	6	8	37	14	1.00	4	0	0	0	4	2		5	9	0	1	15	4
57511	NP_065802.1		COG6	component of oligomeric golgi complex 6	0	0	11	14	6	6	37	19	1.00	2	0	1	0	3	2		1	0	0	0	1	1
64225	NP_071769.2		ATL2	atlastin GTPase 2	1	0	15	13	4	4	36	16	1.00	15	7	3	2	27	13	1.00	11	21	6	6	44	14	1.00
26098	NP_056423.2		C10orf137	erythroid differentiation regulatory factor 1	0	0	15	17	0	4	36	12	0.75	11	7	0	0	18	6		18	16	3	2	39	12	1.00
30	NP_001598.1		ACAA1	acetyl-CoA acyltransferase 1	2	0	12	10	6	8	36	12	0.98	19	8	6	7	40	12	0.98	15	14	3	6	38	10	0.91
22796	NP_001138508.1		COG2	component of oligomeric golgi complex 2	0	0	10	12	7	7	36	19	1.00	15	10	8	2	35	16	1.00	11	20	4	2	37	17	1.00
51337	NP_057731.1		C8orf55	thioesterase superfamily member 6	3	3	8	10	8	10	36	13	0.79	6	6	6	5	23	10		5	10	5	5	25	9
54928	NP_060283.3		IMPAD1	inositol monophosphatase domain containing 1	0	0	9	10	8	9	36	15	1.00	6	4	2	3	15	6	0.99	7	6	4	4	21	7	1.00
9517	NP_004854.1		SPTLC2	serine palmitoyltransferase long chain base subunit 2	0	0	11	10	6	9	36	17	1.00	3	3	2	0	8	6		0	6	0	4	10	5
5431	NP_000929.1		POLR2B	RNA polymerase II subunit B	5	5	6	10	10	9	35	18		13	12	12	14	51	30		21	24	21	18	84	36	1.00
79659	NP_001073932.1		DYNC2H1	dynein cytoplasmic 2 heavy chain 1	4	4	9	8	9	9	35	28		28	23	15	21	87	52	1.00	30	18	13	14	75	40	0.99
23266	NP_036434.1		LPHN2	adhesion G protein-coupled receptor L2	1	0	8	9	10	9	36	9	1.00	5	3	4	1	13	5		0	6	0	0	6	1
158747	NP_689794.1		MOSPD2	motile sperm domain containing 2	0	0	12	13	4	7	36	17	1.00	6	0	1	2	9	5		2	2	0	1	5	3
56259	NP_110517.2		CTNNBL1	catenin beta like 1	1	0	9	10	9	7	35	13	1.00	16	9	9	12	46	16	1.00	18	20	14	14	66	19	1.00
5557	NP_000937.1		PRIM1	primase (DNA) subunit 1	2	0	11	8	7	9	35	15	0.99	7	6	9	8	30	14	0.97	11	17	6	13	47	16	0.99
57020	NP_064710.4		C16orf62	chromosome 16 open reading frame 62	0	0	7	15	5	8	35	16	1.00	9	7	5	4	25	12	1.00	17	19	6	5	47	17	1.00
6814	NP_009200.2		STXBP3	syntaxin binding protein 3	1	0	12	12	5	6	35	15	1.00	11	6	8	8	33	13	1.00	13	10	6	6	35	15	1.00
738	NP_037397.2		C11orf2	VPS51, GARP complex subunit	1	1	7	10	8	10	35	20	1.00	11	5	12	11	39	20	1.00	7	11	5	11	34	19	1.00
83548	NP_113619.2		COG3	component of oligomeric golgi complex 3	0	0	11	15	5	4	35	9	1.00	9	10	5	5	29	10	1.00	10	9	5	4	28	6	1.00
23478	NP_055115.1		SEC11A	SEC11 homolog A, signal peptidase complex subunit	2	1	14	8	6	7	35	9	0.98	7	4	5	4	20	8	0.88	5	6	2	4	17	7	0.77
80856	NP_085153.1		KIAA1715	lunapark, ER junction formation factor	0	0	14	9	8	4	35	18	1.00	2	3	3	2	10	10	0.99	5	2	5	5	17	12	1.00
6742	NP_001243439.1		SSBP1	single stranded DNA binding protein 1	1	1	14	12	4	5	35	10	1.00	7	4	4	4	19	11	1.00	9	6	2	0	17	9
132001	NP_620162.1		TAMM41	TAM41 mitochondrial translocator assembly and maintenance homolog	0	0	6	9	10	10	35	15	1.00	0	1	2	3	6	5		0	0	6	5	11	5
25831	NP_056197.2		HECTD1	HECT domain E3 ubiquitin protein ligase 1	2	2	6	7	10	11	34	22	0.92	21	9	17	21	68	38	1.00	23	22	18	13	76	38	1.00
51196	NP_057425.3		PLCE1	phospholipase C epsilon 1	0	0	0	34	0	0	34	2		47	13	1	4	65	15	0.75	31	0	0	5	36	6
9733	NP_055521.1		SART3	squamous cell carcinoma antigen recognized by T-cells 3	1	0	14	7	7	6	34	23	1.00	11	8	11	9	39	24	1.00	18	14	12	14	58	24	1.00
56984	NP_064617.2		PSMG2	proteasome assembly chaperone 2	2	1	13	13	4	4	34	13	0.91	23	10	4	3	40	14	0.87	17	16	3	3	39	12	0.84
8975	NP_003931.2		USP13	ubiquitin specific peptidase 13 (isopeptidase T-3)	0	0	13	12	9	0	34	15	0.75	10	5	8	8	31	15	1.00	1	12	7	10	30	15	0.75
4719	NP_001186910.1		NDUFS1	NADH:ubiquinone oxidoreductase core subunit S1	2	1	11	12	5	6	34	18	0.96	5	6	6	7	24	15	0.94	8	9	5	2	24	12	0.82
9577	NP_954664.1		BRE	BRISC and BRCA1 A complex member 2	0	0	13	9	6	6	34	6	1.00	12	7	7	8	34	5	1.00	8	9	0	7	24	3	0.75
9868	NP_055635.3		TOMM70A	translocase of outer mitochondrial membrane 70	0	0	9	14	5	6	34	13	1.00	7	2	6	6	21	11	1.00	6	8	4	3	21	11	1.00
10159	NP_005756.2		ATP6AP2	ATPase H+ transporting accessory protein 2	2	0	8	12	4	10	34	17	0.95	3	0	0	2	5	3		5	5	3	2	15	9
1861	NP_000104.1		TOR1A	torsin family 1 member A	1	1	10	6	9	9	34	19	1.00	0	0	7	4	11	6		0	0	9	6	15	9
51451	NP_057393.2		LCMT1	leucine carboxyl methyltransferase 1	0	0	15	11	4	4	34	10	1.00	12	6	5	5	28	9	1.00	6	1	2	4	13	7
100529144	NP_001188408.1		CORO7-PAM16	CORO7-PAM16 readthrough	0	0	13	6	7	7	33	15	1.00	14	9	0	0	23	10		18	27	9	12	66	26	1.00
283871	NP_001035830.1		PGP	phosphoglycolate phosphatase	0	0	8	7	9	9	33	11	1.00	17	10	14	13	54	12	1.00	19	16	10	13	58	13	1.00
55698	NP_060529.4		RADIL	Rap associating with DIL domain	0	0	5	8	9	11	33	13	1.00	16	8	17	13	54	22	1.00	17	14	12	9	52	19	1.00
80155	NP_476516.1		NAA15	N(alpha)-acetyltransferase 15, NatA auxiliary subunit	2	1	11	9	6	7	33	19	0.98	11	5	7	10	33	23	0.97	17	10	11	9	47	24	1.00
3978	NP_000225.1		LIG1	DNA ligase 1	0	0	8	10	7	8	33	18	1.00	13	4	4	4	25	13	1.00	16	16	5	4	41	18	1.00
54536	NP_001013870.1		EXOC6	exocyst complex component 6	0	0	12	13	3	5	33	10	1.00	10	6	3	0	19	6		17	18	0	5	40	13	0.75
10097	NP_005713.1		ACTR2	ARP2 actin related protein 2 homolog	0	0	8	15	4	6	33	11	1.00	17	9	11	10	47	14	1.00	7	13	11	8	39	10	1.00
1656	NP_004388.2		DDX6	DEAD-box helicase 6	0	0	6	11	6	10	33	17	1.00	17	5	7	10	39	17	1.00	12	12	5	6	35	11	1.00
149371	NP_787072.2		EXOC8	exocyst complex component 8	0	0	10	10	7	6	33	17	1.00	6	2	5	6	19	12	1.00	11	13	4	5	33	12	1.00
64328	NP_071904.4		XPO4	exportin 4	0	0	10	11	7	5	33	15	1.00	6	2	5	3	16	10	1.00	6	9	7	3	25	13	1.00
10801	NP_006631.2		SEPT9	septin 9	0	0	9	11	9	4	33	8	1.00	9	4	6	6	25	9	1.00	12	8	0	4	24	8	0.75
2590	NP_004472.1		GALNT2	polypeptide N-acetylgalactosaminyltransferase 2	1	0	14	8	6	5	33	20	1.00	0	0	0	0	0	0		5	5	0	4	14	7	0.75
8560	NP_003667.1		DEGS1	delta 4-desaturase, sphingolipid 1	1	0	12	10	6	5	33	9	1.00	2	2	0	0	4	3		3	6	0	0	9	4
23654	NP_036533.2		PLXNB2	plexin B2	0	0	13	8	6	6	33	22	1.00	0	0	0	1	1	1		0	3	1	3	7	7
307	NP_001144.1		ANXA4	annexin A4	0	0	13	8	7	4	32	20	1.00	15	11	5	9	40	21	1.00	14	16	13	10	53	22	1.00
9943	NP_005100.1		OXSR1	oxidative stress responsive 1	0	0	8	11	6	7	32	18	1.00	6	4	11	11	32	12	1.00	17	6	11	7	41	14	1.00
55770	NP_060773.3		EXOC2	exocyst complex component 2	0	0	7	4	9	12	32	15	1.00	6	8	14	6	34	21	1.00	7	6	14	11	38	18	1.00
8295	NP_001231509.1		TRRAP	transformation/transcription domain associated protein	0	0	10	6	6	10	32	23	1.00	6	6	11	10	33	22	1.00	4	6	7	6	23	19	1.00
160418	NP_861448.2		TMTC3	transmembrane and tetratricopeptide repeat containing 3	0	0	11	15	0	6	32	8	0.75	2	0	0	0	2	1		10	3	3	3	19	6	1.00
284161	NP_872375.2		GDPD1	glycerophosphodiester phosphodiesterase domain containing 1	0	0	8	7	9	8	32	13	1.00	0	2	0	2	4	4		0	4	4	3	11	8
3069	NP_976221.1		HDLBP	high density lipoprotein binding protein	2	2	8	13	5	5	31	19		11	6	10	10	37	23	0.94	12	23	12	11	58	33	1.00
65985	NP_076417.2		AACS	acetoacetyl-CoA synthetase	0	0	5	9	8	10	32	19	1.00	0	0	2	0	2	2		0	3	4	0	7	5
114790	NP_443134.2		STK11IP	serine/threonine kinase 11 interacting protein	0	0	9	9	6	8	32	12	1.00	2	1	3	3	9	4		2	0	2	1	5	3
9689	NP_001193996.1		BZW1	basic leucine zipper and W2 domains 1	1	1	5	9	8	9	31	17	1.00	7	3	7	5	22	14	1.00	8	10	13	14	45	20	1.00
79050	NP_076983.1		NOC4L	nucleolar complex associated 4 homolog	2	1	4	9	10	8	31	15	0.95	3	0	3	4	10	7		15	6	12	9	42	23	0.98
51434	NP_057322.2		ANAPC7	anaphase promoting complex subunit 7	1	1	9	10	3	9	31	15	1.00	17	9	8	8	42	20	1.00	7	12	11	11	41	20	1.00
10277	NP_001099032.1		UBE4B	ubiquitination factor E4B	0	0	12	12	3	4	31	13	1.00	14	3	9	6	32	15	1.00	8	11	9	10	38	14	1.00
8027	NP_003464.1		STAM	signal transducing adaptor molecule	0	0	12	8	6	5	31	18	1.00	7	5	8	8	28	16	1.00	10	12	6	8	36	19	1.00
55140	NP_060561.3		ELP3	elongator acetyltransferase complex subunit 3	1	1	8	7	6	10	31	18	1.00	5	4	5	9	23	14	1.00	7	10	7	5	29	14	1.00
148223	NP_689695.2		C19orf25	chromosome 19 open reading frame 25	1	1	10	12	5	4	31	7	1.00	9	6	3	3	21	5	1.00	10	12	6	0	28	4	0.75
80335	NP_079498.2		WDR82	WD repeat domain 82	1	0	7	11	6	7	31	15	1.00	8	7	3	7	25	11	1.00	6	7	7	5	25	12	1.00
4218	NP_005361.2		RAB8A	RAB8A, member RAS oncogene family	3	2	10	7	7	7	31	11	0.78	6	4	4	2	16	10		8	6	7	2	23	10
25938	NP_056288.2		HEATR5A	HEAT repeat containing 5A	0	0	13	13	1	4	31	11	0.75	6	4	0	0	10	2		5	6	2	2	15	7	0.99
56948	NP_064580.2		SDR39U1	short chain dehydrogenase/reductase family 39U member 1	0	0	10	8	7	6	31	8	1.00	6	3	1	2	12	6		5	4	3	2	14	5	0.99
80305	NP_079480.2		TRABD	TraB domain containing	1	1	13	12	3	3	31	12	1.00	5	4	2	3	14	10	0.99	4	3	0	0	7	4
402	NP_001658.2		ARL2	ADP ribosylation factor like GTPase 2	0	0	10	9	3	8	30	11	1.00	10	8	9	8	35	13	1.00	13	19	8	9	49	16	1.00
58497	NP_067045.1		PRUNE	prune exopolyphosphatase 1	2	1	6	10	5	9	30	18	0.96	3	4	8	6	21	12	0.86	10	12	7	6	35	18	0.98
51534	NP_057569.2		VTA1	vesicle trafficking 1	0	0	7	8	6	9	30	11	1.00	8	9	7	9	33	11	1.00	5	8	11	8	32	10	1.00
51072	NP_001131074.1		MEMO1	mediator of cell motility 1	1	0	8	11	4	7	30	13	1.00	5	6	7	8	26	14	1.00	10	11	5	4	30	15	1.00
5861	NP_004152.1		RAB1A	RAB1A, member RAS oncogene family	0	0	11	7	5	7	30	8	1.00	4	7	4	3	18	9	1.00	5	7	7	7	26	7	1.00
9522	NP_004857.4		SCAMP1	secretory carrier membrane protein 1	0	0	8	12	6	4	30	14	1.00	2	2	2	2	8	4	0.98	9	7	2	3	21	9	1.00
6416	NP_003001.1		MAP2K4	mitogen-activated protein kinase kinase 4	0	0	10	11	4	5	30	13	1.00	7	2	2	3	14	9	0.99	6	4	3	3	16	12	1.00
56907	NP_064533.3		SPIRE1	spire type actin nucleation factor 1	0	0	29	0	0	0	29	1		0	0	0	0	0	0		40	30	37	0	107	4	0.75
55706	NP_060557.3		TMEM48	NDC1 transmembrane nucleoporin	0	0	12	8	5	5	30	12	1.00	9	3	2	6	20	11	1.00	2	4	3	0	9	5
4233	NP_001120972.1		MET	MET proto-oncogene, receptor tyrosine kinase	2	0	4	4	10	12	30	11	0.91	0	0	2	0	2	2		2	4	0	2	8	5
8697	NP_004652.2		CDC23	cell division cycle 23	3	2	4	4	8	13	29	15		11	7	8	8	34	18	0.87	11	13	13	8	45	17	0.97
6093	NP_005397.1		ROCK1	Rho associated coiled-coil containing protein kinase 1	0	0	7	7	7	8	29	18	1.00	1	5	3	4	13	10		20	16	8	11	55	33	1.00
85440	NP_212132.2		DOCK7	dedicator of cytokinesis 7	1	1	11	8	5	5	29	14	1.00	14	8	9	5	36	16	1.00	13	16	10	15	54	27	1.00
5295	NP_852664.1		PIK3R1	phosphoinositide-3-kinase regulatory subunit 1	0	0	12	10	3	4	29	10	1.00	9	3	3	7	22	12	1.00	12	12	5	6	35	16	1.00
4928	NP_057404.2		NUP98	nucleoporin 98	0	0	11	6	9	3	29	11	1.00	3	7	9	4	23	12	1.00	7	11	10	6	34	13	1.00
51115	NP_057117.2		FAM82B	regulator of microtubule dynamics 1	0	0	8	9	6	6	29	12	1.00	15	8	9	8	40	17	1.00	7	12	7	6	32	12	1.00
4999	NP_006181.1		ORC2	origin recognition complex subunit 2	0	0	12	10	3	4	29	7	1.00	10	5	4	4	23	8	1.00	8	10	4	6	28	8	1.00
10059	NP_036192.2		DNM1L	dynamin 1 like	1	0	14	4	3	8	29	19	1.00	6	4	3	0	13	10		6	11	5	4	26	16	1.00
5298	NP_001185702.1		PI4KB	phosphatidylinositol 4-kinase beta	1	0	10	11	0	8	29	16	0.75	9	13	7	5	34	19	1.00	9	3	5	2	19	9	1.00
51100	NP_001193580.1		SH3GLB1	SH3 domain containing GRB2 like, endophilin B1	0	0	12	10	2	5	29	13	1.00	7	4	2	2	15	9	0.99	8	6	3	2	19	9	1.00
6386	NP_001007068.1		SDCBP	syndecan binding protein	0	0	0	12	7	10	29	5	0.75	0	1	0	0	1	1		3	5	5	0	13	4
10360	NP_008924.1		NPM3	nucleophosmin/nucleoplasmin 3	3	3	8	8	6	6	28	6		5	7	5	5	22	8		12	13	10	12	47	8	0.98
10466	NP_006339.3		COG5	component of oligomeric golgi complex 5	0	0	8	9	8	4	29	19	1.00	0	0	0	2	2	2		0	0	7	2	9	6
9497	NP_003606.3		SLC4A7	solute carrier family 4 member 7	0	0	14	10	3	2	29	10	1.00	2	0	1	0	3	2		2	0	0	0	2	1
2873	NP_997657.1		GPS1	G protein pathway suppressor 1	0	0	8	11	3	6	28	13	1.00	15	7	9	10	41	17	1.00	15	9	10	6	40	13	1.00
112936	NP_443107.1		VPS26B	VPS26, retromer complex component B	1	1	13	10	3	2	28	14	1.00	10	5	1	2	18	11		13	10	7	10	40	19	1.00
57466	NP_001138916.1		SCAF4	SR-related CTD associated factor 4	0	0	7	7	7	7	28	7	1.00	7	3	5	5	20	6	1.00	10	8	10	9	37	10	1.00
11196	NP_009121.1		SEC23IP	SEC23 interacting protein	0	0	8	9	5	6	28	15	1.00	6	6	11	8	31	18	1.00	14	7	6	8	35	14	1.00
10197	NP_005780.2		PSME3	proteasome activator subunit 3	2	1	11	9	3	5	28	12	0.89	14	8	9	12	43	18	0.99	9	13	7	3	32	16	0.91
25904	NP_056257.1		CNOT10	CCR4-NOT transcription complex subunit 10	1	1	8	8	6	6	28	13	1.00	10	6	4	5	25	9	1.00	7	7	4	4	22	10	1.00
4171	NP_004517.2		MCM2	minichromosome maintenance complex component 2	0	0	8	9	4	7	28	12	1.00	11	8	7	8	34	18	1.00	8	4	2	6	20	12	1.00
23049	NP_055907.3		SMG1	SMG1, nonsense mediated mRNA decay associated PI3K related kinase	0	0	4	6	9	9	28	21	1.00	12	5	3	4	24	15	1.00	4	5	6	5	20	16	1.00
83693	NP_113651.4		HSDL1	hydroxysteroid dehydrogenase like 1	0	0	6	7	7	8	28	12	1.00	4	6	6	8	24	10	1.00	4	4	7	4	19	10	1.00
80727	NP_079526.1		TTYH3	tweety family member 3	0	0	10	7	5	6	28	5	1.00	5	3	3	1	12	5		2	6	3	4	15	4	0.99
2771	NP_002061.1		GNAI2	G protein subunit alpha i2	3	1	10	9	3	6	28	11	0.79	4	0	3	3	10	3		0	6	0	1	7	3
6102	NP_008846.2		RP2	RP2, ARL3 GTPase activating protein	0	0	7	10	5	6	28	10	1.00	0	0	0	0	0	0		0	0	0	0	0	0
10456	NP_006109.2		HAX1	HCLS1 associated protein X-1	4	3	8	7	6	6	27	13		15	4	7	7	33	13		14	12	10	8	44	14	0.76
23636	NP_036478.2		NUP62	nucleoporin 62	3	2	5	10	8	4	27	14		10	6	3	2	21	8		11	15	7	6	39	13	0.78
3839	NP_002258.2		KPNA3	karyopherin subunit alpha 3	1	0	9	6	7	5	27	16	1.00	20	18	12	14	64	22	1.00	25	29	11	6	71	21	1.00
55622	NP_060205.3		TTC27	tetratricopeptide repeat domain 27	2	1	9	4	7	7	27	13	0.94	13	6	5	8	32	13	0.96	21	10	10	8	49	18	0.99
6832	NP_003162.2		SUPV3L1	Suv3 like RNA helicase	0	0	7	8	5	7	27	14	1.00	9	7	6	4	26	14	1.00	11	13	7	7	38	17	1.00
51056	NP_056991.2		LAP3	leucine aminopeptidase 3	0	0	9	8	3	7	27	11	1.00	15	9	8	3	35	17	1.00	16	14	2	5	37	15	1.00
55860	NP_060947.1		ACTR10	actin related protein 10 homolog	1	1	8	10	7	2	27	10	1.00	7	7	5	4	23	12	1.00	13	9	5	6	33	12	1.00
9352	NP_004777.1		TXNL1	thioredoxin like 1	0	0	12	4	6	5	27	11	1.00	6	5	0	5	16	8	0.75	10	14	3	6	33	13	1.00
51611	NP_057042.2		DPH5	diphthamide biosynthesis 5	0	0	9	5	9	4	27	8	1.00	16	6	12	8	42	14	1.00	5	10	8	3	26	9	1.00
9060	NP_004661.2		PAPSS2	3'-phosphoadenosine 5'-phosphosulfate synthase 2	0	0	12	7	4	4	27	10	1.00	6	3	2	3	14	6	0.99	6	6	2	4	18	9	1.00
11031	NP_006859.2		RAB31	RAB31, member RAS oncogene family	0	0	7	10	4	6	27	8	1.00	6	3	2	0	11	6		9	4	0	5	18	6	0.75
5163	NP_002601.1		PDK1	pyruvate dehydrogenase kinase 1	0	0	13	10	2	2	27	11	0.99	9	6	0	0	15	6		6	10	0	1	17	7
11230	NP_009144.1		PRAF2	PRA1 domain family member 2	2	1	7	9	5	6	27	8	0.95	3	3	3	0	9	4		5	4	3	4	16	6	0.81
79587	NP_078813.1		CARS2	cysteinyl-tRNA synthetase 2, mitochondrial (putative)	0	0	5	10	6	6	27	18	1.00	6	8	8	5	27	17	1.00	4	5	4	3	16	10	1.00
201595	NP_849193.1		STT3B	STT3B, catalytic subunit of the oligosaccharyltransferase complex	1	1	4	10	5	8	27	15	1.00	2	0	4	5	11	7		4	4	1	5	14	9	0.75
55831	NP_060917.1		TMEM111	ER membrane protein complex subunit 3	0	0	12	10	2	3	27	11	1.00	0	0	0	0	0	0		4	6	2	1	13	8
23649	NP_002680.2		POLA2	DNA polymerase alpha 2, accessory subunit	0	0	11	14	0	1	26	8		13	6	0	3	22	10		14	17	9	10	50	16	1.00
55239	NP_060703.3		OGFOD1	2-oxoglutarate and iron dependent oxygenase domain containing 1	0	0	12	8	2	5	27	9	1.00	8	5	7	6	26	11	1.00	7	4	0	2	13	6
871	NP_001226.2		SERPINH1	serpin family H member 1	3	2	8	6	6	6	26	17		5	3	4	5	17	12		8	11	6	10	35	21	0.82
22979	NP_055786.1		EFR3B	EFR3 homolog B	0	0	9	13	2	3	27	11	1.00	5	2	0	0	7	3		0	2	0	0	2	1
5822	NP_005040.2		PWP2	PWP2, small subunit processome component	2	2	7	4	8	7	26	13	0.75	11	7	8	7	33	15	0.95	11	6	9	11	37	19	0.94
51377	NP_001186190.1		UCHL5	ubiquitin C-terminal hydrolase L5	1	0	9	7	5	5	26	12	1.00	7	4	6	8	25	12	1.00	10	8	7	7	32	15	1.00
445	NP_446464.1		ASS1	argininosuccinate synthase 1	0	0	7	11	3	5	26	8	1.00	14	4	6	7	31	12	1.00	12	7	5	5	29	11	1.00
53407	NP_058626.1		STX18	syntaxin 18	1	1	8	9	5	4	26	5	1.00	2	3	5	3	13	5	0.99	6	10	4	5	25	4	1.00
11047	NP_008933.2		ADRM1	adhesion regulating molecule 1	2	2	9	6	5	6	26	8	0.76	6	5	7	7	25	8	0.77	5	4	2	7	18	7
219	NP_000683.3		ALDH1B1	aldehyde dehydrogenase 1 family member B1	1	0	6	8	5	7	26	13	1.00	4	3	2	4	13	8	0.99	1	3	4	6	14	10
54732	NP_059980.2		TMED9	transmembrane p24 trafficking protein 9	0	0	11	7	2	6	26	9	1.00	5	0	0	0	5	2		4	2	0	0	6	3
64746	NP_073572.2		ACBD3	acyl-CoA binding domain containing 3	0	0	11	11	3	0	25	10		14	5	4	6	29	10	1.00	17	13	5	8	43	19	1.00
6509	NP_003029.2		SLC1A4	solute carrier family 1 member 4	0	0	2	10	6	8	26	8	1.00	3	0	5	5	13	6		1	0	0	0	1	1
8881	NP_001072113.1		CDC16	cell division cycle 16	4	2	10	9	2	4	25	11		10	6	9	10	35	14		6	10	11	10	37	13	0.75
8760	NP_003809.1		CDS2	CDP-diacylglycerol synthase 2	0	0	9	13	0	4	26	5	0.75	0	0	1	0	1	1		0	0	0	0	0	0
3421	NP_004126.1		IDH3G	isocitrate dehydrogenase 3 (NAD(+)) gamma	1	0	12	7	3	3	25	12	1.00	9	5	7	8	29	12	1.00	12	13	6	7	38	14	1.00
7094	NP_006280.3		TLN1	talin 1	2	1	10	8	4	3	25	8	0.87	6	0	2	3	11	7		12	8	6	7	33	15	0.98
283464	NP_001093120.1		GXYLT1	glucoside xylosyltransferase 1	1	0	7	6	7	5	25	7	1.00	8	6	4	6	24	7	1.00	12	12	0	9	33	9	0.75
51119	NP_057122.2		SBDS	SBDS, ribosome maturation factor	1	0	7	12	3	3	25	12	1.00	11	11	5	4	31	17	1.00	10	10	5	4	29	12	1.00
57508	NP_065799.1		INTS2	integrator complex subunit 2	1	0	8	7	7	3	25	11	1.00	18	8	9	5	40	14	1.00	8	7	10	3	28	14	1.00
8209	NP_004640.3		C21orf33	chromosome 21 open reading frame 33	1	0	9	12	1	3	25	7		8	9	2	2	21	8	0.99	10	7	2	3	22	7	1.00
23595	NP_001184188.1		ORC3	origin recognition complex subunit 3	0	0	5	10	5	5	25	10	1.00	14	4	2	4	24	13	1.00	8	6	6	6	26	11	1.00
5529	NP_006237.1		PPP2R5E	protein phosphatase 2 regulatory subunit B'epsilon	0	0	12	7	2	4	25	11	1.00	6	0	0	0	6	2		10	11	0	2	23	6
2531	NP_002026.1		KDSR	3-ketodihydrosphingosine reductase	0	0	8	7	4	6	25	10	1.00	2	2	3	2	9	4	0.99	7	6	4	3	20	8	1.00
8879	NP_003892.2		SGPL1	sphingosine-1-phosphate lyase 1	2	1	6	6	8	5	25	13	0.95	4	3	5	2	14	8		7	3	5	2	17	8
9158	NP_942600.1		FIBP	FGF1 intracellular binding protein	0	0	14	5	3	3	25	11	1.00	9	6	6	4	25	12	1.00	4	5	3	1	13	8
83787	NP_001154481.1		ARMC10	armadillo repeat containing 10	0	0	7	11	3	4	25	11	1.00	8	2	3	5	18	8	1.00	4	6	0	2	12	5
201626	NP_808881.3		PDE12	phosphodiesterase 12	0	0	6	9	3	7	25	8	1.00	7	4	7	2	20	7	1.00	7	2	1	1	11	6
55240	NP_878919.2		STEAP3	STEAP3 metalloreductase	0	0	10	11	4	0	25	8	0.75	0	0	0	0	0	0		0	0	0	0	0	0
51692	NP_057291.1		CPSF3	cleavage and polyadenylation specific factor 3	0	0	14	8	2	0	24	9		13	8	3	5	29	13	1.00	17	14	5	6	42	16	1.00
5426	NP_006222.2		POLE	DNA polymerase epsilon, catalytic subunit	0	0	15	3	3	3	24	14	1.00	15	7	11	4	37	24	1.00	21	21	2	11	55	27	1.00
2037	NP_001422.1		EPB41L2	erythrocyte membrane protein band 4.1 like 2	0	0	7	9	4	4	24	14	1.00	8	4	5	4	21	13	1.00	15	13	6	8	42	19	1.00
5048	NP_000421.1		PAFAH1B1	platelet activating factor acetylhydrolase 1b regulatory subunit 1	0	0	11	6	4	3	24	13	1.00	6	4	3	4	17	12	1.00	7	12	6	7	32	14	1.00
80279	NP_788276.1		CDK5RAP3	CDK5 regulatory subunit associated protein 3	0	0	8	7	4	5	24	8	1.00	11	4	4	4	23	10	1.00	12	10	6	3	31	15	1.00
23380	NP_001036223.1		SRGAP2	SLIT-ROBO Rho GTPase activating protein 2	0	0	7	8	5	4	24	5	1.00	8	5	5	4	22	6	1.00	11	8	6	5	30	8	1.00
84340	NP_115756.2		GFM2	G elongation factor mitochondrial 2	1	0	7	7	4	6	24	12	1.00	6	1	5	4	16	8	0.75	8	10	3	8	29	11	1.00
25801	NP_036330.1		GCA	grancalcin	0	0	7	7	7	3	24	12	1.00	9	3	3	3	18	9	1.00	12	11	3	1	27	11
9698	NP_055491.1		PUM1	pumilio RNA binding family member 1	2	1	5	8	6	5	24	13	0.93	11	6	4	6	27	13	0.93	7	5	2	7	21	13	0.81
124454	NP_001077083.1		EARS2	glutamyl-tRNA synthetase 2, mitochondrial	0	0	6	10	7	1	24	9	0.75	7	6	7	9	29	11	1.00	5	6	4	4	19	10	1.00
10314	NP_001130046.1		LANCL1	LanC like 1	1	0	5	8	4	7	24	14	1.00	5	3	4	3	15	9	1.00	6	6	3	3	18	9	1.00
80324	NP_001002019.1		PUS1	pseudouridylate synthase 1	0	0	6	8	3	7	24	9	1.00	11	5	6	5	27	12	1.00	5	0	6	6	17	5	0.75
26090	NP_001035937.1		ABHD12	abhydrolase domain containing 12	1	0	7	8	4	5	24	9	1.00	2	0	3	3	8	5		6	5	0	3	14	6
128869	NP_536724.1		PIGU	phosphatidylinositol glycan anchor biosynthesis class U	1	0	10	6	4	4	24	7	1.00	2	3	1	1	7	4		4	6	0	2	12	3
178	NP_000019.2		AGL	amylo-alpha-1, 6-glucosidase, 4-alpha-glucanotransferase	0	0	3	10	7	4	24	15	1.00	6	4	7	6	23	13	1.00	2	2	4	4	12	9	0.99
55732	NP_060656.2		C1orf112	chromosome 1 open reading frame 112	0	0	2	10	6	6	24	11	1.00	4	1	5	2	12	5		4	2	1	4	11	6
11065	NP_861517.1		UBE2C	ubiquitin conjugating enzyme E2 C	0	0	9	8	5	2	24	10	1.00	3	5	2	0	10	6		0	2	4	2	8	4
2677	NP_000812.2		GGCX	gamma-glutamyl carboxylase	0	0	9	6	5	4	24	9	1.00	3	0	1	3	7	4		4	0	2	2	8	5
81502	NP_110416.1		HM13	histocompatibility minor 13	2	1	9	9	3	3	24	10	0.83	1	1	2	0	4	4		3	1	2	1	7	6
3673	NP_002194.2		ITGA2	integrin subunit alpha 2	0	0	10	9	3	2	24	15	1.00	0	0	0	0	0	0		2	0	3	1	6	4
10999	NP_005085.2		SLC27A4	solute carrier family 27 member 4	1	0	7	11	3	3	24	15	1.00	0	0	1	6	7	5		2	0	3	0	5	4
10211	NP_005794.1		FLOT1	flotillin 1	0	0	6	10	6	2	24	14	1.00	0	0	0	0	0	0		0	2	0	0	2	1
93185	NP_443100.1		IGSF8	immunoglobulin superfamily member 8	0	0	7	5	6	6	24	14	1.00	0	0	0	0	0	0		0	0	0	1	1	1
51170	NP_057329.2		HSD17B11	hydroxysteroid 17-beta dehydrogenase 11	0	0	6	6	6	6	24	12	1.00	0	2	3	0	5	4		0	1	0	0	1	1
8884	NP_066918.2		SLC5A6	solute carrier family 5 member 6	0	0	7	7	4	6	24	10	1.00	0	0	0	0	0	0		0	0	0	0	0	0
51765	NP_001035918.1		MST4	serine/threonine kinase 26	1	0	5	10	3	5	23	9	1.00	23	11	10	10	54	15	1.00	26	21	4	10	61	21	1.00
9107	NP_004676.3		MTMR6	myotubularin related protein 6	2	0	6	8	5	4	23	13	0.92	8	5	4	5	22	12	0.91	14	17	5	5	41	21	0.95
7812	NP_001123995.1		CSDE1	cold shock domain containing E1	0	0	8	6	4	5	23	17	1.00	13	6	7	6	32	21	1.00	16	6	10	9	41	27	1.00
55181	NP_060619.4		SMG8	SMG8, nonsense mediated mRNA decay factor	0	0	7	9	6	1	23	9	0.75	0	3	4	4	11	9		7	4	12	8	31	16	1.00
27336	NP_055315.2		HTATSF1	HIV-1 Tat specific factor 1	0	0	11	3	4	5	23	11	1.00	7	3	5	8	23	12	1.00	7	11	6	6	30	13	1.00
10300	NP_005877.2		KATNB1	katanin regulatory subunit B1	2	1	4	8	6	5	23	10	0.92	4	2	2	0	8	4		8	13	3	5	29	11	0.89
80218	NP_079422.1		NAA50	N(alpha)-acetyltransferase 50, NatE catalytic subunit	0	0	5	4	7	7	23	8	1.00	9	8	8	7	32	10	1.00	6	7	7	8	28	13	1.00
28988	NP_001116428.1		DBNL	drebrin like	0	0	7	10	1	5	23	10	0.75	10	6	4	2	22	9	1.00	3	11	6	4	24	13	1.00
1155	NP_001272.2		TBCB	tubulin folding cofactor B	0	0	5	5	6	7	23	14	1.00	6	4	6	6	22	13	1.00	8	5	7	4	24	11	1.00
85021	NP_114128.3		REPS1	RALBP1 associated Eps domain containing 1	0	0	9	6	2	6	23	9	1.00	9	5	5	6	25	5	1.00	6	5	6	6	23	6	1.00
23412	NP_036203.1		COMMD3	COMM domain containing 3	0	0	10	6	5	2	23	8	1.00	4	5	0	3	12	7		8	11	3	0	22	7
5983	NP_002906.1		RFC3	replication factor C subunit 3	3	0	6	4	8	5	23	17	0.79	8	3	2	4	17	12		6	3	3	3	15	12
23382	NP_001124192.1		AHCYL2	adenosylhomocysteinase like 2	0	0	9	3	5	6	23	13	1.00	4	1	5	3	13	7		5	0	5	4	14	6	0.75
8727	NP_003789.1		CTNNAL1	catenin alpha like 1	0	0	9	9	2	3	23	8	1.00	2	0	0	0	2	1		5	4	2	2	13	8	0.99
51324	NP_001121361.1		SPG21	SPG21, maspardin	1	0	11	4	3	5	23	9	1.00	3	0	3	2	8	5		4	3	3	0	10	7
79065	NP_001070666.1		ATG9A	autophagy related 9A	0	0	7	8	5	3	23	12	1.00	3	2	4	2	11	7	0.99	2	2	4	1	9	5
84342	NP_115758.3		COG8	component of oligomeric golgi complex 8	0	0	5	10	3	5	23	8	1.00	0	0	2	1	3	3		6	1	0	0	7	2
11160	NP_009106.1		ERLIN2	ER lipid raft associated 2	0	0	8	5	4	6	23	13	1.00	2	0	0	0	2	1		3	0	0	0	3	2
1889	NP_001106818.1		ECE1	endothelin converting enzyme 1	0	0	4	8	5	6	23	11	1.00	0	0	0	2	2	2		0	0	1	1	2	2
5432	NP_116558.1		POLR2C	RNA polymerase II subunit C	0	0	7	5	5	5	22	10	1.00	7	5	5	6	23	10	1.00	8	15	2	5	30	13	1.00
51026	NP_057156.1		GOLT1B	golgi transport 1B	0	0	2	7	7	6	22	8	1.00	3	3	5	5	16	4	1.00	6	9	2	7	24	5	1.00
3611	NP_004508.1		ILK	integrin linked kinase	0	0	6	7	5	4	22	11	1.00	9	4	7	8	28	11	1.00	8	4	6	5	23	8	1.00
9061	NP_005434.4		PAPSS1	3'-phosphoadenosine 5'-phosphosulfate synthase 1	0	0	9	8	3	2	22	10	1.00	14	5	2	2	23	12	0.99	12	6	4	1	23	10	0.75
5530	NP_001124163.1		PPP3CA	protein phosphatase 3 catalytic subunit alpha	0	0	5	6	8	3	22	13	1.00	8	4	4	3	19	12	1.00	3	8	5	4	20	13	1.00
5921	NP_072179.1		RASA1	RAS p21 protein activator 1	0	0	5	6	5	6	22	13	1.00	3	3	8	6	20	12	1.00	4	3	8	5	20	12	1.00
84520	NP_115879.2		C14orf142	GON7, KEOPS complex subunit homolog	0	0	7	5	5	5	22	6	1.00	6	3	2	0	11	3		10	5	0	3	18	4
124540	NP_620412.1		MSI2	musashi RNA binding protein 2	1	0	6	10	3	3	22	9	1.00	4	2	0	0	6	2		6	8	4	0	18	9	0.75
54884	NP_060220.3		RETSAT	retinol saturase	1	0	4	3	7	8	22	7	1.00	11	3	5	5	24	7	1.00	3	6	4	4	17	4	1.00
23171	NP_055956.1		GPD1L	glycerol-3-phosphate dehydrogenase 1 like	0	0	4	7	6	5	22	10	1.00	5	2	4	4	15	9	1.00	3	7	3	2	15	9	0.99
4255	NP_002403.2		MGMT	O-6-methylguanine-DNA methyltransferase	0	0	8	8	3	3	22	6	1.00	1	4	7	0	12	5		4	2	3	4	13	5	0.99
662	NP_053582.2		BNIP1	BCL2 interacting protein 1	1	0	6	5	5	6	22	9	1.00	2	1	3	0	6	4		3	3	3	2	11	6	0.99
4363	NP_004987.2		ABCC1	ATP binding cassette subfamily C member 1	1	0	9	6	3	4	22	13	1.00	1	2	2	2	7	7		2	4	2	0	8	6
57130	NP_065143.2		ATP13A1	ATPase 13A1	0	0	8	8	3	3	22	11	1.00	0	0	2	2	4	4		2	3	2	1	8	5
6844	NP_055047.2		VAMP2	vesicle associated membrane protein 2	0	0	11	6	1	4	22	7	0.75	0	0	0	0	0	0		0	6	0	0	6	2
5867	NP_004569.2		RAB4A	RAB4A, member RAS oncogene family	0	0	6	8	2	6	22	11	1.00	3	0	1	1	5	4		2	3	0	1	6	4
9482	NP_004844.1		STX8	syntaxin 8	0	0	7	9	3	3	22	12	1.00	0	0	0	0	0	0		2	0	1	0	3	2
51280	NP_057632.2		GOLM1	golgi membrane protein 1	1	0	4	8	5	5	22	15	1.00	0	0	0	0	0	0		0	0	1	0	1	1
23061	NP_942568.2		TBC1D9B	TBC1 domain family member 9B	2	1	6	7	3	5	21	13	0.87	8	3	8	6	25	15	0.90	7	15	7	6	35	15	0.97
2580	NP_005246.2		GAK	cyclin G associated kinase	0	0	10	7	1	3	21	8		8	7	6	2	23	11	1.00	14	10	5	2	31	13	1.00
1104	NP_001041664.1		RCC1	regulator of chromosome condensation 1	0	0	7	4	6	4	21	12	1.00	15	5	7	5	32	14	1.00	11	8	5	9	33	14	1.00
5170	NP_002604.1		PDPK1	3-phosphoinositide dependent protein kinase 1	0	0	7	4	5	5	21	9	1.00	7	6	5	0	18	9	0.75	10	10	5	6	31	14	1.00
92105	NP_291025.3		INTS4	integrator complex subunit 4	0	0	9	9	1	2	21	11		13	10	2	4	29	16	1.00	11	10	0	3	24	11
54497	NP_061897.1		HEATR5B	HEAT repeat containing 5B	0	0	9	0	6	6	21	9	0.75	4	2	4	3	13	7	0.99	9	15	3	2	29	16	1.00
57176	NP_065175.4		VARS2	valyl-tRNA synthetase 2, mitochondrial	2	0	9	6	4	2	21	12	0.79	13	5	4	6	28	13	0.92	5	9	7	4	25	15	0.92
11336	NP_009208.2		EXOC3	exocyst complex component 3	0	0	5	8	3	5	21	10	1.00	6	5	3	3	17	9	1.00	6	7	4	6	23	12	1.00
112970	NP_612426.1		KTI12	KTI12 chromatin associated homolog	0	0	9	5	3	4	21	9	1.00	6	5	4	3	18	9	1.00	10	7	4	0	21	10	0.75
55269	NP_001035879.1		PSPC1	paraspeckle component 1	1	0	8	3	6	4	21	12	1.00	6	4	6	4	20	11	1.00	4	4	7	4	19	11	1.00
25828	NP_036605.2		TXN2	thioredoxin 2	0	0	10	8	0	3	21	3		7	3	3	3	16	6	1.00	4	10	0	0	14	3
10425	NP_006312.1		ARIH2	ariadne RBR E3 ubiquitin protein ligase 2	0	0	9	5	5	2	21	11	1.00	12	8	9	7	36	17	1.00	6	5	5	0	16	6	0.75
50848	NP_058642.1		F11R	F11 receptor	1	0	6	6	5	4	21	6	1.00	4	3	3	3	13	4	1.00	4	3	4	4	15	5	1.00
29110	NP_037386.1		TBK1	TANK binding kinase 1	0	0	7	5	2	7	21	13	1.00	5	5	4	3	17	14	1.00	7	5	1	1	14	6
113675	NP_612441.1		SDSL	serine dehydratase like	0	0	8	9	2	2	21	11	0.99	3	2	0	0	5	4		6	2	2	0	10	4
51303	NP_001137254.1		FKBP11	FK506 binding protein 11	1	1	5	9	4	3	21	8	1.00	3	2	2	2	9	4	0.99	2	2	2	0	6	3
51599	NP_001247418.1		LSR	lipolysis stimulated lipoprotein receptor	0	0	7	8	3	3	21	10	1.00	5	1	1	2	9	6		2	2	1	1	6	4
1969	NP_004422.2		EPHA2	EPH receptor A2	1	0	4	5	6	6	21	11	1.00	3	1	3	1	8	6		1	1	1	1	4	4
9320	NP_004229.1		TRIP12	thyroid hormone receptor interactor 12	0	0	2	6	7	5	20	9	1.00	9	6	7	7	29	12	1.00	22	13	6	11	52	20	1.00
283489	NP_001157616.1		CHAMP1	chromosome alignment maintaining phosphoprotein 1	1	1	8	9	3	0	20	8		12	8	9	5	34	13	1.00	13	16	8	7	44	18	1.00
8563	NP_003669.4		THOC5	THO complex 5	0	0	11	7	1	1	20	14		8	4	1	3	16	10		24	12	4	3	43	19	1.00
55027	NP_891552.1		HEATR3	HEAT repeat containing 3	0	0	6	9	1	4	20	10	0.75	9	8	2	5	24	14	1.00	13	16	10	9	48	13	1.00
79654	NP_078878.3		HECTD3	HECT domain E3 ubiquitin protein ligase 3	1	0	3	6	6	5	20	12	1.00	0	5	8	3	16	9		18	13	8	6	45	18	1.00
9980	NP_005119.2		DOPEY2	dopey family member 2	1	1	6	8	2	4	20	9	1.00	4	7	3	3	17	12	1.00	10	12	8	6	36	20	1.00
728071	XP_001126758.1		FAM203B	HGH1 homolog	0	0	4	6	6	4	20	11	1.00	11	3	8	4	26	15	1.00	9	4	9	13	35	19	1.00
22929	NP_036379.2		SEPHS1	selenophosphate synthetase 1	0	0	6	5	4	5	20	8	1.00	2	2	6	2	12	7	0.99	12	10	4	3	29	9	1.00
472	NP_000042.3		ATM	ATM serine/threonine kinase	0	0	4	5	5	6	20	10	1.00	9	2	5	8	24	14	1.00	4	6	6	10	26	14	1.00
5889	NP_478123.1		RAD51C	RAD51 paralog C	0	0	5	4	3	8	20	8	1.00	7	3	5	6	21	6	1.00	10	5	4	7	26	8	1.00
4642	NP_056009.1		MYO1D	myosin ID	0	0	8	4	2	6	20	10	1.00	8	1	2	2	13	7		9	8	4	5	26	10	1.00
5499	NP_002699.1		PPP1CA	protein phosphatase 1 catalytic subunit alpha	2	1	6	5	4	5	20	8	0.90	7	4	6	7	24	8	0.93	6	5	6	6	23	8	0.94
288	NP_001191332.1		ANK3	ankyrin 3	0	0	7	5	4	4	20	13	1.00	0	2	3	0	5	4		4	7	5	7	23	12	1.00
9382	NP_061184.1		COG1	component of oligomeric golgi complex 1	0	0	5	4	5	6	20	14	1.00	12	6	8	6	32	19	1.00	8	6	3	6	23	14	1.00
23192	NP_847896.1		ATG4B	autophagy related 4B cysteine peptidase	0	0	5	7	3	5	20	12	1.00	4	8	4	5	21	11	1.00	8	8	5	1	22	9	0.75
116496	NP_443198.1		FAM129A	family with sequence similarity 129 member A	0	0	4	5	6	5	20	10	1.00	2	1	2	1	6	5		2	9	5	3	19	11	1.00
92935	NP_612404.1		MARS2	methionyl-tRNA synthetase 2, mitochondrial	1	1	3	5	5	7	20	8	1.00	7	5	5	4	21	11	1.00	6	5	2	5	18	5	1.00
253558	NP_872357.2		LCLAT1	lysocardiolipin acyltransferase 1	0	0	7	5	4	4	20	13	1.00	0	3	2	3	8	6		3	2	5	8	18	8	1.00
10434	NP_006321.1		LYPLA1	lysophospholipase I	0	0	6	7	4	3	20	5	1.00	6	5	5	3	19	8	1.00	5	3	4	2	14	4	0.99
51608	NP_057033.2		GET4	golgi to ER traffic protein 4	1	0	7	7	4	2	20	7	1.00	0	0	1	0	1	1		6	2	2	0	10	3
545	NP_001175.2		ATR	ATR serine/threonine kinase	2	0	5	6	3	6	20	12	0.87	3	5	3	3	14	9		2	4	1	2	9	6
161424	NP_777573.1		C14orf21	NOP9 nucleolar protein	0	0	8	6	3	3	20	8	1.00	0	1	0	0	1	1		2	2	2	1	7	4
64743	NP_060353.2		WDR13	WD repeat domain 13	0	0	4	5	6	5	20	9	1.00	2	0	0	3	5	4		3	4	0	0	7	5
5817	NP_006496.3		PVR	poliovirus receptor	0	0	8	5	2	5	20	10	1.00	0	0	0	2	2	1		0	0	2	2	4	2
84274	NP_115690.3		COQ5	coenzyme Q5, methyltransferase	0	0	7	4	5	4	20	10	1.00	3	3	3	0	9	8		0	0	1	2	3	3
89944	NP_612351.2		GLB1L2	galactosidase beta 1 like 2	0	0	10	5	2	3	20	7	1.00	0	1	1	2	4	4		0	0	2	0	2	2
54940	NP_001073308.1		OCIAD1	OCIA domain containing 1	2	0	7	8	3	2	20	7	0.76	0	2	2	0	4	2		0	0	0	0	0	0
26999	NP_001032409.2		CYFIP2	cytoplasmic FMR1 interacting protein 2	0	0	0	0	11	8	19	10		23	12	17	17	69	27	1.00	19	19	0	12	50	18	0.75
10567	NP_006414.2		RABAC1	Rab acceptor 1	0	0	6	2	7	5	20	6	1.00	0	0	0	0	0	0		0	0	0	0	0	0
5586	NP_006247.1		PKN2	protein kinase N2	0	0	4	6	4	5	19	16	1.00	12	9	4	7	32	19	1.00	25	31	6	4	66	30	1.00
5780	NP_002824.1		PTPN9	protein tyrosine phosphatase, non-receptor type 9	3	2	2	7	5	5	19	11		17	8	8	9	42	16	0.94	14	7	4	4	29	13
841	NP_001073593.1		CASP8	caspase 8	0	0	7	7	2	3	19	10	1.00	8	2	4	5	19	12	1.00	25	7	5	7	44	19	1.00
60561	NP_068749.3		RINT1	RAD50 interactor 1	0	0	6	0	6	7	19	9	0.75	9	6	7	9	31	14	1.00	7	8	7	10	32	12	1.00
29101	NP_054907.1		SSU72	SSU72 homolog, RNA polymerase II CTD phosphatase	0	0	7	5	3	4	19	12	1.00	10	6	6	4	26	10	1.00	8	7	6	7	28	12	1.00
1477	NP_001315.1		CSTF1	cleavage stimulation factor subunit 1	0	0	6	8	2	3	19	11	1.00	10	7	3	4	24	12	1.00	14	9	1	1	25	7
2109	NP_001976.1		ETFB	electron transfer flavoprotein beta subunit	0	0	3	5	5	6	19	9	1.00	5	6	2	6	19	11	1.00	9	4	5	5	23	12	1.00
115207	NP_612453.1		KCTD12	potassium channel tetramerization domain containing 12	0	0	10	5	4	0	19	6	0.75	1	3	0	3	7	5		4	3	9	6	22	9	1.00
6772	NP_009330.1		STAT1	signal transducer and activator of transcription 1	0	0	5	4	5	5	19	13	1.00	7	9	6	6	28	17	1.00	8	8	3	3	22	14	1.00
54623	NP_001243755.1		PAF1	PAF1 homolog, Paf1/RNA polymerase II complex component	1	0	4	7	4	4	19	10	1.00	2	1	2	0	5	3		10	5	0	6	21	8	0.75
25839	NP_056201.2		COG4	component of oligomeric golgi complex 4	0	0	0	5	5	9	19	11	0.75	7	4	3	4	18	10	1.00	10	4	3	0	17	8
51124	NP_057181.1		IER3IP1	immediate early response 3 interacting protein 1	2	0	6	6	2	5	19	6	0.80	0	2	1	2	5	3		4	5	2	2	13	6
8934	NP_001129134.1		RAB7L1	RAB29, member RAS oncogene family	0	0	6	7	2	4	19	8	1.00	5	0	2	3	10	6		0	0	5	4	9	4
10020	NP_001121699.1		GNE	glucosamine (UDP-N-acetyl)-2-epimerase/N-acetylmannosamine kinase	0	0	10	7	1	0	18	9		21	7	9	7	44	19	1.00	18	17	9	15	59	26	1.00
51062	NP_001121185.1		ATL1	atlastin GTPase 1	0	0	6	6	4	3	19	10	1.00	2	3	1	2	8	6		0	1	5	2	8	6
162427	NP_835227.1		FAM134C	reticulophagy regulator family member 3	0	0	5	6	6	2	19	8	1.00	1	0	0	0	1	1		3	1	0	0	4	2
51035	NP_056937.2		UBXN1	UBX domain protein 1	3	1	6	3	5	4	18	11		4	5	4	4	17	12		10	12	5	6	33	15	0.90
5335	NP_877963.1		PLCG1	phospholipase C gamma 1	0	0	2	6	4	6	18	8	1.00	7	2	5	5	19	14	1.00	9	12	6	7	34	12	1.00
79665	NP_078888.4		DHX40	DEAH-box helicase 40	2	1	4	5	6	3	18	8	0.84	10	5	6	6	27	8	0.95	10	8	5	10	33	7	0.97
25793	NP_001244919.1		FBXO7	F-box protein 7	0	0	5	7	3	3	18	8	1.00	10	6	1	3	20	7		4	8	4	4	20	6	1.00
114971	NP_783859.1		PTPMT1	protein tyrosine phosphatase, mitochondrial 1	0	0	6	5	5	2	18	5	1.00	0	1	5	6	12	5		3	8	4	4	19	7	1.00
8480	NP_003601.1		RAE1	ribonucleic acid export 1	1	1	10	2	2	4	18	7	0.99	7	1	5	5	18	7	0.75	3	4	5	5	17	8	1.00
5531	NP_002711.1		PPP4C	protein phosphatase 4 catalytic subunit	1	0	5	7	2	4	18	8	1.00	4	8	0	0	12	5		7	3	4	1	15	9
1635	NP_001912.2		DCTD	dCMP deaminase	1	0	5	4	5	4	18	7	1.00	7	3	8	7	25	11	1.00	4	4	4	2	14	7	1.00
23190	NP_055422.1		UBXN4	UBX domain protein 4	0	0	3	7	3	5	18	6	1.00	4	2	2	3	11	4	0.99	3	6	0	4	13	4
51530	NP_057562.3		ZC3HC1	zinc finger C3HC-type containing 1	0	0	6	7	2	3	18	6	1.00	0	2	4	0	6	2		3	8	0	2	13	5
8675	NP_001128244.1		STX16	syntaxin 16	0	0	3	10	2	3	18	7	0.99	3	2	1	2	8	5		4	0	4	2	10	5
23603	NP_055140.1		CORO1C	coronin 1C	0	0	5	4	6	3	18	9	1.00	8	9	4	2	23	11	1.00	6	2	0	1	9	5
4763	NP_001035957.1		NF1	neurofibromin 1	0	0	7	5	2	3	17	10	1.00	7	4	8	6	25	17	1.00	28	22	22	16	88	42	1.00
23310	NP_056076.1		NCAPD3	non-SMC condensin II complex subunit D3	0	0	7	6	2	2	17	9	0.99	7	3	0	4	14	10		21	14	7	1	43	14	0.75
51780	NP_057688.2		KDM3B	lysine demethylase 3B	0	0	4	5	5	3	17	9	1.00	4	3	4	4	15	9	1.00	13	5	4	7	29	13	1.00
701	NP_001202.4		BUB1B	BUB1 mitotic checkpoint serine/threonine kinase B	2	0	4	5	5	3	17	13	0.83	8	3	6	5	22	10	0.88	8	10	4	3	25	11	0.87
26086	NP_001139110.1		GPSM1	G protein signaling modulator 1	2	0	3	4	4	6	17	12	0.82	5	4	8	7	24	17	0.92	5	8	4	7	24	14	0.92
6917	NP_006747.1		TCEA1	transcription elongation factor A1	2	0	6	3	4	4	17	9	0.82	1	3	5	5	14	9		7	5	5	7	24	11	0.94
55763	NP_839955.1		EXOC1	exocyst complex component 1	0	0	4	6	2	5	17	9	1.00	2	2	5	5	14	9	0.99	6	6	8	3	23	14	1.00
29926	NP_037467.2		GMPPA	GDP-mannose pyrophosphorylase A	0	0	2	6	4	5	17	10	1.00	8	3	6	8	25	10	1.00	5	5	9	4	23	12	1.00
10427	NP_006314.2		SEC24B	SEC24 homolog B, COPII coat complex component	0	0	4	6	2	5	17	8	1.00	12	0	4	3	19	10		4	7	5	6	22	13	1.00
28964	NP_001078923.1		GIT1	GIT ArfGAP 1	0	0	7	2	3	5	17	9	1.00	6	3	0	0	9	4		8	5	3	4	20	9	1.00
8815	NP_001137457.1		BANF1	barrier to autointegration factor 1	0	0	5	4	4	4	17	6	1.00	8	5	10	5	28	7	1.00	7	6	2	2	17	5	0.99
10741	NP_006597.2		RBBP9	RB binding protein 9, serine hydrolase	0	0	6	3	5	3	17	8	1.00	3	1	2	3	9	8		4	3	3	6	16	8	1.00
9354	NP_001191006.1		UBE4A	ubiquitination factor E4A	0	0	5	4	2	6	17	13	1.00	5	3	2	1	11	8		6	3	4	2	15	10	0.99
58528	NP_067067.1		RRAGD	Ras related GTP binding D	0	0	5	5	3	4	17	9	1.00	5	3	1	4	13	8		3	3	5	3	14	6	1.00
65264	NP_075567.2		UBE2Z	ubiquitin conjugating enzyme E2 Z	0	0	5	6	3	3	17	9	1.00	3	1	2	2	8	8		7	4	0	2	13	5
5580	NP_006245.2		PRKCD	protein kinase C delta	0	0	7	0	5	5	17	10	0.75	4	4	3	0	11	8		5	2	3	2	12	10	0.99
4124	NP_002363.2		MAN2A1	mannosidase alpha class 2A member 1	0	0	8	3	3	3	17	9	1.00	2	0	3	0	5	2		4	0	2	4	10	5
3052	NP_005324.3		HCCS	holocytochrome c synthase	0	0	4	9	2	2	17	8	0.99	0	0	1	0	1	1		2	0	0	0	2	1
3685	NP_001138471.1		ITGAV	integrin subunit alpha V	0	0	4	5	2	6	17	8	1.00	0	0	0	1	1	1		1	0	0	0	1	1
27436	NP_061936.2		EML4	echinoderm microtubule associated protein like 4	1	0	8	5	0	3	16	9		12	2	2	2	18	12	0.99	11	11	6	8	36	19	1.00
1479	NP_001317.1		CSTF3	cleavage stimulation factor subunit 3	0	0	7	7	1	1	16	9		11	3	3	1	18	8		8	9	3	7	27	14	1.00
27304	NP_055299.1		MOCS3	molybdenum cofactor synthesis 3	0	0	2	9	1	4	16	9		7	2	5	3	17	9	1.00	8	11	4	2	25	10	1.00
23318	NP_056084.1		ZCCHC11	zinc finger CCHC-type containing 11	0	0	6	10	0	0	16	6		7	8	6	1	22	10	0.75	7	12	1	5	25	9	0.75
255520	NP_714913.1		ELMOD2	ELMO domain containing 2	0	0	4	7	3	3	17	9	1.00	0	0	0	0	0	0		0	0	0	0	0	0
2026	NP_001966.1		ENO2	enolase 2	0	0	5	9	2	0	16	6		8	8	2	8	26	12	1.00	10	11	0	0	21	5
221960	NP_932765.1		CCZ1B	CCZ1 homolog B, vacuolar protein trafficking and biogenesis associated	0	0	3	7	1	5	16	9		5	1	4	5	15	9	0.75	6	7	2	4	19	10	1.00
5165	NP_001135858.1		PDK3	pyruvate dehydrogenase kinase 3	0	0	7	6	1	2	16	9		4	2	4	2	12	8	0.99	3	5	3	3	14	5	1.00
2983	NP_000848.1		GUCY1B3	guanylate cyclase 1 soluble subunit beta	0	0	4	3	5	4	16	10	1.00	4	2	6	4	16	9	1.00	7	4	6	7	24	12	1.00
2710	NP_001121599.1		GK	glycerol kinase	3	0	7	8	0	1	16	6		10	3	7	9	29	17	0.80	3	2	4	4	13	7
7915	NP_733936.1		ALDH5A1	aldehyde dehydrogenase 5 family member A1	0	0	5	5	3	3	16	6	1.00	8	3	3	2	16	8	0.99	5	4	2	2	13	5	0.99
91949	NP_705831.1		COG7	component of oligomeric golgi complex 7	0	0	2	3	5	6	16	16	1.00	0	1	0	0	1	1		3	0	3	2	8	6
1947	NP_004420.1		EFNB1	ephrin B1	0	0	7	3	3	3	16	8	1.00	2	2	4	0	8	6		2	2	3	1	8	6
60559	NP_068747.1		SPCS3	signal peptidase complex subunit 3	1	1	4	6	4	2	16	8	1.00	0	0	2	2	4	2		3	0	2	1	6	3
29929	NP_037471.2		ALG6	ALG6, alpha-1,3-glucosyltransferase	0	0	3	6	2	5	16	6	1.00	0	1	2	2	5	3		0	0	3	2	5	2
56996	NP_064631.2		SLC12A9	solute carrier family 12 member 9	0	0	4	7	2	3	16	10	0.99	4	0	0	0	4	2		0	2	0	0	2	1
10554	NP_116130.2		AGPAT1	1-acylglycerol-3-phosphate O-acyltransferase 1	0	0	3	8	3	2	16	10	0.99	2	0	0	1	3	2		1	0	0	0	1	1
79934	NP_079152.3		ADCK4	coenzyme Q8B	2	0	4	0	4	7	15	7		0	7	8	6	21	8		12	9	9	8	38	12	0.99
375056	NP_940953.2		MIA3	MIA family member 3, ER export factor	0	0	2	5	6	3	16	10	1.00	0	0	0	0	0	0		0	0	0	0	0	0
30849	NP_055417.1		PIK3R4	phosphoinositide-3-kinase regulatory subunit 4	0	0	4	9	1	1	15	9		6	5	4	4	19	13	1.00	13	10	4	7	34	19	1.00
79631	NP_001035700.1		EFTUD1	elongation factor like GTPase 1	1	1	4	4	2	5	15	9	1.00	13	5	6	8	32	14	1.00	14	7	6	8	35	14	1.00
9847	NP_055617.1		KIAA0528	C2 calcium dependent domain containing 5	0	0	4	5	0	6	15	8	0.75	9	6	3	4	22	14	1.00	5	14	8	5	32	14	1.00
51592	NP_056990.3		TRIM33	tripartite motif containing 33	1	0	5	8	0	2	15	5		11	6	8	7	32	16	1.00	13	7	6	6	32	11	1.00
874	NP_001227.1		CBR3	carbonyl reductase 3	0	0	2	2	5	6	15	9	0.99	9	2	5	4	20	11	1.00	14	9	4	5	32	14	1.00
57617	NP_065908.1		VPS18	VPS18, CORVET/HOPS core subunit	0	0	6	2	2	5	15	7	0.99	2	4	0	1	7	4		4	13	5	3	25	10	1.00
54881	NP_060216.2		TEX10	testis expressed 10	0	0	0	0	5	10	15	10		1	1	2	3	7	6		4	2	11	6	23	12	1.00
8458	NP_003585.3		TTF2	transcription termination factor 2	0	0	0	8	4	3	15	6		5	4	3	2	14	9	0.99	8	7	3	4	22	10	1.00
23376	NP_056138.1		UFL1	UFM1 specific ligase 1	0	0	3	6	2	4	15	11	0.99	8	5	3	5	21	9	1.00	10	4	5	5	24	15	1.00
11112	NP_689953.1		HIBADH	3-hydroxyisobutyrate dehydrogenase	0	0	4	3	5	3	15	7	1.00	7	3	4	3	17	9	1.00	7	4	3	3	17	6	1.00
6293	NP_072047.4		VPS52	VPS52, GARP complex subunit	0	0	3	5	4	3	15	10	1.00	3	0	3	3	9	6		5	4	4	3	16	11	1.00
23637	NP_036329.3		RABGAP1	RAB GTPase activating protein 1	0	0	2	6	3	4	15	10	0.99	5	2	2	3	12	6	0.99	6	4	3	2	15	7	0.99
5571	NP_001193638.1		PRKAG1	protein kinase AMP-activated non-catalytic subunit gamma 1	1	0	7	0	3	5	15	8		6	0	4	4	14	7	0.75	4	3	2	6	15	10	0.99
84164	NP_115580.2		ASCC2	activating signal cointegrator 1 complex subunit 2	0	0	3	3	5	4	15	7	1.00	0	0	3	2	5	3		4	4	3	4	15	9	1.00
23576	NP_036269.1		DDAH1	dimethylarginine dimethylaminohydrolase 1	0	0	3	3	3	6	15	12	1.00	4	2	1	2	9	8		4	5	1	3	13	7
57465	NP_001186036.1		TBC1D24	TBC1 domain family member 24	0	0	4	3	4	4	15	8	1.00	0	0	4	6	10	5		4	0	5	3	12	8
115290	NP_079183.4		FBXO17	F-box protein 17	0	0	3	6	3	3	15	7	1.00	2	2	1	2	7	4		4	2	3	2	11	5	0.99
51097	NP_057086.2		SCCPDH	saccharopine dehydrogenase (putative)	0	0	5	4	4	2	15	11	1.00	0	0	0	0	0	0		3	4	0	0	7	4
374383	NP_001189368.1		B7H6	0	0	0	8	2	3	2	15	7	0.99	0	0	0	2	2	2		2	0	2	1	5	4
8140	NP_003477.4		SLC7A5	solute carrier family 7 member 5	0	0	4	6	2	3	15	8	0.99	0	1	2	0	3	2		0	3	0	0	3	2
2589	NP_065207.2		GALNT1	polypeptide N-acetylgalactosaminyltransferase 1	0	0	2	4	5	4	15	10	1.00	0	0	1	0	1	1		2	0	0	1	3	2
57552	NP_001139748.1		NCEH1	neutral cholesterol ester hydrolase 1	0	0	4	4	3	4	15	9	1.00	0	0	0	0	0	0		2	0	0	1	3	2
50813	NP_001157567.1		COPS7A	COP9 signalosome subunit 7A	1	0	4	8	1	1	14	7		4	7	1	2	14	10		16	13	5	1	35	11	0.75
4087	NP_001129409.1		SMAD2	SMAD family member 2	0	0	0	0	5	9	14	6		11	0	2	0	13	3		11	12	0	10	33	9	0.75
1809	NP_001184223.1		DPYSL3	dihydropyrimidinase like 3	0	0	6	6	0	2	14	7		0	3	5	5	13	9		9	3	4	5	21	13	1.00
57506	NP_001193420.1		MAVS	mitochondrial antiviral signaling protein	1	1	7	4	2	1	14	7		0	2	2	2	6	5		6	6	3	5	20	8	1.00
51075	NP_001137484.1		TMX2	thioredoxin related transmembrane protein 2	0	0	5	5	4	1	15	7	0.75	0	0	0	0	0	0		0	1	0	0	1	1
7353	NP_001030324.2		UFD1L	ubiquitin recognition factor in ER associated degradation 1	0	0	3	6	3	2	14	8	0.99	3	1	3	2	9	7		4	4	6	5	19	12	1.00
55201	NP_060644.4		MAP1S	microtubule associated protein 1S	1	0	4	6	2	2	14	8	0.99	7	5	3	2	17	13	1.00	3	6	4	5	18	12	1.00
348995	NP_942590.1		NUP43	nucleoporin 43	0	0	6	4	1	3	14	8		2	0	2	2	6	5		3	5	6	2	16	9	1.00
55324	NP_060828.2		ABCF3	ATP binding cassette subfamily F member 3	0	0	5	4	1	4	14	10	0.75	9	4	1	0	14	7		7	6	0	3	16	8
5425	NP_001120690.1		POLD2	DNA polymerase delta 2, accessory subunit	0	0	4	2	4	4	14	9	1.00	6	5	3	5	19	12	1.00	5	5	3	2	15	9	0.99
54491	NP_061891.1		FAM105A	family with sequence similarity 105 member A	0	0	4	1	4	5	14	8	0.75	6	2	2	3	13	10	0.99	6	3	3	2	14	10	0.99
5290	NP_006209.2		PIK3CA	phosphatidylinositol-4,5-bisphosphate 3-kinase catalytic subunit alpha	0	0	4	5	2	3	14	9	0.99	3	3	6	4	16	13	1.00	5	4	4	1	14	9	0.75
11321	NP_009197.2		GPN1	GPN-loop GTPase 1	0	0	3	7	2	2	14	5	0.99	4	1	0	0	5	3		6	5	0	1	12	6
284273	NP_787103.1		ZADH2	zinc binding alcohol dehydrogenase domain containing 2	0	0	4	2	3	5	14	7	0.99	1	1	1	3	6	5		2	5	3	2	12	7	0.99
3612	NP_001138350.1		IMPA1	inositol monophosphatase 1	0	0	3	5	3	3	14	10	1.00	6	1	4	3	14	9		3	3	2	3	11	10	0.99
153364	NP_981951.1		MBLAC2	metallo-beta-lactamase domain containing 2	0	0	3	4	5	2	14	10	0.99	0	1	2	2	5	4		2	1	6	1	10	6
1892	NP_004083.3		ECHS1	enoyl-CoA hydratase, short chain 1	0	0	2	4	3	5	14	6	0.99	0	4	3	0	7	2		4	0	2	1	7	4
8673	NP_003752.2		VAMP8	vesicle associated membrane protein 8	0	0	4	6	2	2	14	7	0.99	0	0	0	0	0	0		1	0	1	3	5	4
7905	NP_005660.4		REEP5	receptor accessory protein 5	0	0	5	4	1	4	14	7	0.75	0	2	0	0	2	2		0	0	2	2	4	4
1605	NP_004384.4		DAG1	dystroglycan 1	0	0	5	4	3	2	14	6	0.99	0	0	0	0	0	0		2	0	1	1	4	3
79135	NP_077027.1		APOO	apolipoprotein O	0	0	4	3	4	3	14	8	1.00	2	0	1	4	7	4		0	0	0	3	3	2
5912	NP_002877.2		RAP2B	RAP2B, member of RAS oncogene family	0	0	4	2	4	4	14	5	1.00	0	0	0	0	0	0		2	0	0	0	2	1
4705	NP_004535.1		NDUFA10	NADH:ubiquinone oxidoreductase subunit A10	5	2	3	10	0	0	13	4		13	8	12	10	43	24	0.75	10	9	8	5	32	15
29919	NP_037458.3		C18orf8	chromosome 18 open reading frame 8	0	0	4	3	1	5	13	7		8	4	5	4	21	11	1.00	6	5	6	6	23	12	1.00
56270	NP_062559.2		WDR45L	WD repeat domain 45B	0	0	5	2	5	1	13	7		9	5	4	2	20	7	1.00	5	6	4	5	20	8	1.00
84064	NP_115500.1		HDHD2	haloacid dehalogenase like hydrolase domain containing 2	0	0	2	8	3	0	13	5		1	1	0	1	3	3		8	2	4	5	19	8	1.00
444	NP_004309.2		ASPH	aspartate beta-hydroxylase	1	1	4	7	0	2	13	5		7	1	2	0	10	4		4	8	4	2	18	6	1.00
55100	NP_060504.1		WDR70	WD repeat domain 70	1	1	4	4	3	2	13	10	0.99	4	0	3	3	10	6		11	11	5	9	36	16	1.00
5255	NP_002628.2		PHKA1	phosphorylase kinase regulatory subunit alpha 1	1	0	0	6	4	3	13	8		5	5	4	4	18	13	1.00	3	3	7	2	15	11	0.99
11266	NP_009171.1		DUSP12	dual specificity phosphatase 12	1	0	6	1	3	3	13	8		1	3	6	5	15	9		4	4	3	3	14	7	1.00
5875	NP_878256.1		RABGGTA	Rab geranylgeranyltransferase alpha subunit	0	0	3	4	4	2	13	11	0.99	7	6	5	4	22	17	1.00	2	7	5	2	16	10	0.99
23141	NP_055929.1		ANKLE2	ankyrin repeat and LEM domain containing 2	0	0	4	6	0	3	13	8		0	4	5	5	14	11	0.75	5	3	3	1	12	11
54914	NP_060264.3		KIAA1797	focadhesin	0	0	4	0	5	4	13	7	0.75	9	1	0	2	12	8		0	1	4	8	13	7
26145	NP_056464.1		IRF2BP1	interferon regulatory factor 2 binding protein 1	0	0	2	5	2	4	13	5	0.99	6	2	2	2	12	4	0.99	4	2	3	2	11	4	0.99
55011	NP_060386.1		PIH1D1	PIH1 domain containing 1	1	1	3	4	2	4	13	5	0.99	5	2	2	2	11	5	0.99	4	0	2	3	9	5
51715	NP_057361.3		RAB23	RAB23, member RAS oncogene family	0	0	3	3	3	4	13	7	1.00	4	0	3	3	10	5		5	0	2	2	9	7
2581	NP_001188331.1		GALC	galactosylceramidase	0	0	2	3	4	4	13	8	0.99	0	0	0	0	0	0		0	4	0	2	6	4
928	NP_001760.1		CD9	CD9 molecule	0	0	6	2	2	3	13	5	0.99	2	1	1	1	5	4		2	0	2	1	5	3
51699	NP_476528.1		VPS29	VPS29, retromer complex component	0	0	0	4	4	5	13	5	0.75	0	1	2	0	3	2		0	0	4	0	4	2
8452	NP_001244126.1		CUL3	cullin 3	1	0	5	0	4	3	12	7		7	5	3	3	18	13	1.00	17	14	6	5	42	18	1.00
57181	NP_001120729.1		SLC39A10	solute carrier family 39 member 10	1	0	3	4	3	3	13	8	1.00	0	0	1	2	3	3		0	0	0	1	1	1
79657	NP_078880.2		RPAP3	RNA polymerase II associated protein 3	1	0	2	3	4	3	12	9	0.99	3	3	2	2	10	8	0.99	7	12	5	6	30	17	1.00
56897	NP_064520.2		WRNIP1	Werner helicase interacting protein 1	0	0	4	0	6	2	12	8		5	3	4	3	15	9	1.00	6	7	8	7	28	10	1.00
27183	NP_037377.1		VPS4A	vacuolar protein sorting 4 homolog A	0	0	4	0	3	5	12	7		7	6	0	6	19	10	0.75	3	9	7	5	24	10	1.00
8723	NP_003785.1		SNX4	sorting nexin 4	0	0	7	4	1	0	12	5		10	5	2	2	19	7	0.99	9	10	1	2	22	8
80153	NP_079359.2		EDC3	enhancer of mRNA decapping 3	0	0	4	2	4	2	12	6	0.99	3	2	4	3	12	8	0.99	13	9	4	2	28	12	1.00
9882	NP_055647.2		TBC1D4	TBC1 domain family member 4	0	0	4	3	1	4	12	5		0	3	3	0	6	2		5	5	7	0	17	6	0.75
83642	NP_113642.1		SELO	selenoprotein O	0	0	3	6	2	1	12	5		5	5	2	2	14	5	0.99	6	3	5	3	17	6	1.00
7249	NP_001070651.1		TSC2	tuberous sclerosis 2	0	0	3	4	2	3	12	8	0.99	6	6	6	4	22	12	1.00	12	9	0	0	21	9
84313	NP_115729.1		VPS25	vacuolar protein sorting 25 homolog	0	0	6	6	0	0	12	5		3	3	3	3	12	9	1.00	6	5	2	3	16	6	1.00
56916	NP_001121901.1		SMARCAD1	SWI/SNF-related, matrix-associated actin-dependent regulator of chromatin, subfamily a, containing DEAD/H box 1	0	0	5	4	3	0	12	8		0	2	2	0	4	3		0	5	5	5	15	8	0.75
55154	NP_001243461.1		MSTO1	misato 1, mitochondrial distribution and morphology regulator	0	0	7	3	1	1	12	7		0	0	4	4	8	6		4	5	3	3	15	8	1.00
80789	NP_085131.1		INTS5	integrator complex subunit 5	0	0	0	7	2	3	12	3		9	9	4	4	26	9	1.00	6	5	0	2	13	8
57700	NP_065991.3		FAM160B1	family with sequence similarity 160 member B1	0	0	2	4	3	3	12	8	0.99	0	2	0	0	2	2		2	4	3	4	13	8	0.99
10651	NP_006545.1		MTX2	metaxin 2	0	0	2	4	4	2	12	6	0.99	7	1	0	3	11	5		8	0	0	4	12	2
54700	NP_060897.3		RRN3	RRN3 homolog, RNA polymerase I transcription factor	0	0	6	2	2	2	12	7	0.99	3	3	3	2	11	9	0.99	4	3	2	2	11	7	0.99
79613	NP_078838.1		TMCO7	transport and golgi organization 6 homolog	0	0	5	4	1	2	12	7		0	1	1	0	2	2		3	2	2	2	9	5	0.99
6241	NP_001159403.1		RRM2	ribonucleotide reductase regulatory subunit M2	0	0	3	4	2	3	12	9	0.99	3	2	1	0	6	5		2	1	0	1	4	3
3655	NP_001073286.1		ITGA6	integrin subunit alpha 6	0	0	4	3	3	2	12	7	0.99	0	0	0	0	0	0		2	0	0	2	4	3
976	NP_001775.2		CD97	adhesion G protein-coupled receptor E5	0	0	4	2	4	2	12	7	0.99	0	0	0	0	0	0		2	0	0	0	2	1
4121	NP_005898.2		MAN1A1	mannosidase alpha class 1A member 1	1	0	4	3	2	3	12	8	0.99	0	0	0	3	3	3		0	0	2	0	2	2
8805	NP_003843.3		TRIM24	tripartite motif containing 24	0	0	3	3	3	2	11	7	0.99	10	8	7	6	31	18	1.00	16	13	7	10	46	20	1.00
10767	NP_001138630.1		HBS1L	HBS1 like translational GTPase	3	2	4	6	1	0	11	7		8	5	4	1	18	14		14	14	10	4	42	20	0.76
3980	NP_039269.2		LIG3	DNA ligase 3	0	0	3	2	3	3	11	7	0.99	1	2	2	5	10	7		11	7	7	9	34	13	1.00
91754	NP_149107.4		NEK9	NIMA related kinase 9	0	0	5	5	1	0	11	6		11	8	9	7	35	20	1.00	4	7	9	9	29	14	1.00
113251	NP_443111.4		LARP4	La ribonucleoprotein domain family member 4	1	0	4	5	1	1	11	4		2	1	1	2	6	4		6	7	5	5	23	7	1.00
2975	NP_001511.2		GTF3C1	general transcription factor IIIC subunit 1	1	0	0	11	0	0	11	3		12	6	0	0	18	5		10	5	0	7	22	9	0.75
2617	NP_002038.2		GARS	glycyl-tRNA synthetase	0	0	7	0	1	3	11	6		2	3	3	2	10	8	0.99	8	4	5	5	22	10	1.00
8021	NP_005076.3		NUP214	nucleoporin 214	0	0	4	3	3	1	11	8		9	2	2	2	15	10	0.99	8	7	3	3	21	11	1.00
4927	NP_002523.2		NUP88	nucleoporin 88	0	0	6	2	1	2	11	6		5	1	1	1	8	5		5	8	2	3	18	7	1.00
9477	NP_004266.2		MED20	mediator complex subunit 20	0	0	2	4	3	2	11	5	0.99	2	0	3	4	9	4		4	3	6	4	17	6	1.00
51251	NP_001002010.1		NT5C3	5'-nucleotidase, cytosolic IIIA	1	0	0	4	3	4	11	7		4	1	4	2	11	7		8	2	4	3	17	10	0.99
54936	NP_060295.1		ADPRHL2	ADP-ribosylhydrolase like 2	0	0	5	2	3	1	11	8		7	2	2	2	13	8	0.99	3	6	5	2	16	11	1.00
56254	NP_062538.5		RNF20	ring finger protein 20	0	0	2	0	3	6	11	7		2	0	5	3	10	7		0	6	5	5	16	10	0.75
11020	NP_001171172.1		IFT27	intraflagellar transport 27	0	0	3	2	3	3	11	6	0.99	3	3	0	0	6	4		4	8	2	1	15	8
55500	NP_061108.2		ETNK1	ethanolamine kinase 1	1	0	5	4	0	2	11	5		8	2	2	3	15	5	0.99	2	5	0	2	9	4
5536	NP_001191213.1		PPP5C	protein phosphatase 5 catalytic subunit	0	0	2	5	2	2	11	7	0.99	0	1	0	0	1	1		2	2	2	2	8	4	0.98
868	NP_733762.2		CBLB	Cbl proto-oncogene B	0	0	8	3	0	0	11	3		2	4	6	2	14	5	0.99	6	0	1	1	8	3
23464	NP_001165161.1		GCAT	glycine C-acetyltransferase	0	0	3	4	2	2	11	8	0.99	2	4	0	2	8	6		2	2	0	0	4	2
5378	NP_001121615.1		PMS1	PMS1 homolog 1, mismatch repair system component	0	0	4	2	2	3	11	9	0.99	0	0	3	3	6	6		0	0	3	1	4	4
102	NP_001101.1		ADAM10	ADAM metallopeptidase domain 10	1	0	2	4	2	3	11	7	0.99	0	0	0	0	0	0		0	0	0	1	1	1
9088	NP_872629.1		PKMYT1	protein kinase, membrane associated tyrosine/threonine 1	0	0	2	2	3	4	11	5	0.99	0	0	1	0	1	1		0	0	1	0	1	1
3927	NP_006139.1		LASP1	LIM and SH3 protein 1	1	1	3	2	3	2	10	5	0.99	0	2	2	1	5	3		4	5	2	1	12	6
5924	NP_008840.1		RASGRF2	Ras protein specific guanine nucleotide releasing factor 2	0	0	4	5	1	0	10	5		5	2	0	0	7	4		9	11	5	3	28	11	1.00
10025	NP_005472.2		MED16	mediator complex subunit 16	0	0	4	5	0	1	10	4		4	2	0	1	7	5		7	9	4	3	23	11	1.00
4090	NP_005894.3		SMAD5	SMAD family member 5	0	0	2	3	2	3	10	7	0.99	8	4	4	5	21	6	1.00	9	5	2	2	18	7	0.99
51122	NP_057178.2		COMMD2	COMM domain containing 2	0	0	4	6	0	0	10	5		4	4	3	0	11	5		5	6	3	4	18	6	1.00
56931	NP_064560.2		DUS3L	dihydrouridine synthase 3 like	0	0	4	4	2	0	10	5		4	4	3	2	13	10	0.99	6	2	6	4	18	10	1.00
60526	NP_068744.1		C2orf43	lipid droplet associated hydrolase	0	0	3	0	3	4	10	3		2	2	5	4	13	4	0.99	6	4	4	0	14	5	0.75
84267	NP_115683.3		C9orf64	chromosome 9 open reading frame 64	0	0	5	3	2	0	10	6		8	5	0	4	17	10	0.75	5	0	4	3	12	9
8874	NP_001106985.1		ARHGEF7	Rho guanine nucleotide exchange factor 7	0	0	5	2	0	3	10	5		4	5	4	2	15	10	1.00	4	2	2	3	11	7	0.99
55847	NP_060934.1		CISD1	CDGSH iron sulfur domain 1	1	1	3	3	2	2	10	6	0.99	2	1	1	1	5	4		2	2	1	1	6	4
8487	NP_003607.1		GEMIN2	gem nuclear organelle associated protein 2	0	0	4	2	2	2	10	5	0.99	0	0	0	0	0	0		1	2	0	1	4	3
64222	NP_071766.2		TOR3A	torsin family 3 member A	1	0	2	4	2	2	10	6	0.99	0	0	0	0	0	0		0	0	0	0	0	0
5976	NP_002902.2		UPF1	UPF1, RNA helicase and ATPase	3	2	5	4	0	0	9	4		5	8	4	5	22	12		9	9	9	12	39	16	0.97
1819	NP_001379.1		DRG2	developmentally regulated GTP binding protein 2	0	0	5	0	2	2	9	6		6	5	6	2	19	9	1.00	10	13	8	5	36	14	1.00
55756	NP_060720.2		INTS9	integrator complex subunit 9	0	0	0	2	3	4	9	5		5	4	0	3	12	8		6	8	6	9	29	7	1.00
9716	NP_055506.1		AQR	aquarius intron-binding spliceosomal factor	0	0	9	0	0	0	9	4		6	2	5	2	15	10	0.99	11	8	1	3	23	14
9474	NP_004840.1		ATG5	autophagy related 5	0	0	3	3	0	3	9	5		8	2	1	5	16	8		4	8	4	4	20	12	1.00
283373	NP_775866.2		ANKRD52	ankyrin repeat domain 52	1	1	3	2	2	2	9	7	0.99	0	2	2	3	7	4		7	4	4	4	19	11	1.00
25926	NP_056277.2		NOL11	nucleolar protein 11	0	0	0	0	4	5	9	5		5	2	3	4	14	7	0.99	3	5	3	5	16	7	1.00
121441	NP_001128647.1		NEDD1	neural precursor cell expressed, developmentally down-regulated 1	0	0	5	0	2	2	9	4		2	0	3	3	8	6		5	5	4	2	16	8	1.00
54973	NP_060341.2		CPSF3L	integrator complex subunit 11	0	0	6	2	1	0	9	4		8	4	4	2	18	10	1.00	4	6	1	3	14	5
3417	NP_005887.2		IDH1	isocitrate dehydrogenase (NADP(+)) 1, cytosolic	0	0	4	3	2	0	9	5		9	7	2	4	22	11	1.00	5	4	4	0	13	7	0.75
10762	NP_705931.1		NUP50	nucleoporin 50	0	0	4	3	2	0	9	6		6	4	3	4	17	11	1.00	3	2	5	3	13	9	0.99
58490	NP_067038.1		RPRD1B	regulation of nuclear pre-mRNA domain containing 1B	0	0	4	2	1	2	9	5		2	0	0	0	2	1		2	2	5	3	12	6	0.99
6301	NP_006504.2		SARS	seryl-tRNA synthetase	0	0	3	2	3	1	9	6		0	4	1	3	8	5		3	5	2	2	12	8	0.99
10160	NP_005757.1		FARP1	FERM, ARH/RhoGEF and pleckstrin domain protein 1	0	0	2	4	1	2	9	4		0	4	1	2	7	5		2	2	3	3	10	5	0.99
5500	NP_002700.1		PPP1CB	protein phosphatase 1 catalytic subunit beta	1	0	2	3	2	2	9	7	0.99	3	2	3	2	10	6	0.99	3	3	3	1	10	6
55245	NP_955781.2		UQCC	ubiquinol-cytochrome c reductase complex assembly factor 1	0	0	3	2	2	2	9	5	0.99	2	1	2	6	11	6		1	2	3	4	10	5
51504	NP_057488.1		TRMT112	tRNA methyltransferase subunit 11-2	1	1	2	4	2	1	9	5		10	1	0	1	12	5		2	3	2	2	9	7	0.99
9590	NP_005091.2		AKAP12	A-kinase anchoring protein 12	1	0	2	3	2	2	9	5	0.99	9	0	1	2	12	7		4	0	2	0	6	5
875	NP_001171479.1		CBS	cystathionine-beta-synthase	0	0	3	2	2	2	9	6	0.99	5	2	2	3	12	7	0.99	2	0	1	1	4	3
6470	NP_004160.3		SHMT1	serine hydroxymethyltransferase 1	0	0	0	6	0	2	8	4		19	11	2	2	34	12	0.99	17	16	2	0	35	7
23063	NP_055860.1		WAPAL	WAPL cohesin release factor	1	1	4	2	0	2	8	5		8	3	2	3	16	10	0.99	13	9	3	6	31	12	1.00
10489	NP_006360.3		LRRC41	leucine rich repeat containing 41	0	0	4	2	2	0	8	4		3	2	5	2	12	6	0.99	10	6	5	2	23	12	1.00
7272	NP_003309.2		TTK	TTK protein kinase	2	1	0	2	3	3	8	4		5	3	6	4	18	5	0.84	6	3	8	4	21	9	0.86
56904	NP_064530.1		SH3GLB2	SH3 domain containing GRB2 like, endophilin B2	0	0	3	2	2	1	8	6		4	1	1	0	6	3		5	8	0	5	18	7	0.75
6813	NP_008880.2		STXBP2	syntaxin binding protein 2	0	0	2	3	2	1	8	7		4	2	2	3	11	7	0.99	8	3	3	4	18	11	1.00
51517	NP_909119.1		NCKIPSD	NCK interacting protein with SH3 domain	0	0	4	0	2	2	8	4		0	1	4	3	8	5		4	5	4	1	14	6	0.75
4329	NP_005580.1		ALDH6A1	aldehyde dehydrogenase 6 family member A1	0	0	2	3	2	1	8	5		6	5	2	2	15	10	0.99	5	3	2	3	13	8	0.99
152579	NP_689753.2		SCFD2	sec1 family domain containing 2	0	0	2	2	3	1	8	4		4	4	3	3	14	6	1.00	3	3	4	2	12	6	0.99
26278	NP_055178.3		SACS	sacsin molecular chaperone	0	0	2	0	4	2	8	7		9	8	9	10	36	24	1.00	7	2	0	1	10	6
6009	NP_005605.1		RHEB	Ras homolog enriched in brain	1	1	2	0	2	4	8	5		7	6	6	5	24	15	1.00	0	5	0	2	7	5
54859	NP_001026873.2		C3orf75	elongator acetyltransferase complex subunit 6	0	0	0	3	3	2	8	4		2	2	4	3	11	6	0.99	2	1	2	1	6	4
1457	NP_808227.1		CSNK2A1	casein kinase 2 alpha 1	1	1	0	2	3	2	7	4		4	5	7	6	22	9	1.00	9	8	7	2	26	9	1.00
9810	NP_001193962.1		RNF40	ring finger protein 40	0	0	4	2	0	1	7	4		0	2	0	1	3	3		4	9	4	4	21	11	1.00
26272	NP_036308.1		FBXO4	F-box protein 4	0	0	0	4	1	2	7	5		3	0	5	3	11	6		6	7	2	2	17	6	0.99
64601	NP_072097.2		VPS16	VPS16, CORVET/HOPS core subunit	1	0	0	0	2	5	7	5		0	0	2	2	4	3		2	4	3	7	16	10	0.99
85365	NP_149078.1		ALG2	ALG2, alpha-1,3/1,6-mannosyltransferase	0	0	0	3	3	1	7	5		7	5	2	3	17	9	1.00	6	3	2	5	16	8	1.00
26276	NP_061138.3		VPS33B	VPS33B, late endosome and lysosome associated	0	0	2	0	2	3	7	6		2	0	2	2	6	4		2	6	3	4	15	9	0.99
26275	NP_932164.1		HIBCH	3-hydroxyisobutyryl-CoA hydrolase	0	0	2	0	3	2	7	5		7	3	1	5	16	8		3	4	2	4	13	7	0.99
208	NP_001229956.1		AKT2	AKT serine/threonine kinase 2	1	0	1	0	3	3	7	6		4	3	4	4	15	8	1.00	4	2	4	2	12	8	0.99
9146	NP_004703.1		HGS	hepatocyte growth factor-regulated tyrosine kinase substrate	0	0	4	0	1	2	7	4		3	2	5	3	13	9	0.99	4	4	2	1	11	6
57038	NP_064716.2		RARS2	arginyl-tRNA synthetase 2, mitochondrial	0	0	2	0	2	3	7	4		5	2	3	3	13	8	0.99	0	0	0	0	0	0
10482	NP_001074960.1		NXF1	nuclear RNA export factor 1	3	2	2	0	2	2	6	6		11	3	5	4	23	16		11	11	14	9	45	23	0.99
7874	NP_003461.2		USP7	ubiquitin specific peptidase 7	1	0	6	0	0	0	6	3		0	1	0	0	1	1		10	14	4	6	34	19	1.00
6936	NP_001188263.1		GCFC2	GC-rich sequence DNA-binding factor 2	0	0	0	3	2	1	6	4		3	0	2	0	5	4		7	5	5	4	21	10	1.00
84320	NP_115736.1		ACBD6	acyl-CoA binding domain containing 6	0	0	4	2	0	0	6	2		6	3	1	3	13	7		4	7	4	2	17	10	1.00
830	NP_006127.1		CAPZA2	capping actin protein of muscle Z-line alpha subunit 2	0	0	0	0	3	3	6	4		0	4	2	3	9	5		2	7	4	4	17	7	1.00
79042	NP_076980.2		TSEN34	tRNA splicing endonuclease subunit 34	0	0	2	2	0	2	6	3		4	2	3	4	13	6	0.99	5	6	1	4	16	4	0.75
84498	NP_115824.1		FAM120B	family with sequence similarity 120B	1	0	0	2	1	3	6	4		2	1	2	3	8	6		0	4	5	5	14	10	0.75
9260	NP_005442.2		PDLIM7	PDZ and LIM domain 7	0	0	3	2	1	0	6	5		8	4	5	5	22	12	1.00	8	0	2	4	14	5
51130	NP_665862.1		ASB3	ankyrin repeat and SOCS box containing 3	0	0	3	2	0	1	6	3		2	2	2	1	7	4		2	5	3	2	12	5	0.99
285282	NP_776186.2		RABL3	RAB, member of RAS oncogene family like 3	0	0	3	0	0	3	6	4		3	3	2	0	8	6		2	2	3	3	10	7	0.99
8473	NP_858058.1		OGT	O-linked N-acetylglucosamine (GlcNAc) transferase	2	1	0	2	1	3	6	5		5	3	5	4	17	10	0.83	0	2	3	3	8	6
8776	NP_003819.1		MTMR1	myotubularin related protein 1	0	0	0	2	1	3	6	4		4	2	2	4	12	7	0.99	3	2	2	0	7	5
9972	NP_005115.2		NUP153	nucleoporin 153	2	0	0	1	1	3	5	4		2	0	2	2	6	4		9	3	8	6	26	15	0.90
9736	NP_055524.3		USP34	ubiquitin specific peptidase 34	1	0	2	3	0	0	5	3		2	0	0	0	2	1		9	9	3	3	24	13	1.00
4659	NP_001137357.1		PPP1R12A	protein phosphatase 1 regulatory subunit 12A	0	0	2	3	0	0	5	3		5	5	4	1	15	10	0.75	8	4	4	5	21	11	1.00
23326	NP_056091.1		USP22	ubiquitin specific peptidase 22	0	0	2	3	0	0	5	2		2	0	0	3	5	3		4	4	5	6	19	7	1.00
79707	NP_078930.3		NOL9	nucleolar protein 9	2	1	0	4	0	1	5	3		3	0	1	0	4	2		8	6	2	3	19	10	0.75
27292	NP_055288.1		DIMT1	DIM1 dimethyladenosine transferase 1 homolog	2	0	0	2	0	3	5	2		3	2	5	4	14	10		6	6	3	3	18	12	0.81
79033	NP_076971.1		ERI3	ERI1 exoribonuclease family member 3	0	0	2	1	0	2	5	4		3	3	0	1	7	3		5	3	3	2	13	6	0.99
22933	NP_036369.2		SIRT2	sirtuin 2	0	0	2	2	1	0	5	3		2	1	3	1	7	5		2	4	2	2	10	7	0.99
2539	NP_001035810.1		G6PD	glucose-6-phosphate dehydrogenase	0	0	0	0	3	2	5	4		2	2	4	3	11	6	0.99	1	2	3	3	9	5
90390	NP_542382.1		MED30	mediator complex subunit 30	0	0	2	2	1	0	5	3		4	2	3	4	13	8	0.99	0	2	2	1	5	3
3551	NP_001177649.1		IKBKB	inhibitor of nuclear factor kappa B kinase subunit beta	0	0	0	4	0	0	4	2		8	4	5	5	22	14	1.00	9	8	7	4	28	13	1.00
6908	NP_001165556.1		TBP	TATA-box binding protein	0	0	2	0	0	2	4	3		3	2	2	2	9	5	0.99	0	2	2	2	6	3
1147	NP_001269.3		CHUK	conserved helix-loop-helix ubiquitous kinase	0	0	0	0	1	2	3	3		8	6	4	2	20	15	1.00	7	14	4	3	28	14	1.00
5430	NP_000928.1		POLR2A	RNA polymerase II subunit A	0	0	3	0	0	0	3	3		0	0	0	0	0	0		4	10	4	3	21	13	1.00
6342	NP_002970.2		SCP2	sterol carrier protein 2	1	0	0	0	1	2	3	2		5	4	1	3	13	7		5	6	2	2	15	6	0.99
10013	NP_006035.2		HDAC6	histone deacetylase 6	0	0	0	0	2	1	3	3		2	1	0	2	5	3		4	4	4	3	15	5	1.00
4931	NP_001230075.1		NVL	nuclear VCP-like	0	0	2	1	0	0	3	2		4	2	0	2	8	5		2	3	2	3	10	7	0.99
317	NP_863651.1		APAF1	apoptotic peptidase activating factor 1	0	0	2	0	0	0	2	1		5	9	1	2	17	10		10	11	2	2	25	11	0.99
8732	NP_003791.3		RNGTT	RNA guanylyltransferase and 5'-phosphatase	0	0	1	0	1	0	2	2		4	4	2	3	13	7	0.99	8	9	3	3	23	8	1.00
9330	NP_036218.1		GTF3C3	general transcription factor IIIC subunit 3	1	1	0	0	2	0	2	2		4	0	0	1	5	3		7	9	3	4	23	12	1.00
83594	NP_113626.1		NUDT12	nudix hydrolase 12	0	0	0	0	1	1	2	2		7	0	5	4	16	8	0.75	2	5	6	6	19	10	1.00
55153	NP_060585.2		SDAD1	SDA1 domain containing 1	1	0	0	1	0	1	2	2		0	0	0	0	0	0		4	10	2	2	18	8	0.99
112858	NP_291028.3		TP53RK	TP53 regulating kinase	0	0	0	2	0	0	2	1		0	4	0	0	4	3		4	6	4	1	15	8	0.75
7026	NP_066285.1		NR2F2	nuclear receptor subfamily 2 group F member 2	0	0	2	0	0	0	2	2		3	2	0	0	5	4		7	2	4	2	15	7	0.99
9820	NP_001161842.1		CUL7	cullin 7	0	0	2	0	0	0	2	1		0	1	1	0	2	2		6	4	2	2	14	8	0.99
4350	NP_001015052.1		MPG	N-methylpurine DNA glycosylase	0	0	0	1	0	0	1	1		0	3	2	0	5	4		13	7	2	4	26	10	1.00
10120	NP_005726.1		ACTR1B	ARP1 actin related protein 1 homolog B	0	0	1	0	0	0	1	1		2	0	0	0	2	1		6	13	2	2	23	8	0.99
79612	NP_001104268.1		NAA16	N(alpha)-acetyltransferase 16, NatA auxiliary subunit	0	0	1	0	0	0	1	1		4	4	3	5	16	9	1.00	10	7	4	1	22	7	0.75
23473	NP_055111.1		CAPN7	calpain 7	0	0	0	0	0	1	1	1		5	4	2	3	14	8	0.99	6	9	3	0	18	7
3337	NP_006136.1		DNAJB1	DnaJ heat shock protein family (Hsp40) member B1	0	0	0	0	0	0	0	0		7	3	5	2	17	7	1.00	10	6	4	3	23	7	1.00
5286	NP_002636.2		PIK3C2A	phosphatidylinositol-4-phosphate 3-kinase catalytic subunit type 2 alpha	0	0	0	0	0	0	0	0		0	3	2	0	5	4		6	5	4	0	15	9	0.75
54930	NP_060285.2		HAUS4	HAUS augmin like complex subunit 4	1	0	0	0	0	0	0	0		3	0	0	3	6	4		2	2	3	3	10	6	0.99
11188	NP_009115.2		NISCH	nischarin	0	0	0	0	0	0	0	0		4	2	2	2	10	6	0.99	0	2	2	3	7	5

## Sheet: Table S3-GO CC
Table S3. Gene Ontology analysis of the proteins specifically detected with BioID or IP-MS. Analysis focused on the major cellular components. GO: Gene Ontology, NI: Not identified.
	BioID-identified proteins not identified with IP-MS			IP-MS-identified proteins not identified with BioID
GO Cellular Component	Count	Gene ID	p value	Count	Gene ID	p value
GO:0005886~plasma membrane	423	100506658, 64398, 81609, 81848, 56776, 79651, 4729, 5818, 253832, 5819, 56650, 57620, 3993, 10890, 55327, 3996, 10652, 65010, 81839, 9076, 51094, 1464, 4851, 3643, 4853, 4735, 10423, 23705, 22859, 90102, 1000, 143098, 6809, 84902, 55103, 4864, 374291, 3672, 55591, 10768, 55117, 10409, 6810, 5962, 6812, 5604, 3309, 5605, 949, 708, 4771, 3321, 114787, 79572, 58513, 55243, 57669, 3556, 10979, 145567…	1.83281e-49	NI	NI	NI
GO:0030054~cell junction	229	8773, 8650, 100506658, 64398, 81848, 117583, 5818, 5819, 476, 2665, 23042, 23164, 118, 10890, 8649, 54910, 55327, 10652, 5034, 4067, 8301, 24145, 9076, 481, 120, 1466, 1464, 4851, 11078, 83461, 4735, 23705, 22859, 90102, 1000, 64855, 143098, 10755, 375, 6809, 51429, 4869, 153562, 3672, 382, 55591, 4082, 10525, 23390, 10409, 23396, 5962, 6811, 5604, 3309, 5605, 55914, 8573, 4771, 391, 392, 5062, 5…	8.4755e-73	NI	NI	NI
GO:0005856~cytoskeleton	160	9344, 908, 9342, 8655, 7289, 5783, 5663, 5784, 5147, 7203, 23048, 57584, 22873, 94121, 56776, 55964, 768211, 84445, 54874, 23043, 23164, 1452, 118, 3993, 119, 55845, 3996, 1739, 6868, 55607, 9475, 6641, 9230, 1073, 1072, 2040, 120, 83987, 55971, 10788, 55612, 23176, 11078, 6513, 889, 54888, 151011, 4735, 8936, 134492, 27, 90102, 4354, 9368, 1000, 64855, 22852, 83657, 84902, 55742, 79834, 6645, 96…	2.58029e-12	107	10094, 10097, 10096, 9183, 472, 55201, 991, 6905, 283489, 79659, 9735, 10013, 55207, 51765, 8801, 6624, 64151, 6904, 10533, 9474, 14, 5432, 23332, 1861, 55698, 8934, 10300, 5289, 5048, 27229, 55860, 54930, 2288, 27183, 51668, 6386, 1809, 4641, 23392, 1808, 701, 10120, 6897, 824, 4999, 83481, 8452, 11020, 9820, 9260, 1656, 311, 10735, 830, 4642, 8723, 4646, 10059, 8727, 10456, 8189, 9793, 30849, 2…	0.147749
GO:0005768~endosome	105	8650, 10490, 81609, 3482, 57182, 9341, 94121, 476, 23043, 10938, 85377, 10890, 8649, 65082, 84168, 3996, 10652, 6643, 6642, 10818, 2043, 2042, 9230, 79643, 10948, 57599, 55737, 3643, 56829, 1508, 10542, 8674, 9765, 389541, 23545, 28956, 375, 261729, 29763, 4864, 538, 10079, 51429, 63894, 29934, 2064, 382, 25978, 9372, 51272, 201475, 55198, 302, 57498, 6810, 5604, 5605, 9784, 23527, 5584, 4771, 26…	2.33376e-22	53	9146, 9980, 149371, 5861, 57020, 55361, 6272, 26276, 950, 4642, 51324, 8723, 10013, 55207, 30849, 64841, 11230, 11031, 8027, 64601, 161, 163, 164, 29110, 84313, 55610, 55697, 10066, 8934, 8218, 51534, 51699, 64083, 5867, 58528, 5869, 10226, 4430, 5289, 28952, 3064, 27229, 6293, 57448, 26130, 5912, 27183, 9777, 5298, 112936, 23392, 55275, 57617	0.0226075
GO:0005829~cytosol	241	25902, 908, 4176, 8655, 7204, 5147, 7203, 23167, 81609, 56776, 2665, 10419, 54477, 51520, 1452, 118, 119, 91768, 10652, 2549, 5151, 6000, 7334, 4067, 7335, 79084, 139818, 55690, 120, 10788, 79643, 5709, 55699, 4851, 83461, 10542, 5825, 8677, 27, 11163, 29801, 253260, 64855, 29927, 10755, 375, 84902, 378, 9639, 4869, 7110, 4085, 5296, 2584, 94134, 5291, 6817, 10768, 23396, 6810, 6812, 6811, 9527, …	1.18077e-14	314	9980, 25904, 8776, 10094, 11065, 10097, 10096, 9061, 9183, 22872, 9060, 23049, 6470, 55201, 1457, 4048, 79659, 9735, 9736, 51765, 10892, 57505, 64151, 10533, 6241, 6240, 16, 64841, 9632, 11196, 28985, 23171, 10427, 84313, 57510, 51534, 5702, 348995, 5286, 5289, 8675, 5048, 9088, 3417, 54930, 57521, 7337, 10197, 6009, 27183, 817, 3418, 6386, 7353, 4087, 5298, 7358, 4641, 1809, 3551, 2582, 23279, 2…	1.40166e-43
GO:0005783~endoplasmic reticulum	114	10490, 5663, 55161, 79651, 56776, 476, 57620, 10890, 51128, 6745, 1739, 10652, 65010, 5034, 24145, 2043, 2040, 488, 8813, 4851, 4853, 60481, 56704, 10423, 84061, 9524, 27346, 29927, 57003, 387597, 4864, 538, 813, 3930, 6646, 5955, 387914, 7110, 7355, 5332, 6786, 2182, 2181, 10525, 10768, 821, 667, 9526, 6811, 5604, 10006, 9926, 5605, 3309, 3703, 9789, 391, 394, 23767, 550, 79971, 84803, 10857, 54…	7.65602e-06	112	94005, 9183, 22872, 7162, 79135, 871, 51124, 22908, 9632, 11196, 60526, 51251, 2677, 10427, 1861, 54884, 55697, 85365, 11160, 29929, 2052, 9088, 29880, 10999, 23141, 1595, 51024, 2288, 9517, 51026, 6009, 51303, 817, 2180, 6386, 7353, 4121, 5298, 64222, 64225, 57130, 8560, 81502, 662, 23392, 57136, 51035, 10484, 824, 1528, 7905, 5580, 6396, 5861, 5862, 57142, 2590, 6272, 2589, 23480, 25782, 4642, …	2.70429e-05
GO:0005794~Golgi apparatus	128	9342, 10490, 5663, 6510, 23048, 57584, 3482, 9341, 81848, 476, 2665, 10419, 23042, 54874, 79932, 85377, 10890, 51125, 83871, 51128, 3996, 1739, 10652, 4067, 8301, 6642, 2043, 79084, 55690, 1464, 6513, 4851, 10384, 4853, 56829, 11079, 10423, 8674, 8677, 57120, 29801, 375, 261729, 378, 4864, 538, 813, 10079, 51429, 7110, 7355, 22905, 27236, 381, 382, 2181, 51272, 23390, 201475, 6810, 9527, 6811, 56…	1.01103e-12	98	9980, 22872, 79135, 51124, 79659, 22908, 51765, 8546, 64841, 9632, 11196, 23332, 10427, 55697, 57511, 8934, 2956, 54928, 5286, 11041, 8675, 9088, 84342, 51026, 283464, 6009, 80142, 91949, 4121, 9777, 5298, 4124, 2580, 81502, 23392, 545, 10484, 824, 8452, 6396, 5861, 9820, 5862, 22796, 8295, 2590, 55361, 6272, 9382, 51280, 2589, 51324, 8729, 4646, 10059, 5738, 25839, 11031, 23256, 51290, 161, 162,…	0.000262189
GO:0005739~mitochondrion	118	25902, 8655, 5663, 7284, 133308, 4729, 22907, 4720, 10131, 55967, 637, 4722, 4723, 10652, 7298, 4067, 25994, 10939, 2043, 9230, 2040, 125988, 1347, 55210, 1468, 55699, 28982, 10948, 55737, 4698, 1508, 51537, 92609, 5825, 8936, 29801, 84902, 498, 5315, 374291, 10632, 10478, 2066, 9131, 25978, 2182, 2181, 10128, 11331, 9526, 6812, 5604, 5605, 3309, 708, 6794, 26517, 25824, 1654, 4521, 5577, 11022, …	2.86547e-06	150	5300, 6470, 79135, 2820, 26275, 26278, 55847, 4686, 8802, 79934, 8803, 10651, 8801, 5019, 57505, 10531, 57506, 4329, 7296, 4580, 9238, 16, 9512, 23576, 9352, 1192, 51251, 2710, 51097, 523, 8934, 11112, 9868, 4976, 84274, 5163, 4350, 5165, 6652, 6774, 3420, 5160, 9361, 3417, 51020, 114971, 51024, 2288, 9517, 10352, 11321, 60493, 80142, 3419, 84340, 54936, 3418, 284273, 2180, 8443, 22868, 132001, 5…	3.18758e-16
GO:0005764~lysosome	44	8773, 8674, 7782, 10490, 5663, 389541, 57120, 1186, 27346, 23048, 3482, 256471, 23545, 28956, 6809, 55004, 57707, 8649, 10670, 4864, 5337, 65082, 6845, 5878, 6560, 64121, 4067, 25978, 1601, 55255, 201475, 2799, 3326, 302, 1464, 10948, 57599, 55737, 56829, 1508, 10542, 6714, 55717, 949	0.000657944	32	8078, 5167, 5289, 5862, 221960, 55361, 6272, 311, 26276, 950, 57521, 55207, 6009, 4646, 51449, 27183, 29919, 8546, 64601, 2581, 161, 162, 163, 164, 81502, 445, 523, 7249, 823, 824, 58528, 57617	0.298091

## Sheet: Table S4-GO BP
Table S4. Top ten enriched Gene Ontology Biological Process for the cytosolic proteins specifically detected with BioID or IP-MS. GO: Gene Ontology
		Count	Gene ID	p value
TOP10 enriched GO Biological Process for the cytosolic BioID-detected proteins not detected with IP-MS	GO:0035556~intracellular signal transduction	104	7204,9462,56776,2665,10419,55845,637,1739,55607,2549,5151,9475,6000,7334,4067,7335,83737,139818,5709,4851,55615,10542,11163,253260,8394,375,378,9639,8826,4869,5296,5332,5576,2066,9131,94134,9495,5291,7074,57498,116984,23396,5604,5605,708,8454,51719,5584,6794,391,392,394,23007,396,6709,1654,85456,54795,5577,4140,64121,5870,7531,23413,6711,50488,207,4534,5865,6712,7529,5901,6714,9722,8997,10152,904…	1.6e-19
	GO:0030036~actin cytoskeleton organization	45	8655,5584,27,10152,253260,23002,391,8394,91010,396,56776,10458,375,6709,114793,55742,118,9639,119,71,55845,1739,5911,55607,9475,5770,58,9855,10163,11252,8500,57175,27236,55971,10602,10788,23396,6711,50488,79109,6712,5901,6714,10006,10049	3.1e-17
	GO:0016310~phosphorylation	85	8454,51719,8573,11140,8655,5584,6794,7204,23167,9462,5062,6709,10419,145567,1452,5577,5214,1739,5218,55607,2549,5151,4140,9475,7532,4067,92335,83737,5709,3326,2597,6711,50488,7525,55615,207,6712,7529,6714,27,8997,10152,253260,8394,2050,84668,55781,2048,1399,58533,55704,538,8503,5315,5515,5911,65062,10399,8826,4869,6461,5296,5770,5211,7157,7314,5576,2584,2066,200734,23236,5291,9693,7074,22821,983,…	2.2e-14
	GO:0015031~protein transport	75	9784,11140,8655,5584,10490,6950,81609,9341,56776,2665,54795,83874,51128,637,8724,10652,93343,7532,5870,4067,7531,9712,92335,7534,6643,7533,6642,55690,10228,79643,3326,26000,6711,55737,6513,4851,207,4534,5865,7529,5901,6714,8677,29801,8394,29927,22931,10755,375,378,58533,6726,10399,4869,5296,5770,5211,7157,2066,27236,9495,25978,7074,51272,10768,983,302,56288,153090,6810,51510,6812,6811,9527,6616	2.3e-13
	GO:0009966~regulation of signal transduction	93	11140,8655,6794,7204,391,26119,392,9462,394,5062,396,1654,10419,2665,54795,1452,637,8724,1739,5218,2549,5151,93343,6000,64121,7334,7532,4067,7531,7534,7335,7533,83737,55971,5709,1500,3326,50488,55737,4851,55615,207,4534,7529,10542,6714,9722,8997,253260,8471,8394,10755,1399,58533,51741,9639,10670,55789,5515,5911,65062,10399,8826,6461,5296,5770,7157,9855,7314,2066,25776,200734,94134,23236,9495,5291…	3.6e-13
	GO:0043087~regulation of GTPase activity	43	8997,7204,5147,253260,391,392,8394,9462,394,23348,396,6709,2665,378,1793,83874,4301,9639,55789,10399,8826,5296,6000,9712,9855,2066,23236,94134,9693,80728,139818,7074,22821,10602,10788,26000,116984,153090,6711,10681,6712,5922,10542	1.6e-12
	GO:0007264~small GTPase mediated signal transduction	36	8997,7204,10152,391,392,9462,394,23348,22931,396,375,2665,378,1399,1793,9639,55845,5911,9475,64121,5870,7157,9855,10163,9693,139818,7074,22821,10602,153090,79109,89941,5865,5922,5901,6714	2.1e-11
	GO:0007167~enzyme linked receptor protein signaling pathway	48	11140,6794,27,8997,7204,9040,8471,2050,5062,63916,10755,10458,378,2048,10979,1793,58533,71,55845,8503,10135,8826,2549,6461,5296,9475,5770,93343,4067,7314,10163,2066,200734,23236,9693,5291,7074,55971,3326,56288,153090,7525,4851,6711,207,60,6714,10006	4.6e-11
	GO:1990778~protein localization to cell periphery	24	9475,5584,8997,10490,8500,23167,391,26119,8394,9341,9693,55690,84668,302,145567,6711,55737,6810,207,6812,1739,51248,5911,10399	7.4e-11
	GO:0016197~endosomal transport	25	9784,8677,10490,81609,9341,375,83874,58533,8724,10652,5870,9712,7314,6643,6642,25978,51272,10228,79643,26000,55737,51510,4534,6811,9527	7.4e-11
TOP10 enriched GO Biological Process for the cytosolic IP-MS-detected proteins not detected with BioID	GO:1903047~mitotic cell cycle process	66	8453,8452,25904,11065,8697,9820,23244,9183,8450,991,1457,4927,4928,10735,9735,5536,64151,6241,9793,64682,23332,8065,8021,23019,56984,55055,51451,25793,5500,60561,8218,5702,4659,8815,348995,22933,9125,91754,5048,3064,9088,27229,54930,23063,57521,29883,10197,55746,27183,9918,817,5518,7277,8881,5530,23279,79023,581,121441,701,51434,5721,51433,5921,5527,2935	8.8e-18
	GO:0015031~protein transport	90	9146,5580,9980,149371,6396,5861,9183,22872,22796,3836,4927,3838,23480,4928,3839,55763,10055,7514,79659,10013,8729,4646,10059,10533,30849,9632,11196,8027,23256,161,162,8021,163,164,11316,10427,55770,84313,523,57510,25793,8615,8934,60561,7249,3842,8218,51534,51699,64083,10466,5867,6717,348995,5289,65985,8675,5048,6730,6774,6293,1315,60412,55666,5478,54536,55746,27183,55705,10434,23637,6386,7353,408…	9.8e-14
	GO:0044265~cellular macromolecule catabolic process	57	8453,8452,25904,11065,8697,9820,23049,8570,8450,23644,26272,3836,991,7917,1656,4686,317,10013,9736,5976,64682,23376,8065,23019,51010,84313,841,51377,25793,80153,5702,22933,9125,9320,10273,55181,55666,29883,7337,10197,27183,5518,6386,8881,7353,9810,7874,581,10724,51035,701,51434,5721,51433,824,5527,2935	4.4e-11
	GO:0048193~Golgi vesicle transport	30	9980,8452,6396,5861,9183,22872,22796,3064,6272,6293,1315,55763,79659,8729,9632,11196,23256,2580,22820,164,11316,55770,10427,1783,8934,8615,10484,60561,64083,10466	9.8e-10
	GO:0006461~protein complex assembly	61	5580,8452,149371,6396,10094,11065,5861,10097,10096,9380,9183,22872,8450,2193,6470,4928,3839,158,830,317,9735,10013,10892,5536,10056,6624,57505,10059,6241,6240,9793,9632,11196,23332,23256,163,56984,10427,55770,841,51451,8615,3842,5702,22933,5286,10273,27229,3611,2288,5910,817,5518,25814,4087,1809,4641,581,10484,1729,5921	1.1e-06
	GO:0032269~negative regulation of cellular protein metabolic process	48	5580,22933,9125,8473,9320,8452,5300,11065,8697,6774,5048,8570,991,7917,1457,3611,29883,10197,10013,5976,5536,5518,6386,64682,8881,4087,5530,9698,23376,3551,5170,581,23019,23171,1445,841,57510,51377,25793,51035,51434,701,7249,5721,51433,868,5702,2539	1.1e-06
	GO:0051169~nuclear transport	31	348995,5580,6774,23049,3836,3838,4927,4928,3839,4686,7514,55746,10892,5976,55705,8487,5530,10482,23279,8021,79023,51194,10527,10526,57510,7249,868,3842,8815,6717,51517	1.2e-06
	GO:0042176~regulation of protein catabolic process	27	9146,22933,10273,5300,11065,8697,8450,991,7917,1457,7514,10197,7337,10533,6386,64682,8881,9810,23376,23192,51377,51035,51434,701,5721,51433,5702	1.5e-06
	GO:0006913~nucleocytoplasmic transport	30	348995,5580,6774,23049,3836,3838,4927,4928,3839,4686,7514,55746,10892,5976,55705,8487,5530,10482,23279,8021,79023,51194,10527,10526,57510,7249,868,3842,6717,51517	2.7e-06
	GO:0044267~cellular protein metabolic process	141	25904,8776,9107,11065,5300,23049,6470,26272,991,1457,4686,79934,10013,9736,51765,10892,5536,57505,10533,8805,9474,64682,16,28985,8021,7174,23171,84313,57510,51377,283871,5702,348995,9125,4351,5289,6654,6774,5048,55181,9088,56270,57521,29883,2288,7337,10197,55746,27183,817,5571,6386,7353,4087,9810,6301,7874,3551,23279,2580,5170,79023,51035,701,51434,5721,51433,6897,6416,824,8453,9146,5580,8452,869…	2.7e-06

## Sheet: Table S5-KEGG analysis
Table S5. KEGG analysis. List of proteins belonging to the KEGG terms "Regulation of actin cytoskeleton (hsa04810)" and "Endocytosis (hsa04144)", and identified after KEGG analyses.
Regulation of actin cytoskeleton (hsa04810) - Protein identified n=45								Endocytosis (hsa04144) - Protein identified n=42
Gene Name	Gene Full Name							Gene Name	Gene Full Name
ABI2	abl-interactor 2							ARF1	ADP ribosylation factor 1
ACTB	actin, beta							ARF5	ADP ribosylation factor 5
ACTG1	actin gamma 1							ARF6	ADP ribosylation factor 6
ARAF	A-Raf proto-oncogene, serine/threonine kinase							AGAP1	ArfGAP with GTPase domain, ankyrin repeat and PH domain 1
ARHGEF10	Rho guanine nucleotide exchange factor 10							ARAP2	ArfGAP with RhoGAP domain, ankyrin repeat and PH domain 2
TRIO	trio Rho guanine nucleotide exchange factor							CAV1	caveolin 1
KALRN	kalirin, RhoGEF kinase							CDC42	cell division cycle 42
BAIAP2	BAI1-associated protein 2							CHMP2B	charged multivesicular body protein 2B
BRAF	B-Raf proto-oncogene, serine/threonine kinase							CHMP5	charged multivesicular body protein 5
BRK1	BRICK1, SCAR/WAVE actin-nucleating complex subunit							CHMP6	charged multivesicular body protein 6
CDC42	cell division cycle 42							DAB2	Dab, mitogen-responsive phosphoprotein, homolog 2 (Drosophila)
CFL1	cofilin 1 (non-muscle)							EHD1	EH domain containing 1
DOCK1	dedicator of cytokinesis 1							EHD4	EH domain containing 4
GNA13	guanine nucleotide binding protein (G protein), alpha 13							HSPA5	heat shock protein family A (Hsp70) member 5
IQGAP2	IQ motif containing GTPase activating protein 2							IGF2R	insulin like growth factor 2 receptor
ITGA1	integrin subunit alpha 1							ITCH	itchy E3 ubiquitin protein ligase
ITGA2	integrin subunit alpha 2							LDLRAP1	low density lipoprotein receptor adaptor protein 1
ITGA3	integrin subunit alpha 3							NEDD4L	neural precursor cell expressed, developmentally down-regulated 4-like, E3 ubiquitin protein ligase
ITGA4	integrin subunit alpha 4							PARD3	par-3 family cell polarity regulator
ITGA5	integrin subunit alpha 5							PLD1	phospholipase D1
ITGA6	integrin subunit alpha 6							PDCD6IP	programmed cell death 6 interacting protein
ITGA7	integrin subunit alpha 7							PRKCI	protein kinase C, iota
ITGA8	integrin subunit alpha 8							RAB10	RAB10, member RAS oncogene family
ITGAV	integrin subunit alpha V							RAB11FIP1	RAB11 family interacting protein 1 (class I)
ITGB1	integrin subunit beta 1							RAB11FIP2	RAB11 family interacting protein 2 (class I)
ITGB5	integrin subunit beta 5							RAB11FIP5	RAB11 family interacting protein 5 (class I)
MAP2K1	mitogen-activated protein kinase kinase 1							RAB11B	RAB11B, member RAS oncogene family
MAP2K2	mitogen-activated protein kinase kinase 2							RAB5A	RAB5A, member RAS oncogene family
MSN	moesin							RAB5C	RAB5C, member RAS oncogene family
NCKAP1	NCK-associated protein 1							RAB7A	RAB7A, member RAS oncogene family
PAK2	p21 protein (Cdc42/Rac)-activated kinase 2							RAB8A	RAB8A, member RAS oncogene family
PAK4	p21 protein (Cdc42/Rac)-activated kinase 4							SNX1	sorting nexin 1
PIK3CA	phosphatidylinositol-4,5-bisphosphate 3-kinase catalytic subunit alpha							SNX12	sorting nexin 12
PIK3CB	phosphatidylinositol-4,5-bisphosphate 3-kinase catalytic subunit beta							SNX2	sorting nexin 2
PIK3R1	phosphoinositide-3-kinase regulatory subunit 1							SNX3	sorting nexin 3
PIK3R2	phosphoinositide-3-kinase regulatory subunit 2							SNX6	sorting nexin 6
PIK3R3	phosphoinositide-3-kinase regulatory subunit 3							SNX9	sorting nexin 9
RAF1	Raf-1 proto-oncogene, serine/threonine kinase							TFRC	transferrin receptor
RDX	radixin							UBB	ubiquitin B
ROCK1	Rho-associated, coiled-coil containing protein kinase 1							VPS45	vacuolar protein sorting 45 homolog (S. cerevisiae)
ROCK2	Rho-associated, coiled-coil containing protein kinase 2							VPS35	VPS35 retromer complex component
SLC9A1	solute carrier family 9, subfamily A (NHE1, cation proton antiporter 1), member 1							ZFYVE9	zinc finger, FYVE domain containing 9
TIAM1	T-cell lymphoma invasion and metastasis 1
WASF1	WAS protein family member 1
WASF2	WAS protein family member 2

## Sheet: TableS6-Pref. PPI
Table S6. Total spectral count log2 ratio for each pairs of RAS paralogs. Log2 ratio of total spectral counts detected for each of the indicated polypeptides according to the corresponding baits: FB-KRAS versus FB-HRAS, FB-KRAS versus FB-NRAS, FB-NRAS versus FB-HRAS. One spectral count was added to all totals for this analysis, to avoid division by 0. Only hits with log2 fold-change ≥ 1 (absolute…
Gene Name	Bait preferential proximal interactor	Log2 ratio FB-KRAS/FB-HRAS	Student's t-test p-value		Gene Name	Bait preferential proximal interactor	Log2 ratio FB-KRAS/FB-NRAS	Student's t-test p-value		Gene Name	Bait preferential proximal interactor	Log2 ratio FB-NRAS/FB-HRAS	Student's t-test p-value
C15orf38	HRAS	-8.01123	1.8141e-06		VTI1B	KRAS	1	0.000499727		ABCE1	HRAS	-1.43769	2.21079e-05
RRAGA	HRAS	-6.14975	5.03896e-05		CDC42	KRAS	1.00899	8.68494e-05		ACAP2	HRAS	-3.12928	0.00119733
B2M	HRAS	-5.04439	0.000614877		FNBP1	KRAS	1.01436	0.00777441		ACSL4	HRAS	-1.35845	0.000326171
ADAM15	HRAS	-4.70044	0.00393656		CNNM4	KRAS	1.03103	0.0118621		ADAM15	HRAS	-3.70044	0.00516277
BTN3A1	HRAS	-4.70044	0.000332137		ITCH	KRAS	1.03242	0.000931383		ADAM17	HRAS	-1.41504	0.0108604
SLCO4C1	HRAS	-4.45943	0.00320671		IGF2R	KRAS	1.03395	0.00328242		ADCY3	HRAS	-1.37851	0.0112098
C12orf75	HRAS	-4.39232	0.00154742		TNKS1BP1	KRAS	1.04182	0.0337505		ADIPOR1	HRAS	-1.28011	1.91303e-05
DYNLL1	HRAS	-4.24793	0.00143953		TRIO	KRAS	1.05184	0.0141101		AGAP1	HRAS	-1.04439	0.0377777
LASP1	HRAS	-4.10852	4.38615e-05		ERBB2	KRAS	1.07276	0.00231149		AHCYL1	HRAS	-1.77118	9.98893e-05
S100A11	HRAS	-4.02975	1.47699e-05		WDR41	KRAS	1.07325	0.000530991		AHCYL2	HRAS	-1.74076	0.000124056
SNX12	HRAS	-4.02975	0.000697742		SCD	KRAS	1.08746	0.0388027		AIDA	HRAS	-2.24793	6.4242e-05
RAB11FIP2	HRAS	-3.822	2.6619e-06		RALGPS2	KRAS	1.08746	0.011696		ANO6	HRAS	-1.32193	0.000952861
PITPNB	HRAS	-3.80735	0.000499727		PSTPIP2	KRAS	1.0902	0.000487416		ANXA2	HRAS	-1.23283	2.08873e-06
ADAM17	HRAS	-3.58496	0.000437868		DGKD	KRAS	1.09954	0.0300197		APPL2	HRAS	-1.09954	0.0385586
TTC39C	HRAS	-3.58496	0.00121036		CLCN7	KRAS	1.11346	0.000984421		ARF5	HRAS	-1.54749	0.0178548
CDC42EP3	HRAS	-3.41504	0.00568329		SPTBN2	KRAS	1.12199	0.0499807		ARHGAP1	HRAS	-1.11165	0.00202937
ZDHHC18	HRAS	-3.29278	0.00361186		GOLGA7	KRAS	1.1375	0.0240082		ARHGAP39	HRAS	-1.20163	0.0229161
FBXO17	HRAS	-3.08746	0.00137686		MTMR12	KRAS	1.1375	0.0220965		ARHGDIA	HRAS	-1.28204	1.30491e-05
TOMM6	HRAS	-3.08746	0.00461025		ARHGAP39	KRAS	1.1375	0.0150107		ARL6IP5	HRAS	-1.85415	0.00414657
LYPLA2	HRAS	-2.94145	4.89108e-05		LAMTOR3	KRAS	1.16993	0.0461642		ATP1A1	HRAS	-1.27069	0.000436579
NOLC1	HRAS	-2.92376	4.18907e-05		STEAP2	KRAS	1.1964	0.00597808		ATP2A2	HRAS	-1.81752	2.24742e-05
CHMP6	HRAS	-2.92283	7.70563e-05		PTRF	KRAS	1.20163	0.00283414		ATP2B4	HRAS	-1.58496	0.0372824
HLA-C	HRAS	-2.848	0.000811521		CDK14	KRAS	1.20645	0.00414657		ATP5L	HRAS	-1.17834	0.0134
NPC1	HRAS	-2.80735	0.00143953		PRR5	KRAS	1.20645	0.00071475		B2M	HRAS	-3.45943	0.000998613
NPTN	HRAS	-2.80735	0.00143953		NDUFS3	KRAS	1.21412	0.00975329		BAIAP2L1	HRAS	-1.08873	0.000598391
PVRL3	HRAS	-2.80735	0.00143953		WASF2	KRAS	1.23816	3.54653e-05		BASP1	HRAS	-1.79796	5.01959e-05
SLC1A1	HRAS	-2.80735	0.014466		KIAA0195	KRAS	1.23879	0.000513401		BRK1	HRAS	-1.51457	0.00352265
TIMM13	HRAS	-2.67807	0.011696		PHF6	KRAS	1.24793	0.00734397		BSG	HRAS	-1.8365	0.000606636
APOBEC3C	HRAS	-2.58496	0.0195086		PANX1	KRAS	1.2783	0.00028919		BTN3A1	HRAS	-4.70044	0.000332137
RAP2A	HRAS	-2.58496	0.000248665		AKAP5	KRAS	1.34239	0.00809796		C12orf75	HRAS	-4.39232	0.00154742
SNX17	HRAS	-2.56071	0.00226317		SPCS3	KRAS	1.34792	0.00327506		C14orf133	HRAS	-2.48543	0.00369202
COX4I1	HRAS	-2.53605	0.000964535		MSN	KRAS	1.35364	0.00115501		C15orf38	HRAS	-8.01123	1.8141e-06
CLDN1	HRAS	-2.51457	0.00134099		ADCY6	KRAS	1.35364	0.0319329		C19orf70	HRAS	-5.67243	7.99378e-05
SEC61A1	HRAS	-2.50901	0.00162186		RIOK2	KRAS	1.36257	0.0423894		C1orf198	HRAS	-2.9558	8.78573e-06
ANTXR1	HRAS	-2.5025	0.000423483		C11orf2	KRAS	1.36257	0.00354786		C1QBP	HRAS	-1.11507	0.000289719
C19orf70	HRAS	-2.5025	0.000343432		YWHAZ	KRAS	1.37281	0.00134505		C7orf59	HRAS	-2.08746	0.0197404
SLC23A2	HRAS	-2.48543	0.000175241		FMNL3	KRAS	1.38702	0.0125746		C8orf42	HRAS	-1.974	0.00134115
CALU	HRAS	-2.39232	0.0334798		SPRED2	KRAS	1.41504	0.0108604		CADM1	HRAS	-1.19931	0.000185105
GALK1	HRAS	-2.34577	0.00202662		KIAA0754	KRAS	1.41504	0.0432703		CALU	HRAS	-4.39232	0.0145526
NAPA	HRAS	-2.32193	1.66786e-06		HMOX2	KRAS	1.42321	0.0103106		CAV1	HRAS	-1.03847	0.00208317
SH3GL3	HRAS	-2.32193	0.000257198		SLC29A2	KRAS	1.44057	0.0321045		CCDC8	HRAS	-2.61891	6.28013e-05
SLC19A2	HRAS	-2.32193	0.00104547		ECE1	KRAS	1.44057	0.0407674		CCNY	HRAS	-1.58496	0.0385586
UQCRB	HRAS	-2.32193	0.00131073		YWHAB	KRAS	1.44876	0.0183504		CD276	HRAS	-1	0.00414657
F11R	HRAS	-2.30581	6.21296e-05		BTN3A3	KRAS	1.45943	0.0203118		CD99	HRAS	-1.12776	0.00231149
ATP5L	HRAS	-2.25634	0.00129904		DNAJB11	KRAS	1.48543	0.011696		CDC42	HRAS	-1.12928	0.000420266
DLD	HRAS	-2.25634	0.000110087		CDH2	KRAS	1.49476	0.00131073		CDC42EP3	HRAS	-5	0.00335656
UBE2M	HRAS	-2.16993	0.000938911		MOSPD2	KRAS	1.5025	0.0371309		CDC42EP4	HRAS	-1.74769	2.92535e-06
C1orf198	HRAS	-2.14136	4.57026e-05		WASF1	KRAS	1.51457	0.0229161		CDH2	HRAS	-1.03242	0.0336239
ADIPOR1	HRAS	-2.13993	4.04688e-05		NF1	KRAS	1.51457	0.00334328		CDK14	HRAS	-2.83872	9.86334e-06
VAMP4	HRAS	-2.12928	6.68544e-05		ARAP2	KRAS	1.52356	0.0372461		CFL2	HRAS	-6.10852	4.17022e-06
EPB41L4B	HRAS	-2.11839	8.55182e-05		RRAGC	KRAS	1.53605	0.00220302		CHMP5	HRAS	-2.61626	3.48206e-05
RDX	HRAS	-2.09803	0.000459234		RAB11B	KRAS	1.55552	0.0147544		CHMP6	HRAS	-3.18587	3.61858e-05
JAM3	HRAS	-2.06609	7.02393e-05		IQGAP2	KRAS	1.61005	0.00549926		CIRBP	HRAS	-1.39232	7.30169e-05
CNN3	HRAS	-2.05063	2.91717e-05		LRP6	KRAS	1.67807	0.0477774		CLCN7	HRAS	-2.32193	3.80183e-06
STX3	HRAS	-2.04731	0.0010623		PIGU	KRAS	1.68806	0.0145526		CMIP	HRAS	-3.58496	3.35537e-05
CMIP	HRAS	-2	0.00692005		PCDH9	KRAS	1.78427	0.00734397		CNN2	HRAS	-1.58496	0.000311257
RALA	HRAS	-2	0.0100492		AGPAT6	KRAS	1.78427	0.0160717		CNN3	HRAS	-2.03355	5.35655e-05
UBIAD1	HRAS	-2	0.0008632		ZFYVE16	KRAS	1.80386	4.62128e-05		CNP	HRAS	-1.14405	0.000386814
TAGLN2	HRAS	-1.96331	6.47135e-08		COX4NB	KRAS	1.80735	0.0400578		CORO1C	HRAS	-1.11915	0.00031011
PSEN1	HRAS	-1.95936	0.000289387		TRIM13	KRAS	1.84327	7.63341e-05		COX4I1	HRAS	-4.85798	0.000257198
UBE2N	HRAS	-1.9542	0.00104782		KIAA0319L	KRAS	1.848	0.008905		COX7A2	HRAS	-3.16993	0.00412316
MTFP1	HRAS	-1.926	0.00376031		MARCKSL1	KRAS	1.85244	0.00268642		CPNE3	HRAS	-1.60881	0.00670343
CNN2	HRAS	-1.922	1.69653e-05		TMX1	KRAS	1.87447	0.00927525		CTNNA1	HRAS	-1.0665	0.00103047
STX4	HRAS	-1.90689	0.000762182		OTUD7B	KRAS	1.87447	0.00645806		CUL1	HRAS	-1.58496	6.10292e-05
MAD2L1	HRAS	-1.88753	0.000217428		SLC30A9	KRAS	1.87447	0.0134		CXADR	HRAS	-1.28011	6.08465e-05
SRSF2	HRAS	-1.88753	3.87305e-05		PARVA	KRAS	1.89308	0.0123946		DAG1	HRAS	-1.02308	0.00104547
VPS33A	HRAS	-1.87971	1.06952e-05		LRPPRC	KRAS	1.89308	2.92423e-06		DBNL	HRAS	-2.08746	3.39847e-06
BASP1	HRAS	-1.86507	0.000312772		TNFRSF10B	KRAS	1.89812	0.000998613		DHX30	HRAS	-1.13191	0.0039241
PTPRF	HRAS	-1.8625	0.000887157		DAB2	KRAS	2	0.0150107		DLD	HRAS	-1.67138	0.00100797
SPTAN1	HRAS	-1.84976	0.0266211		FAM125A	KRAS	2	0.00182012		DNAJA2	HRAS	-1.43494	2.22536e-05
NEBL	HRAS	-1.84503	1.91303e-05		PTPRA	KRAS	2.05889	0.00695513		DNAJB6	HRAS	-1.20163	0.0444798
NOP58	HRAS	-1.82045	2.36542e-05		C7orf59	KRAS	2.08746	0.00208317		DOLPP1	HRAS	-2.63227	5.5668e-05
VAMP8	HRAS	-1.81816	0.000766756		RSPRY1	KRAS	2.08746	0.00208317		DYNLL1	HRAS	-5.24793	0.00117397
ZDHHC20	HRAS	-1.81497	0.000550564		MACF1	KRAS	2.30485	0.00567826		DYNLRB2	HRAS	-2	0.0385586
CANT1	HRAS	-1.80735	0.00023792		GNAI2	KRAS	2.32193	0.01669		EFNB3	HRAS	-1.30166	0.000997365
GOPC	HRAS	-1.80735	0.00327813		KCTD12	KRAS	2.32193	0.000423483		FAM125A	HRAS	-2.86507	0.00223892
SLC38A2	HRAS	-1.79168	3.3681e-09		DENND3	KRAS	2.32193	0.00645806		FBXO17	HRAS	-2.28011	0.00601273
ROR1	HRAS	-1.73697	0.00207474		VPS37B	KRAS	2.39232	0.00250901		FERMT1	HRAS	-1.48543	0.0358958
DNAJB6	HRAS	-1.71621	0.0254739		FMNL2	KRAS	2.4021	0.00823735		FERMT2	HRAS	-1.01687	1.03811e-05
NIPSNAP1	HRAS	-1.70044	0.0240082		LPGAT1	KRAS	2.41504	0.00677111		FMNL2	HRAS	-2.09954	0.0157802
STK11	HRAS	-1.6939	0.00213703		INF2	KRAS	2.43296	6.9754e-05		FNBP1L	HRAS	-1.97199	0.0089678
NDRG1	HRAS	-1.6933	2.61032e-07		PRDX5	KRAS	2.45943	0.000606636		GALK1	HRAS	-3.60881	0.00107099
STXBP1	HRAS	-1.68806	0.000866343		ARL6IP5	KRAS	2.46949	0.00153493		GARS	HRAS	-3.97728	0.000189344
CPNE8	HRAS	-1.68675	3.99086e-07		IPO5	KRAS	2.48239	0.000539772		GDI2	HRAS	-1.90378	0.00396395
CSRP2	HRAS	-1.68589	0.000227815		SLC30A4	KRAS	2.54432	0.000103866		GIPC1	HRAS	-1.81399	0.000270162
CUL1	HRAS	-1.6845	7.4517e-05		STARD3	KRAS	2.58496	0.00358107		HBXIP	HRAS	-1.05063	0.00743446
MB21D2	HRAS	-1.67807	0.000186796		VMP1	KRAS	2.58496	0.000332137		HIGD1A	HRAS	-4.24793	0.000433002
ATP2B4	HRAS	-1.66742	0.0331161		MIF	KRAS	2.63227	0.000289387		HSD17B4	HRAS	-1.17688	0.00210818
AIDA	HRAS	-1.66297	0.00334328		ZFYVE9	KRAS	2.65208	0.000593602		HYOU1	HRAS	-2.2854	0.00136419
CORO1C	HRAS	-1.65711	5.55419e-06		MBP	KRAS	2.70044	0.00121036		IL1RAP	HRAS	-1.87447	0.00271368
ABCE1	HRAS	-1.654	4.60165e-05		CDC37	KRAS	2.7425	3.25404e-07		ITPA	HRAS	-3.54432	1.14454e-06
NDUFAF2	HRAS	-1.65208	7.29465e-05		PKN1	KRAS	2.80735	0.00441696		JAG2	HRAS	-1.44746	0.0149242
PLEKHA2	HRAS	-1.65208	0.00163685		NUDT1	KRAS	2.80735	0.000146543		JAM2	HRAS	-2.32193	0.000311257
SNX3	HRAS	-1.64386	5.24717e-05		LAMTOR2	KRAS	2.90689	0.000453422		JAM3	HRAS	-1.63982	0.000489785
FERMT1	HRAS	-1.63743	0.0349067		SLC7A6	KRAS	3	6.13523e-05		KIAA1609	HRAS	-1.152	0.00387364
CDK14	HRAS	-1.63227	3.41405e-05		ITPA	KRAS	3.05889	0.000362987		LAMTOR1	HRAS	-1.05445	0.00162945
LDHA	HRAS	-1.59826	4.65486e-06		SNX27	KRAS	3.16993	0.00244715		LAMTOR2	HRAS	-3.77259	3.37518e-05
YKT6	HRAS	-1.58877	4.83596e-06		SPCS2	KRAS	3.16993	0.000324975		LARS	HRAS	-1.20221	3.50173e-05
FNBP1L	HRAS	-1.58496	0.00997309		MCM2	KRAS	3.23266	0.000273246		LASP1	HRAS	-3.7866	4.444e-05
JAG2	HRAS	-1.58496	0.0139717		NUDCD2	KRAS	3.32193	0.000162217		LDHA	HRAS	-1.41063	1.18402e-05
PHGDH	HRAS	-1.55849	2.69266e-06		GNS	KRAS	3.39232	0.0014293		LOC101060252	HRAS	-1.63472	7.80735e-06
RAB21	HRAS	-1.55639	0.000339876		ATP6V0A2	KRAS	3.45943	0.00245234		LYPLA2	HRAS	-1.02584	0.0171852
USP46	HRAS	-1.55459	0.000141061		NOP16	KRAS	3.54432	0.000203465		MAD2L1	HRAS	-2.03953	0.0025786
PLSCR3	HRAS	-1.55141	8.28223e-06		ADI1	KRAS	3.58496	0.00121036		MAP4K5	HRAS	-1.28688	0.000353358
MET	HRAS	-1.5502	5.07112e-05		TBC1D23	KRAS	3.58496	0.00121036		MARCKSL1	HRAS	-2.47393	5.49248e-05
PDE6D	HRAS	-1.53051	0.0114039		FAM49B	KRAS	3.80735	1.27601e-05		MBP	HRAS	-4.08746	0.000410882
EFNB3	HRAS	-1.51847	4.52426e-05		VEZT	KRAS	3.80735	0.00491082		MET	HRAS	-2	4.60946e-05
SLC5A3	HRAS	-1.51019	0.000747286		KALRN	KRAS	4	0.00245234		MFAP3	HRAS	-1.76553	0.00418111
SNX6	HRAS	-1.50901	0.014908		P4HB	KRAS	4.08746	0.00465921		MFSD8	HRAS	-3.80735	0.00491082
YWHAH	HRAS	-1.50696	0.000204233		STK11IP	KRAS	4.08746	0.00131073		MPP5	HRAS	-2.32193	0.00124264
CCT6A	HRAS	-1.4975	4.90524e-06		BID	KRAS	4.16993	0.00129904		MPP6	HRAS	-1.21412	0.000592135
STX6	HRAS	-1.49596	0.00851062		VPS35	KRAS	4.20945	0.000423483		MSN	HRAS	-1	0.00370451
RAB12	HRAS	-1.49476	0.0145526		FKBP8	KRAS	4.24793	2.97944e-06		MTFP1	HRAS	-4.24793	0.000433002
ALDH1B1	HRAS	-1.48543	0.00370451		MGST3	KRAS	4.24793	0.000105271		MTHFD1L	HRAS	-1.58496	0.00743446
CHMP2B	HRAS	-1.48543	0.00692005		SSR1	KRAS	4.45943	0.000423483		MTMR12	HRAS	-2.29278	0.00162399
GIPC1	HRAS	-1.48278	0.000631569		PLEKHO2	KRAS	4.52356	0.00361186		MTMR14	HRAS	-1.45943	0.00244715
DIP2A	HRAS	-1.47805	0.00582141		TDRKH	KRAS	4.58496	2.01965e-05		NAPA	HRAS	-1.73697	0.00011354
TC2N	HRAS	-1.46395	0.000208494		NEDD4L	KRAS	4.70044	0.0104199		NCS1	HRAS	-1.34792	0.000550564
HSD17B12	HRAS	-1.44961	2.04801e-06		DAZAP1	KRAS	4.78136	1.31506e-06		NDUFA5	HRAS	-5.2854	6.18255e-06
MPZL1	HRAS	-1.43539	0.00120812		PGD	KRAS	5.93074	8.68273e-06		NDUFAF2	HRAS	-1.92338	5.00392e-05
RASA3	HRAS	-1.43296	0.00578056		F11R	Neutral	-1.47393	NS		NDUFS2	HRAS	-1.14543	0.00245234
HLA-A	HRAS	-1.42853	4.77054e-05		ACTA1	Neutral	-1.33342	NS		NDUFS3	HRAS	-1.79909	0.00665913
BRK1	HRAS	-1.41504	0.00111222		ITGB5	Neutral	-1.32193	NS		NEBL	HRAS	-2.89947	4.4217e-07
SRP9	HRAS	-1.41504	0.000103383		STXBP5	Neutral	-1.28951	NS		NEDD4L	HRAS	-5.49185	0.00361186
BAIAP2L1	HRAS	-1.41335	0.000137956		SLC26A6	Neutral	-1.28011	NS		NIPSNAP1	HRAS	-1.11548	0.0319329
FERMT2	HRAS	-1.40637	1.62516e-06		PTDSS1	Neutral	-1.24793	NS		NOLC1	HRAS	-1.42626	0.000858184
UQCRFS1	HRAS	-1.39855	0.0174572		SLC7A11	Neutral	-1.12199	NS		NOP58	HRAS	-2.08964	6.8194e-06
MBP	HRAS	-1.38702	0.0043586		EBAG9	Neutral	-1.05889	NS		NPC1	HRAS	-3.80735	0.000499727
CNP	HRAS	-1.37851	0.000191323		PARD6B	Neutral	-0.973528	0.0124744		NUDCD2	HRAS	-3.16993	0.00231149
SRC	HRAS	-1.37281	1.11619e-06		CDIPT	Neutral	-0.965235	0.00648392		OAT	HRAS	-1.19265	0.0127758
ATP5B	HRAS	-1.37242	3.69107e-05		ARHGAP12	Neutral	-0.95109	NS		OCLN	HRAS	-1.29083	0.000231692
CHMP5	HRAS	-1.37233	0.000110696		RFTN1	Neutral	-0.931287	0.00915807		OTUD7B	HRAS	-1.87447	0.00645806
BSG	HRAS	-1.37084	0.031898		ALDH18A1	Neutral	-0.930366	1.19201e-05		PACSIN3	HRAS	-1.64386	0.0189703
RAB23	HRAS	-1.37084	7.67544e-06		MCM7	Neutral	-0.928783	0.000110646		PAG1	HRAS	-1.03171	0.0174432
MAP4K5	HRAS	-1.37002	7.74074e-06		SEPT8	Neutral	-0.92785	0.0144723		PALM	HRAS	-1.10046	0.000320783
ATP1A1	HRAS	-1.36972	0.000351784		ATAD3A	Neutral	-0.925999	0.00119183		PALM2	HRAS	-1.2854	3.81897e-05
MAP2K1	HRAS	-1.36565	0.00117332		ALDH1B1	Neutral	-0.925999	NS		PANX1	HRAS	-1.36427	0.00364197
TMEM2	HRAS	-1.36351	1.23733e-05		GAPDH	Neutral	-0.922891	0.00141619		PARVA	HRAS	-2.36257	0.000728011
PODXL	HRAS	-1.36257	0.0423894		UNC5B	Neutral	-0.921672	0.000224829		PCDH9	HRAS	-2.73697	9.38084e-07
CBY1	HRAS	-1.35364	0.0106347		CDK5	Neutral	-0.915608	0.0236424		PCNA	HRAS	-1.20945	0.00301078
PPFIBP1	HRAS	-1.35267	0.0372832		FAM135A	Neutral	-0.913843	NS		PDAP1	HRAS	-1.074	0.00325669
VAMP2	HRAS	-1.35147	0.0218075		KIDINS220	Neutral	-0.899836	0.00647768		PDCD6IP	HRAS	-1.09954	0.00237354
NCS1	HRAS	-1.34792	7.51226e-05		FCHO2	Neutral	-0.897314	0.00165523		PDE6D	HRAS	-1.37851	0.043422
PVRL2	HRAS	-1.34032	2.28133e-07		UQCRC2	Neutral	-0.894067	0.00225106		PELO	HRAS	-1.63227	0.00971603
EFNB2	HRAS	-1.3328	3.43099e-07		FAM83B	Neutral	-0.891187	0.0143657		PGRMC1	HRAS	-2.31194	3.24065e-06
PRKCI	HRAS	-1.33162	4.07556e-06		C19orf26	Neutral	-0.890376	0.00182012		PHF6	HRAS	-1.45943	0.0117095
HYOU1	HRAS	-1.33121	0.00511253		SLC6A6	Neutral	-0.887525	0.00414657		PHGDH	HRAS	-1.32862	2.23603e-05
BET1	HRAS	-1.32193	0.0123664		ITGA2	Neutral	-0.87376	0.000368786		PITPNB	HRAS	-3.80735	0.000499727
BET1L	HRAS	-1.32193	0.00215034		LLGL1	Neutral	-0.872331	0.000940542		PKM2	HRAS	-1.35832	1.25829e-05
JAM2	HRAS	-1.32193	0.00143953		SLC4A7	Neutral	-0.870685	0.000147107		PLCB1	HRAS	-1.15754	0.000104531
ATP1B1	HRAS	-1.31366	0.00283414		PARD3B	Neutral	-0.862496	NS		PLEKHA2	HRAS	-1.28951	0.0197404
YES1	HRAS	-1.30899	9.89933e-07		ADIPOR1	Neutral	-0.859822	0.0477774		PLSCR3	HRAS	-4.82443	1.11062e-06
PRMT5	HRAS	-1.30855	0.00101808		PIP5K1A	Neutral	-0.859137	0.00900689		PODXL	HRAS	-1.58496	0.0150107
TYMS	HRAS	-1.30256	3.35537e-05		HLA-A	Neutral	-0.857607	0.00727549		PPAP2B	HRAS	-1.152	0.0186539
LOC101060252	HRAS	-1.29768	0.000798039		ENO1	Neutral	-0.852095	2.22857e-05		PPP2CA	HRAS	-1.30933	0.000671348
VAT1	HRAS	-1.29662	0.000791223		ABCD3	Neutral	-0.842209	0.00023689		PSEN1	HRAS	-3.54432	6.50615e-05
GORASP2	HRAS	-1.29278	0.00531886		AP3M1	Neutral	-0.84022	0.00913538		PSTPIP2	HRAS	-1.61566	0.000140223
WDR20	HRAS	-1.28951	2.67886e-05		PEAK1	Neutral	-0.835613	0.00456709		PTPRA	HRAS	-1.73697	0.0117095
ITGA3	HRAS	-1.2854	0.00170913		MARK1	Neutral	-0.83399	NS		PTPRF	HRAS	-2.32193	0.000321512
EFHD2	HRAS	-1.28473	7.70563e-05		MARK3	Neutral	-0.819151	0.00526516		PVRL2	HRAS	-1.12807	5.66458e-05
MFAP3	HRAS	-1.28011	0.00457127		DPM1	Neutral	-0.817797	0.0347858		PVRL3	HRAS	-2.22239	0.00265854
GDI2	HRAS	-1.27302	0.0126723		PHLDB2	Neutral	-0.815575	NS		RAB11FIP2	HRAS	-2.822	9.18801e-05
SLC9A3R1	HRAS	-1.27302	0.013894		CDK16	Neutral	-0.814444	0.0139907		RAB12	HRAS	-1.25376	0.011696
WASF2	HRAS	-1.27085	4.75335e-06		OCIAD1	Neutral	-0.814444	NS		RAB21	HRAS	-1.73697	0.000495785
DBNL	HRAS	-1.26149	3.62556e-07		DLG1	Neutral	-0.814152	NS		RAB23	HRAS	-1.62396	7.1318e-06
PKM2	HRAS	-1.2543	2.11574e-05		MTPAP	Neutral	-0.807355	NS		RAB34	HRAS	-1.14886	0.00861833
ABL2	HRAS	-1.25376	0.011696		MICALL1	Neutral	-0.795859	0.0032736		RAB9A	HRAS	-1.36565	0.00314104
DOLPP1	HRAS	-1.25376	0.0311734		ARHGAP21	Neutral	-0.795382	0.00314255		RALGPS2	HRAS	-2.2854	0.000352485
ATAD3A	HRAS	-1.25096	0.00982871		MTM1	Neutral	-0.793549	NS		RAP2A	HRAS	-4.90689	4.72845e-05
CCT4	HRAS	-1.24948	3.05759e-05		SEPT10	Neutral	-0.793549	0.0423894		RASA3	HRAS	-1.23133	0.0172131
SLC7A1	HRAS	-1.24286	0.00237077		ATP5A1	Neutral	-0.793	4.80564e-06		RCN2	HRAS	-4.32193	0.00240747
C14orf133	HRAS	-1.22239	0.0485331		CPNE8	Neutral	-0.789162	0.00502082		RDX	HRAS	-2.70571	5.46343e-05
FDFT1	HRAS	-1.22239	0.0201226		TBC1D22B	Neutral	-0.788496	NS		RELL1	HRAS	-1.15024	0.000137326
EPS15L1	HRAS	-1.21813	0.00381404		ATP5B	Neutral	-0.787455	0.000678038		RGS7	HRAS	-2.37851	0.0215216
SLC1A5	HRAS	-1.21547	4.41389e-07		PTPRJ	Neutral	-0.784271	NS		RHBDF2	HRAS	-1.09954	0.0077312
CLCN7	HRAS	-1.20847	4.72807e-05		DOCK7	Neutral	-0.782409	0.00222211		RHOG	HRAS	-1.22239	0.0240082
RALGPS2	HRAS	-1.19794	0.00185767		PTPN14	Neutral	-0.78136	0.0419466		RRAGA	HRAS	-6.14975	5.03896e-05
TIMM23	HRAS	-1.19794	0.00587829		SLC6A8	Neutral	-0.778786	NS		RSPRY1	HRAS	-2.39232	0.0214793
CXADR	HRAS	-1.19522	3.53061e-05		LCLAT1	Neutral	-0.777608	0.0169647		S100A11	HRAS	-6.61471	6.27772e-06
DHX30	HRAS	-1.19465	0.00257987		VDAC3	Neutral	-0.772278	0.00117918		SCAMP1	HRAS	-1.0686	1.69847e-06
SLC39A14	HRAS	-1.18763	0.00399546		CD44	Neutral	-0.768674	0.023495		SEC61A1	HRAS	-4.20945	0.000530109
ECI2	HRAS	-1.18442	0.0259278		VAPA	Neutral	-0.765535	0.00204519		SH3GL1	HRAS	-1.42321	1.28084e-05
DRG1	HRAS	-1.18161	0.000526952		PPP1R16B	Neutral	-0.765535	NS		SH3GL3	HRAS	-4.12928	6.42075e-07
RAB10	HRAS	-1.18057	0.0176289		ITGA7	Neutral	-0.762501	0.00865504		SHB	HRAS	-1.1375	0.00127588
AHCYL1	HRAS	-1.17982	1.53703e-05		SLC29A1	Neutral	-0.762308	0.00280089		SLC19A2	HRAS	-2	0.00245234
COX7A2	HRAS	-1.16993	0.030766		PAK4	Neutral	-0.749457	0.000674275		SLC1A1	HRAS	-3.39232	0.011201
CTDSP1	HRAS	-1.16993	0.00172906		CSNK1A1	Neutral	-0.747234	0.0016228		SLC22A5	HRAS	-1.07039	0.00306358
SLC22A5	HRAS	-1.16993	0.00510751		RAB10	Neutral	-0.736966	NS		SLC23A2	HRAS	-2.63743	0.000109625
MCM6	HRAS	-1.16581	2.37741e-05		USP6NL	Neutral	-0.736966	0.00637464		SLC38A2	HRAS	-1.91832	6.61266e-10
OCLN	HRAS	-1.16357	1.03478e-06		CHMP2B	Neutral	-0.736966	NS		SLC5A3	HRAS	-1.23266	0.00149227
SLC3A2	HRAS	-1.15791	0.0363868		DHCR7	Neutral	-0.736966	0.0400578		SLC9A3R1	HRAS	-3.05063	0.00185016
MTMR12	HRAS	-1.15528	0.00839008		DLGAP4	Neutral	-0.736966	NS		SLC9A3R2	HRAS	-1.47805	0.0055875
TECR	HRAS	-1.15433	0.00299993		CASK	Neutral	-0.733008	0.00519051		SLCO4C1	HRAS	-4.45943	0.00320671
STX12	HRAS	-1.15116	0.000104305		SLC12A2	Neutral	-0.727613	0.00159796		SNAP25	HRAS	-1.77578	9.90834e-05
ENO1	HRAS	-1.15087	4.73267e-06		STEAP3	Neutral	-0.722853	3.56173e-05		SNX12	HRAS	-4.02975	0.000697742
FAM92A1	HRAS	-1.14202	0.0113176		TBC1D10B	Neutral	-0.720846	0.0290074		SNX17	HRAS	-3.88264	0.00116517
LYN	HRAS	-1.13471	8.21698e-05		ERBB2IP	Neutral	-0.718849	NS		SNX27	HRAS	-1.94753	0.00154742
CTTN	HRAS	-1.13164	0.000100718		CYFIP1	Neutral	-0.716928	0.000445077		SNX3	HRAS	-1.32193	7.45133e-05
ACAP2	HRAS	-1.12928	0.0204913		CLNS1A	Neutral	-0.703018	4.89606e-05		SNX6	HRAS	-2.50901	0.00607217
TCP1	HRAS	-1.12663	2.59128e-06		C2CD4C	Neutral	-0.702614	0.0265902		SPCS2	HRAS	-2.80735	0.00917222
LLGL1	HRAS	-1.12161	0.000163494		NOTCH2	Neutral	-0.701919	0.000919469		SPRED2	HRAS	-1.63743	0.00240747
SNX2	HRAS	-1.11366	0.00330716		ITGA3	Neutral	-0.70044	0.0101755		SRC	HRAS	-1.0833	1.14454e-06
TBC1D10A	HRAS	-1.10692	0.000159643		ROBO1	Neutral	-0.694374	0.00156116		SRP9	HRAS	-1.41504	0.000103383
CCDC8	HRAS	-1.10434	0.0419466		SLC1A3	Neutral	-0.693161	0.0242647		SRSF2	HRAS	-2.20945	7.02493e-05
CD44	HRAS	-1.10309	0.00361079		ZDHHC14	Neutral	-0.691878	NS		STEAP2	HRAS	-1.60486	0.000807143
CCT3	HRAS	-1.1006	3.83285e-05		NUMBL	Neutral	-0.678072	0.00288197		STK11	HRAS	-1.2578	0.00465921
C1orf21	HRAS	-1.09954	0.00153199		RAB27B	Neutral	-0.678072	NS		STON1	HRAS	-1.61298	0.00638286
STX7	HRAS	-1.09761	0.000103229		SLC9B2	Neutral	-0.678072	NS		STX10	HRAS	-1.09954	0.00231936
DDOST	HRAS	-1.09558	0.00113514		SEPT7	Neutral	-0.675728	0.0130387		STX12	HRAS	-1.4689	2.47407e-05
SLC6A9	HRAS	-1.09311	0.000794535		ATP5J2-PTCD1	Neutral	-0.673772	0.00353168		STX3	HRAS	-3.36923	4.4812e-05
RELL1	HRAS	-1.09276	3.69369e-05		ZDHHC5	Neutral	-0.670692	0.0101581		STX4	HRAS	-2.49185	3.66478e-05
MTHFD1	HRAS	-1.09163	7.13206e-05		PLEKHA1	Neutral	-0.667804	0.000585144		STX6	HRAS	-2.02647	0.00339072
PARD6B	HRAS	-1.07662	4.6026e-05		SLC25A6	Neutral	-0.665581	0.049475		STX7	HRAS	-1.83458	5.2176e-06
GAB1	HRAS	-1.07577	8.7302e-06		STT3A	Neutral	-0.658963	0.00387364		STXBP1	HRAS	-1.68806	0.000744768
YWHAZ	HRAS	-1.06289	0.000319417		KIAA1804	Neutral	-0.657112	NS		TAGLN2	HRAS	-1.672	2.68513e-07
CDCA3	HRAS	-1.06088	0.000201809		C1orf21	Neutral	-0.652077	NS		TBC1D10A	HRAS	-2	3.00509e-06
NDUFS2	HRAS	-1.06054	0.00240747		CBY1	Neutral	-0.63743	NS		TC2N	HRAS	-1.46395	0.000451092
TMED10	HRAS	-1.05889	0.0139069		PPFIA1	Neutral	-0.634351	0.0169358		TIAM1	HRAS	-1.13465	0.0139574
PDAP1	HRAS	-1.05514	0.00165346		LPHN1	Neutral	-0.633218	NS		TIMM13	HRAS	-1.67807	0.0277391
WDR48	HRAS	-1.05247	0.0186936		TMEM2	Neutral	-0.631996	0.00158534		TIMM23	HRAS	-1.89308	0.000401213
PFN1	HRAS	-1.05184	0.000943752		SLC7A2	Neutral	-0.629481	0.00260993		TIMM44	HRAS	-3.04439	0.000856867
FRS2	HRAS	-1.05123	0.000428334		MLLT4	Neutral	-0.62875	0.00112662		TMED10	HRAS	-1.18442	0.0106347
DDX3X	HRAS	-1.05082	5.40613e-05		RAF1	Neutral	-0.626957	7.0716e-05		TNFRSF10B	HRAS	-1.58496	0.0181265
ANKRD26	HRAS	-1.05063	0.00415325		ABI1	Neutral	-0.623233	0.00901877		TOMM6	HRAS	-4.08746	0.00271368
ARF6	HRAS	-1.03847	0.000746145		NCKAP1	Neutral	-0.621488	0.00201613		TYMS	HRAS	-3.62449	2.64959e-06
LARS	HRAS	-1.03824	1.89975e-06		GPRIN1	Neutral	-0.619728	NS		UBE2M	HRAS	-3.29546	0.000523329
C8orf42	HRAS	-1.02647	0.00207474		EPN2	Neutral	-0.616671	NS		UBE2N	HRAS	-1.31034	0.00185503
PICALM	HRAS	-1.01886	0.00184579		NDUFA12	Neutral	-0.616671	NS		UBE2V1	HRAS	-3.58496	3.35537e-05
PLEKHA1	HRAS	-1.01527	5.41306e-05		IGSF3	Neutral	-0.614346	0.0242095		UNC5C	HRAS	-1.46173	0.00116561
TULP3	HRAS	-1.01197	0.000757897		CCT4	Neutral	-0.614109	0.00556082		UQCRB	HRAS	-3.32193	0.000105271
HN1L	HRAS	-1.00866	0.000880654		APBB2	Neutral	-0.612977	NS		UQCRFS1	HRAS	-4.85798	0.00207474
CORO1B	HRAS	-1.00518	1.54454e-05		ANKRD50	Neutral	-0.606658	0.0122934		VAMP2	HRAS	-1.41938	0.0182467
AIFM1	HRAS	-1	0.0385586		SCRIB	Neutral	-0.60311	0.00140414		VAMP4	HRAS	-2.32193	2.51898e-06
ANXA2	HRAS	-1	4.21813e-06		PFKP	Neutral	-0.601451	0.00985258		VAMP7	HRAS	-1.04439	0.00607054
OAT	HRAS	-1	0.0155909		NDUFA9	Neutral	-0.597241	0.00154742		VAMP8	HRAS	-1.3112	0.000730315
PDE8A	HRAS	-1	0.0114039		RAI14	Neutral	-0.59561	0.0272458		VAT1	HRAS	-1.17632	0.000351833
UBE2V1	HRAS	-1	0.0321045		TTC7B	Neutral	-0.592825	0.000601085		VPS33A	HRAS	-4.9386	8.07165e-07
SCAMP1	HRAS	-0.99554	3.79814e-05		FRS2	Neutral	-0.590745	0.014643		VPS37B	HRAS	-3.49185	0.00670343
BID	KRAS	1	0.0240082		PHACTR4	Neutral	-0.584963	0.00110564		VTI1B	HRAS	-1.10692	5.53024e-06
ODZ3	KRAS	1.03715	0.00645916		USP46	Neutral	-0.584963	0.0243721		WASF2	HRAS	-2.50901	7.91493e-07
ADCY9	KRAS	1.03882	0.000412639		NAPA	Neutral	-0.584963	NS		WDR41	HRAS	-1.63421	3.59259e-05
SLC12A6	KRAS	1.04731	0.0300197		SLC39A14	Neutral	-0.584963	NS		YKT6	HRAS	-1.55041	1.48352e-06
PTPRG	KRAS	1.04793	0.000600654		KCNQ5	Neutral	-0.584963	NS		YWHAB	HRAS	-1.97046	0.000370698
IQGAP2	KRAS	1.05063	0.0120427		CSPG4	Neutral	-0.565597	0.0321045		YWHAG	HRAS	-1.34483	0.00114158
NISCH	KRAS	1.05184	0.00269984		SEPT6	Neutral	-0.563429	0.0242095		YWHAH	HRAS	-2.94753	1.50462e-05
C1orf172	KRAS	1.06413	0.0498253		YES1	Neutral	-0.563332	0.00795864		YWHAZ	HRAS	-2.4357	9.34916e-06
RTCD1	KRAS	1.06413	0.0498253		BRAF	Neutral	-0.558731	0.0243123		ZDHHC20	HRAS	-1.7625	0.000675799
PGRMC2	KRAS	1.0983	0.000276693		PDZD11	Neutral	-0.554968	NS		ZFYVE16	HRAS	-2.03622	3.52404e-06
SRM	KRAS	1.11548	0.00935301		SEPT2	Neutral	-0.554396	NS		ZFYVE9	HRAS	-2.58496	0.00335717
DHFR	KRAS	1.12102	0.00511253		USP31	Neutral	-0.550197	0.0262386		AASS	Neutral	-0.736966	NS
FLOT1	KRAS	1.1375	0.00902324		TRAF7	Neutral	-0.540568	NS		ABCC1	Neutral	0.561879	0.030579
DOCK9	KRAS	1.15024	0.0264232		TUFM	Neutral	-0.535596	0.00738465		ABCC5	Neutral	-0.522678	NS
OSBPL11	KRAS	1.16227	0.00677111		EPN1	Neutral	-0.530515	0.00231149		ABI1	Neutral	-0.0736229	NS
INF2	KRAS	1.16993	0.00256677		KIAA1274	Neutral	-0.525931	0.00143746		ABL2	Neutral	-0.561879	NS
CDC42BPB	KRAS	1.18442	0.021331		MRI1	Neutral	-0.523562	NS		ACSL3	Neutral	-0.669851	0.00918992
KALRN	KRAS	1.19265	0.0467712		FAM171A1	Neutral	-0.520257	0.0120487		ACTA1	Neutral	-0.344648	NS
ADCY6	KRAS	1.20163	0.00677111		SLC1A5	Neutral	-0.519028	0.000524233		ACTG1	Neutral	-0.22542	NS
DST	KRAS	1.20476	0.000283491		EFNB1	Neutral	-0.516962	0.0022077		ADAM22	Neutral	-0.5025	NS
IPO5	KRAS	1.2123	0.00667325		VAMP8	Neutral	-0.50696	NS		ADCK3	Neutral	0.473931	0.0106347
SNX27	KRAS	1.22239	0.0182367		WDR20	Neutral	-0.5025	NS		ADD1	Neutral	-0.0158105	NS
PGD	KRAS	1.2303	0.00156364		RAB8A	Neutral	-0.5025	0.0127758		ADD2	Neutral	-0.685891	0.00157224
PLXNB2	KRAS	1.26303	0.00768036		SLC25A11	Neutral	-0.500205	0.0401301		ADD3	Neutral	0.0618009	NS
ATP13A3	KRAS	1.27563	0.0485773		GAB1	Neutral	-0.4975	0.0254438		AFG3L2	Neutral	-0.430634	NS
KIAA0195	KRAS	1.29768	0.00228923		PPP1R9A	Neutral	-0.494765	NS		AGPS	Neutral	-1	NS
DOCK11	KRAS	1.34239	0.013446		RAB5C	Neutral	-0.490986	NS		AIFM1	Neutral	0.0588937	NS
PLEKHO2	KRAS	1.35364	0.0319329		DCBLD1	Neutral	-0.489385	0.00718039		AKAP12	Neutral	0.358192	NS
EPN1	KRAS	1.36257	0.000186796		PVRL1	Neutral	-0.485427	NS		AKAP5	Neutral	-0.652077	NS
ILDR2	KRAS	1.36923	0.0176289		ROR2	Neutral	-0.480762	0.0149852		ALCAM	Neutral	-0.293731	NS
PIK3R3	KRAS	1.39689	0.00729332		JUP	Neutral	-0.473931	0.00237981		ALDH18A1	Neutral	0.409763	0.000945895
C11orf2	KRAS	1.41504	0.00394169		BET1L	Neutral	-0.473931	NS		ALDH1B1	Neutral	-0.559427	NS
FKBP8	KRAS	1.44057	0.000272226		TOR1AIP1	Neutral	-0.469485	NS		AMIGO2	Neutral	-0.685891	NS
ASIC1	KRAS	1.44746	0.00438787		CASKIN2	Neutral	-0.465664	NS		ANKRD26	Neutral	0.208108	NS
CCM2	KRAS	1.45943	0.0164113		TFRC	Neutral	-0.459432	NS		ANKRD50	Neutral	0.978626	0.00497884
DAZAP1	KRAS	1.45943	0.000180502		ATP1B1	Neutral	-0.455679	NS		ANKS6	Neutral	0.473931	NS
PIK3CB	KRAS	1.46949	0.00204169		LSR	Neutral	-0.450443	NS		ANP32B	Neutral	0.535037	0.0423894
DAAM1	KRAS	1.49476	0.00648392		CTNNB1	Neutral	-0.450166	NS		ANTXR1	Neutral	-1.28011	NS
PTPN1	KRAS	1.54432	2.5284e-05		ANP32B	Neutral	-0.449307	0.0332043		APBB1	Neutral	-0.375867	NS
IQGAP1	KRAS	1.60334	4.72611e-06		PLEKHA7	Neutral	-0.449307	NS		APBB2	Neutral	0.378512	NS
TMX1	KRAS	1.65208	0.0169647		EPB41L3	Neutral	-0.448758	0.0477554		APOBEC3C	Neutral	-0.777608	NS
LRPPRC	KRAS	1.65605	0.00476275		ITGB1	Neutral	-0.443301	0.000525415		ARAF	Neutral	-0.552541	0.0437331
DAB2IP	KRAS	1.66297	0.0129004		ATAD1	Neutral	-0.440573	NS		ARF1	Neutral	-0.31034	0.00757914
TNKS1BP1	KRAS	1.66985	0.0133017		STK11	Neutral	-0.436099	NS		ARF4	Neutral	0.249359	NS
MTOR	KRAS	1.69116	3.46322e-05		SAR1B	Neutral	-0.436099	NS		ARF6	Neutral	-0.604071	0.00807406
NT5DC2	KRAS	1.70044	0.00745626		TOE1	Neutral	-0.436099	NS		ARFIP1	Neutral	-0.813231	0.00175338
C1orf43	KRAS	1.73697	0.0117095		SEPT11	Neutral	-0.432227	NS		ARHGAP5	Neutral	-0.500429	NS
PLCH1	KRAS	1.73697	0.00148914		EFNB2	Neutral	-0.42862	0.00110862		ARL13B	Neutral	-0.489805	0.0407182
AGPAT6	KRAS	1.78427	0.00734397		ROCK1	Neutral	-0.426265	NS		ARL2	Neutral	-0.784271	0.0051277
LPHN1	KRAS	1.80735	0.00355582		JAM3	Neutral	-0.426265	NS		ARVCF	Neutral	-0.294447	NS
FAM91A1	KRAS	1.81399	4.32058e-07		SCARB1	Neutral	-0.422455	0.0112611		ASIC1	Neutral	1.12553	NS
CCDC47	KRAS	1.83188	0.000527446		CAND1	Neutral	-0.41889	0.0154799		ATAD1	Neutral	0.440573	NS
CABLES1	KRAS	1.91754	0.0210931		PFKL	Neutral	-0.418226	0.00366046		ATAD3A	Neutral	-0.324962	NS
SLC29A2	KRAS	1.926	0.00679154		TMEM97	Neutral	-0.415037	NS		ATP11C	Neutral	-0.0780025	NS
NOS1AP	KRAS	2	0.0174572		GPRC5C	Neutral	-0.415037	NS		ATP13A3	Neutral	0.211504	NS
AUP1	KRAS	2.07039	0.0100492		SDK2	Neutral	-0.415037	NS		ATP1B1	Neutral	-0.857981	0.0154513
ITGA8	KRAS	2.078	0.0205559		EPHA2	Neutral	-0.407708	NS		ATP1B3	Neutral	-0.656347	0.0120072
CNNM4	KRAS	2.09516	0.000559976		PRKCI	Neutral	-0.40691	0.0328166		ATP2B1	Neutral	-0.587198	NS
MIF	KRAS	2.14684	0.000146543		CSNK1G3	Neutral	-0.403356	NS		ATP5A1	Neutral	-0.0925941	NS
AKT1	KRAS	2.16993	0.00207474		DLG3	Neutral	-0.398549	0.0474665		ATP5B	Neutral	-0.584963	0.0023147
IGF2R	KRAS	2.17834	0.000304381		CCM2	Neutral	-0.398549	NS		ATP5C1	Neutral	-0.0547925	NS
LRRC8A	KRAS	2.19265	0.0255094		WDR6	Neutral	-0.389947	0.00315786		ATP5J2-PTCD1	Neutral	-0.123735	NS
PKN1	KRAS	2.22239	0.0141101		FAM92A1	Neutral	-0.389947	NS		ATP7A	Neutral	0.0962153	NS
PLCB4	KRAS	2.24793	0.0487223		FERMT2	Neutral	-0.389491	0.0110683		ATP9A	Neutral	-0.584963	NS
MACF1	KRAS	2.30485	0.00567826		CNNM2	Neutral	-0.387023	NS		B7H6	Neutral	-0.485427	NS
GNAI2	KRAS	2.32193	0.01669		ARF1	Neutral	-0.385122	NS		BAIAP2	Neutral	-0.0606264	NS
PIK3CA	KRAS	2.32193	0.00516804		OSBPL8	Neutral	-0.381307	0.0392308		BET1	Neutral	0.137504	NS
STIM1	KRAS	2.39232	2.97882e-05		CDK1	Neutral	-0.380272	NS		BET1L	Neutral	-0.847997	0.0101755
MOSPD2	KRAS	2.5025	0.00162945		RICTOR	Neutral	-0.377305	NS		BRAF	Neutral	0.885541	0.0121104
TMEM48	KRAS	2.51785	0.00113732		MARCKS	Neutral	-0.371969	NS		C11orf67	Neutral	0.280108	NS
FARP2	KRAS	2.54432	0.000997958		MPDU1	Neutral	-0.371969	NS		C1orf21	Neutral	-0.447459	NS
RIOK2	KRAS	2.58496	0.0169647		BTN3A2	Neutral	-0.371969	NS		C1orf43	Neutral	0.874469	NS
SDK1	KRAS	2.58496	0.0163489		NDRG3	Neutral	-0.368387	NS		C2CD2L	Neutral	0.584963	NS
SULT1A1	KRAS	2.67807	1.44304e-05		SLC38A1	Neutral	-0.36257	NS		C2CD4C	Neutral	0.127112	NS
FMNL3	KRAS	2.76553	0.00233767		SNAP29	Neutral	-0.359896	NS		C2orf47	Neutral	0.63743	NS
CASKIN2	KRAS	2.80735	0.00692005		ADD1	Neutral	-0.359167	0.0222464		C8orf47	Neutral	-0.975752	0.00810598
COX4NB	KRAS	2.80735	0.014466		INSR	Neutral	-0.352302	NS		CAB39	Neutral	0.131245	NS
FAM49B	KRAS	2.80735	0.000146543		CEP89	Neutral	-0.349584	NS		CACHD1	Neutral	0.82415	0.00351797
GNS	KRAS	2.80735	0.00332583		ECI2	Neutral	-0.347923	NS		CAND1	Neutral	-0.0621217	NS
NUDT1	KRAS	2.80735	0.000146543		SLC9A1	Neutral	-0.347923	NS		CANT1	Neutral	0.192645	NS
PTGES3	KRAS	2.80735	0.00129573		ARAF	Neutral	-0.346176	NS		CANX	Neutral	-0.807355	0.00435493
SSR1	KRAS	2.87447	0.00188385		NUMB	Neutral	-0.344648	NS		CASK	Neutral	0.953206	0.00190036
MPRIP	KRAS	2.97728	0.0017719		IRS4	Neutral	-0.344511	0.025351		CBY1	Neutral	-0.716207	NS
STX5	KRAS	3.07039	1.24374e-06		ELOVL5	Neutral	-0.341037	NS		CCDC88A	Neutral	-0.556393	NS
CERS2	KRAS	3.11548	0.000165044		PCDH7	Neutral	-0.338802	0.00568581		CCT3	Neutral	-0.515641	0.000515513
STT3B	KRAS	3.16993	0.0104017		VANGL1	Neutral	-0.33613	0.0289704		CCT4	Neutral	-0.635367	3.17214e-05
THSD1	KRAS	3.16993	0.00231149		MTHFD1	Neutral	-0.336049	0.00569133		CCT6A	Neutral	-0.890082	4.28856e-05
NF1	KRAS	3.32193	1.44304e-05		NUP93	Neutral	-0.331844	NS		CD44	Neutral	-0.334419	0.0150107
TRPM4	KRAS	3.32193	0.000162217		BAIAP2L1	Neutral	-0.324622	NS		CDC42BPA	Neutral	0.660514	0.0328074
ATG9A	KRAS	3.45943	0.00245234		SNX3	Neutral	-0.321928	NS		CDC42BPB	Neutral	1.03242	NS
ATP6V0A2	KRAS	3.45943	0.00245234		SEMA4C	Neutral	-0.321928	NS		CDC42EP1	Neutral	-0.11757	NS
BTN3A3	KRAS	3.45943	0.000130707		IARS2	Neutral	-0.321928	0.0400578		CDCA3	Neutral	-0.941583	0.000282131
SLC30A9	KRAS	3.45943	0.000130707		VANGL2	Neutral	-0.318317	NS		CDK1	Neutral	-0.242361	NS
TRAF7	KRAS	3.45943	0.00245234		SLC39A6	Neutral	-0.316857	NS		CDK16	Neutral	-0.147754	NS
KCTD12	KRAS	3.54432	0.000203465		LRBA	Neutral	-0.313739	NS		CDK17	Neutral	0	NS
ADI1	KRAS	3.58496	0.00121036		CYFIP2	Neutral	-0.313467	NS		CFL1	Neutral	-0.705644	0.000179594
TBC1D23	KRAS	3.58496	0.00121036		SLC39A10	Neutral	-0.312213	0.0330425		CHMP2B	Neutral	-0.748461	0.0421866
VPS35	KRAS	3.62449	0.000671348		CNNM3	Neutral	-0.308549	NS		CLDN1	Neutral	-0.798366	0.00512088
CNNM2	KRAS	3.70044	0.00542395		ESYT2	Neutral	-0.305377	NS		CLINT1	Neutral	-0.183918	NS
DNAJB11	KRAS	3.80735	0.000499727		LRRC4B	Neutral	-0.304855	NS		CLNS1A	Neutral	-0.275007	0.00304628
FAM134B	KRAS	3.80735	0.000499727		PHLDB1	Neutral	-0.304855	NS		CNNM3	Neutral	-0.112027	NS
VEZT	KRAS	3.80735	0.00491082		CAB39	Neutral	-0.30117	NS		CNNM4	Neutral	1.06413	NS
DGKD	KRAS	3.90689	0.00162945		LIN7C	Neutral	-0.29956	NS		CORO1B	Neutral	-0.950861	1.33674e-05
EXD2	KRAS	4	0.00245234		TIMM50	Neutral	-0.298762	0.0332544		CPD	Neutral	-0.0894351	NS
LRP6	KRAS	4	0.00461025		FLOT1	Neutral	-0.295456	NS		CPNE8	Neutral	-0.897584	0.000202531
LRRC8C	KRAS	4	5.53024e-06		LRRC57	Neutral	-0.293196	NS		CPVL	Neutral	0.973033	0.000426606
SLC7A6	KRAS	4	5.53024e-06		EFR3B	Neutral	-0.290515	NS		CRKL	Neutral	-0.736064	0.000791207
BTN3A2	KRAS	4.08746	6.50615e-05		ITGA6	Neutral	-0.28985	0.00354258		CSNK1G3	Neutral	-0.314873	NS
STK11IP	KRAS	4.08746	0.00131073		SRC	Neutral	-0.289507	0.0483576		CSPG4	Neutral	0.624491	0.0332544
TRIO	KRAS	4.08746	0.000119558		DEPDC1B	Neutral	-0.285621	NS		CSRP2	Neutral	-0.351472	NS
ATP6AP2	KRAS	4.11548	5.03239e-06		USP9X	Neutral	-0.284729	NS		CTDSP1	Neutral	-0.896907	NS
CACNB2	KRAS	4.16993	0.00250901		SLC6A9	Neutral	-0.282934	NS		CTNNB1	Neutral	-0.181447	NS
KIAA0319L	KRAS	4.16993	0.000113686		PKP4	Neutral	-0.282934	0.0488461		CTNND1	Neutral	-0.538739	NS
CTSB	KRAS	4.24793	0.000105271		SOCS6	Neutral	-0.280108	NS		CTTN	Neutral	-0.753839	2.16539e-06
MGST3	KRAS	4.24793	0.000105271		C11orf67	Neutral	-0.280108	NS		CYFIP1	Neutral	0.201802	NS
DENND3	KRAS	4.32193	0.00028018		SLC5A3	Neutral	-0.277534	NS		CYFIP2	Neutral	0.317691	NS
MAGT1	KRAS	4.32193	1.374e-06		LZTR1	Neutral	-0.274469	0.019565		DAAM1	Neutral	0.932886	NS
ARAP2	KRAS	4.52356	0.00361186		LRRC1	Neutral	-0.273761	NS		DARS2	Neutral	-0.162271	NS
TDRKH	KRAS	4.58496	2.01965e-05		CTDSP1	Neutral	-0.273018	NS		DDOST	Neutral	-0.945552	0.0031492
DLG5	KRAS	4.64386	0.000146543		PLEKHA5	Neutral	-0.270897	NS		DDX39A	Neutral	-0.703018	0.00171459
AGPAT9	KRAS	4.75489	0.00491082		MCAM	Neutral	-0.267772	0.0199441		DDX3X	Neutral	-0.542588	0.00270133
UBXN4	KRAS	4.78136	0.000218041		ADD3	Neutral	-0.263297	0.0224915		DEPDC1B	Neutral	0.0105435	NS
OCIAD1	KRAS	4.85798	2.51898e-06		LYN	Neutral	-0.263034	0.0185903		DHCR7	Neutral	0.0588937	NS
ELOVL5	KRAS	4.90689	2.56687e-05		ITGA4	Neutral	-0.263034	NS		DHFR	Neutral	0.744161	0.011113
PRDX5	KRAS	5.04439	1.14454e-06		USP32	Neutral	-0.263034	NS		DIP2A	Neutral	-0.809669	0.00264098
ATP6AP1	KRAS	5.16993	9.04735e-05		C2CD2L	Neutral	-0.263034	NS		DIP2B	Neutral	-0.619728	0.032035
KCNB2	KRAS	5.2854	6.18255e-06		FLOT2	Neutral	-0.254125	0.00215273		DLG3	Neutral	0.261046	NS
DHRS7	KRAS	5.88264	0.000123846		CERS2	Neutral	-0.253757	NS		DNM2	Neutral	0.770518	0.00692005
HMOX2	KRAS	5.88264	5.64267e-05		STX5	Neutral	-0.251539	0.00131073		DOCK1	Neutral	0.4975	NS
TRIM13	KRAS	5.93074	3.23705e-06		PHB2	Neutral	-0.24664	NS		DOCK7	Neutral	0.725825	0.00183131
RAB27B	Neutral	-1.43296	NS		NDUFS1	Neutral	-0.241008	NS		DOCK9	Neutral	0.370368	NS
RGS7	Neutral	-1.37851	NS		RAB12	Neutral	-0.241008	NS		DPM1	Neutral	0.793549	NS
AASS	Neutral	-1.32193	NS		STX2	Neutral	-0.241008	NS		DRG1	Neutral	-0.770974	0.000398615
ATP9A	Neutral	-1.26303	NS		CNP	Neutral	-0.234465	NS		DSC2	Neutral	-0.282307	0.0221478
AGPS	Neutral	-1.22239	NS		PDE8A	Neutral	-0.234465	NS		DSG2	Neutral	0.0399878	NS
MFSD8	Neutral	-1.22239	NS		SLC4A2	Neutral	-0.234465	NS		DTNA	Neutral	-1.14684	NS
DYNLRB2	Neutral	-1.19265	NS		SLC4A4	Neutral	-0.234465	NS		ECI2	Neutral	-0.836501	0.0371309
NUDT4	Neutral	-1.19265	NS		ESYT1	Neutral	-0.223036	0.0054962		EEPD1	Neutral	-0.0892673	NS
VPS37B	Neutral	-1.09954	NS		TULP3	Neutral	-0.222392	NS		EFHD2	Neutral	-0.876265	0.000939561
NTPCR	Neutral	-1.05889	NS		SLC12A4	Neutral	-0.222392	NS		EFNB1	Neutral	-0.39682	0.0103679
ZDHHC14	Neutral	-1.05445	NS		SEMA6D	Neutral	-0.222392	NS		EFNB2	Neutral	-0.904184	1.17348e-06
MTM1	Neutral	-1.04731	NS		SLC25A17	Neutral	-0.222392	NS		EFR3A	Neutral	0	NS
STXBP5	Neutral	-1	NS		ATP5C1	Neutral	-0.220842	NS		EFR3B	Neutral	0.0744782	NS
CDC42EP4	Neutral	-0.993602	2.47907e-05		LPHN2	Neutral	-0.220088	NS		EGFR	Neutral	-0.0655883	NS
YWHAG	Neutral	-0.988685	0.000820169		RPN2	Neutral	-0.219445	NS		EHBP1	Neutral	-0.610053	0.011275
SNAP25	Neutral	-0.987289	0.00299474		TOMM22	Neutral	-0.219169	NS		EHD1	Neutral	-0.929611	0.00410734
SCAMP3	Neutral	-0.986825	0.00081553		PTPRG	Neutral	-0.218346	NS		EHD4	Neutral	-0.788496	0.0300197
CRKL	Neutral	-0.981176	1.58514e-05		MPP7	Neutral	-0.218092	NS		ELMO2	Neutral	-0.469485	NS
CLNS1A	Neutral	-0.978025	7.05077e-06		EFNB3	Neutral	-0.216811	NS		ELMOD3	Neutral	-0.887525	0.0334798
NDUFA5	Neutral	-0.963474	0.00104341		SLC12A6	Neutral	-0.215729	NS		ENO1	Neutral	-0.298778	0.000722211
CAV1	Neutral	-0.962525	0.00471586		PVRL2	Neutral	-0.212246	NS		EPB41L2	Neutral	-0.95944	NS
CDK16	Neutral	-0.962198	0.00121036		TMEM33	Neutral	-0.208587	NS		EPB41L3	Neutral	-0.0349086	NS
MPP5	Neutral	-0.959358	0.00327506		SNX1	Neutral	-0.208108	NS		EPB41L4B	Neutral	-0.858528	0.00547038
LSR	Neutral	-0.959102	0.00419982		LLGL2	Neutral	-0.206451	NS		EPB41L5	Neutral	0.0899421	NS
TIMM44	Neutral	-0.956931	0.0134		KCNB2	Neutral	-0.206451	NS		EPHA2	Neutral	0.319481	0.0278428
PCDH9	Neutral	-0.952694	0.00210818		RASA3	Neutral	-0.201634	NS		EPHA3	Neutral	-0.110424	NS
MPP6	Neutral	-0.95109	0.00254539		AMIGO2	Neutral	-0.201634	NS		EPHA4	Neutral	0.0430687	NS
ARF5	Neutral	-0.950247	0.0243161		PI4KA	Neutral	-0.197681	NS		EPHA7	Neutral	-0.925146	0.00164823
LRRC1	Neutral	-0.933911	0.00762227		SCAMP3	Neutral	-0.19592	NS		EPHB2	Neutral	0.289507	NS
PLCB1	Neutral	-0.931982	1.4723e-05		PLCH1	Neutral	-0.194647	NS		EPHB4	Neutral	-0.658963	NS
SYTL4	Neutral	-0.929611	0.00276973		SYTL4	Neutral	-0.192645	NS		EPN2	Neutral	-0.0614005	NS
NAMPT	Neutral	-0.926834	0.000683887		LZTS2	Neutral	-0.192645	NS		EPS15L1	Neutral	-0.766304	0.000873831
HIGD1A	Neutral	-0.925999	NS		KIRREL	Neutral	-0.191397	NS		EPS8	Neutral	-0.979822	0.00297747
PCNA	Neutral	-0.924051	0.0123747		DST	Neutral	-0.188969	NS		ERBB2	Neutral	-0.726982	0.0250449
STT3A	Neutral	-0.921997	0.000550564		CPVL	Neutral	-0.188762	NS		ERBB2IP	Neutral	0.864648	NS
GAPDH	Neutral	-0.920059	5.49125e-05		CDC42BPA	Neutral	-0.188445	NS		ESYT1	Neutral	-0.273618	0.0069669
SLC6A8	Neutral	-0.920032	0.000511053		MARK2	Neutral	-0.187627	NS		ESYT2	Neutral	-0.295949	NS
UNC5C	Neutral	-0.919581	0.00122416		CACHD1	Neutral	-0.185032	NS		EXOC3	Neutral	-0.91983	0.000579087
MICALL1	Neutral	-0.917538	0.0023843		PPA1	Neutral	-0.179448	NS		EXOC7	Neutral	-0.0824622	NS
LLGL2	Neutral	-0.91427	0.00140873		EMD	Neutral	-0.178803	NS		F11R	Neutral	-0.831877	0.0348707
EFNB1	Neutral	-0.913782	0.000101512		ADCY9	Neutral	-0.168506	NS		FADS2	Neutral	0.0995357	NS
SH3GL1	Neutral	-0.913017	0.0011742		DSG2	Neutral	-0.168494	NS		FAM126A	Neutral	0.0641303	NS
MARCKS	Neutral	-0.912537	0.00534903		PHB	Neutral	-0.16323	NS		FAM129B	Neutral	-0.866249	3.93605e-06
PDCD6IP	Neutral	-0.906891	0.00601868		SLC30A1	Neutral	-0.158366	NS		FAM135A	Neutral	0.139725	NS
MARK3	Neutral	-0.901352	0.00122584		PIK3CA	Neutral	-0.156119	NS		FAM171A1	Neutral	0.308753	NS
AHCYL2	Neutral	-0.901222	0.000806238		DDOST	Neutral	-0.150025	NS		FAM171A2	Neutral	0.649814	0.0287466
ARAF	Neutral	-0.898717	0.000481649		DSC2	Neutral	-0.139584	NS		FAM83B	Neutral	0.663519	0.0195086
MCAM	Neutral	-0.89418	6.52546e-05		FLRT3	Neutral	-0.137504	NS		FAM92A1	Neutral	-0.752072	0.0116059
ADCY3	Neutral	-0.893085	0.0344811		JAG2	Neutral	-0.137504	NS		FAR1	Neutral	0.229482	NS
EPHA7	Neutral	-0.893085	0.00590932		SLC20A2	Neutral	-0.137504	NS		FARP1	Neutral	0.0948592	NS
TMEM87A	Neutral	-0.893085	NS		TRPM4	Neutral	-0.137504	NS		FCHO2	Neutral	0.864648	0.00123909
AMIGO2	Neutral	-0.887525	NS		ODZ3	Neutral	-0.134165	NS		FDFT1	Neutral	-0.900464	NS
SHOC2	Neutral	-0.887525	0.0334798		FAM171A2	Neutral	-0.132755	NS		FIBP	Neutral	0.714246	0.0014298
ATP5A1	Neutral	-0.885594	2.89328e-08		GPRIN3	Neutral	-0.129283	NS		FLOT2	Neutral	-0.0624641	NS
SPAG1	Neutral	-0.874469	NS		SLC12A7	Neutral	-0.128475	NS		FLRT3	Neutral	0.712198	NS
PALM2	Neutral	-0.865863	6.35429e-05		EEPD1	Neutral	-0.128324	NS		FLVCR1	Neutral	-0.764897	0.0119732
LAMTOR2	Neutral	-0.865699	0.00463826		RHOT2	Neutral	-0.125531	NS		FMN2	Neutral	0.234465	NS
FAM125A	Neutral	-0.86507	0.0443925		CFL1	Neutral	-0.121136	NS		FNBP1	Neutral	-0.956057	0.000388337
ACSL4	Neutral	-0.862496	0.00796561		VAT1	Neutral	-0.120294	NS		FRS2	Neutral	-0.46048	0.0104069
KIAA1609	Neutral	-0.862496	0.00370451		EPHA3	Neutral	-0.119582	NS		FTSJ1	Neutral	0.197939	NS
RCN2	Neutral	-0.862496	NS		CDCA3	Neutral	-0.119299	NS		GAB1	Neutral	-0.578268	0.0018699
C1QBP	Neutral	-0.857367	0.000133944		ATP1B3	Neutral	-0.114171	NS		GAPDH	Neutral	0.00283159	NS
PACSIN2	Neutral	-0.854626	0.000193354		TMEM237	Neutral	-0.111031	NS		GFPT1	Neutral	-0.542149	0.0425628
GPRC5C	Neutral	-0.847997	0.0407674		TMEM48	Neutral	-0.110183	NS		GMDS	Neutral	0.70044	NS
LMNB1	Neutral	-0.847997	0.00109263		ARL13B	Neutral	-0.106128	NS		GNA13	Neutral	-1.09954	NS
SNAP29	Neutral	-0.847997	0.00231149		SLC22A5	Neutral	-0.0995357	NS		GNB2L1	Neutral	-0.75048	0.0132822
VDAC2	Neutral	-0.8468	2.81301e-05		ATP1A1	Neutral	-0.0990294	NS		GNB5	Neutral	-0.485427	NS
CPNE3	Neutral	-0.843274	0.0271264		MAP2K2	Neutral	-0.0931094	NS		GOPC	Neutral	0.836501	0.0457436
STON1	Neutral	-0.842459	0.00708835		CDC42EP1	Neutral	-0.0912958	NS		GORASP2	Neutral	0.742842	0.0136875
PPP2CA	Neutral	-0.83289	0.00245234		EFR3A	Neutral	-0.0885367	NS		GPRC5C	Neutral	-0.432959	NS
NONO	Neutral	-0.831546	0.00015616		ROBO2	Neutral	-0.0874628	NS		GPRIN1	Neutral	-0.0743822	NS
PDHB	Neutral	-0.830075	0.025283		EXD2	Neutral	-0.0874628	NS		GPRIN3	Neutral	0.807355	NS
NPEPPS	Neutral	-0.827819	0.00364323		ATP2B4	Neutral	-0.0824622	NS		GRAMD1A	Neutral	-1.41504	NS
CFL1	Neutral	-0.82678	0.00152075		GFPT1	Neutral	-0.0780025	NS		GRID1	Neutral	-0.112475	NS
ACTG1	Neutral	-0.82103	9.10551e-05		DAB2IP	Neutral	-0.0740006	NS		GULP1	Neutral	-0.736966	NS
SLC7A5	Neutral	-0.820179	0.0106347		ITGA8	Neutral	-0.0740006	NS		HEATR2	Neutral	0.530515	NS
RAB9A	Neutral	-0.818162	0.0174866		BASP1	Neutral	-0.0671142	NS		HLA-A	Neutral	-0.570926	0.00105152
LRRC57	Neutral	-0.816037	0.00645894		STOM	Neutral	-0.0671142	NS		HLA-C	Neutral	-0.311944	NS
ITGA2	Neutral	-0.808469	0.000382105		KIAA1549	Neutral	-0.0655883	NS		HN1L	Neutral	-0.860142	6.4242e-05
SLC26A2	Neutral	-0.807355	NS		SNX9	Neutral	-0.0654231	NS		HSD17B12	Neutral	-0.316027	0.00590353
ATP5J2-PTCD1	Neutral	-0.797507	4.80279e-05		ZDHHC8	Neutral	-0.0627358	NS		HSP90AA1	Neutral	-0.736966	0.0058137
SLC9A3R2	Neutral	-0.793549	0.0112611		ANKS6	Neutral	-0.0588937	NS		HSP90AB1	Neutral	-0.669027	6.65793e-05
ARFIP1	Neutral	-0.792767	0.0040894		WWOX	Neutral	-0.0527415	NS		HSPA12A	Neutral	-0.267772	NS
EPS8	Neutral	-0.792195	0.0148137		ZDHHC20	Neutral	-0.0524674	NS		HSPA5	Neutral	-0.231326	NS
ITGA5	Neutral	-0.791963	8.73446e-05		PACSIN2	Neutral	-0.0513992	NS		IARS2	Neutral	-0.163499	NS
NEDD4L	Neutral	-0.791413	NS		ARF4	Neutral	-0.0465426	NS		IDI1	Neutral	-0.658963	NS
PACSIN3	Neutral	-0.785875	NS		YKT6	Neutral	-0.0383538	NS		IGF1R	Neutral	-0.0473057	NS
PELO	Neutral	-0.784271	NS		EPHB2	Neutral	-0.0331669	NS		IGSF3	Neutral	0.784271	0.0252904
STX10	Neutral	-0.783508	0.00311631		KIAA1522	Neutral	-0.0331669	NS		INSR	Neutral	0.584963	NS
NSUN2	Neutral	-0.780219	0.000256417		BAIAP2	Neutral	-0.0312961	NS		IQGAP1	Neutral	0.657112	0.00542395
MLLT4	Neutral	-0.776866	0.000214134		PIK3R1	Neutral	-0.0291463	NS		IQGAP2	Neutral	-0.559427	NS
ATP1B3	Neutral	-0.770518	0.00129573		SEMA6A	Neutral	-0.0280144	NS		IRS4	Neutral	0.00289407	NS
DAG1	Neutral	-0.767827	0.00580549		SEPT9	Neutral	-0.0276122	NS		ITCH	Neutral	-0.494765	0.0397825
RAB5A	Neutral	-0.767827	0.00208317		NOTCH1	Neutral	-0.0274807	NS		ITGA2	Neutral	0.0652915	NS
NPM1	Neutral	-0.767023	1.97736e-06		SULT1A1	Neutral	-0.0223678	NS		ITGA3	Neutral	-0.584963	0.0229161
SEPT9	Neutral	-0.76184	0.00358394		JPH1	Neutral	-0.0193653	NS		ITGA4	Neutral	0.0242475	NS
EPB41L2	Neutral	-0.75967	NS		ATP2B1	Neutral	0	NS		ITGA5	Neutral	-0.985786	7.75626e-05
NDUFA9	Neutral	-0.758992	0.000155129		VAMP3	Neutral	0	NS		ITGA6	Neutral	0.13596	NS
SEPT3	Neutral	-0.758992	NS		STXBP1	Neutral	0	NS		ITGA7	Neutral	0.955146	4.42667e-07
YARS2	Neutral	-0.758992	0.0284246		TC2N	Neutral	0	NS		ITGAV	Neutral	-0.40018	0.00583137
FAM129B	Neutral	-0.741553	2.20974e-05		MAP4K4	Neutral	0	NS		ITGB1	Neutral	-0.264306	0.000893654
GULP1	Neutral	-0.736966	NS		NCS1	Neutral	0	NS		JPH1	Neutral	-0.0749621	NS
RAB8A	Neutral	-0.736966	0.0197807		SRP9	Neutral	0	NS		JUP	Neutral	0.262662	0.0337849
NF2	Neutral	-0.727628	0.0055646		VPS45	Neutral	0	NS		KIAA0195	Neutral	0.0588937	NS
NUP93	Neutral	-0.726982	0.0457212		CDK17	Neutral	0	NS		KIAA0528	Neutral	-0.0120728	NS
CADM1	Neutral	-0.725378	0.000392908		NDUFV2	Neutral	0	NS		KIAA0754	Neutral	-1.41504	NS
ARHGDIA	Neutral	-0.719099	0.000273246		RASAL2	Neutral	0.00769439	NS		KIAA1274	Neutral	0.16006	NS
CSNK1G3	Neutral	-0.718229	0.0122851		SNAP23	Neutral	0.00875247	NS		KIAA1522	Neutral	0.874469	NS
VAMP3	Neutral	-0.711042	NS		PTPN13	Neutral	0.0119975	NS		KIAA1549	Neutral	-0.39079	0.0382452
ITGB1	Neutral	-0.707607	3.22306e-05		DOCK11	Neutral	0.0204641	NS		KIAA1804	Neutral	0.403356	NS
ABI1	Neutral	-0.696855	0.00161573		MAPKAP1	Neutral	0.0238467	NS		KIRREL	Neutral	-0.0766213	NS
ARF1	Neutral	-0.695462	0.0196658		HSPA5	Neutral	0.0259019	NS		LAMTOR3	Neutral	-0.841302	NS
GPRIN1	Neutral	-0.69411	0.0430194		EPHA7	Neutral	0.0320612	NS		LCLAT1	Neutral	-0.415037	NS
GARS	Neutral	-0.691878	0.0300197		RP2	Neutral	0.0374747	NS		LIN7C	Neutral	-0.0874628	NS
SLC7A2	Neutral	-0.691878	0.000433002		GRID1	Neutral	0.0384741	NS		LLGL1	Neutral	-0.249278	0.0173628
PAG1	Neutral	-0.690672	0.0198821		CTNND1	Neutral	0.0416345	NS		LLGL2	Neutral	-0.707819	0.00366046
HBXIP	Neutral	-0.688056	0.0271396		UPF3B	Neutral	0.0418202	NS		LMNB1	Neutral	-0.66213	0.00426743
NUMB	Neutral	-0.680932	0.00064726		SLC7A1	Neutral	0.0489096	NS		LNPEP	Neutral	0.273018	NS
DHCR7	Neutral	-0.678072	NS		DNM2	Neutral	0.0489096	NS		LPHN2	Neutral	-0.29045	NS
EPN2	Neutral	-0.678072	NS		STT3B	Neutral	0.0544478	NS		LRBA	Neutral	0.490912	0.0187292
GRAMD1A	Neutral	-0.678072	NS		RELL1	Neutral	0.0574855	NS		LRP8	Neutral	-0.316474	NS
MAP2K2	Neutral	-0.678072	NS		WDR11	Neutral	0.0609144	NS		LRRC1	Neutral	-0.66015	0.041727
SEPT6	Neutral	-0.678072	0.0056347		ITGAV	Neutral	0.0636161	NS		LRRC4B	Neutral	-0.308122	NS
TUFM	Neutral	-0.674759	0.00296564		VAMP2	Neutral	0.0679041	NS		LRRC57	Neutral	-0.522841	0.0366291
SHB	Neutral	-0.672835	0.00630863		SLC7A5	Neutral	0.0692627	NS		LRRC8A	Neutral	1.8365	NS
SEPT11	Neutral	-0.655665	0.0165156		FTSJ1	Neutral	0.0721498	NS		LSR	Neutral	-0.508659	0.0381045
MCM7	Neutral	-0.65388	0.000134256		SCAMP1	Neutral	0.0730635	NS		LYN	Neutral	-0.871676	0.000260337
IL1RAP	Neutral	-0.652077	NS		SHOC2	Neutral	0.0740006	NS		LZTR1	Neutral	0.349074	0.000459526
PIP5K1A	Neutral	-0.639824	0.00143953		RAB11FIP1	Neutral	0.0746388	NS		MAP2K1	Neutral	-0.0660892	NS
PLD1	Neutral	-0.638402	0.000176386		CAV1	Neutral	0.0759489	NS		MAP2K2	Neutral	-0.584963	NS
CIRBP	Neutral	-0.63743	0.00907675		MTMR10	Neutral	0.0824622	NS		MAP4K4	Neutral	-0.179324	NS
RAB7A	Neutral	-0.636678	0.0017053		EXOC7	Neutral	0.0824622	NS		MAPKAP1	Neutral	0.862496	0.0210109
PPA1	Neutral	-0.63196	0.00127512		ATP6AP1	Neutral	0.0824622	NS		MARCKS	Neutral	-0.540568	0.00231321
CTNNB1	Neutral	-0.631613	0.0461965		CXADR	Neutral	0.0848889	NS		MARK1	Neutral	0.965235	0.0465282
PSMD3	Neutral	-0.631505	0.0031345		NDUFS2	Neutral	0.0848889	NS		MARK2	Neutral	0.881819	NS
CD276	Neutral	-0.628031	0.0220965		PAK2	Neutral	0.0926112	NS		MARK3	Neutral	-0.0822011	NS
CTNNA1	Neutral	-0.624491	0.0088109		GPRC5A	Neutral	0.0931094	NS		MARVELD2	Neutral	-0.910363	0.00599217
PAK4	Neutral	-0.623926	0.00176231		VDAC1	Neutral	0.0941222	NS		MB21D2	Neutral	-0.878985	0.0260931
CDK1	Neutral	-0.622633	0.00165451		BRK1	Neutral	0.0995357	NS		MCAM	Neutral	-0.626407	0.000574651
MARCKSL1	Neutral	-0.621488	0.0149852		SNTB2	Neutral	0.101283	NS		MCM6	Neutral	-0.807355	0.00775117
PPAP2B	Neutral	-0.621488	0.0464613		SLC43A1	Neutral	0.106915	NS		MCM7	Neutral	0.274903	0.0281987
SHISA2	Neutral	-0.621488	0.027396		AP1M1	Neutral	0.106915	NS		MICAL3	Neutral	0.745427	9.6534e-05
FLVCR1	Neutral	-0.620507	0.0069647		NISCH	Neutral	0.11477	NS		MICALL1	Neutral	-0.121679	NS
GFPT1	Neutral	-0.620152	NS		STRADA	Neutral	0.115477	NS		MINK1	Neutral	0.206451	NS
SEPT7	Neutral	-0.619926	0.00450194		SBF1	Neutral	0.115477	NS		MLLT4	Neutral	-0.148116	0.040491
APBB1	Neutral	-0.618437	0.0117916		PLXNA1	Neutral	0.116514	NS		MPDU1	Neutral	0.758992	0.0240082
CFL2	Neutral	-0.616671	NS		CCDC47	Neutral	0.118181	NS		MPP1	Neutral	-0.807355	0.00693081
TIMM50	Neutral	-0.614449	0.00525608		RAB5A	Neutral	0.121991	NS		MPP7	Neutral	0.107247	NS
LRRC4B	Neutral	-0.612977	NS		RAB13	Neutral	0.121991	NS		MPZL1	Neutral	-0.024453	NS
LAMTOR1	Neutral	-0.61193	0.00314068		FAM129B	Neutral	0.124696	NS		MTHFD1	Neutral	-0.755581	0.000222039
ESYT2	Neutral	-0.601326	0.000748344		PGRMC2	Neutral	0.126316	NS		MTM1	Neutral	-0.253757	NS
MARVELD2	Neutral	-0.598902	0.0243398		SLC38A2	Neutral	0.126633	NS		MTMR10	Neutral	-0.0554951	NS
ARL13B	Neutral	-0.595934	0.00241083		OCLN	Neutral	0.127262	NS		NAMPT	Neutral	0.180082	NS
PCDH7	Neutral	-0.593022	0.00110905		PTK7	Neutral	0.128898	NS		NCAM1	Neutral	-0.775785	0.00151355
TRIP13	Neutral	-0.592825	0.039422		LRP8	Neutral	0.130061	NS		NCKAP1	Neutral	0.444184	0.0127371
RPN2	Neutral	-0.591816	0.0123975		FIBP	Neutral	0.131245	NS		NCLN	Neutral	-0.283793	NS
ATP2B1	Neutral	-0.587198	NS		STXBP3	Neutral	0.137504	NS		NDRG1	Neutral	-0.58076	0.000112238
DIP2B	Neutral	-0.584963	0.047765		FLVCR1	Neutral	0.14439	NS		NDRG3	Neutral	0.0622843	NS
MPP1	Neutral	-0.584963	0.00114279		MICAL3	Neutral	0.14439	NS		NDUFA9	Neutral	-0.161751	NS
NDUFS3	Neutral	-0.584963	NS		UTRN	Neutral	0.144948	NS		NDUFS1	Neutral	-0.0544478	NS
PALM	Neutral	-0.581731	0.0317303		SLC6A15	Neutral	0.145956	NS		NDUFS7	Neutral	-0.440573	NS
OSBPL8	Neutral	-0.580916	0.00236234		AP2A1	Neutral	0.150243	NS		NDUFV1	Neutral	0.70044	NS
C2CD4C	Neutral	-0.575502	NS		PLCL2	Neutral	0.152003	NS		NDUFV2	Neutral	0.263034	NS
ROCK1	Neutral	-0.574909	0.00845614		CDC42BPB	Neutral	0.152003	NS		NF2	Neutral	-0.944858	0.0472932
SEPT8	Neutral	-0.573185	NS		STXBP2	Neutral	0.169925	NS		NISCH	Neutral	0.937069	0.00267448
PKN2	Neutral	-0.570492	2.31404e-05		MPRIP	Neutral	0.169925	NS		NONO	Neutral	-0.544183	0.00163771
ANO6	Neutral	-0.567041	0.0133069		THSD1	Neutral	0.169925	NS		NOTCH1	Neutral	0.0274807	NS
ELMOD3	Neutral	-0.565597	0.0321045		ALCAM	Neutral	0.175087	NS		NOTCH2	Neutral	0.394684	0.00428039
WDR41	Neutral	-0.560957	0.00569133		EPHB4	Neutral	0.178337	NS		NPEPPS	Neutral	-0.792195	0.00839199
PGRMC1	Neutral	-0.555215	0.0270052		EPS8	Neutral	0.187627	NS		NPM1	Neutral	-0.200742	0.0130235
SEMA4C	Neutral	-0.554589	NS		OAT	Neutral	0.192645	NS		NPTN	Neutral	-0.807355	NS
MTMR14	Neutral	-0.552541	NS		ITGA5	Neutral	0.193823	NS		NSUN2	Neutral	-0.780219	0.000511565
RAB5C	Neutral	-0.545434	0.0214793		CCDC88A	Neutral	0.197939	NS		NT5DC2	Neutral	0.807355	NS
ATP2A2	Neutral	-0.544996	0.00106586		TAOK3	Neutral	0.197939	NS		NTPCR	Neutral	-0.736966	NS
PHB	Neutral	-0.544321	0.00120145		RAB7A	Neutral	0.203214	NS		NUDT4	Neutral	-1.67807	NS
USP6NL	Neutral	-0.541795	0.0147582		HSPA12A	Neutral	0.203284	NS		NUMB	Neutral	-0.336283	NS
NDUFV1	Neutral	-0.540568	NS		YWHAE	Neutral	0.208587	NS		NUMBL	Neutral	0.192645	NS
SLC4A7	Neutral	-0.537056	0.00551665		NF2	Neutral	0.217231	NS		NUP93	Neutral	-0.395138	NS
SLC6A6	Neutral	-0.536053	0.00332583		MPP1	Neutral	0.222392	NS		OSBPL11	Neutral	0.893085	0.00692005
SLC25A5	Neutral	-0.531275	4.83707e-05		SLC19A1	Neutral	0.222392	NS		OSBPL8	Neutral	-0.199609	0.0463981
SLC38A1	Neutral	-0.530515	NS		PLCB1	Neutral	0.22556	NS		PACSIN2	Neutral	-0.803227	0.00595286
SNX9	Neutral	-0.52937	0.000118862		TRAP1	Neutral	0.240134	NS		PAK2	Neutral	0.557331	0.00245718
PSTPIP2	Neutral	-0.525461	0.0174866		ATP6AP2	Neutral	0.241008	NS		PAK4	Neutral	0.125531	NS
CD99	Neutral	-0.525091	NS		STIM2	Neutral	0.247928	NS		PARD3	Neutral	-0.419714	NS
YWHAB	Neutral	-0.521698	0.0358403		RAB23	Neutral	0.253119	NS		PARD3B	Neutral	0.862496	NS
VAMP7	Neutral	-0.520832	NS		LBR	Neutral	0.253917	NS		PARD6B	Neutral	-0.103093	NS
ALDH18A1	Neutral	-0.520603	0.00581536		DAG1	Neutral	0.255257	NS		PCDH7	Neutral	-0.25422	0.0196172
PDZD11	Neutral	-0.518131	0.0329242		MPP6	Neutral	0.263034	NS		PDE8A	Neutral	-0.765535	NS
SEPT2	Neutral	-0.51684	7.72229e-05		CHMP6	Neutral	0.263034	NS		PDHB	Neutral	-0.455679	NS
CYFIP1	Neutral	-0.515126	0.000951674		SPAG1	Neutral	0.263034	NS		PDZD11	Neutral	0.0368368	NS
ZDHHC5	Neutral	-0.514573	0.039457		OSBPL11	Neutral	0.269187	NS		PEAK1	Neutral	0.482942	NS
LPHN2	Neutral	-0.510538	4.25033e-05		NDUFAF2	Neutral	0.271302	NS		PFKP	Neutral	0.289507	NS
ABI2	Neutral	-0.509014	NS		ABCC1	Neutral	0.274622	NS		PFN1	Neutral	-0.917538	0.000866343
CTNND1	Neutral	-0.497105	0.00181361		PLD1	Neutral	0.284977	NS		PGRMC2	Neutral	0.971986	0.000355691
ESYT1	Neutral	-0.496654	0.000185306		KIAA1609	Neutral	0.289507	NS		PHACTR4	Neutral	0.109878	NS
STXBP3	Neutral	-0.494765	0.0196294		EPB41L5	Neutral	0.29956	NS		PHB	Neutral	-0.38109	0.00381203
APPL2	Neutral	-0.491853	NS		RAB3B	Neutral	0.29956	NS		PHB2	Neutral	-0.141246	NS
B7H6	Neutral	-0.485427	NS		TNIK	Neutral	0.302029	NS		PHLDB1	Neutral	0.392317	NS
IARS2	Neutral	-0.485427	NS		SRGAP2	Neutral	0.304855	NS		PHLDB2	Neutral	1.55254	NS
ITPA	Neutral	-0.485427	0.0169647		ILDR2	Neutral	0.31034	NS		PI4KA	Neutral	0.589368	0.0184634
RHOG	Neutral	-0.485427	NS		MARVELD2	Neutral	0.311461	0.030766		PICALM	Neutral	-0.485427	0.0247802
WLS	Neutral	-0.485427	NS		GNB2L1	Neutral	0.311708	NS		PIGU	Neutral	-1.152	NS
EPB41L3	Neutral	-0.483667	0.018487		STX10	Neutral	0.316027	NS		PIK3CB	Neutral	0.943416	0.01669
CAND1	Neutral	-0.481012	0.00143682		STX12	Neutral	0.31774	0.0214793		PIK3R1	Neutral	0.334001	NS
EPHB4	Neutral	-0.480626	NS		ELMOD3	Neutral	0.321928	NS		PIK3R2	Neutral	0.244538	NS
PSD3	Neutral	-0.47969	0.00135709		DOCK1	Neutral	0.321928	NS		PIK3R3	Neutral	0.707819	0.00366046
ARHGAP1	Neutral	-0.477773	0.0263582		ASIC1	Neutral	0.321928	NS		PIP5K1A	Neutral	0.219313	NS
SENP3	Neutral	-0.476438	NS		MAGT1	Neutral	0.321928	0.0300197		PIP5K1C	Neutral	-0.530515	NS
PHACTR4	Neutral	-0.475085	0.00983696		STIM1	Neutral	0.326228	NS		PKN2	Neutral	-0.494765	0.00321178
TBC1D10B	Neutral	-0.473931	0.0278906		EGFR	Neutral	0.328623	NS		PKP2	Neutral	-0.404842	NS
SLC6A15	Neutral	-0.473336	0.00325585		ZC3HAV1	Neutral	0.33828	NS		PKP4	Neutral	0.814785	0.000442646
PARVA	Neutral	-0.469485	NS		PAG1	Neutral	0.341037	NS		PLCB4	Neutral	1.45943	NS
VDAC1	Neutral	-0.469063	0.000935818		PIK3R2	Neutral	0.343484	NS		PLCL2	Neutral	-0.0524674	NS
SNTB1	Neutral	-0.467126	NS		UBXN4	Neutral	0.355095	NS		PLD1	Neutral	-0.923379	0.000891326
SNAP23	Neutral	-0.461545	0.000982796		SH3BP4	Neutral	0.356144	NS		PLEKHA1	Neutral	-0.347463	0.00857056
KIAA1549	Neutral	-0.456378	0.00465921		LRRC8A	Neutral	0.356144	NS		PLEKHA5	Neutral	-0.0800644	NS
TIAM1	Neutral	-0.448758	NS		ARVCF	Neutral	0.359542	NS		PLEKHA7	Neutral	0.564785	NS
ROBO1	Neutral	-0.447459	0.0278113		RER1	Neutral	0.367732	NS		PLXNA1	Neutral	-0.141176	NS
SLC25A3	Neutral	-0.4458	0.0153141		CD276	Neutral	0.371969	NS		PPA1	Neutral	-0.452512	0.00248733
GNB2L1	Neutral	-0.438772	0.00775117		DHFR	Neutral	0.376854	NS		PPFIA1	Neutral	0.842459	0.0207029
SEMA6A	Neutral	-0.436099	NS		GNB5	Neutral	0.378512	NS		PPFIBP1	Neutral	0.311461	NS
RAB13	Neutral	-0.434403	NS		WLS	Neutral	0.383329	NS		PPP1R16B	Neutral	0.917538	NS
SLC16A1	Neutral	-0.426265	NS		FNBP1L	Neutral	0.387023	NS		PPP1R9A	Neutral	0.784271	NS
SCRIB	Neutral	-0.42414	0.00162717		KIAA0528	Neutral	0.390584	0.00701272		PRKAR2A	Neutral	-0.580193	0.0360234
DSC2	Neutral	-0.421891	0.0168056		FARP1	Neutral	0.418313	NS		PRKAR2B	Neutral	0.167457	NS
CNNM3	Neutral	-0.420576	NS		PALM2	Neutral	0.419539	NS		PRKCI	Neutral	-0.924712	0.000148153
SEMA6D	Neutral	-0.415037	NS		RAB18	Neutral	0.424498	NS		PRR5	Neutral	-0.943416	0.00418111
SLC12A2	Neutral	-0.412705	0.0079105		SNAP47	Neutral	0.433897	0.0169647		PSD3	Neutral	-0.982859	0.000884877
STEAP2	Neutral	-0.408465	0.0467712		EPHA4	Neutral	0.436099	NS		PSMD3	Neutral	-0.551015	0.0246303
SLC25A13	Neutral	-0.406625	NS		RAB11FIP5	Neutral	0.437405	NS		PTDSS1	Neutral	1.078	NS
RHBDF2	Neutral	-0.40439	0.0271396		STX8	Neutral	0.440573	NS		PTK7	Neutral	-0.467986	0.013586
ARL2	Neutral	-0.399607	0.042911		CTNNA1	Neutral	0.442005	0.00148234		PTPN13	Neutral	0.129095	NS
SLC19A1	Neutral	-0.399096	NS		LAMTOR1	Neutral	0.442518	NS		PTPN14	Neutral	0.874469	0.0494278
SFXN1	Neutral	-0.391579	0.0104152		MET	Neutral	0.449803	NS		PTPRJ	Neutral	0.494765	NS
PHB2	Neutral	-0.387886	0.0142981		ABCC5	Neutral	0.450166	NS		PTRF	Neutral	-0.887525	NS
LIN7C	Neutral	-0.387023	NS		IGF1R	Neutral	0.450661	NS		PVRL1	Neutral	0.347923	NS
DNAJA2	Neutral	-0.38247	NS		SPTBN1	Neutral	0.451479	NS		RAB10	Neutral	-0.443607	NS
HSD17B4	Neutral	-0.378512	NS		PTPRF	Neutral	0.459432	NS		RAB11FIP1	Neutral	-0.446608	0.0172845
RAPGEF2	Neutral	-0.378512	NS		ATG9A	Neutral	0.459432	NS		RAB11FIP5	Neutral	-0.681824	0.0104152
SCARB1	Neutral	-0.377367	0.00462513		SHB	Neutral	0.464668	NS		RAB13	Neutral	-0.556393	0.0485331
ADD1	Neutral	-0.374978	0.0218564		XPR1	Neutral	0.465664	NS		RAB18	Neutral	0.203533	NS
RAB11FIP1	Neutral	-0.371969	0.0109739		PTPN1	Neutral	0.466318	0.00605924		RAB27B	Neutral	-0.754888	NS
KIAA1274	Neutral	-0.365871	0.00383267		AKT1	Neutral	0.469485	NS		RAB3B	Neutral	0.241008	NS
SLC30A1	Neutral	-0.36434	0.0435194		SLC1A4	Neutral	0.472068	NS		RAB5A	Neutral	-0.889817	0.00993345
CCNY	Neutral	-0.36257	NS		CADM1	Neutral	0.473931	0.0157223		RAB5C	Neutral	-0.0544478	NS
CCDC88A	Neutral	-0.358454	NS		NCAM1	Neutral	0.479168	NS		RAB6A	Neutral	0.0681715	NS
PEAK1	Neutral	-0.352672	NS		ADCY3	Neutral	0.485427	NS		RAB7A	Neutral	-0.839892	0.000794221
PLEKHA5	Neutral	-0.350961	0.00994238		MFAP3	Neutral	0.485427	NS		RAB8A	Neutral	-0.234465	NS
NCLN	Neutral	-0.347923	NS		ACSL4	Neutral	0.495957	NS		RAF1	Neutral	0.471306	0.00239897
DARS2	Neutral	-0.345135	0.0400578		SDK1	Neutral	0.4975	NS		RAI14	Neutral	0.688292	0.000314496
IRS4	Neutral	-0.341616	0.0397851		ADAM22	Neutral	0.5025	NS		RALA	Neutral	-0.830075	NS
SLC29A1	Neutral	-0.340075	NS		PSD3	Neutral	0.503168	NS		RAN	Neutral	0.974689	0.000833841
AFG3L2	Neutral	-0.339486	NS		ATP7A	Neutral	0.505235	NS		RAPGEF2	Neutral	-0.70044	NS
PTK7	Neutral	-0.339089	0.0109878		FAM91A1	Neutral	0.507657	0.00852633		RASA2	Neutral	-1.08746	NS
ITGAV	Neutral	-0.336563	0.021765		PKP2	Neutral	0.508464	NS		RASAL2	Neutral	0.524527	0.0146342
RRAGC	Neutral	-0.331844	NS		PALM	Neutral	0.518729	NS		RFTN1	Neutral	0.713696	0.0393494
GNA13	Neutral	-0.321928	NS		VAMP7	Neutral	0.523562	0.0125746		RHOT2	Neutral	0.192645	NS
FLOT2	Neutral	-0.316589	0.00433475		PIK3CB	Neutral	0.526069	0.0371309		RICTOR	Neutral	0.346278	NS
PFKP	Neutral	-0.311944	0.00376031		STX6	Neutral	0.530515	NS		ROBO1	Neutral	0.246915	NS
SNX1	Neutral	-0.311944	NS		PPAP2B	Neutral	0.530515	NS		ROBO2	Neutral	0.161463	NS
RAB6A	Neutral	-0.31034	NS		ATP11C	Neutral	0.530515	NS		ROCK1	Neutral	-0.148644	NS
YWHAE	Neutral	-0.308549	NS		LRRC8C	Neutral	0.540568	NS		ROCK2	Neutral	-0.0614005	NS
NOTCH2	Neutral	-0.307234	0.0268497		UNC5C	Neutral	0.542149	NS		ROR1	Neutral	-0.234465	NS
NDRG3	Neutral	-0.306103	NS		TMEM51	Neutral	0.547488	NS		ROR2	Neutral	0.440573	0.0103078
RSPRY1	Neutral	-0.304855	NS		DAAM1	Neutral	0.561879	NS		RP2	Neutral	0.247928	NS
SLC7A11	Neutral	-0.304855	NS		ARHGDIA	Neutral	0.562936	0.00883326		RPN2	Neutral	-0.372371	0.00742221
STK10	Neutral	-0.304855	NS		LNPEP	Neutral	0.568284	NS		RTCD1	Neutral	0.447459	NS
SLC25A6	Neutral	-0.298523	NS		SRM	Neutral	0.571157	0.0444265		SAR1A	Neutral	-0.973033	0.000144129
NCAM1	Neutral	-0.296617	NS		ACSL3	Neutral	0.584963	0.00925641		SAR1B	Neutral	0.938599	NS
NDUFS1	Neutral	-0.295456	NS		TRIOBP	Neutral	0.584963	0.0284246		SBF1	Neutral	-0.152003	NS
PTPRJ	Neutral	-0.289507	NS		AHCYL1	Neutral	0.59136	NS		SCAMP3	Neutral	-0.790904	0.000606275
TMEM97	Neutral	-0.289507	NS		CD99	Neutral	0.602665	NS		SCARB1	Neutral	0.0450879	NS
RAB34	Neutral	-0.280108	NS		EHBP1	Neutral	0.604515	0.0148426		SCRIB	Neutral	0.17897	NS
SOCS6	Neutral	-0.280108	NS		ROCK2	Neutral	0.605721	NS		SEC22B	Neutral	-0.799701	0.00358107
ATP5C1	Neutral	-0.275634	0.0288872		APPL2	Neutral	0.607683	NS		SEMA4C	Neutral	-0.232661	NS
DEPDC1B	Neutral	-0.275078	NS		MINK1	Neutral	0.616671	NS		SEMA6A	Neutral	-0.408085	NS
SAR1A	Neutral	-0.268489	NS		RTCD1	Neutral	0.616671	NS		SEMA6D	Neutral	-0.192645	NS
KIRREL	Neutral	-0.268018	NS		MTOR	Neutral	0.617913	0.0089081		SENP3	Neutral	-0.607683	NS
EXOC3	Neutral	-0.265097	NS		HEATR2	Neutral	0.621488	NS		SEPT11	Neutral	-0.223438	0.0314804
UPF3B	Neutral	-0.263034	NS		AKAP12	Neutral	0.628633	0.017753		SEPT2	Neutral	0.037556	NS
HSP90AA1	Neutral	-0.259087	NS		GDI2	Neutral	0.630766	0.031379		SEPT3	Neutral	0.584963	NS
KIAA1804	Neutral	-0.253757	NS		ARHGAP1	Neutral	0.633872	0.0441259		SEPT6	Neutral	-0.114643	NS
DDX39A	Neutral	-0.24664	0.028208		FAM134B	Neutral	0.63743	NS		SEPT7	Neutral	0.0558018	NS
RAB11FIP5	Neutral	-0.244419	NS		EHD4	Neutral	0.644905	0.032306		SEPT8	Neutral	0.354665	0.0114039
MTHFD1L	Neutral	-0.243926	NS		FAM126A	Neutral	0.646363	NS		SEPT9	Neutral	-0.734228	0.0023497
HSP90AB1	Neutral	-0.239634	NS		EXOC3	Neutral	0.654733	0.00217932		SFXN1	Neutral	-0.422943	0.00265124
ITGA4	Neutral	-0.238787	NS		STK10	Neutral	0.672425	NS		SH3BP4	Neutral	0.0588937	NS
APBB2	Neutral	-0.234465	NS		SLC26A2	Neutral	0.678072	NS		SHISA2	Neutral	-0.192645	NS
ZFYVE16	Neutral	-0.232363	0.0347		SLC9A3R2	Neutral	0.684498	NS		SHOC2	Neutral	-0.961526	0.0311734
EPHA3	Neutral	-0.230006	NS		TIAM1	Neutral	0.685891	NS		SLC12A2	Neutral	0.314908	0.0114162
FAM83B	Neutral	-0.227667	NS		PIK3R3	Neutral	0.689071	0.0472577		SLC12A4	Neutral	0.175087	NS
WWOX	Neutral	-0.223488	0.0357978		RHBDF2	Neutral	0.695145	NS		SLC12A6	Neutral	1.26303	NS
SPRED2	Neutral	-0.222392	NS		CABLES1	Neutral	0.695145	NS		SLC12A7	Neutral	0.349689	NS
EEPD1	Neutral	-0.217591	NS		ADD2	Neutral	0.69883	0.00249713		SLC16A1	Neutral	-0.503433	0.00164795
RFTN1	Neutral	-0.217591	NS		STX7	Neutral	0.736966	0.00812222		SLC19A1	Neutral	-0.621488	0.00149403
EFR3B	Neutral	-0.216037	NS		FARP2	Neutral	0.736966	0.015179		SLC1A3	Neutral	0.564264	NS
FAM171A1	Neutral	-0.211504	NS		IDI1	Neutral	0.752072	0.0167305		SLC1A4	Neutral	-0.215729	NS
PHF6	Neutral	-0.211504	NS		CDC42EP4	Neutral	0.75409	0.00187139		SLC1A5	Neutral	-0.696442	3.982e-06
JUP	Neutral	-0.211269	NS		ANO6	Neutral	0.754888	0.00121036		SLC20A2	Neutral	0.874469	NS
C8orf47	Neutral	-0.210218	NS		ELMO2	Neutral	0.758992	NS		SLC25A13	Neutral	-0.0255351	NS
CDC42EP1	Neutral	-0.208865	NS		C8orf47	Neutral	0.765535	0.00112661		SLC25A3	Neutral	0.707447	0.00147701
STRADA	Neutral	-0.206451	NS		STON1	Neutral	0.770518	NS		SLC25A5	Neutral	-0.501931	0.0381045
HSPA5	Neutral	-0.205424	NS		DOCK9	Neutral	0.779874	0.0419028		SLC25A6	Neutral	0.367057	NS
ADD3	Neutral	-0.201497	NS		SNAP25	Neutral	0.788496	NS		SLC26A2	Neutral	-1.48543	NS
SLC43A1	Neutral	-0.192645	NS		PLCB4	Neutral	0.788496	NS		SLC26A6	Neutral	0.5025	NS
LRP8	Neutral	-0.186413	NS		CTSB	Neutral	0.788496	NS		SLC29A1	Neutral	0.422233	0.00633567
ARHGAP5	Neutral	-0.185556	NS		PTGES3	Neutral	0.807355	NS		SLC30A1	Neutral	-0.205975	NS
SLC39A10	Neutral	-0.181711	NS		LDLRAP1	Neutral	0.807355	NS		SLC38A1	Neutral	-0.167945	NS
RAB11B	Neutral	-0.181447	NS		PRKAR2B	Neutral	0.821403	0.00443649		SLC39A10	Neutral	0.130502	NS
MAP4K4	Neutral	-0.179324	NS		PIP5K1C	Neutral	0.830075	NS		SLC39A14	Neutral	-0.602665	0.00745348
NCKAP1	Neutral	-0.177305	NS		EHD1	Neutral	0.836501	0.00734397		SLC3A2	Neutral	0.555718	0.00037326
DTNA	Neutral	-0.172837	NS		AHCYL2	Neutral	0.839535	0.0172411		SLC43A1	Neutral	-0.29956	NS
CAB39	Neutral	-0.169925	NS		PELO	Neutral	0.847997	0.0446904		SLC4A2	Neutral	1.32193	NS
NDUFS7	Neutral	-0.160465	NS		PACSIN3	Neutral	0.857981	NS		SLC4A7	Neutral	0.333628	0.00173552
RAF1	Neutral	-0.155651	NS		RABL3	Neutral	0.857981	NS		SLC6A15	Neutral	-0.619292	2.80181e-05
ITGA6	Neutral	-0.15389	NS		DENND5B	Neutral	0.862496	NS		SLC6A6	Neutral	0.351472	NS
EHD4	Neutral	-0.143591	NS		C1orf43	Neutral	0.862496	0.0174572		SLC6A8	Neutral	-0.141246	NS
DLG3	Neutral	-0.137504	NS		RAB34	Neutral	0.868755	0.0123946		SLC6A9	Neutral	-0.810175	0.00272923
PVRL1	Neutral	-0.137504	NS		PLXNB2	Neutral	0.884523	0.0181265		SLC7A1	Neutral	-1.29177	NS
TTC7B	Neutral	-0.135352	NS		TBC1D10A	Neutral	0.893085	0.00692005		SLC7A11	Neutral	0.817136	NS
STOM	Neutral	-0.131245	NS		NT5DC2	Neutral	0.893085	0.0300197		SLC7A2	Neutral	-0.0623965	NS
SLC1A3	Neutral	-0.128898	NS		CSE1L	Neutral	0.900464	0.00011349		SLC7A5	Neutral	-0.889442	0.00134437
DSG2	Neutral	-0.128507	NS		RALGAPA1	Neutral	0.912537	NS		SLC9A1	Neutral	0.932886	0.0457098
CDC42	Neutral	-0.120294	NS		CANX	Neutral	0.91427	0.0030674		SNAP23	Neutral	-0.470298	0.000485113
PRKAR2A	Neutral	-0.119464	NS		SEC22B	Neutral	0.917538	0.000324975		SNAP29	Neutral	-0.488101	0.0173286
ALCAM	Neutral	-0.118644	NS		CPD	Neutral	0.918031	0.00249145		SNAP47	Neutral	-0.189478	NS
MPP7	Neutral	-0.110846	NS		AUP1	Neutral	0.932886	NS		SNTB1	Neutral	0.532874	NS
GNB5	Neutral	-0.106915	NS		C1orf172	Neutral	0.938599	NS		SNTB2	Neutral	0.423808	NS
STXBP6	Neutral	-0.106915	NS		IQGAP1	Neutral	0.946229	1.56531e-05		SNX1	Neutral	-0.103836	NS
TAOK3	Neutral	-0.106915	NS		C8orf42	Neutral	0.947533	0.0444798		SNX2	Neutral	-0.777608	0.0124667
VTI1B	Neutral	-0.106915	NS		DTNA	Neutral	0.974005	NS		SNX9	Neutral	-0.463947	0.00687744
STEAP3	Neutral	-0.104634	NS		DHRS7	Neutral	0.975752	0.00810598		SOCS6	Neutral	0	NS
UNC5B	Neutral	-0.10188	NS		AGAP1	Neutral	1	NS		SPAG1	Neutral	-1.1375	NS
LDLRAP1	Neutral	-0.0995357	NS		EPB41L4A	Neutral	1	NS		SPTAN1	Neutral	0.0560759	NS
JPH1	Neutral	-0.0943274	NS		ATP13A3	Neutral	1.06413	NS		SPTBN1	Neutral	-0.513902	NS
EHD1	Neutral	-0.0931094	NS		FMN2	Neutral	1.10434	NS		SPTBN2	Neutral	-0.420332	NS
BAIAP2	Neutral	-0.0919225	NS		CCNY	Neutral	1.22239	NS		SRGAP2	Neutral	0.180572	NS
EFR3A	Neutral	-0.0885367	NS		UBLCP1	Neutral	1.24793	NS		STEAP3	Neutral	0.618219	0.000424935
EPHA2	Neutral	-0.0882272	NS		ERBB4	Neutral	1.28011	NS		STIM2	Neutral	0.245112	NS
PANX1	Neutral	-0.0859732	NS		AGPAT9	Neutral	1.29546	NS		STK10	Neutral	-0.97728	0.0151841
ACSL3	Neutral	-0.0848889	NS		RASA2	Neutral	1.45943	NS		STOM	Neutral	-0.0641303	NS
STXBP2	Neutral	-0.0780025	NS		EXOC5	Neutral	1.85798	NS		STRADA	Neutral	-0.321928	NS
GRID1	Neutral	-0.0740006	NS		UBB	NRAS	-6.37504	3.2008e-05		STT3A	Neutral	-0.263034	0.00902324
ABCC5	Neutral	-0.0725125	NS		TTC39C	NRAS	-6.02237	1.84368e-08		STX8	Neutral	-0.36257	NS
WASF1	Neutral	-0.0703893	NS		TP53	NRAS	-5.45943	0.000135926		STXBP2	Neutral	-0.247928	NS
UTRN	Neutral	-0.0656669	NS		TMF1	NRAS	-4.75489	0.0040894		STXBP3	Neutral	-0.632268	0.0108159
HSPA12A	Neutral	-0.0644887	NS		TNFAIP8	NRAS	-4.52356	0.000143179		STXBP5	Neutral	0.289507	NS
ARHGAP39	Neutral	-0.0641303	NS		SHKBP1	NRAS	-4.16993	0.00862499		STXBP6	Neutral	0.280108	NS
SPTBN1	Neutral	-0.0624225	NS		BCAP31	NRAS	-3.45943	0.000730315		SYTL4	Neutral	-0.736966	0.00629752
SLC30A5	Neutral	-0.0524674	NS		SLC30A6	NRAS	-3.1822	6.45915e-06		TAOK3	Neutral	-0.304855	NS
ZC3HAV1	Neutral	-0.0522562	NS		SLC35A2	NRAS	-3.08746	0.00022861		TBC1D10B	Neutral	0.246915	NS
SLC12A4	Neutral	-0.0473057	NS		SLC35E1	NRAS	-3.08746	5.53024e-06		TBC1D22B	Neutral	0.85561	NS
AGAP1	Neutral	-0.0443941	NS		CELSR2	NRAS	-2.87447	0.0004717		TCP1	Neutral	-0.584963	9.91726e-05
ROR2	Neutral	-0.0401891	NS		C2orf47	NRAS	-2.80735	0.00143953		TECR	Neutral	-0.408085	NS
SBF1	Neutral	-0.0365259	NS		SOAT1	NRAS	-2.74723	0.0112098		TIMM50	Neutral	-0.315687	NS
FCHO2	Neutral	-0.0326662	NS		GMDS	NRAS	-2.70044	0.00121036		TMEM2	Neutral	-0.731511	7.43407e-05
RICTOR	Neutral	-0.0310269	NS		ITGA1	NRAS	-2.6746	0.00183587		TMEM237	Neutral	0.667425	NS
PLXNA1	Neutral	-0.0246621	NS		GOPC	NRAS	-2.64386	0.00475487		TMEM33	Neutral	0.70044	0.0424626
DPM1	Neutral	-0.0242475	NS		ZDHHC18	NRAS	-2.63227	0.00334328		TMEM51	Neutral	-0.509014	NS
EHBP1	Neutral	-0.00553818	NS		CEPT1	NRAS	-2.45943	0.00124509		TMEM87A	Neutral	0.645335	NS
ADAM22	Neutral	0	NS		SLC5A6	NRAS	-2.43296	0.00596027		TMEM97	Neutral	0.125531	NS
ATAD1	Neutral	0	NS		SLC30A5	NRAS	-2.42502	6.48267e-06		TNFAIP8	Neutral	0.938599	0.032035
C11orf67	Neutral	0	NS		ANK3	NRAS	-2.41968	8.48108e-06		TNIK	Neutral	0.0198996	NS
C7orf59	Neutral	0	NS		PRMT5	NRAS	-2.36995	4.98892e-05		TOMM22	Neutral	0.336525	NS
CDK17	Neutral	0	NS		ZDHHC17	NRAS	-2.32193	0.00412316		TRIOBP	Neutral	-0.152003	NS
EBAG9	Neutral	0	NS		WDR48	NRAS	-2.32193	0.00897382		TRIP13	Neutral	-0.114171	NS
EXOC7	Neutral	0	NS		WDR77	NRAS	-2.18149	7.32085e-07		TTC7B	Neutral	0.457473	0.0185784
KIAA0754	Neutral	0	NS		GOLGA5	NRAS	-2.18081	5.30542e-07		TUFM	Neutral	-0.139163	0.0368856
NOTCH1	Neutral	0	NS		EBP	NRAS	-2.15528	6.05489e-05		TULP3	Neutral	-0.78958	0.000652565
OTUD7B	Neutral	0	NS		SLC16A10	NRAS	-2.11548	0.00245234		UBIAD1	Neutral	-0.758992	0.00977868
CYFIP2	Neutral	0.00422459	NS		GORASP2	NRAS	-2.03562	0.000294422		UNC5B	Neutral	0.819792	0.000319165
ADD2	Neutral	0.0129391	NS		CANT1	NRAS	-2	0.00476783		UPF3B	Neutral	-0.304855	NS
CLINT1	Neutral	0.0166147	NS		SPTAN1	NRAS	-1.90583	0.0265703		UQCRC2	Neutral	0.63743	0.00286736
MTMR10	Neutral	0.026967	NS		PDXDC1	NRAS	-1.90304	0.00167276		USP31	Neutral	0.965235	0.0195086
TMEM51	Neutral	0.0384741	NS		KRIT1	NRAS	-1.87447	0.0134		USP32	Neutral	0.383329	NS
WDR77	Neutral	0.0424353	NS		CLDN1	NRAS	-1.71621	0.02116		USP46	Neutral	-0.969626	0.00117212
FNBP1	Neutral	0.0582986	NS		SLC3A2	NRAS	-1.71363	0.00252381		USP6NL	Neutral	0.195171	NS
CSPG4	Neutral	0.0588937	NS		GOSR1	NRAS	-1.68806	0.0278113		USP9X	Neutral	0.744161	0.0089081
MCM2	Neutral	0.0627358	NS		CNKSR3	NRAS	-1.67807	0.0477774		UTRN	Neutral	-0.210615	NS
ARVCF	Neutral	0.065095	NS		PPFIBP1	NRAS	-1.66413	0.0204014		VAMP3	Neutral	-0.711042	NS
RHOT2	Neutral	0.0671142	NS		ADCK3	NRAS	-1.64386	0.000113686		VANGL1	Neutral	0.907198	0.000214687
ZFYVE9	Neutral	0.0671142	NS		FADS2	NRAS	-1.58496	0.0278113		VDAC1	Neutral	-0.563186	0.000302445
ROBO2	Neutral	0.0740006	NS		ARHGEF10	NRAS	-1.58496	0.0203118		VDAC2	Neutral	-0.247553	NS
LZTR1	Neutral	0.0746049	NS		ZDHHC13	NRAS	-1.58496	0.0240082		VDAC3	Neutral	0.373289	0.0457436
STX8	Neutral	0.0780025	NS		CACNB2	NRAS	-1.558	0.000146208		VPS45	Neutral	0.714598	0.0185784
PHLDB1	Neutral	0.0874628	NS		ABI2	NRAS	-1.54749	0.0028331		WASF1	Neutral	-1.58496	NS
SCD	Neutral	0.0874628	NS		TMEM87A	NRAS	-1.53842	0.00135632		WDR11	Neutral	0.604538	7.3846e-05
RAI14	Neutral	0.092682	NS		SLC25A10	NRAS	-1.53051	0.00380755		WDR20	Neutral	-0.787006	0.00355126
IDI1	Neutral	0.0931094	NS		ACBD3	NRAS	-1.52947	6.01482e-05		WDR6	Neutral	0.514573	0.00115985
PLCL2	Neutral	0.0995357	NS		ROR1	NRAS	-1.5025	0.0477774		WLS	Neutral	-0.868755	0.0176289
PKP2	Neutral	0.103623	NS		SPRY4	NRAS	-1.5025	0.0104958		WWOX	Neutral	-0.170747	NS
CANX	Neutral	0.106915	NS		BET1	NRAS	-1.45943	0.0043586		XPR1	Neutral	-0.131245	NS
PLEKHA7	Neutral	0.115477	NS		TAOK2	NRAS	-1.45943	0.0203118		YARS2	Neutral	-0.704544	0.0444265
TOMM22	Neutral	0.117357	NS		MPZL1	NRAS	-1.41093	0.00110019		YES1	Neutral	-0.745657	0.0001759
SEC22B	Neutral	0.117836	NS		SEPT3	NRAS	-1.34395	0.00823735		YWHAE	Neutral	-0.517136	0.0190165
USP32	Neutral	0.120294	NS		CSRP2	NRAS	-1.33442	0.00510751		ZC3HAV1	Neutral	-0.390537	0.000388385
WDR6	Neutral	0.124627	NS		ICMT	NRAS	-1.32193	0.0220965		ZDHHC14	Neutral	-0.36257	NS
MARK1	Neutral	0.131245	NS		DZIP1	NRAS	-1.32193	0.0174572		ZDHHC18	Neutral	-0.660514	NS
PARD3	Neutral	0.133678	NS		MAP2K1	NRAS	-1.29956	0.010198		ZDHHC5	Neutral	0.156119	NS
CDK5	Neutral	0.137504	NS		FAR1	NRAS	-1.28011	0.000316154		ZDHHC8	Neutral	0.747234	0.023495
PTPN13	Neutral	0.141092	NS		EPB41L4B	NRAS	-1.25987	0.00446235		ABCD3	NRAS	1.47675	6.72786e-06
AP2A1	Neutral	0.150243	NS		ANKRD26	NRAS	-1.25873	1.90575e-05		ABI2	NRAS	1.03847	0.0061196
NUDCD2	Neutral	0.152003	NS		FAM171B	NRAS	-1.24462	0.000848324		ACBD3	NRAS	1.4245	4.2129e-06
IGSF3	Neutral	0.169925	NS		NDUFV1	NRAS	-1.24101	0.0317685		ADCY9	NRAS	1.20732	0.00400215
TRAP1	Neutral	0.173536	NS		NOS1AP	NRAS	-1.22239	0.0384214		AKT1	NRAS	1.70044	0.011696
LRBA	Neutral	0.177174	NS		SLC2A1	NRAS	-1.21299	0.000330288		AKT2	NRAS	1.41504	7.45133e-05
ITGA7	Neutral	0.192645	NS		AKT2	NRAS	-1.19265	0.000110856		ANK3	NRAS	1.63589	2.55402e-07
FAM171B	Neutral	0.201634	NS		LMAN1	NRAS	-1.18982	0.0138584		AP3M1	NRAS	1.01306	0.0040914
ARF4	Neutral	0.202817	NS		PACS1	NRAS	-1.18057	0.0448173		ARHGAP12	NRAS	1.68806	0.0498253
PPFIA1	Neutral	0.208108	NS		RALA	NRAS	-1.16993	0.0195086		ARHGAP21	NRAS	1.17509	5.48872e-05
CASK	Neutral	0.220198	NS		RAN	NRAS	-1.15484	0.00103667		ARHGEF10	NRAS	4.39232	0.00358107
SLC12A7	Neutral	0.221214	NS		SLC25A3	NRAS	-1.15325	0.00064813		ATP6AP1	NRAS	5.08746	0.00903428
AKT2	Neutral	0.222392	NS		HSD17B12	NRAS	-1.13358	2.15051e-05		ATP6AP2	NRAS	3.87447	0.000108839
INSR	Neutral	0.232661	NS		NDRG1	NRAS	-1.11254	0.000154915		BCAP31	NRAS	4.45943	0.000423483
SNAP47	Neutral	0.244419	NS		NAMPT	NRAS	-1.10692	0.00163685		BTN3A2	NRAS	4.45943	0.00145034
EPHB2	Neutral	0.25634	NS		DLG5	NRAS	-1.08406	0.00124264		C19orf26	NRAS	1.30933	0.0004251
SLC1A4	Neutral	0.25634	NS		AIFM1	NRAS	-1.05889	0.0406623		CABLES1	NRAS	1.22239	0.0104017
EGFR	Neutral	0.263034	NS		SLC25A1	NRAS	-1.03562	0.000362506		CACNB2	NRAS	5.72792	5.02187e-07
NDUFV2	Neutral	0.263034	NS		SNTB1	NRAS	-1	0.00814169		CASKIN2	NRAS	3.27302	0.000499727
PRR5	Neutral	0.263034	NS		CLDND1	NRAS	-1	0.00373385		CCDC47	NRAS	1.7137	0.000245536
FTSJ1	Neutral	0.270089	NS							CCM2	NRAS	1.85798	0.00320671
CSNK1A1	Neutral	0.283793	NS							CDIPT	NRAS	1.03562	0.00145034
RP2	Neutral	0.285402	NS							CDK5	NRAS	1.05311	1.27953e-06
ELMO2	Neutral	0.289507	NS							CELSR2	NRAS	4.45943	0.000160901
PPP1R9A	Neutral	0.289507	NS							CEP89	NRAS	1.30378	0.00205481
PIP5K1C	Neutral	0.29956	NS							CEPT1	NRAS	3.45943	0.000361731
FMNL2	Neutral	0.302563	NS							CERS2	NRAS	3.36923	0.000423483
PIK3R1	Neutral	0.304855	NS							CLDND1	NRAS	1.96153	2.0288e-05
TNFRSF10B	Neutral	0.313158	NS							CNKSR3	NRAS	1.41504	0.0432703
PTRF	Neutral	0.314109	NS							CSNK1A1	NRAS	1.03103	0.000376669
PACS1	Neutral	0.321928	NS							DAB2IP	NRAS	1.73697	0.00244715
PTPRA	Neutral	0.321928	NS							DCBLD1	NRAS	1.06054	0.000590361
TNIK	Neutral	0.321928	NS							DHRS7	NRAS	4.90689	0.000146056
BRAF	Neutral	0.32681	NS							DLG1	NRAS	1.37987	0.0407664
LAMTOR3	Neutral	0.328623	NS							DLG5	NRAS	5.72792	1.27601e-05
XPR1	Neutral	0.334419	NS							DLGAP4	NRAS	2.73697	0.000269641
ERBB2	Neutral	0.345775	NS							DOCK11	NRAS	1.32193	0.0321045
MSN	Neutral	0.353637	0.0432703							DST	NRAS	1.39373	1.21656e-05
SPCS2	Neutral	0.36257	NS							DZIP1	NRAS	2.32193	0.0104017
ANKRD50	Neutral	0.371969	NS							EBAG9	NRAS	1.05889	0.0197404
RASA2	Neutral	0.371969	NS							EBP	NRAS	4.61471	4.28452e-06
KIAA0528	Neutral	0.378512	0.0273002							ELOVL5	NRAS	5.24793	0.00160886
ARHGAP21	Neutral	0.379704	NS							EMD	NRAS	1.00888	5.33559e-05
VMP1	Neutral	0.383329	NS							EPN1	NRAS	1.89308	2.0145e-05
EPB41L5	Neutral	0.389502	0.00617429							EXD2	NRAS	4.08746	0.00131073
PI4KA	Neutral	0.391687	NS							FAM171B	NRAS	1.44626	0.000234744
IGF1R	Neutral	0.403356	NS							FAM91A1	NRAS	1.30633	0.00141176
ANKS6	Neutral	0.415037	NS							FARP2	NRAS	1.80735	0.00461025
SH3BP4	Neutral	0.415037	NS							FLOT1	NRAS	1.43296	0.0272886
USP31	Neutral	0.415037	NS							GOLGA5	NRAS	2.16451	6.00672e-07
C19orf26	Neutral	0.418953	NS							GOSR1	NRAS	1.85798	0.0375309
TRIOBP	Neutral	0.432959	NS							ICMT	NRAS	4.32193	6.05489e-05
SEPT10	Neutral	0.447459	NS							IGF2R	NRAS	1.14439	0.000175241
ATP11C	Neutral	0.452512	NS							ILDR2	NRAS	1.05889	0.0262386
CDH2	Neutral	0.462343	0.0253052							ITGA1	NRAS	2.37504	0.00298181
CDC42BPA	Neutral	0.472068	0.027468							ITGA8	NRAS	2.152	0.0063143
EPHA4	Neutral	0.479168	NS							ITGB5	NRAS	3.90689	0.0106347
LBR	Neutral	0.484596	0.0473074							KCNB2	NRAS	5.49185	0.00135784
SRGAP2	Neutral	0.485427	NS							KCNQ5	NRAS	1.58496	0.0400578
TMEM33	Neutral	0.491853	NS							KIDINS220	NRAS	1.4245	0.00226892
STIM2	Neutral	0.49304	NS							KRIT1	NRAS	3.45943	0.000130707
FARP1	Neutral	0.513172	NS							LMAN1	NRAS	2.18982	0.0014293
FAM171A2	Neutral	0.517058	NS							LPHN1	NRAS	2.44057	0.00128852
KIDINS220	Neutral	0.524662	NS							LZTS2	NRAS	1.12553	0.011291
SNTB2	Neutral	0.525091	NS							MAGT1	NRAS	4	5.53024e-06
PKP4	Neutral	0.531851	0.0214725							MPRIP	NRAS	2.80735	0.0215096
RASAL2	Neutral	0.532221	NS							MRI1	NRAS	4.52356	3.35537e-05
PIGU	Neutral	0.536053	NS							MTOR	NRAS	1.07325	0.00827687
ITCH	Neutral	0.537657	0.0136905							MTPAP	NRAS	3.80735	0.000499727
RAB3B	Neutral	0.540568	NS							NDUFA12	NRAS	1.20163	0.011291
ROCK2	Neutral	0.544321	NS							NOS1AP	NRAS	3.22239	0.00628654
UBLCP1	Neutral	0.547488	NS							OCIAD1	NRAS	5.67243	0.00296644
SPCS3	Neutral	0.559427	NS							ODZ3	NRAS	1.17132	0.000906974
VANGL1	Neutral	0.571068	0.00319908							PACS1	NRAS	1.5025	0.036969
DCBLD1	Neutral	0.571157	0.00736406							PDXDC1	NRAS	2.41761	0.000798347
FLRT3	Neutral	0.574694	NS							PFKL	NRAS	1.59455	1.31571e-05
SLC9A1	Neutral	0.584963	0.0271396							PIK3CA	NRAS	2.47805	0.0036199
STARD3	Neutral	0.584963	NS							PLCH1	NRAS	1.93161	0.00127659
PIK3R2	Neutral	0.588022	3.89634e-05							PRMT5	NRAS	1.0614	0.000679138
TFRC	Neutral	0.589067	0.0107998							PTPRG	NRAS	1.26628	5.86967e-05
ATP7A	Neutral	0.601451	NS							SDK1	NRAS	2.08746	0.0139069
SLC30A4	Neutral	0.605721	NS							SDK2	NRAS	1.41504	0.00743446
ARL6IP5	Neutral	0.615336	0.0494278							SEPT10	NRAS	1.24101	0.0215704
CSE1L	Neutral	0.626025	6.78592e-05							SHKBP1	NRAS	2.58496	0.0169647
RAB18	Neutral	0.628031	NS							SLC16A10	NRAS	3.70044	0.000324975
ABCD3	Neutral	0.634545	0.0074101							SLC25A1	NRAS	1.77259	7.40071e-05
CACHD1	Neutral	0.639118	0.00862499							SLC25A10	NRAS	3.37851	0.000896102
STX2	Neutral	0.652077	NS							SLC25A11	NRAS	1.38773	0.00246273
WDR11	Neutral	0.665452	2.19029e-06							SLC25A17	NRAS	3.80735	1.27601e-05
GPRC5A	Neutral	0.678072	0.0321045							SLC2A1	NRAS	1.14886	0.000257198
GPRIN3	Neutral	0.678072	NS							SLC30A5	NRAS	2.37255	1.27601e-05
LPGAT1	Neutral	0.678072	NS							SLC30A6	NRAS	3.71272	7.90831e-06
RER1	Neutral	0.678072	0.0400578							SLC35A2	NRAS	2.5025	0.000423483
ZDHHC8	Neutral	0.684498	0.0466871							SLC35E1	NRAS	4.08746	2.85378e-05
AKAP5	Neutral	0.690316	0.0147879							SLC39A6	NRAS	1.02046	0.00977868
MARK2	Neutral	0.694192	NS							SLC4A4	NRAS	1.73697	0.0164113
SPTBN2	Neutral	0.701659	NS							SLC5A6	NRAS	1.05445	0.0382452
SLC39A6	Neutral	0.703607	0.0181265							SLC9B2	NRAS	1	0.0254739
FAM126A	Neutral	0.710493	NS							SOAT1	NRAS	5.55459	0.00470526
VPS45	Neutral	0.714598	0.0110834							SPRY4	NRAS	2.5025	0.00162945
PHLDB2	Neutral	0.736966	NS							STIM1	NRAS	2.06609	0.00103908
SLC20A2	Neutral	0.736966	NS							STX5	NRAS	3.32193	3.89514e-07
ERBB4	Neutral	0.765535	NS							SULT1A1	NRAS	2.70044	0.000386037
RABL3	Neutral	0.770518	NS							TAOK2	NRAS	3.45943	0.000130707
CDC37	Neutral	0.799087	8.49675e-05							TFRC	NRAS	1.0485	0.0141686
DNM2	Neutral	0.819428	0.00196254							THSD1	NRAS	3	0.00768036
DOCK1	Neutral	0.819428	0.0262386							TMEM48	NRAS	2.62803	0.0005225
MINK1	Neutral	0.823122	NS							TMF1	NRAS	4.75489	0.0040894
CPD	Neutral	0.828596	0.0033308							TOE1	NRAS	1.52356	0.042911
DAB2	Neutral	0.830075	NS							TOR1AIP1	NRAS	2.29546	0.00134331
ABCC1	Neutral	0.836501	0.000774413							TP53	NRAS	5.45943	0.000135926
KIAA1522	Neutral	0.841302	0.0366291							TRPM4	NRAS	3.45943	0.00135632
LNPEP	Neutral	0.841302	0.0165574							TTC39C	NRAS	2.43741	7.46834e-07
FIBP	Neutral	0.84549	0.00124443							UBB	NRAS	6.37504	3.2008e-05
GOLGA7	Neutral	0.874469	NS							UBXN4	NRAS	4.42626	0.0019207
MAPKAP1	Neutral	0.886343	0.00124264							VANGL2	NRAS	1.27392	0.000219061
MICAL3	Neutral	0.889817	0.00131745							VAPA	NRAS	1.62803	3.54962e-05
LZTS2	Neutral	0.932886	NS							WDR48	NRAS	1.26946	0.0300823
CEP89	Neutral	0.954196	0.0101755							WDR77	NRAS	2.22393	2.26895e-06
VANGL2	Neutral	0.955606	0.000281722							ZDHHC13	NRAS	3.16993	0.00131073
NOP16	Neutral	0.959358	0.0272886							ZDHHC17	NRAS	4.32193	0.0014293
CLDND1	Neutral	0.961526	NS
AKAP12	Neutral	0.986825	0.00340559
PRKAR2B	Neutral	0.988859	5.95196e-06
AP1M1	Neutral	1	NS
SDK2	Neutral	1	NS
TOE1	Neutral	1.08746	NS
HEATR2	Neutral	1.152	NS
ECE1	Neutral	1.24793	NS
P4HB	Neutral	1.28011	NS
RALGAPA1	Neutral	1.29956	NS
FMN2	Neutral	1.3388	NS
DENND5B	Neutral	1.51457	NS
EXOC5	Neutral	1.53605	NS
EPB41L4A	Neutral	1.58496	NS

## Sheet: TableS7-Highly pref. PPI
Table S7. Identification of the highly preferential proximal interactors of FB-KRAS, FB-NRAS or FB-HRAS. Log2 ratio of total spectral counts detected for each of the indicated polypeptides according to the corresponding baits: FB-KRAS versus FB-HRAS, FB-KRAS versus FB-NRAS, FB-NRAS versus FB-HRAS. One spectral count was added to all totals for this analysis, to avoid division by 0. Only hits with…
Gene ID	Bait preferential proximal interactor	Log2 ratio FB-KRAS/FB-HRAS	Log2 ratio FB-KRAS/FB-NRAS		Gene ID	Bait preferential proximal interactor	Log2 ratio FB-KRAS/FB-NRAS	Log2 ratio FB-NRAS/FB-HRAS		Gene ID	Bait preferential proximal interactor	Log2 ratio FB-NRAS/FB-HRAS	Log2 ratio FB-KRAS/FB-HRAS
BID	KRAS	1	4.16993		UBB	NRAS	-6.37504	6.37504		C15orf38	HRAS	-8.01123	-8.01123
IQGAP2	KRAS	1.05063	1.61005		TP53	NRAS	-5.45943	5.45943		S100A11	HRAS	-6.61471	-4.02975
INF2	KRAS	1.16993	2.43296		TMF1	NRAS	-4.75489	4.75489		RRAGA	HRAS	-6.14975	-6.14975
KALRN	KRAS	1.19265	4		SHKBP1	NRAS	-4.16993	2.58496		C19orf70	HRAS	-5.67243	-2.5025
ADCY6	KRAS	1.20163	1.35364		BCAP31	NRAS	-3.45943	4.45943		DYNLL1	HRAS	-5.24793	-4.24793
IPO5	KRAS	1.2123	2.48239		SLC30A6	NRAS	-3.1822	3.71272		CDC42EP3	HRAS	-5	-3.41504
PGD	KRAS	1.2303	5.93074		SLC35E1	NRAS	-3.08746	4.08746		VPS33A	HRAS	-4.9386	-1.87971
KIAA0195	KRAS	1.29768	1.23879		SLC35A2	NRAS	-3.08746	2.5025		RAP2A	HRAS	-4.90689	-2.58496
PLEKHO2	KRAS	1.35364	4.52356		CELSR2	NRAS	-2.87447	4.45943		COX4I1	HRAS	-4.85798	-2.53605
C11orf2	KRAS	1.41504	1.36257		SOAT1	NRAS	-2.74723	5.55459		UQCRFS1	HRAS	-4.85798	-1.39855
FKBP8	KRAS	1.44057	4.24793		ITGA1	NRAS	-2.6746	2.37504		PLSCR3	HRAS	-4.82443	-1.55141
DAZAP1	KRAS	1.45943	4.78136		CEPT1	NRAS	-2.45943	3.45943		BTN3A1	HRAS	-4.70044	-4.70044
TMX1	KRAS	1.65208	1.87447		SLC5A6	NRAS	-2.43296	1.05445		SLCO4C1	HRAS	-4.45943	-4.45943
LRPPRC	KRAS	1.65605	1.89308		SLC30A5	NRAS	-2.42502	2.37255		C12orf75	HRAS	-4.39232	-4.39232
TNKS1BP1	KRAS	1.66985	1.04182		ANK3	NRAS	-2.41968	1.63589		CALU	HRAS	-4.39232	-2.39232
AGPAT6	KRAS	1.78427	1.78427		ZDHHC17	NRAS	-2.32193	4.32193		MTFP1	HRAS	-4.24793	-1.926
SLC29A2	KRAS	1.926	1.44057		WDR77	NRAS	-2.18149	2.22393		SEC61A1	HRAS	-4.20945	-2.50901
CNNM4	KRAS	2.09516	1.03103		GOLGA5	NRAS	-2.18081	2.16451		SH3GL3	HRAS	-4.12928	-2.32193
MIF	KRAS	2.14684	2.63227		EBP	NRAS	-2.15528	4.61471		TOMM6	HRAS	-4.08746	-3.08746
PKN1	KRAS	2.22239	2.80735		SLC16A10	NRAS	-2.11548	3.70044		SNX12	HRAS	-4.02975	-4.02975
MACF1	KRAS	2.30485	2.30485		PDXDC1	NRAS	-1.90304	2.41761		SNX17	HRAS	-3.88264	-2.56071
GNAI2	KRAS	2.32193	2.32193		KRIT1	NRAS	-1.87447	3.45943		PITPNB	HRAS	-3.80735	-3.80735
MOSPD2	KRAS	2.5025	1.5025		GOSR1	NRAS	-1.68806	1.85798		NPC1	HRAS	-3.80735	-2.80735
RIOK2	KRAS	2.58496	1.36257		CNKSR3	NRAS	-1.67807	1.41504		LASP1	HRAS	-3.7866	-4.10852
FMNL3	KRAS	2.76553	1.38702		ARHGEF10	NRAS	-1.58496	4.39232		ADAM15	HRAS	-3.70044	-4.70044
FAM49B	KRAS	2.80735	3.80735		ZDHHC13	NRAS	-1.58496	3.16993		TYMS	HRAS	-3.62449	-1.30256
GNS	KRAS	2.80735	3.39232		ABI2	NRAS	-1.54749	1.03847		GALK1	HRAS	-3.60881	-2.34577
NUDT1	KRAS	2.80735	2.80735		SLC25A10	NRAS	-1.53051	3.37851		CMIP	HRAS	-3.58496	-2
COX4NB	KRAS	2.80735	1.80735		ACBD3	NRAS	-1.52947	1.4245		UBE2V1	HRAS	-3.58496	-1
SSR1	KRAS	2.87447	4.45943		SPRY4	NRAS	-1.5025	2.5025		PSEN1	HRAS	-3.54432	-1.95936
NF1	KRAS	3.32193	1.51457		TAOK2	NRAS	-1.45943	3.45943		B2M	HRAS	-3.45943	-5.04439
ATP6V0A2	KRAS	3.45943	3.45943		ICMT	NRAS	-1.32193	4.32193		SLC1A1	HRAS	-3.39232	-2.80735
SLC30A9	KRAS	3.45943	1.87447		DZIP1	NRAS	-1.32193	2.32193		STX3	HRAS	-3.36923	-2.04731
BTN3A3	KRAS	3.45943	1.45943		FAM171B	NRAS	-1.24462	1.44626		UQCRB	HRAS	-3.32193	-2.32193
KCTD12	KRAS	3.54432	2.32193		SLC2A1	NRAS	-1.21299	1.14886		UBE2M	HRAS	-3.29546	-2.16993
ADI1	KRAS	3.58496	3.58496		AKT2	NRAS	-1.19265	1.41504		CHMP6	HRAS	-3.18587	-2.92283
TBC1D23	KRAS	3.58496	3.58496		LMAN1	NRAS	-1.18982	2.18982		COX7A2	HRAS	-3.16993	-1.16993
VPS35	KRAS	3.62449	4.20945		PACS1	NRAS	-1.18057	1.5025		ACAP2	HRAS	-3.12928	-1.12928
VEZT	KRAS	3.80735	3.80735		SLC25A1	NRAS	-1.03562	1.77259		SLC9A3R1	HRAS	-3.05063	-1.27302
DNAJB11	KRAS	3.80735	1.48543		CLDND1	NRAS	-1	1.96153		C1orf198	HRAS	-2.9558	-2.14136
DGKD	KRAS	3.90689	1.09954		VTI1B	KRAS and HRAS	1	-1.10692		YWHAH	HRAS	-2.94753	-1.50696
SLC7A6	KRAS	4	3		CDC42	KRAS and HRAS	1.00899	-1.12928		NEBL	HRAS	-2.89947	-1.84503
LRP6	KRAS	4	1.67807		WDR41	KRAS and HRAS	1.07325	-1.63421		RAB11FIP2	HRAS	-2.822	-3.822
STK11IP	KRAS	4.08746	4.08746		PSTPIP2	KRAS and HRAS	1.0902	-1.61566		RDX	HRAS	-2.70571	-2.09803
TRIO	KRAS	4.08746	1.05184		ARHGAP39	KRAS and HRAS	1.1375	-1.20163		SLC23A2	HRAS	-2.63743	-2.48543
KIAA0319L	KRAS	4.16993	1.848		STEAP2	KRAS and HRAS	1.1964	-1.60486		DOLPP1	HRAS	-2.63227	-1.25376
MGST3	KRAS	4.24793	4.24793		NDUFS3	KRAS and HRAS	1.21412	-1.79909		CCDC8	HRAS	-2.61891	-1.10434
DENND3	KRAS	4.32193	2.32193		PHF6	KRAS and HRAS	1.24793	-1.45943		CHMP5	HRAS	-2.61626	-1.37233
ARAP2	KRAS	4.52356	1.52356		PANX1	KRAS and HRAS	1.2783	-1.36427		SNX6	HRAS	-2.50901	-1.50901
TDRKH	KRAS	4.58496	4.58496		MSN	KRAS and HRAS	1.35364	-1		STX4	HRAS	-2.49185	-1.90689
PRDX5	KRAS	5.04439	2.45943		SPRED2	KRAS and HRAS	1.41504	-1.63743		C14orf133	HRAS	-2.48543	-1.22239
HMOX2	KRAS	5.88264	1.42321		YWHAB	KRAS and HRAS	1.44876	-1.97046		VAMP4	HRAS	-2.32193	-2.12928
TRIM13	KRAS	5.93074	1.84327		CDH2	KRAS and HRAS	1.49476	-1.03242		PTPRF	HRAS	-2.32193	-1.8625
ZDHHC18	HRAS and NRAS	-3.29278	-2.63227		PCDH9	KRAS and HRAS	1.78427	-2.73697		JAM2	HRAS	-2.32193	-1.32193
CLDN1	HRAS and NRAS	-2.51457	-1.71621		ZFYVE16	KRAS and HRAS	1.80386	-2.03622		HYOU1	HRAS	-2.2854	-1.33121
EPB41L4B	HRAS and NRAS	-2.11839	-1.25987		MARCKSL1	KRAS and HRAS	1.85244	-2.47393		FBXO17	HRAS	-2.28011	-3.08746
RALA	HRAS and NRAS	-2	-1.16993		OTUD7B	KRAS and HRAS	1.87447	-1.87447		AIDA	HRAS	-2.24793	-1.66297
SPTAN1	HRAS and NRAS	-1.84976	-1.90583		PARVA	KRAS and HRAS	1.89308	-2.36257		PVRL3	HRAS	-2.22239	-2.80735
CANT1	HRAS and NRAS	-1.80735	-2		TNFRSF10B	KRAS and HRAS	1.89812	-1.58496		SRSF2	HRAS	-2.20945	-1.88753
GOPC	HRAS and NRAS	-1.80735	-2.64386		FAM125A	KRAS and HRAS	2	-2.86507		NOP58	HRAS	-2.08964	-1.82045
ROR1	HRAS and NRAS	-1.73697	-1.5025		PTPRA	KRAS and HRAS	2.05889	-1.73697		DBNL	HRAS	-2.08746	-1.26149
NDRG1	HRAS and NRAS	-1.6933	-1.11254		C7orf59	KRAS and HRAS	2.08746	-2.08746		MAD2L1	HRAS	-2.03953	-1.88753
CSRP2	HRAS and NRAS	-1.68589	-1.33442		RSPRY1	KRAS and HRAS	2.08746	-2.39232		CNN3	HRAS	-2.03355	-2.05063
HSD17B12	HRAS and NRAS	-1.44961	-1.13358		VPS37B	KRAS and HRAS	2.39232	-3.49185		STX6	HRAS	-2.02647	-1.49596
MPZL1	HRAS and NRAS	-1.43539	-1.41093		FMNL2	KRAS and HRAS	2.4021	-2.09954		SLC19A2	HRAS	-2	-2.32193
MAP2K1	HRAS and NRAS	-1.36565	-1.29956		ARL6IP5	KRAS and HRAS	2.46949	-1.85415		MET	HRAS	-2	-1.5502
PPFIBP1	HRAS and NRAS	-1.35267	-1.66413		ZFYVE9	KRAS and HRAS	2.65208	-2.58496		TBC1D10A	HRAS	-2	-1.10692
BET1	HRAS and NRAS	-1.32193	-1.45943		LAMTOR2	KRAS and HRAS	2.90689	-3.77259		C8orf42	HRAS	-1.974	-1.02647
GORASP2	HRAS and NRAS	-1.29278	-2.03562		ITPA	KRAS and HRAS	3.05889	-3.54432		FNBP1L	HRAS	-1.97199	-1.58496
SLC3A2	HRAS and NRAS	-1.15791	-1.71363		SPCS2	KRAS and HRAS	3.16993	-2.80735		NDUFAF2	HRAS	-1.92338	-1.65208
ANKRD26	HRAS and NRAS	-1.05063	-1.25873		NUDCD2	KRAS and HRAS	3.32193	-3.16993		SLC38A2	HRAS	-1.91832	-1.79168
AIFM1	HRAS and NRAS	-1	-1.05889		NEDD4L	KRAS and HRAS	4.70044	-5.49185		GDI2	HRAS	-1.90378	-1.27302
										TIMM23	HRAS	-1.89308	-1.19794
										BSG	HRAS	-1.8365	-1.37084
										STX7	HRAS	-1.83458	-1.09761
										GIPC1	HRAS	-1.81399	-1.48278
										BASP1	HRAS	-1.79796	-1.86507
										AHCYL1	HRAS	-1.77118	-1.17982
										MFAP3	HRAS	-1.76553	-1.28011
										ZDHHC20	HRAS	-1.7625	-1.81497
										NAPA	HRAS	-1.73697	-2.32193
										RAB21	HRAS	-1.73697	-1.55639
										STXBP1	HRAS	-1.68806	-1.68806
										TIMM13	HRAS	-1.67807	-2.67807
										TAGLN2	HRAS	-1.672	-1.96331
										DLD	HRAS	-1.67138	-2.25634
										JAM3	HRAS	-1.63982	-2.06609
										LOC101060252	HRAS	-1.63472	-1.29768
										RAB23	HRAS	-1.62396	-1.37084
										CNN2	HRAS	-1.58496	-1.922
										CUL1	HRAS	-1.58496	-1.6845
										ATP2B4	HRAS	-1.58496	-1.66742
										PODXL	HRAS	-1.58496	-1.36257
										YKT6	HRAS	-1.55041	-1.58877
										BRK1	HRAS	-1.51457	-1.41504
										FERMT1	HRAS	-1.48543	-1.63743
										STX12	HRAS	-1.4689	-1.15116
										TC2N	HRAS	-1.46395	-1.46395
										JAG2	HRAS	-1.44746	-1.58496
										ABCE1	HRAS	-1.43769	-1.654
										NOLC1	HRAS	-1.42626	-2.92376
										VAMP2	HRAS	-1.41938	-1.35147
										ADAM17	HRAS	-1.41504	-3.58496
										SRP9	HRAS	-1.41504	-1.41504
										LDHA	HRAS	-1.41063	-1.59826
										PDE6D	HRAS	-1.37851	-1.53051
										PKM2	HRAS	-1.35832	-1.2543
										NCS1	HRAS	-1.34792	-1.34792
										PHGDH	HRAS	-1.32862	-1.55849
										SNX3	HRAS	-1.32193	-1.64386
										VAMP8	HRAS	-1.3112	-1.81816
										UBE2N	HRAS	-1.31034	-1.9542
										EFNB3	HRAS	-1.30166	-1.51847
										OCLN	HRAS	-1.29083	-1.16357
										PLEKHA2	HRAS	-1.28951	-1.65208
										MAP4K5	HRAS	-1.28688	-1.37002
										ADIPOR1	HRAS	-1.28011	-2.13993
										CXADR	HRAS	-1.28011	-1.19522
										ATP1A1	HRAS	-1.27069	-1.36972
										STK11	HRAS	-1.2578	-1.6939
										RAB12	HRAS	-1.25376	-1.49476
										ANXA2	HRAS	-1.23283	-1
										SLC5A3	HRAS	-1.23266	-1.51019
										RASA3	HRAS	-1.23133	-1.43296
										LARS	HRAS	-1.20221	-1.03824
										DNAJB6	HRAS	-1.20163	-1.71621
										OAT	HRAS	-1.19265	-1
										TMED10	HRAS	-1.18442	-1.05889
										ATP5L	HRAS	-1.17834	-2.25634
										VAT1	HRAS	-1.17632	-1.29662
										RELL1	HRAS	-1.15024	-1.09276
										NDUFS2	HRAS	-1.14543	-1.06054
										CNP	HRAS	-1.14405	-1.37851
										DHX30	HRAS	-1.13191	-1.19465
										PVRL2	HRAS	-1.12807	-1.34032
										CORO1C	HRAS	-1.11915	-1.65711
										NIPSNAP1	HRAS	-1.11548	-1.70044
										BAIAP2L1	HRAS	-1.08873	-1.41335
										SRC	HRAS	-1.0833	-1.37281
										PDAP1	HRAS	-1.074	-1.05514
										SLC22A5	HRAS	-1.07039	-1.16993
										SCAMP1	HRAS	-1.0686	-0.99554
										LYPLA2	HRAS	-1.02584	-2.94145
										FERMT2	HRAS	-1.01687	-1.40637
										ILDR2	NRAS and KRAS	1.05889	1.36923
										MTOR	NRAS and KRAS	1.07325	1.69116
										ODZ3	NRAS and KRAS	1.17132	1.03715
										ADCY9	NRAS and KRAS	1.20732	1.03882
										CABLES1	NRAS and KRAS	1.22239	1.91754
										PTPRG	NRAS and KRAS	1.26628	1.04793
										FAM91A1	NRAS and KRAS	1.30633	1.81399
										DOCK11	NRAS and KRAS	1.32193	1.34239
										DST	NRAS and KRAS	1.39373	1.20476
										FLOT1	NRAS and KRAS	1.43296	1.1375
										AKT1	NRAS and KRAS	1.70044	2.16993
										CCDC47	NRAS and KRAS	1.7137	1.83188
										DAB2IP	NRAS and KRAS	1.73697	1.66297
										FARP2	NRAS and KRAS	1.80735	2.54432
										CCM2	NRAS and KRAS	1.85798	1.45943
										EPN1	NRAS and KRAS	1.89308	1.36257
										PLCH1	NRAS and KRAS	1.93161	1.73697
										STIM1	NRAS and KRAS	2.06609	2.39232
										SDK1	NRAS and KRAS	2.08746	2.58496
										ITGA8	NRAS and KRAS	2.152	2.078
										LPHN1	NRAS and KRAS	2.44057	1.80735
										PIK3CA	NRAS and KRAS	2.47805	2.32193
										TMEM48	NRAS and KRAS	2.62803	2.51785
										SULT1A1	NRAS and KRAS	2.70044	2.67807
										MPRIP	NRAS and KRAS	2.80735	2.97728
										THSD1	NRAS and KRAS	3	3.16993
										CASKIN2	NRAS and KRAS	3.27302	2.80735
										STX5	NRAS and KRAS	3.32193	3.07039
										CERS2	NRAS and KRAS	3.36923	3.11548
										TRPM4	NRAS and KRAS	3.45943	3.32193
										ATP6AP2	NRAS and KRAS	3.87447	4.11548
										MAGT1	NRAS and KRAS	4	4.32193
										EXD2	NRAS and KRAS	4.08746	4
										UBXN4	NRAS and KRAS	4.42626	4.78136
										BTN3A2	NRAS and KRAS	4.45943	4.08746
										DHRS7	NRAS and KRAS	4.90689	5.88264
										ATP6AP1	NRAS and KRAS	5.08746	5.16993
										ELOVL5	NRAS and KRAS	5.24793	4.90689
										KCNB2	NRAS and KRAS	5.49185	5.2854
										OCIAD1	NRAS and KRAS	5.67243	4.85798

## Sheet: TableS8-PLA
Table S8. Selected interactors for proximity ligation assay (PLA). Based on the spectral count and Significance Analysis of INTeractomes (SAINT) score, specific interactors with each RAS paralog were selected for interaction validation by PLA. BRAF (green) was selected as positive control (interaction with all three RAS paralogs).
					FlagBirA*-HRAS WT			FlagBirA*-NRAS WT			FlagBirA*-KRAS WT
Gene ID	Protein ID	Gene Name	Top 2 controls		Total specral count	Total unique peptides	SAINT	Total specral count	Total unique peptides	SAINT	Total specral count	Total unique peptides	SAINT
673	33188459	BRAF	1	1	58	24	1.00	108	32	1.00	73	23	1.00
3927	5453710	LASP1	3	3	68	17	1.00	4	4		3	3
6282	5032057	S100A11	4	3	97	8	1.00	0	0		5	2
5911	10518344	RAP2A	0	0	59	10	1.00	1	1		9	5
10682	5729810	EBP	1	0	1	1		48	12	1.00	10	5
92799	223005950	SHKBP1	0	0	2	2		17	9	0.99	0	0
5226	40068518	PGD	5	4	25	10		0	0		60	23	0.89
10206	16445412	TRIM13	2	2	0	0		16	8		60	17	1.00
55737	17999541	VPS35	2	1	2	2		1	1		36	21	0.98

## Sheet: Table S9-Cloning
Table S9. Primers, destination plasmids, cloning sites and DNA templates.
Gene of interest (NCBI ID)	Montpellier Genomic Colletion clone ID	Primer		Plasmid	Cloning site
		Forward	Reverse
HRAS (NM_005343.3)	IOH39420	tataggcgcgccaatgacggaatataagctggtg	ttaagcggccgctcaggagagcacacacttgca	pcDNA5-FLAG-BirAR118G	AscI/NotI
NRAS (NM_002524.4)	IOH1768	tataggcgcgccaatgactgagtacaaactggtg	ttaagcggccgcttacatcaccacacatggcaa	pcDNA5-FLAG-BirAR118G	AscI/NotI
KRAS (NM_004985.4)	IOH53851	tataggcgcgccaatgactgaatataaacttgtg	ttaagcggccgcttacataattacacactttgt	pcDNA5-FLAG-BirAR118G	AscI/NotI
BRAF (NM_004333.4)	IOH82214	tataggcgcgccaatggcggcgctgagcggtggc	ttaagcggccgctcagtggacaggaaacgcacc	pcDNA3-3xHA	AscI/NotI
LASP1 (NM_006148.3)	IOH54875	tataggcgcgccaatgaaccccaactgcgcccgg	ttaagcggccgctcagatggcctccacgtagtt	pcDNA3-3xHA	AscI/NotI
S100A11 (NM_005620.1)	IOH4079	tataggcgcgccaatggcaaaaatctccagccct	ttaagcggccgctcaggtccgcttctgggaagg	pcDNA3-3xHA	AscI/NotI
RAP2A (NM_021033.6)	IOH25829	tataggcgcgccaatgcgcgagtacaaagtggtg	ttaagcggccgcctattgtatgttacatgcaga	pcDNA3-3xHA	AscI/NotI
PGD (NM_002631.3)	IOH3407	tataggcgcgccaatggcccaagctgacatcgcg	ttaagcggccgctcaggcattgtatgacgagga	pcDNA3-3xHA	AscI/NotI
TRIM13 (NM_001007278.2)	IOH57782	tataggcgcgccaatggagctgcttgaagaagat	ttaagcggccgcttataatagtttatatttgca	pcDNA3-3xHA	AscI/NotI
VPS35 (NM_018206.4)	IOH4148	tataggcgcgccaatgcctacaacacagcagtcc	ttaagcggccgcttaaaggatgagaccttcata	pcDNA3-3xHA	AscI/NotI
EBP (NM_006579.2)	IOH11243	tataggcgcgccaatgactaccaacgcgggcccc	ttaagcggccgctcagttcttcttgctcttggc	pcDNA3-3xHA	AscI/NotI
SHKBP1 (BC022855.1)	IOH13855	tataggcgcgccaatggcagcagcggctactgca	ttaagcggccgctcaaaaggaagtttcattgag	pcDNA3-3xHA	AscI/NotI
